# Supplementary material for: Comprehensive transcriptome analysis of reference genes for fruit development of Euscaphis konishii
Source: PeerJ journal article supplement (doi:10.7717/peerj.8474), 2020-02-11
Supplement: Figure_S2.pdf [file Figure_S2.pdf]

Protein Coding Gene Models

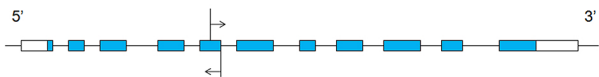

Gene ID: c71660.graph\_c1

Reference gene model: AT1G13440.1(*Arabidopsis*)

Protein Coding Gene Models

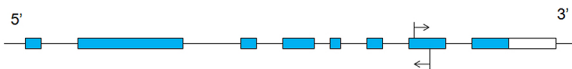

Gene ID: c67010.graph\_c0

Reference gene model: AT2G16920.1(*Arabidopsis*)

Protein Coding Gene Models

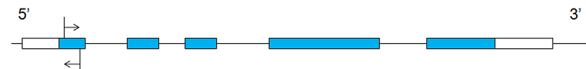

Gene ID: c67439.graph\_c2

Reference gene model: AT5G19770.1(*Arabidopsis*)

Protein Coding Gene Models

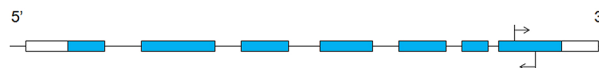

Gene ID: c67539.graph\_c0

Reference gene model: AT3G01480.1(*Arabidopsis*)

Protein Coding Gene Models

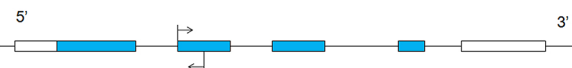

Gene ID: c62586.graph\_c0

Reference gene model: AT3G52590.1(*Arabidopsis*)

Protein Coding Gene Models

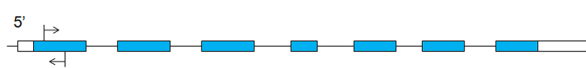

Gene ID: c65728.graph\_c0

Reference gene model: AT3G15020.2(*Arabidopsis*)

Protein Coding Gene Models

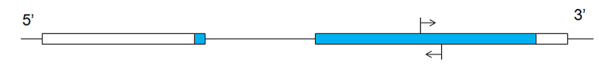

Gene ID: c63030.graph\_c0

Reference gene model: AT3G47520.1(*Arabidopsis*)

Protein Coding Gene Models

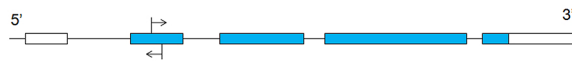

Gene ID: c63658.graph\_c0

Reference gene model: AT5G09810.1(*Arabidopsis*)
