# Supplementary material for: Comprehensive transcriptome analysis of reference genes for fruit development of Euscaphis konishii
Source: PeerJ journal article supplement (doi:10.7717/peerj.8474), 2020-02-11

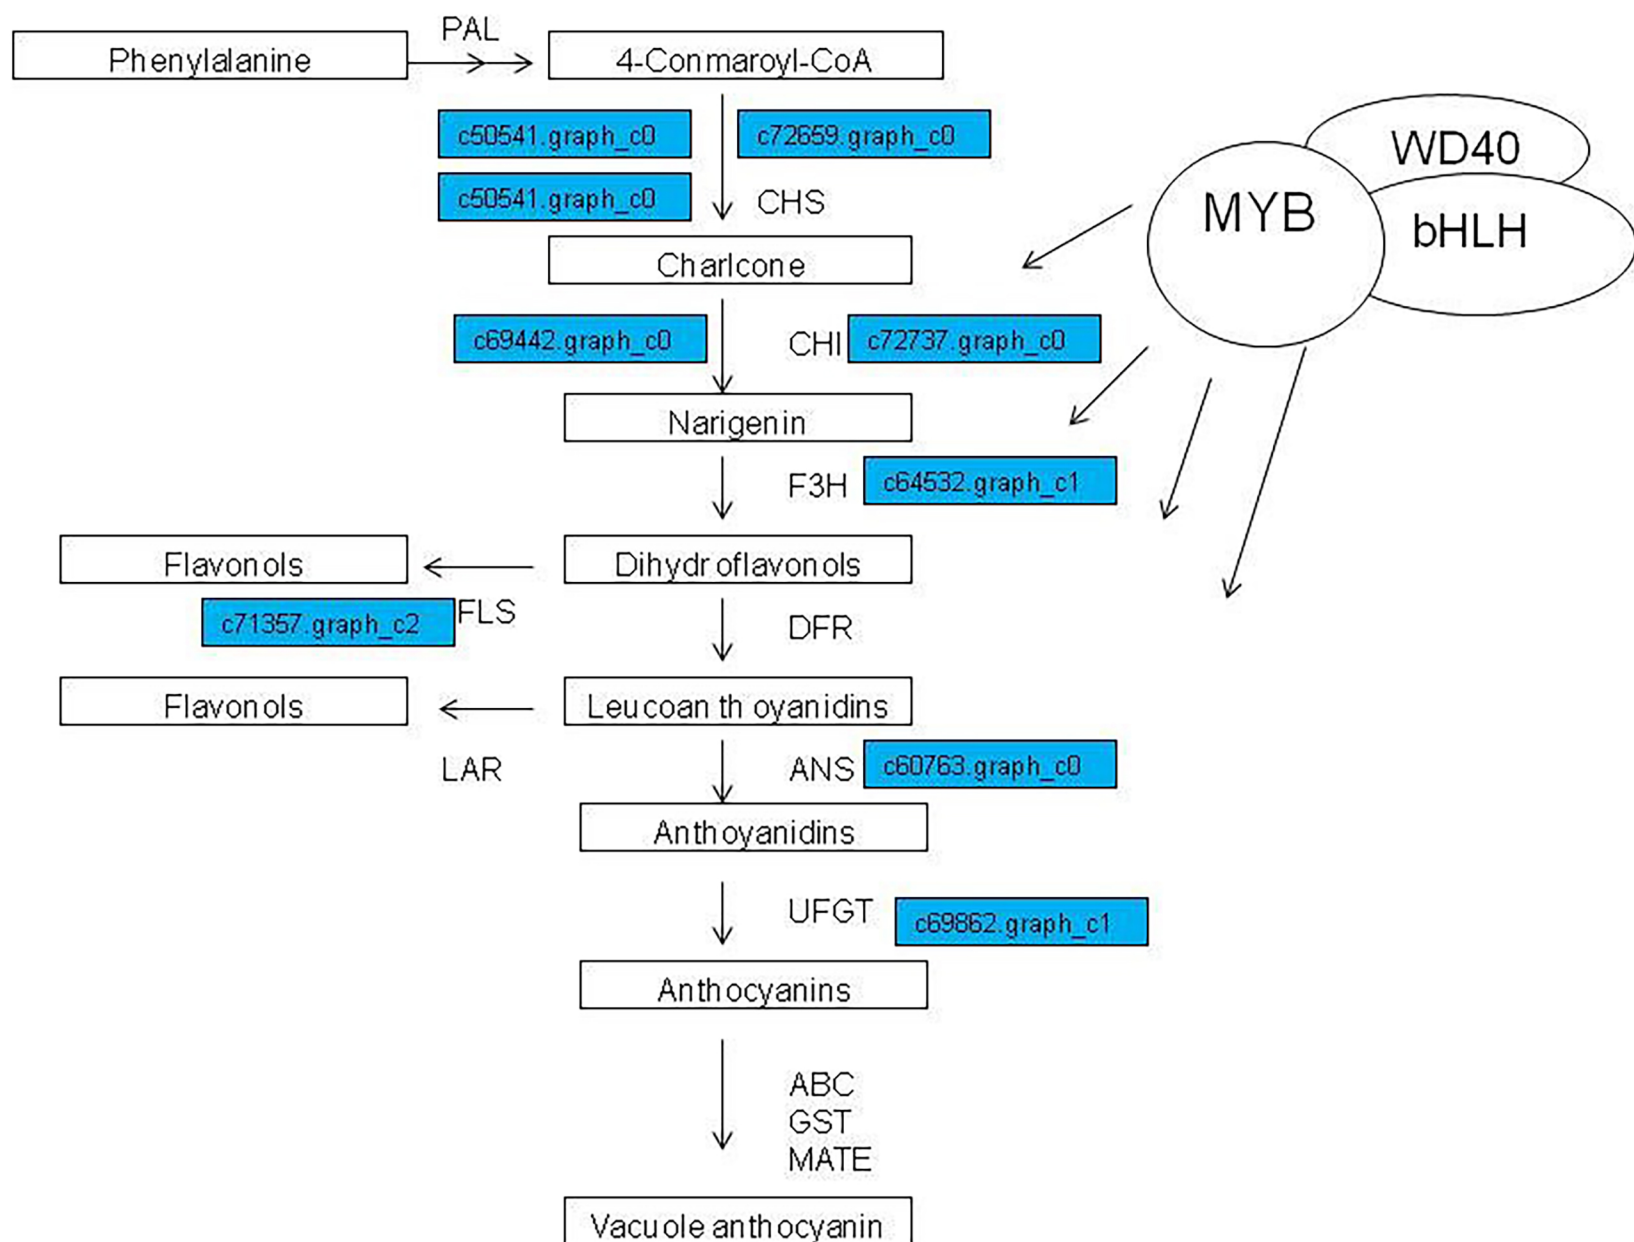

Supplement: Figure_S5.pdf [file Figure_S5.pdf]
