# Supplementary material for: Comprehensive transcriptome analysis of reference genes for fruit development of Euscaphis konishii
Source: PeerJ journal article supplement (doi:10.7717/peerj.8474), 2020-02-11

**A**

1000

750

500

100

Marker

Root

Leaf

Branch

Fruit

**B**

1000

750

500

100

Marker

Root

Leaf

Branch

Fruit

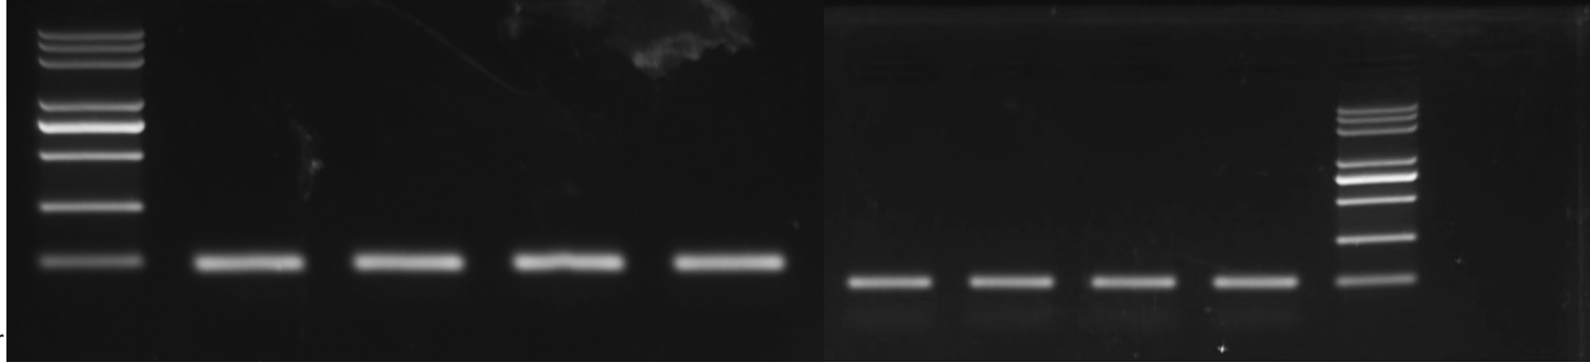

Supplement: Figure_S7.pdf [file Figure_S7.pdf]
