# Supplementary material for: Comprehensive transcriptome analysis of reference genes for fruit development of Euscaphis konishii
Source: PeerJ. 2020 Feb 11;8:e8474. doi: 10.7717/peerj.8474 (PMC7020815; doi:10.7717/peerj.8474)
Supplement: Supplemental Information 8 [file peerj-08-8474-s008.xls]

## Sheet: FKPM≥5,VC≤02.FC≤0.2
Table S1 FPKM values of 1131 genes covering transcriptomes data
#ID	T01_FPKM	T02_FPKM	T03_FPKM	T04_FPKM	T05_FPKM	T06_FPKM	T07_FPKM	T08_FPKM	T09_FPKM	mean	SD	VC	T01_T02_T03_vs_T04_T05_T06_DESeq_log2FC	FC-1	T01_T02_T03_vs_T07_T08_T09_DESeq_log2FC	FC_2	T04_T05_T06_vs_T07_T08_T09_DESeq_log2FC	FC-3	COG_class	COG_class_annotation	GO_annotation	KEGG_annotation	KOG_class	KOG_class_annotation	Pfam_annotation	Swissprot_annotation	eggNOG_class	eggNOG_class_annotation	nr_annotation	GO_second_level_annotation	KEGG_pathway_annotation	SSR_SSR_nr	SSR_SSR_type	SSR_SSR	SSR_Size	SSR_SSR_Start	SSR_SSR_End	SSR_FPr1(5'-3')	SSR_Tm_1F	SSR_Size_1F	SSR_RPr1(5'-3')	SSR_Tm_1R	SSR_Size_1R	SSR_PSize1	SSR_PStart1	SSR_PEnd1F	SSR_Pr2(5'-3')	SSR_Tm_2F	SSR_FSize_2F
c64981.graph_c0	14.97	13.36	11.95	15.22	13.5	16.21	10.46	16.67	16.96	14.3667	2.09198	0.145614	0.155043	0.155043	0.199692	0.199692	0.0565326	0.0565326	[O]	Posttranslational modification, protein turnover, chaperones	Biological Process: iron-sulfur cluster assembly (GO:0016226);;	K09015|4.26363e-107|pop:POPTR_0003s08810g|hypothetical protein; K09015 Fe-S cluster assembly protein SufD (A)	--	--	Uncharacterized protein family (UPF0051);; Uncharacterized protein family (UPF0051)	Protein ABCI7, chloroplastic (Precursor) GN=F5D14.28 OS=Arabidopsis thaliana (Mouse-ear cress) PE=1 SV=1	S	Function unknown	hypothetical protein POPTR_0003s08810g, partial [Populus trichocarpa]	biological process: metabolic process (GO:0008152);; biological process: cellular component organization or biogenesis (GO:0071840)	--	--	--	--	--	--	--	--	--	--	--	--	--	--	--	--	--	--	--
c70083.graph_c1	19.62	23.94	16.75	18.99	19.94	19.05	15.03	18.04	15.58	18.5489	2.52288	0.136012	-0.017088	0.017088	-0.199526	0.199526	-0.171117	0.171117	[M]	Cell wall/membrane/envelope biogenesis	Biological Process: sucrose metabolic process (GO:0005985);; Biological Process: biosynthetic process (GO:0009058);; Molecular Function: sucrose synthase activity (GO:0016157);;	K00695|2.89884e-34|vvi:100267606|sucrose synthase 2; K00695 sucrose synthase [EC:2.4.1.13] (A)	[M]	Cell wall/membrane/envelope biogenesis	Sucrose synthase	Sucrose synthase 2 GN=SUS2 OS=Pisum sativum (Garden pea) PE=2 SV=1	M	Cell wall/membrane/envelope biogenesis	Sucrose synthase, partial [Rhododendron simsii]	biological process: metabolic process (GO:0008152);; biological process: cellular process (GO:0009987);; biological process: single-organism process (GO:0044699);; molecular function: catalytic activity (GO:0003824)	Starch and sucrose metabolism (ko00500)	4	p1	(T)12	12	1607	1618	TGAGCCAAAGTTCATGGGAT	60.461	20	CCAAGCAGTCAAAGAGGCAT	60.397	20	254	1414	1667	TGAGCCAAAGTTCATGGGAT	60.461	20
c61426.graph_c0	27.08	27.18	22.23	19.42	25.78	21.16	18.22	22.18	21.4	22.7389	3.05704	0.134441	-0.182453	0.182453	-0.199468	0.199468	-0.00757563	0.00757563	--	--	--	--	[R]	General function prediction only	Kelch motif;; Kelch motif;; Galactose oxidase, central domain;; F-box domain	F-box/kelch-repeat protein OR23 GN=OR23 OS=Arabidopsis thaliana (Mouse-ear cress) PE=2 SV=1	R	General function prediction only	hypothetical protein PRUPE_ppa006564mg [Prunus persica]	--	--	--	--	--	--	--	--	--	--	--	--	--	--	--	--	--	--	--	--
c67221.graph_c1	7.92	9.83	9.69	7.83	7.76	10.12	7.81	6.47	7.6	8.33667	1.16948	0.140282	-0.0284618	0.0284618	-0.199345	0.199345	-0.160134	0.160134	--	--	--	--	[R]	General function prediction only	PPR repeat family;; PPR repeat;; PPR repeat;; Pentatricopeptide repeat domain;; Tetratricopeptide repeat;; Protein of unknown function (DUF620)	Pentatricopeptide repeat-containing protein At4g36680, mitochondrial (Precursor) GN=At4g36680 OS=Arabidopsis thaliana (Mouse-ear cress) PE=2 SV=1	R	General function prediction only	PREDICTED: pentatricopeptide repeat-containing protein At4g36680, mitochondrial [Vitis vinifera]	--	--	2	p6	(GGGAGA)5	30	2870	2899	TCGGATGAGAGTGGAGAGGT	59.792	20	GCATTGCTCGGATCTCACTT	60.37	20	243	2703	2945	GAGGTATTTAGCAGTGGCGG	59.73	20
c65689.graph_c3	39.69	35.02	30.24	38.05	36.07	39.14	36.42	34.86	38.98	36.4967	2.78802	0.076391	0.176975	0.176975	0.198836	0.198836	0.0324971	0.0324971	[I]	Lipid transport and metabolism	Molecular Function: phosphatidate cytidylyltransferase activity (GO:0004605);; Cellular Component: integral component of membrane (GO:0016021);; Biological Process: CDP-diacylglycerol biosynthetic process (GO:0016024);;	K00981|0|vvi:100854082|phosphatidate cytidylyltransferase; K00981 phosphatidate cytidylyltransferase [EC:2.7.7.41] (A)	[I]	Lipid transport and metabolism	Cytidylyltransferase family	Phosphatidate cytidylyltransferase GN=CDS1 OS=Solanum tuberosum (Potato) PE=2 SV=1	I	Lipid transport and metabolism	PREDICTED: phosphatidate cytidylyltransferase [Vitis vinifera]	biological process: metabolic process (GO:0008152);; molecular function: catalytic activity (GO:0003824);; cellular component: membrane (GO:0016020);; cellular component: membrane part (GO:0044425);; biological process: cellular process (GO:0009987);; biological process: single-organism process (GO:0044699)	Glycerophospholipid metabolism (ko00564);; Phosphatidylinositol signaling system (ko04070)	1	p2	(GA)6	12	2468	2479	TCCTTTTGCATGGCTCTTCT	59.955	20	TCAAAACCGTCCTCATCTCC	60.05	20	157	2360	2516	TCCTTTTGCATGGCTCTTCT	59.955	20
c68634.graph_c1	39.05	35.51	34.47	29.59	36.85	34.88	29.49	33.49	28.43	33.5289	3.43149	0.102344	-0.0939682	0.0939682	-0.198781	0.198781	-0.0959214	0.0959214	[T]	Signal transduction mechanisms	Molecular Function: phosphoprotein phosphatase activity (GO:0004721);; Cellular Component: nucleus (GO:0005634);; Cellular Component: cytoplasm (GO:0005737);; Biological Process: negative regulation of flower development (GO:0009910);; Molecular Function: metal ion binding (GO:0046872);;	K15498|7.85475e-142|fve:101305656|phytochrome-associated serine/threonine-protein phosphatase-like; K15498 serine/threonine-protein phosphatase 6 catalytic subunit [EC:3.1.3.16] (A)	[DT]	--	Calcineurin-like phosphoesterase;; Calcineurin-like phosphoesterase	Phytochrome-associated serine/threonine-protein phosphatase GN=FYPP OS=Pisum sativum (Garden pea) PE=1 SV=1	T	Signal transduction mechanisms	PREDICTED: uncharacterized protein LOC100820006 isoform X1 [Glycine max]	biological process: metabolic process (GO:0008152);; biological process: cellular process (GO:0009987);; molecular function: catalytic activity (GO:0003824);; cellular component: cell (GO:0005623);; cellular component: organelle (GO:0043226);; cellular component: cell part (GO:0044464);; biological process: biological regulation (GO:0065007);; molecular function: binding (GO:0005488)	--	4	p2	(CT)6	12	4095	4106	GCTAGGCTGCTGCTTTTGAA	60.792	20	CAAAATCCAAGATGGTGCAA	59.518	20	208	4017	4224	ATCCAAGCATTGTGATCGGT	60.348	20
c58186.graph_c1	10.59	9.29	10.09	9.99	11.85	10.98	10.41	10.42	10.7	10.48	0.667017	0.0636466	0.178788	0.178788	0.198584	0.198584	0.0284404	0.0284404	--	--	Biological Process: MAPK cascade (GO:0000165);; Biological Process: respiratory burst involved in defense response (GO:0002679);; Biological Process: protein targeting to membrane (GO:0006612);; Biological Process: membrane fusion (GO:0006944);; Biological Process: systemic acquired resistance, salicylic acid mediated signaling pathway (GO:0009862);; Biological Process: jasmonic acid mediated sig…	--	--	--	MAC/Perforin domain	MACPF domain-containing protein CAD1 GN=CAD1 OS=Arabidopsis thaliana (Mouse-ear cress) PE=2 SV=1	S	Function unknown	PREDICTED: MACPF domain-containing protein CAD1-like isoform X1 [Vitis vinifera]	biological process: metabolic process (GO:0008152);; biological process: cellular process (GO:0009987);; biological process: signaling (GO:0023052);; biological process: single-organism process (GO:0044699);; biological process: response to stimulus (GO:0050896);; biological process: biological regulation (GO:0065007);; biological process: immune system process (GO:0002376);; biological process: …	--	--	--	--	--	--	--	--	--	--	--	--	--	--	--	--	--	--	--
c54867.graph_c0	28.44	27.14	24.87	24.75	23.11	23.19	25.06	19.65	19.91	24.0133	2.77115	0.1154	-0.132785	0.132785	-0.198525	0.198525	-0.0559196	0.0559196	--	--	--	--	--	--	--	--	S	Function unknown	hypothetical protein L484_010701 [Morus notabilis]	--	--	--	--	--	--	--	--	--	--	--	--	--	--	--	--	--	--	--	--
c62648.graph_c0	20.27	14.03	17.74	19.49	14.58	20.38	22.63	18.32	19.46	18.5444	2.61545	0.141037	0.0113241	0.0113241	0.198176	0.198176	0.19708	0.19708	--	--	Cellular Component: Golgi apparatus (GO:0005794);; Cellular Component: plasma membrane (GO:0005886);; Molecular Function: protein transporter activity (GO:0008565);; Biological Process: protein transport (GO:0015031);;	K09481|5.16526e-24|pvu:PHAVU_003G173500g|hypothetical protein; K09481 protein transport protein SEC61 subunit beta (A)	[O]	Posttranslational modification, protein turnover, chaperones	Sec61beta family	Protein transport protein Sec61 subunit beta GN=At2g45070 OS=Arabidopsis thaliana (Mouse-ear cress) PE=1 SV=1	O	Posttranslational modification, protein turnover, chaperones	PREDICTED: protein transport protein Sec61 subunit beta-like [Nelumbo nucifera]	cellular component: cell (GO:0005623);; cellular component: organelle (GO:0043226);; cellular component: cell part (GO:0044464);; cellular component: membrane (GO:0016020);; biological process: localization (GO:0051179);; molecular function: transporter activity (GO:0005215)	Protein export (ko03060);; Protein processing in endoplasmic reticulum (ko04141);; Phagosome (ko04145)	--	--	--	--	--	--	--	--	--	--	--	--	--	--	--	--	--	--
c65728.graph_c0	210.77	198.68	215.18	182.48	184.24	193.89	182.69	163.46	154.34	187.303	18.8845	0.100823	-0.108223	0.108223	-0.19812	0.19812	-0.0803292	0.0803292	[C]	Energy production and conversion	Molecular Function: copper ion binding (GO:0005507);; Cellular Component: cell wall (GO:0005618);; Cellular Component: mitochondrion (GO:0005739);; Biological Process: tricarboxylic acid cycle (GO:0006099);; Biological Process: malate metabolic process (GO:0006108);; Biological Process: response to cold (GO:0009409);; Cellular Component: chloroplast (GO:0009507);; Biological Process: response to …	K00026|0|rcu:RCOM_1520380|malate dehydrogenase, putative (EC:1.1.1.37); K00026 malate dehydrogenase [EC:1.1.1.37] (A)	[C]	Energy production and conversion	lactate/malate dehydrogenase, NAD binding domain;; lactate/malate dehydrogenase, alpha/beta C-terminal domain;; 3-beta hydroxysteroid dehydrogenase/isomerase family	Malate dehydrogenase, mitochondrial (Precursor) GN=MMDH OS=Citrullus lanatus (Watermelon) PE=1 SV=1	C	Energy production and conversion	hypothetical protein JCGZ_14703 [Jatropha curcas]	molecular function: binding (GO:0005488);; cellular component: cell (GO:0005623);; cellular component: cell part (GO:0044464);; cellular component: organelle (GO:0043226);; biological process: metabolic process (GO:0008152);; biological process: cellular process (GO:0009987);; biological process: single-organism process (GO:0044699);; biological process: response to stimulus (GO:0050896);; cellul…	Citrate cycle (TCA cycle) (ko00020);; Cysteine and methionine metabolism (ko00270);; Pyruvate metabolism (ko00620);; Glyoxylate and dicarboxylate metabolism (ko00630);; Carbon fixation in photosynthetic organisms (ko00710);; Carbon metabolism (ko01200)	--	--	--	--	--	--	--	--	--	--	--	--	--	--	--	--	--	--
c70409.graph_c0	54.82	62.02	68.27	61.11	60.31	67.2	66.17	62.03	64.96	62.9878	3.92887	0.0623751	0.0826186	0.0826186	0.197919	0.197919	0.125563	0.125563	[LKJ]	--	Molecular Function: nucleic acid binding (GO:0003676);; Molecular Function: ATP binding (GO:0005524);; Molecular Function: ATP-dependent helicase activity (GO:0008026);;	K11594|0|tcc:TCM_040183|Dead box ATP-dependent RNA helicase, putative isoform 1; K11594 ATP-dependent RNA helicase DDX3X [EC:3.6.4.13] (A)	[A]	RNA processing and modification	DEAD/DEAH box helicase;; Helicase conserved C-terminal domain	DEAD-box ATP-dependent RNA helicase 37 GN=RH37 OS=Arabidopsis thaliana (Mouse-ear cress) PE=2 SV=2	A	RNA processing and modification	hypothetical protein JCGZ_21034 [Jatropha curcas]	molecular function: binding (GO:0005488);; biological process: metabolic process (GO:0008152);; biological process: cellular process (GO:0009987);; biological process: single-organism process (GO:0044699);; molecular function: catalytic activity (GO:0003824)	--	1	p1	(A)13	13	3409	3421	AAGACGAGGTGGAGATGGTG	60.112	20	TCAAATTCAACTGGATGGGTC	59.782	21	212	3357	3568	GAGGTGGAGATGGTGGGTAA	59.779	20
c71620.graph_c2	46.03	43.79	52.92	41.15	40.12	38.22	42.62	30.3	35.15	41.1444	6.0996	0.148248	-0.186916	0.186916	-0.197865	0.197865	-0.00128635	0.00128635	--	--	--	K17925|0|pper:PRUPE_ppa000718mg|hypothetical protein; K17925 sorting nexin-13 (A)	[ZUD]	--	PX domain;; Sorting nexin C terminal	--	Z	Cytoskeleton	hypothetical protein PRUPE_ppa000718mg [Prunus persica]	--	--	1	p1	(T)11	11	2533	2543	TCAACTTTTTCCCGTCTCCTT	60.096	21	GCTTGTAGCTCGCGAAGATT	59.758	20	244	2423	2666	TCAACTTTTTCCCGTCTCCTT	60.096	21
c66798.graph_c0	47.25	46.48	37.08	48.99	49.83	48.22	46.45	52.8	47.7	47.2	4.03139	0.0854109	0.130107	0.130107	0.197451	0.197451	0.0778217	0.0778217	--	--	Biological Process: isopentenyl diphosphate biosynthetic process, methylerythritol 4-phosphate pathway (GO:0019288);;	--	--	--	--	--	S	Function unknown	unknown protein [Arabidopsis thaliana]	biological process: metabolic process (GO:0008152);; biological process: cellular process (GO:0009987);; biological process: single-organism process (GO:0044699)	--	2	p2	(GT)7	14	2627	2640	GTCCAATGAGCTTTGCCACT	60.263	20	AAAAACCAGTATTGCACCGC	60.003	20	251	2510	2760	AGTCCAATGAGCTTTGCCAC	60.263	20
c66288.graph_c1	149.03	172.63	185.92	132.49	161.75	161.02	166.49	165.61	158.34	161.476	14.0213	0.086832	0.147721	0.147721	0.197123	0.197123	0.0587783	0.0587783	--	--	Molecular Function: RNA binding (GO:0003723);; Molecular Function: ubiquitin thiolesterase activity (GO:0004221);; Cellular Component: cytosol (GO:0005829);; Biological Process: protein import into nucleus (GO:0006606);;	K13210|2.47214e-127|vvi:100259454|far upstream element-binding protein 2; K13210 far upstream element-binding protein (A)	[A]	RNA processing and modification	KH domain;; KH domain;; KH domain;; KH domain	--	A	RNA processing and modification	unnamed protein product [Vitis vinifera]	molecular function: binding (GO:0005488);; biological process: metabolic process (GO:0008152);; molecular function: catalytic activity (GO:0003824);; cellular component: cell (GO:0005623);; cellular component: cell part (GO:0044464);; biological process: single-organism process (GO:0044699);; biological process: localization (GO:0051179)	--	--	--	--	--	--	--	--	--	--	--	--	--	--	--	--	--	--	--
c67617.graph_c0	10.84	10.63	10.13	8.69	9.31	9.35	8.72	7.11	8.66	9.27111	1.09233	0.117821	-0.12635	0.12635	-0.196911	0.196911	-0.0609114	0.0609114	--	--	Molecular Function: CAAX-protein geranylgeranyltransferase activity (GO:0004662);; Cellular Component: CAAX-protein geranylgeranyltransferase complex (GO:0005953);; Biological Process: response to water deprivation (GO:0009414);; Biological Process: response to auxin (GO:0009733);; Biological Process: negative regulation of abscisic acid-activated signaling pathway (GO:0009788);; Biological Proce…	K11713|1.78206e-75|tcc:TCM_042787|Prenyltransferase family protein; K11713 geranylgeranyl transferase type-1 subunit beta [EC:2.5.1.59] (A)	[O]	Posttranslational modification, protein turnover, chaperones	Prenyltransferase and squalene oxidase repeat	Geranylgeranyl transferase type-1 subunit beta GN=F12L6 OS=Arabidopsis thaliana (Mouse-ear cress) PE=1 SV=1	O	Posttranslational modification, protein turnover, chaperones	Geranylgeranyl transferase type-1 subunit beta [Morus notabilis]	biological process: metabolic process (GO:0008152);; molecular function: catalytic activity (GO:0003824);; cellular component: cell (GO:0005623);; cellular component: macromolecular complex (GO:0032991);; cellular component: cell part (GO:0044464);; biological process: response to stimulus (GO:0050896);; biological process: biological regulation (GO:0065007);; biological process: cellular process…	--	3	p1	(T)11	11	2130	2140	TCCCTTCCAATTACCACCAA	60.162	20	GTTGCACCACCTGTGACACT	59.63	20	203	2006	2208	TTCCCTTCCAATTACCACCA	60.162	20
c64149.graph_c2	11.2	11.97	13.95	9.92	12.74	9.55	9.82	8.65	12.45	11.1389	1.66078	0.149097	-0.158827	0.158827	-0.196866	0.196866	-0.0297805	0.0297805	--	--	Molecular Function: zinc ion binding (GO:0008270);;	--	[O]	Posttranslational modification, protein turnover, chaperones	--	Probable E3 ubiquitin-protein ligase LUL4 GN=F28L1.8 OS=Arabidopsis thaliana (Mouse-ear cress) PE=2 SV=1	O	Posttranslational modification, protein turnover, chaperones	RING/U-box superfamily protein isoform 2, partial [Theobroma cacao]	molecular function: binding (GO:0005488)	--	--	--	--	--	--	--	--	--	--	--	--	--	--	--	--	--	--	--
c66165.graph_c0	6.23	8.8	9.35	7.27	10.67	8.19	6.66	9.9	9.39	8.49556	1.43065	0.1684	0.134233	0.134233	0.19678	0.19678	0.0718652	0.0718652	--	--	Biological Process: DNA damage checkpoint (GO:0000077);; Biological Process: regulation of DNA repair (GO:0006282);; Molecular Function: exodeoxyribonuclease III activity (GO:0008853);; Cellular Component: checkpoint clamp complex (GO:0030896);;	K10994|0|vvi:100264904|cell cycle checkpoint control protein RAD9A; K10994 cell cycle checkpoint control protein RAD9A [EC:3.1.11.2] (A)	[DL]	--	Rad9	--	L	Replication, recombination and repair	PREDICTED: cell cycle checkpoint control protein RAD9A [Vitis vinifera]	biological process: cellular process (GO:0009987);; biological process: single-organism process (GO:0044699);; biological process: response to stimulus (GO:0050896);; biological process: biological regulation (GO:0065007);; biological process: metabolic process (GO:0008152);; molecular function: catalytic activity (GO:0003824);; cellular component: cell (GO:0005623);; cellular component: membrane…	--	--	--	--	--	--	--	--	--	--	--	--	--	--	--	--	--	--	--
c62335.graph_c0	12.23	10.61	8.7	13.06	14.2	10.23	12.11	9.94	10.75	11.3144	1.61795	0.142999	0.191528	0.191528	0.195879	0.195879	0.0137936	0.0137936	--	--	--	--	[T]	Signal transduction mechanisms	Protein of unknown function (DUF3735);; Abscisic acid G-protein coupled receptor;; Abscisic acid G-protein coupled receptor	GPCR-type G protein 2 GN=GTG2 OS=Arabidopsis thaliana (Mouse-ear cress) PE=1 SV=2	T	Signal transduction mechanisms	hypothetical protein JCGZ_02568 [Jatropha curcas]	--	--	--	--	--	--	--	--	--	--	--	--	--	--	--	--	--	--	--	--
c61644.graph_c0	7.54	8.94	8.94	8.9	6.78	9.86	8.61	9.78	9.09	8.71556	0.934358	0.107206	0.070146	0.070146	0.195498	0.195498	0.137843	0.137843	--	--	--	--	--	--	--	--	--	--	--	--	--	--	--	--	--	--	--	--	--	--	--	--	--	--	--	--	--	--	--
c60121.graph_c0	11.32	13.01	15.98	10.24	13.11	10.32	11.92	9.15	9.99	11.6711	1.99083	0.170577	-0.175696	0.175696	-0.195408	0.195408	-0.0123549	0.0123549	[O]	Posttranslational modification, protein turnover, chaperones	Molecular Function: ubiquitin-protein transferase activity (GO:0004842);; Biological Process: protein ubiquitination (GO:0016567);;	K06689|2.41538e-13|cic:CICLE_v10006155mg|hypothetical protein; K06689 ubiquitin-conjugating enzyme E2 D/E [EC:6.3.2.19] (A)	[O]	Posttranslational modification, protein turnover, chaperones	--	Ubiquitin-conjugating enzyme E2 5A GN=OsJ_02884 OS=Oryza sativa subsp. japonica (Rice) PE=2 SV=1	O	Posttranslational modification, protein turnover, chaperones	unnamed protein product [Coffea canephora]	biological process: metabolic process (GO:0008152);; biological process: cellular process (GO:0009987);; molecular function: catalytic activity (GO:0003824)	Ubiquitin mediated proteolysis (ko04120);; Protein processing in endoplasmic reticulum (ko04141)	--	--	--	--	--	--	--	--	--	--	--	--	--	--	--	--	--	--
c61350.graph_c0	19.68	19.07	18.07	17.88	13.51	16.84	17.21	13.77	13.66	16.6322	2.26096	0.135939	-0.19437	0.19437	-0.195287	0.195287	0.0100893	0.0100893	[CE]	--	Molecular Function: magnesium ion binding (GO:0000287);; Molecular Function: 3-isopropylmalate dehydrogenase activity (GO:0003862);; Biological Process: ubiquinone biosynthetic process (GO:0006744);; Biological Process: leucine biosynthetic process (GO:0009098);; Cellular Component: chloroplast stroma (GO:0009570);; Cellular Component: chloroplast envelope (GO:0009941);; Molecular Function: NAD b…	K00052|0|rcu:RCOM_0011000|3-isopropylmalate dehydrogenase, putative (EC:1.1.1.85); K00052 3-isopropylmalate dehydrogenase [EC:1.1.1.85] (A)	[E]	Amino acid transport and metabolism	Isocitrate/isopropylmalate dehydrogenase	3-isopropylmalate dehydrogenase 2, chloroplastic (Precursor) GN=T21F11.11 OS=Arabidopsis thaliana (Mouse-ear cress) PE=1 SV=1	E	Amino acid transport and metabolism	hypothetical protein JCGZ_06072 [Jatropha curcas]	molecular function: binding (GO:0005488);; biological process: metabolic process (GO:0008152);; biological process: single-organism process (GO:0044699);; molecular function: catalytic activity (GO:0003824);; biological process: cellular process (GO:0009987);; cellular component: cell (GO:0005623);; cellular component: organelle (GO:0043226);; cellular component: organelle part (GO:0044422);; cel…	Valine, leucine and isoleucine biosynthesis (ko00290);; C5-Branched dibasic acid metabolism (ko00660);; 2-Oxocarboxylic acid metabolism (ko01210);; Biosynthesis of amino acids (ko01230)	1	p1	(A)15	15	482	496	GCACCATCAATTCCATGTCA	60.339	20	TCCCGAACAATCTTCACCAT	60.317	20	272	307	578	GCACCATCAATTCCATGTCA	60.339	20
c60119.graph_c1	19.4	27.32	31.7	24.58	30.78	26.43	25.06	30.26	27.89	27.0467	3.58369	0.1325	0.0911193	0.0911193	0.195174	0.195174	0.113564	0.113564	--	--	Molecular Function: kinase activity (GO:0016301);; Biological Process: phosphorylation (GO:0016310);; Molecular Function: phosphotransferase activity, alcohol group as acceptor (GO:0016773);;	K08874|0|vvi:100255847|TRRAP; transcription-associated protein 1; K08874 transformation/transcription domain-associated protein (A)	[TBLD]	--	FAT domain;; Phosphatidylinositol 3- and 4-kinase;; FATC domain	--	T	Signal transduction mechanisms	PREDICTED: transcription-associated protein 1 [Vitis vinifera]	biological process: metabolic process (GO:0008152);; biological process: cellular process (GO:0009987);; molecular function: catalytic activity (GO:0003824)	--	--	--	--	--	--	--	--	--	--	--	--	--	--	--	--	--	--	--
c71919.graph_c0	16.01	12.6	12.08	13.38	10.37	13.84	14	8.93	12.58	12.6433	1.9559	0.154698	0.151593	0.151593	0.194704	0.194704	0.053428	0.053428	[S]	Function unknown	Molecular Function: binding (GO:0005488);;	--	[R]	General function prediction only	Protein of unknown function (DUF1365);; Protein of unknown function (DUF1365)	Endonuclease OS=Nicotiana tabacum (Common tobacco) PE=2 SV=1	S	Function unknown	hypothetical protein VITISV_010115 [Vitis vinifera]	molecular function: binding (GO:0005488)	--	2	p4	(TACA)5	20	2610	2629	TCCATGGATCACTAACTCCCA	60.324	21	TCCATTAGTCTCATCGTCGAGTT	60.144	23	243	2514	2756	TCCATGGATCACTAACTCCCA	60.324	21
c67532.graph_c0	27.56	22.28	25.04	24.14	23.68	27.01	26.61	25.27	26.73	25.3689	1.66363	0.0655774	0.0252676	0.0252676	0.194341	0.194341	0.17913	0.17913	[J]	Translation, ribosomal structure and biogenesis	Molecular Function: nucleic acid binding (GO:0003676);; Molecular Function: aminopeptidase activity (GO:0004177);; Cellular Component: cytosol (GO:0005829);; Biological Process: proteolysis (GO:0006508);; Molecular Function: metalloexopeptidase activity (GO:0008235);; Molecular Function: zinc ion binding (GO:0008270);; Biological Process: vernalization response (GO:0010048);; Biological Process: …	K01265|1.66197e-73|cam:101510453|methionine aminopeptidase 1A-like; K01265 methionyl aminopeptidase [EC:3.4.11.18] (A)	[O]	Posttranslational modification, protein turnover, chaperones	Metallopeptidase family M24	Methionine aminopeptidase 1A {ECO:0000255|HAMAP-Rule:MF_03174} GN=MAP1A OS=Arabidopsis thaliana (Mouse-ear cress) PE=1 SV=1	O	Posttranslational modification, protein turnover, chaperones	hypothetical protein CISIN_1g0158381mg, partial [Citrus sinensis]	molecular function: binding (GO:0005488);; biological process: metabolic process (GO:0008152);; molecular function: catalytic activity (GO:0003824);; cellular component: cell (GO:0005623);; cellular component: cell part (GO:0044464);; biological process: response to stimulus (GO:0050896);; biological process: cellular process (GO:0009987);; biological process: multicellular organismal process (GO…	--	1	p1	(T)11	11	1464	1474	TTTTCAAAAACCAAGGGACG	59.947	20	CACGGTTGCCTCTCTCTTTC	59.989	20	219	1323	1541	TTTTCAAAAACCAAGGGACG	59.947	20
c72474.graph_c1	31.45	24.64	23.59	28.08	26.12	29.36	26.67	25.57	27.85	27.0367	2.29431	0.0848593	0.184518	0.184518	0.194064	0.194064	0.0191548	0.0191548	[T]	Signal transduction mechanisms	Biological Process: activation of MAPKK activity (GO:0000186);; Molecular Function: MAP kinase kinase kinase activity (GO:0004709);; Molecular Function: protein serine/threonine phosphatase activity (GO:0004722);; Molecular Function: ATP binding (GO:0005524);;	--	[T]	Signal transduction mechanisms	Protein phosphatase 2C;; Protein kinase domain;; Protein tyrosine kinase;; Kinase-like	Probable protein phosphatase 2C 4 GN=OSJNBa0062A24.20 OS=Oryza sativa subsp. japonica (Rice) PE=2 SV=1	T	Signal transduction mechanisms	PREDICTED: protein kinase and PP2C-like domain-containing protein [Vitis vinifera]	biological process: biological regulation (GO:0065007);; biological process: metabolic process (GO:0008152);; biological process: cellular process (GO:0009987);; biological process: signaling (GO:0023052);; biological process: single-organism process (GO:0044699);; biological process: response to stimulus (GO:0050896);; molecular function: catalytic activity (GO:0003824);; molecular function: mol…	--	--	--	--	--	--	--	--	--	--	--	--	--	--	--	--	--	--	--
c62507.graph_c0	7.37	8.46	7.39	7.55	9.07	9.08	8.42	8.78	7.29	8.15667	0.711993	0.0872896	0.186282	0.186282	0.19398	0.19398	0.0175196	0.0175196	--	--	Cellular Component: exocyst (GO:0000145);; Biological Process: vesicle docking involved in exocytosis (GO:0006904);;	--	[U]	Intracellular trafficking, secretion, and vesicular transport	Exocyst complex subunit Sec15-like	Exocyst complex component SEC15A GN=SEC15A OS=Arabidopsis thaliana (Mouse-ear cress) PE=3 SV=2	U	Intracellular trafficking, secretion, and vesicular transport	hypothetical protein JCGZ_26524 [Jatropha curcas]	cellular component: cell (GO:0005623);; cellular component: macromolecular complex (GO:0032991);; cellular component: cell part (GO:0044464);; biological process: cellular process (GO:0009987);; biological process: single-organism process (GO:0044699);; biological process: localization (GO:0051179)	--	--	--	--	--	--	--	--	--	--	--	--	--	--	--	--	--	--	--
c64674.graph_c0	24.79	30.36	25.24	26.58	29.52	31.3	28.95	27.53	28.2	28.0522	2.10415	0.0750083	0.160823	0.160823	0.193889	0.193889	0.0436194	0.0436194	[R]	General function prediction only	Molecular Function: nucleotide binding (GO:0000166);; Cellular Component: cytosol (GO:0005829);; Cellular Component: plasmodesma (GO:0009506);;	K14018|0|pper:PRUPE_ppa001837mg|hypothetical protein; K14018 phospholipase A-2-activating protein (A)	[I]	Lipid transport and metabolism	PUL domain;; WD domain, G-beta repeat;; PFU (PLAA family ubiquitin binding)	Dynein assembly factor with WDR repeat domains 1 GN=DAW1 OS=Chlamydomonas reinhardtii (Chlamydomonas smithii) PE=1 SV=1	I	Lipid transport and metabolism	hypothetical protein PRUPE_ppa001837mg [Prunus persica]	molecular function: binding (GO:0005488);; cellular component: cell (GO:0005623);; cellular component: cell part (GO:0044464);; cellular component: cell junction (GO:0030054);; cellular component: symplast (GO:0055044)	Protein processing in endoplasmic reticulum (ko04141)	1	p1	(A)13	13	668	680	ATGATTCTCAAGCCCACAGG	60.073	20	TGGAGGCAGTTTCTGCTTTT	59.993	20	142	602	743	TGATGATTCTCAAGCCCACA	60.201	20
c54203.graph_c0	26.91	34.3	28.56	32.34	32.14	27.48	30.55	40.37	24.5	30.7944	4.45878	0.144792	0.0711942	0.0711942	0.193888	0.193888	0.13381	0.13381	[R]	General function prediction only	Molecular Function: nucleotide binding (GO:0000166);; Molecular Function: RNA binding (GO:0003723);; Cellular Component: nucleolus (GO:0005730);; Biological Process: embryo development ending in seed dormancy (GO:0009793);;	K12831|4.61593e-170|gmx:100792707|splicing factor 3B subunit 4-like; K12831 splicing factor 3B subunit 4 (A)	[A]	RNA processing and modification	RNA recognition motif. (a.k.a. RRM, RBD, or RNP domain);; RNA recognition motif (a.k.a. RRM, RBD, or RNP domain);; RNA recognition motif. (a.k.a. RRM, RBD, or RNP domain)	Polyadenylate-binding protein 2 GN=PAB2 OS=Arabidopsis thaliana (Mouse-ear cress) PE=1 SV=1	A	RNA processing and modification	PREDICTED: splicing factor 3B subunit 4-like [Glycine max]	molecular function: binding (GO:0005488);; cellular component: cell (GO:0005623);; cellular component: membrane-enclosed lumen (GO:0031974);; cellular component: organelle (GO:0043226);; cellular component: organelle part (GO:0044422);; cellular component: cell part (GO:0044464);; biological process: reproductive process (GO:0022414);; biological process: multicellular organismal process (GO:0032…	Spliceosome (ko03040)	2	p3	(GTG)5	15	1411	1425	ATTCGCGTCGTCATATCTCC	60.066	20	CCATTGGGAACGTTAATTGG	60.046	20	126	1350	1475	TCTCCTCCGTGTTATTTGGG	59.926	20
c65798.graph_c0	146.26	128.89	147.98	138.37	125.7	129.85	152.09	129.19	140.24	137.619	9.11972	0.066268	0.0226206	0.0226206	0.193719	0.193719	0.180632	0.180632	[R]	General function prediction only	Molecular Function: GTP binding (GO:0005525);; Cellular Component: endoplasmic reticulum (GO:0005783);; Cellular Component: Golgi apparatus (GO:0005794);; Biological Process: intracellular protein transport (GO:0006886);; Biological Process: vesicle-mediated transport (GO:0016192);;	K07953|9.44436e-55|csv:101221276|GTP-binding protein SAR1A-like; K07953 GTP-binding protein SAR1 [EC:3.6.5.-] (A)	[U]	Intracellular trafficking, secretion, and vesicular transport	ADP-ribosylation factor family	GTP-binding protein SAR1A GN=SAR1A OS=Arabidopsis thaliana (Mouse-ear cress) PE=2 SV=1	U	Intracellular trafficking, secretion, and vesicular transport	PREDICTED: GTP-binding protein SAR1A [Elaeis guineensis]	molecular function: binding (GO:0005488);; cellular component: cell (GO:0005623);; cellular component: organelle (GO:0043226);; cellular component: cell part (GO:0044464);; biological process: localization (GO:0051179)	Protein processing in endoplasmic reticulum (ko04141)	1	p1	(T)11	11	308	318	CATGTGGGTGTGTTCTCGTC	60.005	20	GGAAAATGGATTCCAAGAAAA	58.024	21	234	197	430	CATGTGGGTGTGTTCTCGTC	60.005	20
c68909.graph_c0	26.73	30.39	39.25	24.77	35.01	33.44	24.72	33.97	35.05	31.4811	4.83152	0.153474	0.107203	0.107203	0.193294	0.193294	0.0955398	0.0955398	--	--	--	--	--	--	--	--	S	Function unknown	hypothetical protein JCGZ_24716 [Jatropha curcas]	--	--	--	--	--	--	--	--	--	--	--	--	--	--	--	--	--	--	--	--
c61170.graph_c0	44.44	36.92	37.86	38.3	42.34	37.69	38.71	28.28	33.84	37.5978	4.37814	0.116447	-0.0172963	0.0172963	-0.193293	0.193293	-0.16795	0.16795	[T]	Signal transduction mechanisms	Cellular Component: integral component of membrane (GO:0016021);;	--	[U]	Intracellular trafficking, secretion, and vesicular transport	EXS family	Phosphate transporter PHO1-3 GN=B1423D04.17 OS=Oryza sativa subsp. japonica (Rice) PE=2 SV=1	U	Intracellular trafficking, secretion, and vesicular transport	SPX and EXS domain-containing protein 1 [Morus notabilis]	cellular component: membrane (GO:0016020);; cellular component: membrane part (GO:0044425)	--	--	--	--	--	--	--	--	--	--	--	--	--	--	--	--	--	--	--
c68342.graph_c0	71.46	79.12	72.49	70.02	76.78	75.51	79.14	79	76.8	75.5911	3.28752	0.0434908	0.0862609	0.0862609	0.192588	0.192588	0.116199	0.116199	[RTKL]	--	Molecular Function: protein serine/threonine kinase activity (GO:0004674);; Molecular Function: calcium ion binding (GO:0005509);; Molecular Function: ATP binding (GO:0005524);; Biological Process: protein phosphorylation (GO:0006468);;	K13412|3.46619e-161|pxb:103948173|calcium-dependent protein kinase 2-like; K13412 calcium-dependent protein kinase [EC:2.7.11.1] (A)	[T]	Signal transduction mechanisms	Protein kinase domain;; Protein tyrosine kinase;; EF hand;; EF-hand domain pair;; EF hand;; EF-hand domain	Calcium-dependent protein kinase OS=Daucus carota (Wild carrot) PE=2 SV=2	T	Signal transduction mechanisms	PREDICTED: calcium-dependent protein kinase 2-like [Pyrus x bretschneideri]	biological process: metabolic process (GO:0008152);; biological process: cellular process (GO:0009987);; molecular function: catalytic activity (GO:0003824);; molecular function: binding (GO:0005488)	Plant-pathogen interaction (ko04626)	4	p3	(TGG)5	15	3557	3571	GGTTTTGAGTGTTGGGTGCT	60.012	20	GATCGCAGAAATGGGTTGTT	59.939	20	185	3503	3687	TGTCTTCGTAGCCTTTGCCT	60.015	20
c71117.graph_c1	17.53	15.99	13.73	19.19	15.57	19.11	17.46	18.26	19.15	17.3322	1.78622	0.103058	0.0726443	0.0726443	0.192561	0.192561	0.130347	0.130347	--	--	--	K14977|2.17866e-43|vvi:100251394|(S)-ureidoglycine aminohydrolase-like; K14977 (S)-ureidoglycine aminohydrolase [EC:3.5.3.26] (A)	--	--	--	(S)-ureidoglycine aminohydrolase (Precursor) OS=Arabidopsis thaliana (Mouse-ear cress) PE=1 SV=1	R	General function prediction only	PREDICTED: (S)-ureidoglycine aminohydrolase-like, partial [Vitis vinifera]	--	Purine metabolism (ko00230)	2	p1	(A)11	11	2610	2620	TGGCATCTATACTTTATTTCTCGG	58.778	24	AATGGACCACATCGGTTGAT	60.057	20	232	2509	2740	TGGCATCTATACTTTATTTCTCGG	58.778	24
c65400.graph_c1	25.59	23.75	30.45	24.87	23.46	25.7	20.58	21.76	22.39	24.2833	2.72265	0.11212	-0.0985482	0.0985482	-0.192249	0.192249	-0.0835026	0.0835026	--	--	--	--	[S]	Function unknown	PPPDE putative peptidase domain	DeSI-like protein At4g17486 GN=At4g17486 OS=Arabidopsis thaliana (Mouse-ear cress) PE=2 SV=1	S	Function unknown	PPPDE thiol peptidase family protein, putative isoform 1 [Theobroma cacao]	--	--	2	p2	(AT)7	14	945	958	CGGTTAGCAGAAGTGTCCGT	60.312	20	GCAGACAACTGCACAAGGAA	60.032	20	156	870	1025	CGGTTAGCAGAAGTGTCCGT	60.312	20
c70862.graph_c0	17.05	14.73	16.44	15.14	11.95	14.07	14.61	12.98	13.4	14.4856	1.52558	0.105318	-0.181354	0.181354	-0.191676	0.191676	0.000401841	0.000401841	--	--	--	--	--	--	--	F-box/LRR-repeat protein At4g29420 GN=At4g29420 OS=Arabidopsis thaliana (Mouse-ear cress) PE=2 SV=1	R	General function prediction only	hypothetical protein JCGZ_07322 [Jatropha curcas]	--	--	1	p1	(T)11	11	961	971	ACACGGGAATGCTACGAGAC	60.142	20	AATCATGCGTTTAGCAACCC	59.967	20	265	877	1141	ACACGGGAATGCTACGAGAC	60.142	20
c64782.graph_c0	81.5	70.39	75.38	64.08	62.86	69.28	69.22	53.89	51.16	66.4178	9.1134	0.137213	-0.132646	0.132646	-0.191317	0.191317	-0.0491295	0.0491295	--	--	--	--	[UZ]	--	Vps52 / Sac2 family;; Vps52 / Sac2 family;; Vps52 / Sac2 family;; Vps52 / Sac2 family	Vacuolar protein sorting-associated protein 52 A GN=F3I17.8 OS=Arabidopsis thaliana (Mouse-ear cress) PE=1 SV=1	Z	Cytoskeleton	PREDICTED: vacuolar protein sorting-associated protein 52 A-like [Malus domestica]	--	--	1	p2	(AT)7	14	3294	3307	CCAACCCGTTTACCTCTTGA	59.964	20	AAAGGTACGGGTGGTGTGTT	59.232	20	274	3112	3385	CCAACCCGTTTACCTCTTGA	59.964	20
c72468.graph_c1	25.43	19.48	24.74	26.26	22.32	27	22.6	25.39	25.13	24.2611	2.22382	0.0916618	0.167493	0.167493	0.191036	0.191036	0.0339745	0.0339745	--	--	--	--	--	--	--	--	S	Function unknown	hypothetical protein PRUPE_ppa001858mg [Prunus persica]	--	--	--	--	--	--	--	--	--	--	--	--	--	--	--	--	--	--	--	--
c39760.graph_c0	11.73	8.88	11.09	9.85	10.71	11.92	12.73	10.12	13.53	11.1733	1.38187	0.123676	0.00138007	0.00138007	0.190658	0.190658	0.198219	0.198219	--	--	--	K17398|2.38642e-23|tcc:TCM_036631|Tudor/PWWP/MBT superfamily protein, putative; K17398 DNA (cytosine-5)-methyltransferase 3A [EC:2.1.1.37] (A)	--	--	--	--	R	General function prediction only	Tudor/PWWP/MBT superfamily protein, putative [Theobroma cacao]	--	Cysteine and methionine metabolism (ko00270)	--	--	--	--	--	--	--	--	--	--	--	--	--	--	--	--	--	--
c69194.graph_c1	119.66	113.67	86.09	122.24	102.95	106.49	100.26	135.29	117.56	111.579	13.5789	0.121698	0.0381105	0.0381105	0.190397	0.190397	0.164341	0.164341	[LKJ]	--	Molecular Function: RNA binding (GO:0003723);; Molecular Function: ATP binding (GO:0005524);; Cellular Component: nucleus (GO:0005634);; Molecular Function: ATP-dependent helicase activity (GO:0008026);; Molecular Function: zinc ion binding (GO:0008270);; Cellular Component: chloroplast stroma (GO:0009570);; Biological Process: embryo development ending in seed dormancy (GO:0009793);; Cellular Co…	--	[A]	RNA processing and modification	DEAD/DEAH box helicase;; Helicase conserved C-terminal domain;; GUCT (NUC152) domain;; Zinc knuckle;; Type III restriction enzyme, res subunit	DEAD-box ATP-dependent RNA helicase 3, chloroplastic (Precursor) OS=Arabidopsis thaliana (Mouse-ear cress) PE=1 SV=2	A	RNA processing and modification	hypothetical protein POPTR_0005s00240g [Populus trichocarpa]	molecular function: binding (GO:0005488);; cellular component: cell (GO:0005623);; cellular component: organelle (GO:0043226);; cellular component: cell part (GO:0044464);; biological process: metabolic process (GO:0008152);; biological process: cellular process (GO:0009987);; biological process: single-organism process (GO:0044699);; molecular function: catalytic activity (GO:0003824);; cellular…	--	--	--	--	--	--	--	--	--	--	--	--	--	--	--	--	--	--	--
c70023.graph_c0	8.54	5.99	7.18	7.14	5.99	5.33	5.4	6.19	5.59	6.37222	0.994985	0.156144	-0.177827	0.177827	-0.190312	0.190312	-0.00268169	0.00268169	--	--	--	--	[S]	Function unknown	Cupin superfamily protein	--	S	Function unknown	PREDICTED: uncharacterized protein LOC100852762 [Vitis vinifera]	--	--	1	p1	(A)10	10	1965	1974	ATAATGCTGGATCCAATGGC	59.751	20	CGGCCCCAAAGTACTTGAT	59.94	19	255	1770	2024	ATAATGCTGGATCCAATGGC	59.751	20
c72536.graph_c1	46.6	54.02	50.66	41.45	46.43	35.55	38.09	40.21	42.72	43.97	5.63963	0.128261	-0.1832	0.1832	-0.190178	0.190178	0.00266522	0.00266522	[Z]	Cytoskeleton	Molecular Function: microtubule motor activity (GO:0003777);; Molecular Function: ATP binding (GO:0005524);; Cellular Component: cytoplasm (GO:0005737);; Cellular Component: kinesin complex (GO:0005871);; Cellular Component: microtubule (GO:0005874);; Biological Process: microtubule-based movement (GO:0007018);; Molecular Function: microtubule binding (GO:0008017);; Biological Process: cellulose …	K10395|4.88987e-37|cam:101511562|chromosome-associated kinesin KIF4A-like; K10395 kinesin family member 4/21/27 (A)	[Z]	Cytoskeleton	Kinesin motor domain	Hexokinase-3 GN=At1g50460 OS=Arabidopsis thaliana (Mouse-ear cress) PE=1 SV=1	Z	Cytoskeleton	hypothetical protein JCGZ_16105 [Jatropha curcas]	biological process: metabolic process (GO:0008152);; molecular function: catalytic activity (GO:0003824);; molecular function: binding (GO:0005488);; cellular component: cell (GO:0005623);; cellular component: cell part (GO:0044464);; cellular component: macromolecular complex (GO:0032991);; cellular component: organelle (GO:0043226);; cellular component: organelle part (GO:0044422);; biological …	--	--	--	--	--	--	--	--	--	--	--	--	--	--	--	--	--	--	--
c70721.graph_c0	23.39	15.23	17.14	21.49	16.71	20.1	18.85	13.35	17.19	18.1611	2.95308	0.162605	-0.11563	0.11563	-0.189772	0.189772	-0.0643448	0.0643448	--	--	Molecular Function: nucleic acid binding (GO:0003676);; Molecular Function: zinc ion binding (GO:0008270);; Molecular Function: heat shock protein binding (GO:0031072);; Molecular Function: unfolded protein binding (GO:0051082);;	--	--	--	Whirly transcription factor	Single-stranded DNA-binding protein WHY1, chloroplastic (Precursor) GN=F14L17.18 OS=Arabidopsis thaliana (Mouse-ear cress) PE=1 SV=1	R	General function prediction only	PREDICTED: uncharacterized protein LOC100258796 [Vitis vinifera]	molecular function: binding (GO:0005488)	--	3	p1	(T)13	13	3465	3477	TTATCGTTGTGAACGCCAAA	60.111	20	TGGCTGATAAGTTGCATTTCA	59.315	21	219	3335	3553	TTGTGAACGCCAAATTCTTG	59.706	20
c56980.graph_c0	16.85	16.21	12.68	13.85	14.51	12.2	14.16	12.08	11.17	13.7456	1.80769	0.131511	-0.129078	0.129078	-0.189563	0.189563	-0.0510656	0.0510656	--	--	Molecular Function: structural constituent of ribosome (GO:0003735);; Cellular Component: ribosome (GO:0005840);; Biological Process: translation (GO:0006412);; Cellular Component: plastid (GO:0009536);; Biological Process: production of ta-siRNAs involved in RNA interference (GO:0010267);; Biological Process: production of miRNAs involved in gene silencing by miRNA (GO:0035196);; Biological Proc…	K02959|2.33417e-27|vvi:100245562|37S ribosomal protein S16, mitochondrial; K02959 small subunit ribosomal protein S16 (A)	[J]	Translation, ribosomal structure and biogenesis	--	--	J	Translation, ribosomal structure and biogenesis	hypothetical protein CISIN_1g030374mg [Citrus sinensis]	molecular function: structural molecule activity (GO:0005198);; cellular component: cell (GO:0005623);; cellular component: macromolecular complex (GO:0032991);; cellular component: organelle (GO:0043226);; cellular component: cell part (GO:0044464);; biological process: metabolic process (GO:0008152);; biological process: cellular process (GO:0009987);; biological process: single-organism proces…	Ribosome (ko03010)	--	--	--	--	--	--	--	--	--	--	--	--	--	--	--	--	--	--
c70248.graph_c0	60.11	60.46	59.3	71.01	70.86	65.05	83.11	71.03	66.23	67.4622	7.13955	0.10583	0.042407	0.042407	0.189519	0.189519	0.156433	0.156433	--	--	--	K17600|9.88562e-152|cic:CICLE_v10014122mg|hypothetical protein; K17600 vacuolar protein sorting-associated protein 54 (A)	[U]	Intracellular trafficking, secretion, and vesicular transport	Vps54-like protein;; Protein of unknown function N-terminal domain (DUF2450)	Vacuolar protein sorting-associated protein 54, chloroplastic (Precursor) GN=VPS54 OS=Arabidopsis thaliana (Mouse-ear cress) PE=1 SV=1	U	Intracellular trafficking, secretion, and vesicular transport	hypothetical protein CISIN_1g0016972mg [Citrus sinensis]	--	--	1	p1	(T)10	10	2594	2603	GGGATGGGTGGAGGATTATT	59.843	20	TTCATTGGGTTCTCAATCCC	59.727	20	269	2523	2791	GGGATGGGTGGAGGATTATT	59.843	20
c67888.graph_c2	11.38	10.83	13.11	14.97	13.53	13.5	13.05	11.85	13.01	12.8033	1.1895	0.0929055	0.147244	0.147244	0.189245	0.189245	0.0521282	0.0521282	--	--	--	--	--	--	--	--	S	Function unknown	Alpha-1B-glycoprotein [Gossypium arboreum]	--	--	2	p1	(A)15	15	2162	2176	GGATCCAAGACGAAGGAATG	59.483	20	CGTTGAATCATTGGGGAACT	59.79	20	147	2115	2261	GAGGATCCAAGACGAAGGAA	59.213	20
c70981.graph_c3	44.79	43.23	44.13	35.25	40.69	38.56	36.76	35.31	36.88	39.5111	3.58427	0.0907156	-0.114156	0.114156	-0.189241	0.189241	-0.0664661	0.0664661	[U]	Intracellular trafficking, secretion, and vesicular transport	--	--	[U]	Intracellular trafficking, secretion, and vesicular transport	Regulated-SNARE-like domain;; Synaptobrevin;; Synaptobrevin	25.3 kDa vesicle transport protein GN=SEC22 OS=Arabidopsis thaliana (Mouse-ear cress) PE=2 SV=1	S	Function unknown	Uncharacterized protein isoform 1 [Theobroma cacao]	--	--	2	p2	(AG)6	12	8257	8268	TGTGTCTTGTTGGGTTTGCT	59.187	20	GTCTGAAGCGCCACTCACTT	60.599	20	113	8199	8311	GTGTGTCTTGTTGGGTTTGC	59.037	20
c71997.graph_c0	7.35	8.15	5.7	5.77	7.83	6.78	7.05	5.72	6.15	6.72222	0.885322	0.131701	-0.145806	0.145806	-0.189119	0.189119	-0.0342289	0.0342289	--	--	--	--	[T]	Signal transduction mechanisms	NB-ARC domain;; Leucine Rich repeats (2 copies);; Leucine rich repeat;; Leucine Rich Repeat	Putative disease resistance RPP13-like protein 1 GN=RPPL1 OS=Arabidopsis thaliana (Mouse-ear cress) PE=3 SV=1	T	Signal transduction mechanisms	NBS-LRR resistance gene-like protein ARGH30 [Populus trichocarpa]	--	--	--	--	--	--	--	--	--	--	--	--	--	--	--	--	--	--	--	--
c70110.graph_c1	108.95	104.75	144.86	109.93	105.32	122.35	103.41	131.44	119.56	116.73	13.3549	0.114408	0.0934252	0.0934252	0.188986	0.188986	0.105959	0.105959	--	--	--	--	--	--	--	--	S	Function unknown	PREDICTED: suppressor protein SRP40 [Prunus mume]	--	--	--	--	--	--	--	--	--	--	--	--	--	--	--	--	--	--	--	--
c62039.graph_c0	49.57	35.18	47.6	44.05	40.03	41.11	38.82	32.52	32.45	40.1478	5.81532	0.144848	-0.000371832	0.000371832	-0.188155	0.188155	-0.178883	0.178883	--	--	Molecular Function: inositol-1,4,5-trisphosphate 3-kinase activity (GO:0008440);; Biological Process: phosphorylation (GO:0016310);;	K00915|4.96965e-161|pop:POPTR_0015s12100g|POPTRDRAFT_253088; hypothetical protein; K00915 1D-myo-Inositol-tetrakisphosphate 5-kinase / inositol-polyphosphate multikinase [EC:2.7.1.140 2.7.1.151] (A)	[KIT]	--	Inositol polyphosphate kinase	Inositol polyphosphate multikinase beta OS=Arabidopsis thaliana (Mouse-ear cress) PE=1 SV=1	T	Signal transduction mechanisms	hypothetical protein POPTR_0015s12100g [Populus trichocarpa]	biological process: metabolic process (GO:0008152);; biological process: cellular process (GO:0009987);; molecular function: catalytic activity (GO:0003824)	Inositol phosphate metabolism (ko00562);; Phosphatidylinositol signaling system (ko04070)	--	--	--	--	--	--	--	--	--	--	--	--	--	--	--	--	--	--
c68084.graph_c2	260.86	280.53	273.86	311.73	294.35	303.33	310.98	287.03	262.96	287.292	18.2034	0.063362	0.190218	0.190218	0.188056	0.188056	0.00821154	0.00821154	[J]	Translation, ribosomal structure and biogenesis	Molecular Function: RNA binding (GO:0003723);; Molecular Function: structural constituent of ribosome (GO:0003735);; Biological Process: translation (GO:0006412);; Cellular Component: small ribosomal subunit (GO:0015935);;	K02989|1.04124e-116|mdm:103449587|40S ribosomal protein S5-like; K02989 small subunit ribosomal protein S5e (A)	[J]	Translation, ribosomal structure and biogenesis	RNA recognition motif. (a.k.a. RRM, RBD, or RNP domain);; RNA recognition motif (a.k.a. RRM, RBD, or RNP domain);; RNA recognition motif. (a.k.a. RRM, RBD, or RNP domain);; Ribosomal protein S7p/S5e	40S ribosomal protein S5 (Fragment) GN=RPS5 OS=Cicer arietinum (Chickpea) PE=2 SV=1	J	Translation, ribosomal structure and biogenesis	PREDICTED: 40S ribosomal protein S5-like [Malus domestica]	molecular function: binding (GO:0005488);; molecular function: structural molecule activity (GO:0005198);; biological process: metabolic process (GO:0008152);; biological process: cellular process (GO:0009987);; cellular component: cell (GO:0005623);; cellular component: macromolecular complex (GO:0032991);; cellular component: organelle (GO:0043226);; cellular component: organelle part (GO:00444…	Ribosome (ko03010)	1	p3	(GGT)5	15	3098	3112	TGGTTAATTGGGTGCAGGAT	60.192	20	CCACGTCCTCTACCACCACT	60.026	20	263	2938	3200	AGGCAAAACCTAGAGGCGAT	60.228	20
c66129.graph_c0	22.54	25.23	22.2	33.92	23	23.52	32.48	25.01	20.27	25.3522	4.43356	0.174879	0.0972177	0.0972177	0.187922	0.187922	0.102709	0.102709	--	--	--	--	[G]	Carbohydrate transport and metabolism	--	Purple acid phosphatase 22 (Precursor) GN=F3C22.220 OS=Arabidopsis thaliana (Mouse-ear cress) PE=2 SV=1	--	--	--	--	--	2	p1	(T)12	12	1718	1729	TTGAATACGGCAGCTCATTT	58.388	20	TATGGGCCTATGGCTACCAG	59.938	20	257	1657	1913	TTGAATACGGCAGCTCATTT	58.388	20
c67647.graph_c0	17.68	16.58	16.78	15.23	14.66	15.95	13.45	13.88	13.96	15.3522	1.39603	0.0909336	-0.109333	0.109333	-0.187895	0.187895	-0.0682236	0.0682236	--	--	Cellular Component: intracellular membrane-bounded organelle (GO:0043231);; Cellular Component: cytoplasmic part (GO:0044444);; Biological Process: response to stimulus (GO:0050896);;	--	--	--	Alpha/beta hydrolase family;; Putative lysophospholipase;; Alpha/beta hydrolase family	Protein AUXIN RESPONSE 4 GN=AXR4 OS=Arabidopsis thaliana (Mouse-ear cress) PE=2 SV=1	S	Function unknown	PREDICTED: protein AUXIN RESPONSE 4 [Populus euphratica]	cellular component: cell (GO:0005623);; cellular component: organelle (GO:0043226);; cellular component: cell part (GO:0044464);; biological process: response to stimulus (GO:0050896)	--	--	--	--	--	--	--	--	--	--	--	--	--	--	--	--	--	--	--
c46977.graph_c0	43.58	36.07	34.26	34.5	31.37	40.93	27.65	33.03	34.56	35.1056	4.49565	0.128061	-0.0384072	0.0384072	-0.187713	0.187713	-0.138029	0.138029	--	--	--	K03626|7.1992e-13|rcu:RCOM_0621670|nascent polypeptide associated complex alpha subunit, putative (EC:3.6.3.8); K03626 nascent polypeptide-associated complex subunit alpha (A)	[K]	Transcription	--	Nascent polypeptide-associated complex subunit alpha-like protein 2 GN=At3g49470 OS=Arabidopsis thaliana (Mouse-ear cress) PE=2 SV=2	K	Transcription	nascent polypeptide associated complex alpha subunit, putative [Ricinus communis]	--	--	--	--	--	--	--	--	--	--	--	--	--	--	--	--	--	--	--	--
c67445.graph_c0	9.73	12.47	12.87	8.68	12.96	10.88	9.54	10.18	9.77	10.7867	1.50615	0.139631	-0.0928136	0.0928136	-0.187668	0.187668	-0.0863787	0.0863787	--	--	--	--	--	--	Arabidopsis broad-spectrum mildew resistance protein RPW8;; NB-ARC domain;; AAA domain;; Leucine Rich repeats (2 copies);; Leucine rich repeat;; Leucine Rich Repeat	Probable disease resistance protein At5g66900 GN=At5g66900 OS=Arabidopsis thaliana (Mouse-ear cress) PE=3 SV=1	T	Signal transduction mechanisms	PREDICTED: probable disease resistance protein At5g66900 [Pyrus x bretschneideri]	--	--	--	--	--	--	--	--	--	--	--	--	--	--	--	--	--	--	--	--
c51931.graph_c0	6.83	8.05	6.81	7.34	7.22	7.43	8.55	7.24	7	7.38556	0.541461	0.0733135	0.062292	0.062292	0.187486	0.187486	0.135634	0.135634	--	--	Cellular Component: ubiquitin ligase complex (GO:0000151);; Molecular Function: ubiquitin-protein transferase activity (GO:0004842);; Biological Process: protein ubiquitination (GO:0016567);;	--	[S]	Function unknown	Armadillo/beta-catenin-like repeat;; U-box domain;; HEAT repeats;; Kinesin-associated protein (KAP);; Neurochondrin	U-box domain-containing protein 10 GN=PUB10 OS=Arabidopsis thaliana (Mouse-ear cress) PE=2 SV=1	S	Function unknown	PREDICTED: U-box domain-containing protein 11 [Vitis vinifera]	cellular component: cell (GO:0005623);; cellular component: macromolecular complex (GO:0032991);; cellular component: cell part (GO:0044464);; biological process: metabolic process (GO:0008152);; biological process: cellular process (GO:0009987);; molecular function: catalytic activity (GO:0003824)	--	--	--	--	--	--	--	--	--	--	--	--	--	--	--	--	--	--	--
c68191.graph_c2	92.08	77.56	111.44	98.89	107.43	116.89	104.25	143.13	121.51	108.131	17.5903	0.162676	0.177833	0.177833	0.186728	0.186728	0.018287	0.018287	--	--	--	--	--	--	Ankyrin repeat	Ankyrin repeat protein SKIP35 GN=SKIP35 OS=Arabidopsis thaliana (Mouse-ear cress) PE=1 SV=1	S	Function unknown	PREDICTED: ankyrin repeat protein SKIP35-like [Vitis vinifera]	--	--	2	p3	(TTA)5	15	282	296	AGCTTTGTCACCATAACCGC	60.14	20	GAAGGCTAGGAAGTGGGGTC	60.074	20	228	247	474	AGCTTTGTCACCATAACCGC	60.14	20
c64331.graph_c0	15.2	13.23	12.93	15.25	14.14	14.42	14.96	13.45	14.46	14.2267	0.810322	0.056958	0.153152	0.153152	0.18647	0.18647	0.0431465	0.0431465	--	--	Molecular Function: catalytic activity (GO:0003824);; Biological Process: RNA metabolic process (GO:0016070);; Biological Process: RNA interference (GO:0016246);; Cellular Component: nuclear DNA-directed RNA polymerase complex (GO:0055029);;	K03012|1.33992e-61|pmum:103324381|DNA-directed RNA polymerases IV and V subunit 4; K03012 DNA-directed RNA polymerase II subunit RPB4 (A)	[K]	Transcription	RNA polymerase Rpb4	DNA-directed RNA polymerases IV and V subunit 4 GN=dl4012w OS=Arabidopsis thaliana (Mouse-ear cress) PE=1 SV=2	K	Transcription	PREDICTED: DNA-directed RNA polymerases IV and V subunit 4 [Prunus mume]	biological process: metabolic process (GO:0008152);; molecular function: catalytic activity (GO:0003824);; biological process: cellular process (GO:0009987);; biological process: single-organism process (GO:0044699);; biological process: biological regulation (GO:0065007);; cellular component: cell (GO:0005623);; cellular component: macromolecular complex (GO:0032991);; cellular component: organe…	Purine metabolism (ko00230);; Pyrimidine metabolism (ko00240);; RNA polymerase (ko03020)	2	c	(AT)6aatgttcagttaatattatttatatattcagttaatattatt(TA)7	68	4006	4073	CCAAGCCTATGTTCAAAAGGA	59.211	21	AAATGGCAGTGACCGACTTC	60.119	20	231	3967	4197	CCAAGCCTATGTTCAAAAGGA	59.211	21
c69992.graph_c0	18.21	19.63	18.96	17.57	21.71	20	21.03	18.86	19.65	19.5133	1.22941	0.0630035	0.0976006	0.0976006	0.185839	0.185839	0.0971967	0.0971967	[EQ]	--	Cellular Component: cytosol (GO:0005829);; Biological Process: glutathione catabolic process (GO:0006751);; Cellular Component: plasmodesma (GO:0009506);; Molecular Function: 5-oxoprolinase (ATP-hydrolyzing) activity (GO:0017168);;	K01469|0|vvi:100252923|5-oxoprolinase; K01469 5-oxoprolinase (ATP-hydrolysing) [EC:3.5.2.9] (A)	[E]	Amino acid transport and metabolism	Hydantoinase B/oxoprolinase;; Hydantoinase/oxoprolinase;; Hydantoinase/oxoprolinase N-terminal region	5-oxoprolinase GN=OXP1 OS=Arabidopsis thaliana (Mouse-ear cress) PE=2 SV=1	E	Amino acid transport and metabolism	PREDICTED: 5-oxoprolinase [Vitis vinifera]	cellular component: cell (GO:0005623);; cellular component: cell part (GO:0044464);; biological process: metabolic process (GO:0008152);; biological process: cellular process (GO:0009987);; biological process: single-organism process (GO:0044699);; cellular component: cell junction (GO:0030054);; cellular component: symplast (GO:0055044);; molecular function: catalytic activity (GO:0003824)	Glutathione metabolism (ko00480)	1	p2	(GA)9	18	368	385	TAGCTGGCTTCTCAGCAACA	59.888	20	CTTCATTACCAGCGTCCACA	59.716	20	231	339	569	TAGCTGGCTTCTCAGCAACA	59.888	20
c63209.graph_c0	72.35	62.17	67.25	63.05	70.78	68.33	59.27	62.56	63.32	65.4533	4.15201	0.0634347	-0.0559617	0.0559617	-0.185734	0.185734	-0.120653	0.120653	--	--	--	--	--	--	--	Transmembrane 9 superfamily member 1 {ECO:0000305} (Precursor) OS=Arabidopsis thaliana (Mouse-ear cress) PE=1 SV=1	--	--	--	--	--	3	p1	(T)12	12	1067	1078	CCAAGCAAAACAAGACTGGG	60.659	20	AAATCCCCTTGAATTAGCCG	60.272	20	193	956	1148	CCAAGCAAAACAAGACTGGG	60.659	20
c47926.graph_c0	67.24	52.1	64.13	65.59	48.27	70.78	46.6	79.52	66.36	62.2878	10.3863	0.166746	0.0565601	0.0565601	0.185416	0.185416	0.141169	0.141169	[S]	Function unknown	--	--	--	--	Protein of unknown function (DUF1517)	--	S	Function unknown	hypothetical protein JCGZ_23463 [Jatropha curcas]	--	--	--	--	--	--	--	--	--	--	--	--	--	--	--	--	--	--	--	--
c67015.graph_c2	10.45	8.72	8.76	9.74	8.83	8.21	7.71	7.56	7.26	8.58222	0.97943	0.114123	-0.0174682	0.0174682	-0.185275	0.185275	-0.157906	0.157906	--	--	Molecular Function: polygalacturonate 4-alpha-galacturonosyltransferase activity (GO:0047262);;	K13648|0|tcc:TCM_014355|Galacturonosyltransferase 11; K13648 alpha-1,4-galacturonosyltransferase [EC:2.4.1.43] (A)	--	--	Glycosyl transferase family 8	Probable galacturonosyltransferase 11 GN=GAUT11 OS=Arabidopsis thaliana (Mouse-ear cress) PE=2 SV=1	G	Carbohydrate transport and metabolism	Galacturonosyltransferase 11 [Theobroma cacao]	biological process: metabolic process (GO:0008152);; molecular function: catalytic activity (GO:0003824)	Starch and sucrose metabolism (ko00500);; Amino sugar and nucleotide sugar metabolism (ko00520)	1	p1	(A)16	16	221	236	TTCTACAGGTCGCAGAAGGG	60.388	20	CCTCCAAAGGGAAAGGTGAT	60.298	20	132	177	308	TTCTACAGGTCGCAGAAGGG	60.388	20
c69039.graph_c0	31	31.54	32.56	29.66	34.35	31.48	33.78	31.44	34.13	32.2156	1.50534	0.0467271	0.0118401	0.0118401	0.185192	0.185192	0.182378	0.182378	--	--	Cellular Component: mRNA cleavage and polyadenylation specificity factor complex (GO:0005847);; Biological Process: RNA processing (GO:0006396);; Biological Process: posttranscriptional gene silencing by RNA (GO:0035194);;	K06100|0|pvu:PHAVU_010G000700g|hypothetical protein; K06100 symplekin (A)	[A]	RNA processing and modification	Domain of unknown function (DUF3453);; Symplekin tight junction protein C terminal	--	A	RNA processing and modification	hypothetical protein PHAVU_010G000700g [Phaseolus vulgaris]	cellular component: cell (GO:0005623);; cellular component: membrane-enclosed lumen (GO:0031974);; cellular component: macromolecular complex (GO:0032991);; cellular component: organelle (GO:0043226);; cellular component: organelle part (GO:0044422);; cellular component: cell part (GO:0044464);; biological process: metabolic process (GO:0008152);; biological process: cellular process (GO:0009987)…	mRNA surveillance pathway (ko03015)	2	p1	(A)14	14	5457	5470	ACCCAACATCAAGTCCAACC	59.679	20	GCGCCGGTATCTTTTTCATA	60.061	20	144	5382	5525	ACCCAACATCAAGTCCAACC	59.679	20
c72863.graph_c0	31.16	40.73	37.8	32.56	37.34	34.61	37.73	38.47	38.12	36.5022	2.90436	0.0795668	0.0241762	0.0241762	0.185164	0.185164	0.171369	0.171369	--	--	Molecular Function: calcium-dependent cysteine-type endopeptidase activity (GO:0004198);; Cellular Component: intracellular (GO:0005622);; Biological Process: proteolysis (GO:0006508);;	--	[OT]	--	Calpain family cysteine protease;; Calpain large subunit, domain III;; Concanavalin A-like lectin/glucanases superfamily	Calpain-type cysteine protease DEK1 (Precursor) GN=F7A10.23 OS=Arabidopsis thaliana (Mouse-ear cress) PE=1 SV=1	T	Signal transduction mechanisms	hypothetical protein PRUPE_ppa000045mg [Prunus persica]	biological process: metabolic process (GO:0008152);; molecular function: catalytic activity (GO:0003824);; cellular component: cell (GO:0005623);; cellular component: cell part (GO:0044464)	--	2	c	(A)16gatatgtagtttcagctgcagttttgaaatgctttgatcagttgtacacttgtatttgtacaattgtg(T)11	95	7416	7510	TGTGATTGTAAATGTGGGGG	59.097	20	CTGGTACGGAAAGGCCATAA	59.953	20	231	7330	7560	GTGTGATTGTAAATGTGGGGG	59.963	21
c66434.graph_c1	72.31	67.74	80.93	63.3	82.74	72.59	77.98	72.68	79.07	74.3711	6.00909	0.0807987	0.0311389	0.0311389	0.185098	0.185098	0.161921	0.161921	--	--	Biological Process: protein transport (GO:0015031);; Cellular Component: integral component of membrane (GO:0016021);;	--	[U]	Intracellular trafficking, secretion, and vesicular transport	SCAMP family	Putative secretory carrier-associated membrane protein 1 GN=SCAMP1 OS=Oryza sativa subsp. indica (Rice) PE=3 SV=1	U	Intracellular trafficking, secretion, and vesicular transport	PREDICTED: secretory carrier-associated membrane protein 3 [Vitis vinifera]	biological process: localization (GO:0051179);; cellular component: membrane (GO:0016020);; cellular component: membrane part (GO:0044425)	--	--	--	--	--	--	--	--	--	--	--	--	--	--	--	--	--	--	--
c71668.graph_c0	33.86	37.56	41.35	37.19	38.92	37.08	49.44	34.86	38.31	38.73	4.30681	0.111201	0.0124278	0.0124278	0.185002	0.185002	0.181656	0.181656	[B]	Chromatin structure and dynamics	--	K11644|0|tcc:TCM_017920|SIN3-like 2, putative isoform 1; K11644 paired amphipathic helix protein Sin3a (A)	[B]	Chromatin structure and dynamics	Paired amphipathic helix repeat;; Sin3 family co-repressor	Paired amphipathic helix protein Sin3-like 2 GN=SNL2 OS=Arabidopsis thaliana (Mouse-ear cress) PE=1 SV=2	B	Chromatin structure and dynamics	SIN3-like 2, putative isoform 1 [Theobroma cacao]	--	--	--	--	--	--	--	--	--	--	--	--	--	--	--	--	--	--	--	--
c68605.graph_c0	62.28	51.64	60.16	63.24	49.58	49.1	54.83	51.19	46.05	54.23	5.89076	0.108625	-0.154855	0.154855	-0.184787	0.184787	-0.0198528	0.0198528	--	--	Molecular Function: nucleotide binding (GO:0000166);; Molecular Function: RNA binding (GO:0003723);; Cellular Component: ribonucleoprotein complex (GO:0030529);;	K12898|7.81522e-151|pop:POPTR_0005s10420g|POPTRDRAFT_650984; hypothetical protein; K12898 heterogeneous nuclear ribonucleoprotein F/H (A)	[A]	RNA processing and modification	RNA recognition motif (a.k.a. RRM, RBD, or RNP domain);; RNA recognition motif. (a.k.a. RRM, RBD, or RNP domain)	--	A	RNA processing and modification	RNA-binding family protein isoform 2 [Theobroma cacao]	molecular function: binding (GO:0005488);; cellular component: cell (GO:0005623);; cellular component: macromolecular complex (GO:0032991);; cellular component: cell part (GO:0044464)	--	--	--	--	--	--	--	--	--	--	--	--	--	--	--	--	--	--	--
c65985.graph_c0	8.75	9	6.84	7.45	9.5	6.27	8.01	6.43	5.53	7.53111	1.29274	0.171654	-0.0364762	0.0364762	-0.184682	0.184682	-0.140273	0.140273	--	--	--	--	[S]	Function unknown	--	--	R	General function prediction only	PREDICTED: uncharacterized protein LOC103333609 [Prunus mume]	--	--	--	--	--	--	--	--	--	--	--	--	--	--	--	--	--	--	--	--
c61653.graph_c0	48.52	37.51	29.28	36.44	32.05	31.07	35.96	33.68	24.02	34.2811	6.38229	0.186175	-0.158686	0.158686	-0.184123	0.184123	-0.0154539	0.0154539	--	--	Cellular Component: commitment complex (GO:0000243);; Biological Process: spliceosomal snRNP assembly (GO:0000387);; Biological Process: mRNA 5'-splice site recognition (GO:0000395);; Molecular Function: mRNA binding (GO:0003729);; Cellular Component: U1 snRNP (GO:0005685);; Molecular Function: zinc ion binding (GO:0008270);; Molecular Function: U1 snRNA binding (GO:0030619);; Cellular Component:…	K11095|3.21149e-70|tcc:TCM_043735|C2H2 and C2HC zinc fingers superfamily protein isoform 1; K11095 U1 small nuclear ribonucleoprotein C (A)	[A]	RNA processing and modification	--	U1 small nuclear ribonucleoprotein C {ECO:0000255|HAMAP-Rule:MF_03153} GN=VIT_07s0104g01170 OS=Vitis vinifera (Grape) PE=3 SV=1	A	RNA processing and modification	C2H2 and C2HC zinc fingers superfamily protein isoform 1 [Theobroma cacao]	cellular component: cell (GO:0005623);; cellular component: macromolecular complex (GO:0032991);; cellular component: organelle (GO:0043226);; cellular component: organelle part (GO:0044422);; cellular component: cell part (GO:0044464);; biological process: metabolic process (GO:0008152);; biological process: cellular process (GO:0009987);; biological process: cellular component organization or b…	Spliceosome (ko03040)	--	--	--	--	--	--	--	--	--	--	--	--	--	--	--	--	--	--
c68624.graph_c2	83.52	63.42	79.86	82.95	73.47	79.11	83.44	73.19	83.82	78.0867	6.49184	0.0831364	0.087389	0.087389	0.184031	0.184031	0.10622	0.10622	[R]	General function prediction only	Molecular Function: carboxylic ester hydrolase activity (GO:0004091);; Cellular Component: cytoplasmic membrane-bounded vesicle (GO:0016023);; Molecular Function: S-formylglutathione hydrolase activity (GO:0018738);; Biological Process: formaldehyde catabolic process (GO:0046294);; Cellular Component: apoplast (GO:0048046);; Molecular Function: retinyl-palmitate esterase activity (GO:0050253);; M…	K01070|2.87908e-149|rcu:RCOM_0893450|Esterase D, putative (EC:3.1.1.1); K01070 S-formylglutathione hydrolase [EC:3.1.2.12] (A)	[R]	General function prediction only	Putative esterase;; Prolyl oligopeptidase family;; Alpha/beta hydrolase family	S-formylglutathione hydrolase GN=SFGH OS=Arabidopsis thaliana (Mouse-ear cress) PE=1 SV=2	R	General function prediction only	hypothetical protein JCGZ_21123 [Jatropha curcas]	cellular component: cell (GO:0005623);; cellular component: organelle (GO:0043226);; cellular component: cell part (GO:0044464);; biological process: metabolic process (GO:0008152);; molecular function: catalytic activity (GO:0003824);; biological process: cellular process (GO:0009987);; biological process: single-organism process (GO:0044699);; cellular component: extracellular region (GO:000557…	Carbon metabolism (ko01200)	2	p1	(A)10	10	1963	1972	AATTTGCTTGGCAACAATCC	59.945	20	GGGTTTTGGCTAGGGTTTTC	59.814	20	225	1930	2154	GCTTGGCAACAATCCAAAGT	60.118	20
c70261.graph_c0	447.31	348.37	580.13	509.26	472.91	519.67	558.58	426.74	429.3	476.919	68.6357	0.143915	0.170115	0.170115	0.183907	0.183907	0.022343	0.022343	[G]	Carbohydrate transport and metabolism	Cellular Component: phosphopyruvate hydratase complex (GO:0000015);; Molecular Function: magnesium ion binding (GO:0000287);; Molecular Function: phosphopyruvate hydratase activity (GO:0004634);; Biological Process: glycolytic process (GO:0006096);;	K01689|1.26478e-165|csv:101208322|enolase-like; K01689 enolase [EC:4.2.1.11] (A)	[G]	Carbohydrate transport and metabolism	Enolase, C-terminal TIM barrel domain;; Enolase, N-terminal domain;; Enolase, C-terminal TIM barrel domain;; Methylaspartate ammonia-lyase C-terminus;; Protein of unknown function (DUF561);; Protein of unknown function (DUF561)	Enolase OS=Ricinus communis (Castor bean) PE=2 SV=1	G	Carbohydrate transport and metabolism	PREDICTED: enolase-like [Cucumis sativus]	cellular component: cell (GO:0005623);; cellular component: macromolecular complex (GO:0032991);; cellular component: cell part (GO:0044464);; molecular function: binding (GO:0005488);; biological process: metabolic process (GO:0008152);; molecular function: catalytic activity (GO:0003824);; biological process: cellular process (GO:0009987);; biological process: single-organism process (GO:004469…	Glycolysis / Gluconeogenesis (ko00010);; Carbon metabolism (ko01200);; Biosynthesis of amino acids (ko01230);; RNA degradation (ko03018)	--	--	--	--	--	--	--	--	--	--	--	--	--	--	--	--	--	--
c63101.graph_c0	11.27	9.7	9.5	10.07	11.99	10.91	11.07	11.41	9.41	10.5922	0.886351	0.0836794	0.159165	0.159165	0.183697	0.183697	0.0332774	0.0332774	[KAD]	--	Molecular Function: DNA binding (GO:0003677);; Molecular Function: chromatin binding (GO:0003682);;	K09422|9.58705e-170|vvi:100256309|uncharacterized LOC100256309; K09422 myb proto-oncogene protein, plant (A)	[K]	Transcription	Myb-like DNA-binding domain;; Myb-like DNA-binding domain	Transcription factor MYB44 GN=K8K14.2 OS=Arabidopsis thaliana (Mouse-ear cress) PE=2 SV=1	K	Transcription	PREDICTED: uncharacterized protein LOC100256309 [Vitis vinifera]	molecular function: binding (GO:0005488)	--	--	--	--	--	--	--	--	--	--	--	--	--	--	--	--	--	--	--
c70141.graph_c0	26.83	25.36	21.52	22.27	23.37	18.86	23.25	20.3	21.05	22.5344	2.34385	0.104012	-0.196974	0.196974	-0.183037	0.183037	0.0228215	0.0228215	[S]	Function unknown	--	--	[R]	General function prediction only	Leucine rich repeat;; Leucine Rich repeats (2 copies);; Leucine Rich Repeat;; Leucine rich repeat;; Leucine Rich repeat	Plant intracellular Ras-group-related LRR protein 5 OS=Oryza sativa subsp. japonica (Rice) PE=2 SV=1	R	General function prediction only	Plant intracellular ras group-related LRR 4 isoform 2 [Theobroma cacao]	--	--	4	p2	(TA)6	12	2887	2898	ACATCACCCTTGTGCCTGTT	60.431	20	TTGGCAAATCCTGTTGTGTC	59.547	20	276	2747	3022	ACATCACCCTTGTGCCTGTT	60.431	20
c64698.graph_c0	43.71	49.85	55.62	53.71	55.35	52.24	50.38	53.99	52.22	51.8967	3.45112	0.0664998	0.119178	0.119178	0.182974	0.182974	0.0737907	0.0737907	--	--	Molecular Function: DNA binding (GO:0003677);; Molecular Function: sequence-specific DNA binding transcription factor activity (GO:0003700);; Cellular Component: nucleolus (GO:0005730);; Biological Process: regulation of transcription, DNA-templated (GO:0006355);; Biological Process: response to ethylene (GO:0009723);; Molecular Function: protein homodimerization activity (GO:0042803);;	--	--	--	GAGA binding protein-like family	Protein BASIC PENTACYSTEINE6 GN=MDH9.22 OS=Arabidopsis thaliana (Mouse-ear cress) PE=1 SV=1	K	Transcription	PREDICTED: uncharacterized protein LOC100783502 isoform X1 [Glycine max]	molecular function: binding (GO:0005488);; biological process: biological regulation (GO:0065007);; molecular function: nucleic acid binding transcription factor activity (GO:0001071);; cellular component: cell (GO:0005623);; cellular component: membrane-enclosed lumen (GO:0031974);; cellular component: organelle (GO:0043226);; cellular component: organelle part (GO:0044422);; cellular component:…	--	1	p1	(A)10	10	3332	3341	AACCAAAAGTCCCAAGCTCA	59.711	20	CAACCTTGCTCGAGCTCTCT	59.891	20	263	3288	3550	AACCAAAAGTCCCAAGCTCA	59.711	20
c62649.graph_c0	19.25	23.34	23.11	14.33	17.75	20.5	17.35	18.48	16.6	18.9678	2.79196	0.147195	-0.129937	0.129937	-0.182731	0.182731	-0.0439177	0.0439177	--	--	--	K14771|1.95783e-165|tcc:TCM_007571|CCAAT-binding factor, putative isoform 1; K14771 U3 small nucleolar RNA-associated protein 19 (A)	[J]	Translation, ribosomal structure and biogenesis	CBF/Mak21 family	--	J	Translation, ribosomal structure and biogenesis	CCAAT-binding factor, putative isoform 1 [Theobroma cacao]	--	--	--	--	--	--	--	--	--	--	--	--	--	--	--	--	--	--	--	--
c67682.graph_c2	17.33	18.52	13.9	13.07	17.06	13.51	15.5	12.72	12.26	14.8744	2.16107	0.145287	-0.152383	0.152383	-0.182525	0.182525	-0.0217077	0.0217077	--	--	--	--	--	--	--	--	--	--	--	--	--	1	p1	(T)13	13	611	623	GCAGATTTGGGCATCAGAAT	60.043	20	GAATCATCATTTTGGGGTGG	59.991	20	270	425	694	GCAGATTTGGGCATCAGAAT	60.043	20
c72836.graph_c2	37.26	37.88	35.65	42.19	40.84	40.28	41.49	38.12	38.37	39.12	2.05335	0.0524886	0.187986	0.187986	0.182518	0.182518	0.00465155	0.00465155	[Z]	Cytoskeleton	Molecular Function: motor activity (GO:0003774);; Molecular Function: ATP binding (GO:0005524);; Cellular Component: plasma membrane (GO:0005886);; Cellular Component: cell plate (GO:0009504);; Cellular Component: phragmoplast (GO:0009524);; Cellular Component: myosin complex (GO:0016459);;	--	[Z]	Cytoskeleton	Myosin head (motor domain);; IQ calmodulin-binding motif	Myosin-1 GN=MZE19.1 OS=Arabidopsis thaliana (Mouse-ear cress) PE=1 SV=1	Z	Cytoskeleton	Myosin 1 isoform 1 [Theobroma cacao]	biological process: metabolic process (GO:0008152);; molecular function: catalytic activity (GO:0003824);; molecular function: binding (GO:0005488);; cellular component: cell (GO:0005623);; cellular component: membrane (GO:0016020);; cellular component: cell part (GO:0044464);; cellular component: macromolecular complex (GO:0032991);; cellular component: organelle (GO:0043226);; cellular componen…	--	2	p1	(A)13	13	3170	3182	ATGGCACCTTTGACATCTCC	59.934	20	CAGACTGGCTTGGTTGAAGA	59.007	20	180	3122	3301	CTTGATTTGGATGGCACCTT	59.933	20
c67776.graph_c1	29.99	25.17	29.07	26.66	25.82	25.47	21.69	20.51	20.89	25.03	3.21702	0.128527	-0.00308335	0.00308335	-0.18211	0.18211	-0.16973	0.16973	--	--	Cellular Component: plant-type cell wall (GO:0009505);; Molecular Function: pectinesterase activity (GO:0030599);; Biological Process: cell wall modification (GO:0042545);; Molecular Function: aspartyl esterase activity (GO:0045330);; Biological Process: pectin metabolic process (GO:0045488);;	K01051|0|vvi:100247362|pectinesterase 31; K01051 pectinesterase [EC:3.1.1.11] (A)	--	--	Pectinesterase;; Protein of unknown function (DUF1997)	Pectinesterase 31 GN=MXE2.5 OS=Arabidopsis thaliana (Mouse-ear cress) PE=1 SV=1	G	Carbohydrate transport and metabolism	PREDICTED: pectinesterase 31 [Vitis vinifera]	cellular component: cell (GO:0005623);; cellular component: cell part (GO:0044464);; biological process: metabolic process (GO:0008152);; molecular function: catalytic activity (GO:0003824);; biological process: cellular process (GO:0009987);; biological process: cellular component organization or biogenesis (GO:0071840)	Pentose and glucuronate interconversions (ko00040);; Starch and sucrose metabolism (ko00500)	1	p3	(TAA)5	15	1958	1972	TGCTTCAGTTCAAATCAGCTC	58.242	21	TCTTTGGCCTTTTCTGCTGT	59.993	20	134	1926	2059	TGCTTCAGTTCAAATCAGCTC	58.242	21
c70349.graph_c1	35.49	37.8	41.9	49.28	41.13	43.9	49.94	37.8	40.52	41.9733	4.71714	0.112384	0.15178	0.15178	0.182029	0.182029	0.0400882	0.0400882	--	--	--	--	--	--	--	--	--	--	--	--	--	--	--	--	--	--	--	--	--	--	--	--	--	--	--	--	--	--	--
c67028.graph_c2	34.45	37.04	33.05	41.42	32.04	36.03	36.74	36.35	35.75	35.8744	2.535	0.0706632	0.104991	0.104991	0.181527	0.181527	0.0883405	0.0883405	[GEPR]	--	Biological Process: carbohydrate transport (GO:0008643);; Cellular Component: integral component of membrane (GO:0016021);; Molecular Function: substrate-specific transmembrane transporter activity (GO:0022891);; Molecular Function: 2-alkenal reductase [NAD(P)] activity (GO:0032440);; Biological Process: transmembrane transport (GO:0055085);; Biological Process: oxidation-reduction process (GO:00…	--	[R]	General function prediction only	Sugar (and other) transporter	D-xylose-proton symporter-like 2 GN=At5g17010 OS=Arabidopsis thaliana (Mouse-ear cress) PE=1 SV=1	R	General function prediction only	unknown [Populus trichocarpa]	biological process: single-organism process (GO:0044699);; biological process: localization (GO:0051179);; cellular component: membrane (GO:0016020);; cellular component: membrane part (GO:0044425);; biological process: cellular process (GO:0009987);; molecular function: transporter activity (GO:0005215);; biological process: metabolic process (GO:0008152);; molecular function: catalytic activity…	--	3	p1	(A)10	10	3527	3536	CCATGTTTGATTTTACCGCA	59.42	20	TGATAAACTACCGGGAACGG	59.817	20	175	3490	3664	CCATGTTTGATTTTACCGCA	59.42	20
c39778.graph_c0	26.83	18.5	18.3	24.53	19.08	22.38	20.83	25.49	20	21.7711	3.00773	0.138152	0.108664	0.108664	0.181502	0.181502	0.083832	0.083832	[R]	General function prediction only	Molecular Function: nucleotide binding (GO:0000166);; Molecular Function: RNA binding (GO:0003723);; Cellular Component: chloroplast (GO:0009507);;	--	[R]	General function prediction only	RNA recognition motif. (a.k.a. RRM, RBD, or RNP domain);; RNA recognition motif (a.k.a. RRM, RBD, or RNP domain);; RNA recognition motif. (a.k.a. RRM, RBD, or RNP domain)	Glycine-rich RNA-binding protein blt801 {ECO:0000250|UniProtKB:Q03250, ECO:0000303|PubMed:8639753} OS=Hordeum vulgare (Barley) PE=1 SV=1	R	General function prediction only	PREDICTED: glycine-rich RNA-binding protein 3, mitochondrial [Prunus mume]	molecular function: binding (GO:0005488);; cellular component: cell (GO:0005623);; cellular component: organelle (GO:0043226);; cellular component: cell part (GO:0044464)	--	--	--	--	--	--	--	--	--	--	--	--	--	--	--	--	--	--	--
c58467.graph_c1	13.39	11.64	10.93	12.3	13.66	13.14	14.45	11.7	11.35	12.5067	1.13316	0.0906042	0.167781	0.167781	0.181487	0.181487	0.0224384	0.0224384	[O]	Posttranslational modification, protein turnover, chaperones	--	K14826|3.19551e-143|tcc:TCM_014983|FK506-binding protein, putative isoform 1; K14826 FK506-binding nuclear protein [EC:5.2.1.8] (A)	[O]	Posttranslational modification, protein turnover, chaperones	FKBP-type peptidyl-prolyl cis-trans isomerase	Peptidyl-prolyl cis-trans isomerase FKBP53 GN=FKBP53 OS=Arabidopsis thaliana (Mouse-ear cress) PE=1 SV=1	O	Posttranslational modification, protein turnover, chaperones	Peptidyl-prolyl cis-trans isomerase FKBP53 [Morus notabilis]	--	--	1	p3	(AAG)5	15	947	961	AAAAGATGGGGGCCATAAAG	60.143	20	TTTCATCCTCCACATGGACA	59.893	20	173	867	1039	AAAAGATGGGGGCCATAAAG	60.143	20
c69905.graph_c0	362.25	367.41	381.17	287.79	307.93	301.83	314.87	271.54	322.94	324.192	35.7662	0.110324	-0.198366	0.198366	-0.181471	0.181471	0.0266866	0.0266866	--	--	Biological Process: mitotic G2 phase (GO:0000085);; Biological Process: double-strand break repair via homologous recombination (GO:0000724);; Biological Process: DNA replication initiation (GO:0006270);; Biological Process: regulation of DNA replication (GO:0006275);; Biological Process: DNA methylation (GO:0006306);; Biological Process: chromatin silencing (GO:0006342);; Biological Process: sis…	--	--	--	--	--	S	Function unknown	PREDICTED: uncharacterized protein LOC100245146 isoform X1 [Vitis vinifera]	biological process: biological phase (GO:0044848);; biological process: metabolic process (GO:0008152);; biological process: cellular process (GO:0009987);; biological process: single-organism process (GO:0044699);; biological process: response to stimulus (GO:0050896);; biological process: biological regulation (GO:0065007);; biological process: cellular component organization or biogenesis (GO:…	--	--	--	--	--	--	--	--	--	--	--	--	--	--	--	--	--	--	--
c51770.graph_c0	123.46	133.64	137.78	123.08	133.37	129.36	125.43	101.04	97.81	122.774	13.342	0.108671	0.00924396	0.00924396	-0.181335	0.181335	-0.181389	0.181389	--	--	--	--	[T]	Signal transduction mechanisms	--	--	T	Signal transduction mechanisms	hypothetical protein PRUPE_ppa010837mg [Prunus persica]	--	--	1	p3	(TTA)5	15	35	49	TTTCGCTCAAACAACTCCAA	59.439	20	TTTCAATCACTGTGGGCAAG	59.691	20	260	4	263	TTCGCTCAAACAACTCCAAA	59.439	20
c63672.graph_c0	125.72	120.64	132.12	128.7	132.91	121.99	129.92	147.32	123.02	129.149	7.65165	0.0592468	0.0453124	0.0453124	0.180899	0.180899	0.145213	0.145213	--	--	--	--	[S]	Function unknown	Thioredoxin	5&apos;-adenylylsulfate reductase-like 4 (Precursor) GN=APRL4 OS=Arabidopsis thaliana (Mouse-ear cress) PE=2 SV=1	O	Posttranslational modification, protein turnover, chaperones	thioredoxin-related family protein [Populus trichocarpa]	--	--	2	p1	(A)10	10	1981	1990	ATATGGGGCCAATGTTGTGT	59.939	20	GGACCTGGCCAACTGTAAAA	59.971	20	217	1847	2063	ATATGGGGCCAATGTTGTGT	59.939	20
c69565.graph_c1	18.32	15.65	19.67	16.76	16.08	19.61	15.95	14.25	17.65	17.1044	1.74481	0.102009	-0.146468	0.146468	-0.180482	0.180482	-0.0243766	0.0243766	[E]	Amino acid transport and metabolism	Molecular Function: serine-type endopeptidase activity (GO:0004252);; Biological Process: proteolysis (GO:0006508);;	--	[O]	Posttranslational modification, protein turnover, chaperones	Prolyl oligopeptidase, N-terminal beta-propeller domain;; Prolyl oligopeptidase family;; Prolyl oligopeptidase family	--	O	Posttranslational modification, protein turnover, chaperones	PREDICTED: prolyl endopeptidase-like [Malus domestica]	biological process: metabolic process (GO:0008152);; molecular function: catalytic activity (GO:0003824)	--	1	p1	(A)10	10	2691	2700	ATGGGAAATCCCTTCTTGCT	59.903	20	TTCTTTCTTTCTTTCGCCCTC	59.952	21	267	2483	2749	TCATGGGAAATCCCTTCTTG	59.864	20
c67580.graph_c0	92.71	97.98	114.65	96.25	102.22	106.96	113.52	93.49	100.16	101.993	7.6646	0.0751481	0.0457199	0.0457199	0.180208	0.180208	0.143803	0.143803	--	--	Molecular Function: binding (GO:0005488);;	--	--	--	PHD-finger;; BAH domain	PHD finger protein At3g20280 GN=At3g20280 OS=Arabidopsis thaliana (Mouse-ear cress) PE=2 SV=1	R	General function prediction only	RING/FYVE/PHD zinc finger superfamily protein, putative isoform 2 [Theobroma cacao]	molecular function: binding (GO:0005488)	--	3	p1	(A)12	12	3120	3131	GCAAATAAACAATTATTGCCACA	58.965	23	GATTTTTCGGTGTTCTGGGA	59.91	20	202	3002	3203	GCAAATAAACAATTATTGCCACA	58.965	23
c61043.graph_c0	11.17	17.64	12.65	12.33	12.08	15.27	10.77	9.74	13.45	12.7889	2.2816	0.178404	-0.0193454	0.0193454	-0.179268	0.179268	-0.147531	0.147531	[F]	Nucleotide transport and metabolism	Molecular Function: cytidine deaminase activity (GO:0004126);; Cellular Component: nucleus (GO:0005634);; Cellular Component: cytosol (GO:0005829);; Molecular Function: zinc ion binding (GO:0008270);; Biological Process: cytidine deamination (GO:0009972);;	K01489|6.08424e-142|tcc:TCM_037679|Cytidine deaminase; K01489 cytidine deaminase [EC:3.5.4.5] (A)	[F]	Nucleotide transport and metabolism	Cytidine and deoxycytidylate deaminase zinc-binding region;; Cytidine and deoxycytidylate deaminase zinc-binding region	Cytidine deaminase 1 GN=F3P11 OS=Arabidopsis thaliana (Mouse-ear cress) PE=1 SV=1	F	Nucleotide transport and metabolism	Cytidine deaminase [Theobroma cacao]	biological process: metabolic process (GO:0008152);; biological process: cellular process (GO:0009987);; biological process: single-organism process (GO:0044699);; molecular function: catalytic activity (GO:0003824);; cellular component: cell (GO:0005623);; cellular component: organelle (GO:0043226);; cellular component: cell part (GO:0044464);; molecular function: binding (GO:0005488)	Pyrimidine metabolism (ko00240)	--	--	--	--	--	--	--	--	--	--	--	--	--	--	--	--	--	--
c60620.graph_c0	29.75	32.28	28.49	28.02	33.15	34.69	28.26	34.39	31.16	31.1322	2.48301	0.0797568	0.120248	0.120248	0.179158	0.179158	0.0693214	0.0693214	[I]	Lipid transport and metabolism	Molecular Function: acetyl-CoA carboxylase activity (GO:0003989);; Molecular Function: biotin carboxylase activity (GO:0004075);; Molecular Function: ATP binding (GO:0005524);; Biological Process: fatty acid biosynthetic process (GO:0006633);; Cellular Component: chloroplast stroma (GO:0009570);; Cellular Component: chloroplast envelope (GO:0009941);; Molecular Function: metal ion binding (GO:004…	K01961|0|pop:POPTR_0006s07780g|POPTRDRAFT_831870; biotin carboxylase precursor family protein; K01961 acetyl-CoA carboxylase, biotin carboxylase subunit [EC:6.4.1.2 6.3.4.14] (A)	[IE]	--	Carbamoyl-phosphate synthase L chain, ATP binding domain;; Carbamoyl-phosphate synthase L chain, N-terminal domain;; Biotin carboxylase C-terminal domain;; ATP-grasp domain;; ATP-grasp domain;; D-ala D-ala ligase C-terminus;; RimK-like ATP-grasp domain	Biotin carboxylase 1, chloroplastic (Precursor) GN=POPTRDRAFT_831870 OS=Populus trichocarpa (Western balsam poplar) PE=2 SV=1	C	Energy production and conversion	biotin carboxylase [Vernicia fordii]	biological process: metabolic process (GO:0008152);; molecular function: catalytic activity (GO:0003824);; molecular function: binding (GO:0005488);; biological process: cellular process (GO:0009987);; biological process: single-organism process (GO:0044699);; cellular component: cell (GO:0005623);; cellular component: organelle (GO:0043226);; cellular component: organelle part (GO:0044422);; cel…	Fatty acid biosynthesis (ko00061);; Pyruvate metabolism (ko00620);; Propanoate metabolism (ko00640);; Carbon metabolism (ko01200);; Fatty acid metabolism (ko01212)	1	p1	(A)15	15	173	187	CAATTTTGACTTATTTCCAACGC	59.898	23	ATGGGGAGGGTATCTCTGCT	59.919	20	213	23	235	CAATTTTGACTTATTTCCAACGC	59.898	23
c71445.graph_c0	56.52	63.96	64.1	53.35	66.42	63.24	64.42	67.13	59.08	62.0244	4.40798	0.0710685	-0.00537399	0.00537399	0.178544	0.178544	0.193476	0.193476	--	--	--	--	--	--	--	--	--	--	--	--	--	2	p1	(T)11	11	5265	5275	CATGGAGATCCATATTGGGG	59.968	20	CAGAATCTCGCTCTCATCACA	59.128	21	248	5088	5335	TGTTGTGTTGTGAGCATGGA	59.705	20
c68881.graph_c2	32.75	31.45	34.02	28.8	26.86	29.5	24.38	27.54	26.52	29.0911	2.97558	0.102285	-0.107899	0.107899	-0.178375	0.178375	-0.0597771	0.0597771	[Q]	Secondary metabolites biosynthesis, transport and catabolism	Molecular Function: lipid transporter activity (GO:0005319);; Biological Process: lipid transport (GO:0006869);; Cellular Component: chloroplast inner membrane (GO:0009706);; Cellular Component: chloroplast outer membrane (GO:0009707);; Biological Process: methylglyoxal catabolic process to D-lactate (GO:0019243);;	--	--	--	Permease	Protein TRIGALACTOSYLDIACYLGLYCEROL 1, chloroplastic (Precursor) GN=F14P1.27 OS=Arabidopsis thaliana (Mouse-ear cress) PE=1 SV=1	P	Inorganic ion transport and metabolism	Trigalactosyldiacylglycerol 1 isoform 3 [Theobroma cacao]	biological process: single-organism process (GO:0044699);; biological process: localization (GO:0051179);; molecular function: transporter activity (GO:0005215);; cellular component: cell (GO:0005623);; cellular component: membrane (GO:0016020);; cellular component: organelle (GO:0043226);; cellular component: organelle part (GO:0044422);; cellular component: cell part (GO:0044464);; biological p…	--	1	p1	(T)11	11	470	480	TTTCTCAGGCAACATCCAAA	59.247	20	TGTTGTTTCTTCCAGGGAGC	60.232	20	182	416	597	TTTTCTCAGGCAACATCCAA	59.247	20
c55406.graph_c0	9.84	9.33	8.63	8.23	8.2	9.2	6.66	8.02	7.94	8.45	0.885776	0.104826	-0.0716902	0.0716902	-0.178129	0.178129	-0.0956048	0.0956048	--	--	Molecular Function: binding (GO:0005488);;	K14649|2.2232e-157|vvi:100260255|transcription initiation factor TFIID subunit 8; K14649 transcription initiation factor TFIID subunit 8 (A)	[K]	Transcription	Bromodomain associated;; Transcription factor TFIID complex subunit 8 C-term;; Auxin responsive protein	Transcription initiation factor TFIID subunit 8 GN=TAF8 OS=Arabidopsis thaliana (Mouse-ear cress) PE=1 SV=1	K	Transcription	PREDICTED: transcription initiation factor TFIID subunit 8 [Vitis vinifera]	molecular function: binding (GO:0005488)	Basal transcription factors (ko03022)	--	--	--	--	--	--	--	--	--	--	--	--	--	--	--	--	--	--
c68252.graph_c4	88.11	77.92	72.1	79.14	67.23	84.23	52.5	79.36	86.45	76.3378	10.4975	0.137513	-0.161716	0.161716	-0.177959	0.177959	-0.00357737	0.00357737	[RTKL]	--	Biological Process: MAPK cascade (GO:0000165);; Molecular Function: nucleotide binding (GO:0000166);; Molecular Function: protein serine/threonine kinase activity (GO:0004674);; Biological Process: protein phosphorylation (GO:0006468);; Biological Process: response to osmotic stress (GO:0006970);;	K13414|1.31183e-134|tcc:TCM_035015|Mitogen-activated protein kinase kinase kinase 1, putative isoform 1; K13414 mitogen-activated protein kinase kinase kinase 1, plant [EC:2.7.11.25] (A)	[T]	Signal transduction mechanisms	Protein kinase domain;; Protein tyrosine kinase;; Protein kinase domain	Mitogen-activated protein kinase kinase kinase 1 GN=MEKK1 OS=Arabidopsis thaliana (Mouse-ear cress) PE=1 SV=2	T	Signal transduction mechanisms	Mitogen-activated protein kinase kinase kinase 1, putative isoform 2 [Theobroma cacao]	biological process: metabolic process (GO:0008152);; biological process: cellular process (GO:0009987);; biological process: signaling (GO:0023052);; biological process: single-organism process (GO:0044699);; biological process: response to stimulus (GO:0050896);; biological process: biological regulation (GO:0065007);; molecular function: binding (GO:0005488);; molecular function: catalytic acti…	Plant-pathogen interaction (ko04626)	1	p3	(TTC)5	15	1754	1768	ACGAACATGACTCCAAAGCC	60.119	20	CGATAATGGCTGTTCCGTTT	59.96	20	194	1668	1861	CACACTCTCTTCCGCCTCTC	60.135	20
c70016.graph_c0	20.67	20.72	20.62	21.37	20.17	20.4	18.62	15.37	16.33	19.3633	2.01604	0.104116	0.0258744	0.0258744	-0.177551	0.177551	-0.193548	0.193548	--	--	--	--	--	--	GDP-fucose protein O-fucosyltransferase	Uncharacterized protein At1g04910 GN=At1g04910 OS=Arabidopsis thaliana (Mouse-ear cress) PE=2 SV=1	S	Function unknown	PREDICTED: uncharacterized protein At1g04910 [Sesamum indicum]	--	--	--	--	--	--	--	--	--	--	--	--	--	--	--	--	--	--	--	--
c64968.graph_c1	35.73	34.38	37.28	35.52	35.9	36.03	39.47	38.12	35.32	36.4167	1.49117	0.0409474	0.0447976	0.0447976	0.177265	0.177265	0.14216	0.14216	--	--	--	--	[S]	Function unknown	Telomere stability and silencing;; Ubiquitin family	--	S	Function unknown	PREDICTED: LOW QUALITY PROTEIN: protein SDE2 homolog [Malus domestica]	--	--	1	c	(AT)6tgagaatcagaaccttttaatgtgactgctataattgcttcttttttc(T)10	70	736	805	TCTGGACCTGAAGCAACTCA	59.545	20	TTAGGCCTTGGTTTGAATGC	60.074	20	256	610	865	TCTGGACCTGAAGCAACTCA	59.545	20
c69567.graph_c1	6.36	6.75	6.96	5.23	7.68	5.27	6.32	5.14	5.44	6.12778	0.854436	0.139437	-0.148048	0.148048	-0.177009	0.177009	-0.0219223	0.0219223	--	--	Biological Process: signal transduction (GO:0007165);; Molecular Function: zinc ion binding (GO:0008270);;	--	[K]	Transcription	--	--	O	Posttranslational modification, protein turnover, chaperones	hypothetical protein VITISV_015333 [Vitis vinifera]	biological process: cellular process (GO:0009987);; biological process: signaling (GO:0023052);; biological process: single-organism process (GO:0044699);; biological process: response to stimulus (GO:0050896);; biological process: biological regulation (GO:0065007);; molecular function: binding (GO:0005488)	--	3	p1	(A)14	14	1128	1141	TGATGTAGGTTGCAGGTCCA	60.112	20	AGCTCCAATTTCTTGGGTGA	59.67	20	233	1082	1314	GTAGGTTGCAGGTCCATGCT	60.142	20
c69775.graph_c0	83.34	73.26	72.05	58.37	64.92	67.14	55.22	63.52	58.78	66.2889	8.32936	0.125652	-0.0630762	0.0630762	-0.176958	0.176958	-0.104425	0.104425	--	--	Molecular Function: protein tyrosine phosphatase activity (GO:0004725);; Molecular Function: protein tyrosine/serine/threonine phosphatase activity (GO:0008138);; Biological Process: peptidyl-tyrosine dephosphorylation (GO:0035335);; Biological Process: negative regulation of MAP kinase activity (GO:0043407);;	--	[V]	Defense mechanisms	Dual specificity phosphatase, catalytic domain	Putative dual specificity protein phosphatase DSP8 GN=DSP8 OS=Arabidopsis thaliana (Mouse-ear cress) PE=2 SV=2	V	Defense mechanisms	PREDICTED: putative dual specificity protein phosphatase DSP8 [Vitis vinifera]	biological process: metabolic process (GO:0008152);; biological process: cellular process (GO:0009987);; molecular function: catalytic activity (GO:0003824);; biological process: biological regulation (GO:0065007)	--	--	--	--	--	--	--	--	--	--	--	--	--	--	--	--	--	--	--
c70827.graph_c0	26.11	23.28	23.52	24.02	23.92	23.69	19.15	21.4	19.41	22.7222	2.15922	0.0950267	-0.0494566	0.0494566	-0.176862	0.176862	-0.117754	0.117754	[J]	Translation, ribosomal structure and biogenesis	Molecular Function: structural constituent of ribosome (GO:0003735);; Cellular Component: ribosome (GO:0005840);; Biological Process: translation (GO:0006412);; Cellular Component: chloroplast (GO:0009507);;	K02959|4.45196e-35|tcc:ThcaC_p003|rps16; ribosomal protein S16; K02959 small subunit ribosomal protein S16 (A)	[J]	Translation, ribosomal structure and biogenesis	Plant protein of unknown function (DUF825)	30S ribosomal protein S16, chloroplastic {ECO:0000255|HAMAP-Rule:MF_00385} OS=Gossypium hirsutum (Upland cotton) PE=3 SV=1	J	Translation, ribosomal structure and biogenesis	ribosomal protein S16 (chloroplast) [Staphylea colchica]	molecular function: structural molecule activity (GO:0005198);; cellular component: cell (GO:0005623);; cellular component: macromolecular complex (GO:0032991);; cellular component: organelle (GO:0043226);; cellular component: cell part (GO:0044464);; biological process: metabolic process (GO:0008152);; biological process: cellular process (GO:0009987)	Ribosome (ko03010)	2	p1	(A)12	12	3076	3087	CGAATTGGATCCTTTCGATT	58.974	20	GTGCGACTTGAAGGACATGA	59.837	20	276	2923	3198	CCCTAGATCTCTGCCCTTGA	59.381	20
c67499.graph_c1	8.35	8.88	7.55	7.13	7.12	6.55	7.01	6.38	6.36	7.25889	0.822198	0.113268	-0.17828	0.17828	-0.176848	0.176848	0.0115472	0.0115472	[J]	Translation, ribosomal structure and biogenesis	Molecular Function: copper ion binding (GO:0005507);; Biological Process: translation (GO:0006412);; Molecular Function: methyltransferase activity (GO:0008168);; Biological Process: methylation (GO:0032259);;	--	[J]	Translation, ribosomal structure and biogenesis	Mitochondrial small ribosomal subunit Rsm22;; Mitochondrial small ribosomal subunit Rsm22	--	J	Translation, ribosomal structure and biogenesis	PREDICTED: methyltransferase-like protein 17, mitochondrial [Pyrus x bretschneideri]	molecular function: binding (GO:0005488);; biological process: metabolic process (GO:0008152);; biological process: cellular process (GO:0009987);; molecular function: catalytic activity (GO:0003824)	--	2	p1	(A)10	10	1891	1900	--	--	--	--	--	--	--	--	--	--	--	--
c72114.graph_c9	300.43	371.49	392.62	290.72	428.49	396.14	413.06	327.36	469.72	376.67	56.725	0.150596	0.148826	0.148826	0.17681	0.17681	0.0362126	0.0362126	[F]	Nucleotide transport and metabolism	Biological Process: RNA splicing, via endonucleolytic cleavage and ligation (GO:0000394);; Molecular Function: adenylate kinase activity (GO:0004017);; Biological Process: transcription from RNA polymerase II promoter (GO:0006366);; Biological Process: unidimensional cell growth (GO:0009826);; Molecular Function: oxidoreductase activity (GO:0016491);; Biological Process: nucleotide phosphorylatio…	K18532|2.88857e-91|cic:CICLE_v10029381mg|hypothetical protein; K18532 adenylate kinase [EC:2.7.4.3] (A)	[F]	Nucleotide transport and metabolism	AAA domain;; AAA domain;; ATPase family associated with various cellular activities (AAA);; Adenylate kinase	Adenylate kinase isoenzyme 6 homolog {ECO:0000255|HAMAP-Rule:MF_03173} GN=AAK6 OS=Arabidopsis thaliana (Mouse-ear cress) PE=1 SV=1	F	Nucleotide transport and metabolism	hypothetical protein CICLE_v10029381mg [Citrus clementina]	biological process: metabolic process (GO:0008152);; biological process: cellular process (GO:0009987);; biological process: single-organism process (GO:0044699);; molecular function: catalytic activity (GO:0003824);; biological process: developmental process (GO:0032502);; biological process: growth (GO:0040007);; biological process: cellular component organization or biogenesis (GO:0071840)	Purine metabolism (ko00230);; Ribosome biogenesis in eukaryotes (ko03008)	2	p2	(TA)6	12	686	697	CTGCTCGTCACAACTCTGGA	60.178	20	ATCAATGCAGCCGAAGAAAT	59.674	20	248	530	777	TGCTCGTCACAACTCTGGAA	60.593	20
c72594.graph_c1	69.81	83.67	87.72	84.35	72.02	73.06	81.4	78.57	74.59	78.3544	5.93083	0.0756923	0.0621263	0.0621263	0.176763	0.176763	0.125468	0.125468	--	--	--	--	--	--	--	Mediator of RNA polymerase II transcription subunit 16 GN=T1J1.2 OS=Arabidopsis thaliana (Mouse-ear cress) PE=1 SV=1	S	Function unknown	PREDICTED: mediator of RNA polymerase II transcription subunit 16-like isoform X2 [Citrus sinensis]	--	--	1	p1	(A)15	15	1182	1196	CCTTCATAGGCAAATCACCAA	59.946	21	GCCAAGATTGGGTTCTGGTA	59.933	20	207	1145	1351	CCTTCATAGGCAAATCACCAA	59.946	21
c57059.graph_c0	14.97	20.35	14.36	15.94	14.49	13.97	16.8	11.41	14.6	15.21	2.28835	0.15045	-0.125274	0.125274	-0.176534	0.176534	-0.0404047	0.0404047	--	--	--	--	[R]	General function prediction only	C2 domain	Elicitor-responsive protein 3 OS=Oryza sativa subsp. japonica (Rice) PE=2 SV=1	R	General function prediction only	PREDICTED: elicitor-responsive protein 3 [Prunus mume]	--	--	--	--	--	--	--	--	--	--	--	--	--	--	--	--	--	--	--	--
c67622.graph_c2	32.52	26.54	28.75	27.88	25.29	32.02	24.5	25.38	26.73	27.7344	2.72307	0.0981837	0.0463453	0.0463453	0.176092	0.176092	0.140792	0.140792	[K]	Transcription	Biological Process: regulation of transcription, DNA-templated (GO:0006355);; Biological Process: multicellular organismal development (GO:0007275);; Biological Process: isoprenoid biosynthetic process (GO:0008299);; Cellular Component: plastid (GO:0009536);; Biological Process: plastid organization (GO:0009657);; Molecular Function: sigma factor activity (GO:0016987);;	--	--	--	Sigma-70 region 3;; Sigma-70 region 2;; Sigma-70, region 4	RNA polymerase sigma factor sigF, chloroplastic (Precursor) GN=T1J8 OS=Arabidopsis thaliana (Mouse-ear cress) PE=1 SV=1	K	Transcription	PREDICTED: RNA polymerase sigma factor sigF, chloroplastic [Prunus mume]	biological process: biological regulation (GO:0065007);; biological process: multicellular organismal process (GO:0032501);; biological process: developmental process (GO:0032502);; biological process: single-organism process (GO:0044699);; biological process: metabolic process (GO:0008152);; biological process: cellular process (GO:0009987);; cellular component: cell (GO:0005623);; cellular comp…	--	1	p1	(T)11	11	42	52	--	--	--	--	--	--	--	--	--	--	--	--
c68163.graph_c0	59.77	48.15	55	48.38	50.6	51.16	52.36	39.64	39.26	49.3689	6.26159	0.126833	-0.0361926	0.0361926	-0.175968	0.175968	-0.131198	0.131198	[O]	Posttranslational modification, protein turnover, chaperones	--	--	[O]	Posttranslational modification, protein turnover, chaperones	X-domain of DnaJ-containing;; DnaJ domain	Chaperone protein dnaJ 10 GN=F28O16.7 OS=Arabidopsis thaliana (Mouse-ear cress) PE=2 SV=2	O	Posttranslational modification, protein turnover, chaperones	PREDICTED: chaperone protein dnaJ 10 [Prunus mume]	--	--	--	--	--	--	--	--	--	--	--	--	--	--	--	--	--	--	--	--
c65558.graph_c2	33.28	35.96	31.38	31.49	37.91	34.72	31.01	30.47	31.12	33.0378	2.46517	0.0746167	0.0232462	0.0232462	-0.175701	0.175701	-0.189215	0.189215	--	--	Molecular Function: sulfotransferase activity (GO:0008146);;	--	--	--	--	--	S	Function unknown	conserved hypothetical protein [Ricinus communis]	biological process: metabolic process (GO:0008152);; molecular function: catalytic activity (GO:0003824)	--	1	p1	(T)12	12	630	641	GGGCCATATTTGGGATTTCT	59.984	20	TGCAGAATTGAGGGAGGAAC	60.195	20	264	487	750	CATGGGCTCTTCAACAGTCA	59.831	20
c72212.graph_c0	56.68	50.13	60.2	60.57	44.94	47.78	49.29	41.15	47.6	50.9267	6.39266	0.125527	-0.030255	0.030255	-0.175575	0.175575	-0.134705	0.134705	--	--	--	--	[O]	Posttranslational modification, protein turnover, chaperones	Protein of unknown function (DUF1117);; zinc-finger;; Ring finger domain;; RING-H2 zinc finger;; Zinc finger, C3HC4 type (RING finger)	E3 ubiquitin-protein ligase RING1 GN=RING1 OS=Gossypium hirsutum (Upland cotton) PE=1 SV=1	O	Posttranslational modification, protein turnover, chaperones	PREDICTED: E3 ubiquitin-protein ligase RING1-like [Cucumis sativus]	--	--	1	p2	(TG)7	14	669	682	TCCCCCTTCAGCCTACTTGT	61.008	20	AACGTTGAATCATCCAAGTGC	59.992	21	273	454	726	CTCCCCCTTCAGCCTACTTG	61.131	20
c71716.graph_c2	28.24	34.69	30.44	35.03	38.42	33.65	35.26	30.1	37	33.6478	3.19249	0.0948798	0.164296	0.164296	0.175532	0.175532	0.0213625	0.0213625	--	--	Biological Process: maltose metabolic process (GO:0000023);; Biological Process: starch catabolic process (GO:0005983);; Biological Process: protein dephosphorylation (GO:0006470);; Molecular Function: protein tyrosine/serine/threonine phosphatase activity (GO:0008138);; Cellular Component: chloroplast stroma (GO:0009570);; Biological Process: starch biosynthetic process (GO:0019252);; Cellular C…	--	[G]	Carbohydrate transport and metabolism	Uncharacterised conserved protein (DUF2372);; Dual specificity phosphatase, catalytic domain	Phosphoglucan phosphatase LSF1, chloroplastic (Precursor) GN=F4P13.6 OS=Arabidopsis thaliana (Mouse-ear cress) PE=1 SV=1	V	Defense mechanisms	PREDICTED: phosphoglucan phosphatase LSF1, chloroplastic isoform X2 [Cucumis melo]	biological process: metabolic process (GO:0008152);; biological process: cellular process (GO:0009987);; biological process: single-organism process (GO:0044699);; molecular function: catalytic activity (GO:0003824);; cellular component: cell (GO:0005623);; cellular component: organelle (GO:0043226);; cellular component: organelle part (GO:0044422);; cellular component: cell part (GO:0044464);; b…	--	1	p1	(T)13	13	1185	1197	TTCTCTGTGTTGGGTTTCCC	59.943	20	CTTCGCCGCCTTGAGTATAG	59.996	20	140	1098	1237	TTTCTGGGTGGGCTGTTTAG	60.103	20
c69066.graph_c1	43.19	49.15	58.45	43.53	58.43	49.7	49.41	54.84	45.73	50.27	5.50623	0.109533	0.0781187	0.0781187	0.175141	0.175141	0.105925	0.105925	--	--	Molecular Function: protein kinase activity (GO:0004672);; Molecular Function: ATP binding (GO:0005524);; Cellular Component: vacuole (GO:0005773);; Biological Process: protein phosphorylation (GO:0006468);; Biological Process: response to abscisic acid (GO:0009737);; Biological Process: brassinosteroid mediated signaling pathway (GO:0009742);; Cellular Component: cytoplasmic side of plasma membr…	K14500|1.2646e-138|pop:POPTR_0009s14480g|POPTRDRAFT_1086284; kinase family protein; K14500 BR-signaling kinase [EC:2.7.11.1] (A)	--	--	Protein tyrosine kinase;; Protein tyrosine kinase;; Protein kinase domain	Probable serine/threonine-protein kinase At4g35230 GN=At4g35230 OS=Arabidopsis thaliana (Mouse-ear cress) PE=1 SV=1	T	Signal transduction mechanisms	kinase family protein [Populus trichocarpa]	biological process: metabolic process (GO:0008152);; biological process: cellular process (GO:0009987);; molecular function: catalytic activity (GO:0003824);; molecular function: binding (GO:0005488);; cellular component: cell (GO:0005623);; cellular component: organelle (GO:0043226);; cellular component: cell part (GO:0044464);; biological process: response to stimulus (GO:0050896);; biological …	Plant hormone signal transduction (ko04075)	--	--	--	--	--	--	--	--	--	--	--	--	--	--	--	--	--	--
c67183.graph_c0	20.81	14.27	18.56	21.62	23.36	17.54	21.73	19.11	17.93	19.4367	2.59791	0.13366	0.176654	0.176654	0.175071	0.175071	0.00590187	0.00590187	--	--	Biological Process: regulation of gene expression (GO:0010468);; Biological Process: cellular macromolecule metabolic process (GO:0044260);; Biological Process: nucleic acid metabolic process (GO:0090304);;	--	--	--	--	RNA-directed DNA methylation 4 GN=T9D9.9 OS=Arabidopsis thaliana (Mouse-ear cress) PE=1 SV=1	S	Function unknown	PREDICTED: RNA-directed DNA methylation 4 isoform X2 [Prunus mume]	biological process: biological regulation (GO:0065007);; biological process: metabolic process (GO:0008152);; biological process: cellular process (GO:0009987)	--	--	--	--	--	--	--	--	--	--	--	--	--	--	--	--	--	--	--
c64853.graph_c0	12.3	9.35	13.03	11.75	9.16	9.4	9.59	9.56	8.71	10.3167	1.4961	0.145018	-0.160737	0.160737	-0.174999	0.174999	-0.00434479	0.00434479	--	--	Biological Process: nitrogen compound metabolic process (GO:0006807);; Molecular Function: nickel cation binding (GO:0016151);;	K03190|3.08242e-55|vvi:100250903|urease accessory protein D; K03190 urease accessory protein (A)	--	--	--	Urease accessory protein D GN=URED OS=Arabidopsis thaliana (Mouse-ear cress) PE=2 SV=1	S	Function unknown	PREDICTED: urease accessory protein D [Vitis vinifera]	biological process: metabolic process (GO:0008152);; molecular function: binding (GO:0005488)	--	--	--	--	--	--	--	--	--	--	--	--	--	--	--	--	--	--	--
c51614.graph_c0	24.01	24.83	27.26	23.76	31.09	26.72	26.75	25.63	27.83	26.4311	2.1275	0.0804922	0.129707	0.129707	0.174426	0.174426	0.0531792	0.0531792	--	--	Molecular Function: motor activity (GO:0003774);; Cellular Component: plasma membrane (GO:0005886);; Biological Process: protein targeting to vacuole (GO:0006623);; Biological Process: membrane fusion (GO:0006944);; Biological Process: response to chitin (GO:0010200);; Cellular Component: myosin complex (GO:0016459);; Biological Process: Golgi vesicle transport (GO:0048193);;	--	--	--	Myosin tail	--	S	Function unknown	hypothetical protein CICLE_v10005800mg [Citrus clementina]	biological process: metabolic process (GO:0008152);; molecular function: catalytic activity (GO:0003824);; cellular component: cell (GO:0005623);; cellular component: membrane (GO:0016020);; cellular component: cell part (GO:0044464);; biological process: single-organism process (GO:0044699);; biological process: localization (GO:0051179);; biological process: response to stimulus (GO:0050896);; …	--	2	c	(T)11ccttttttaatattaatgttctcctgaag(T)11	51	1602	1652	GGAAGTTGAAGGTCTGTGCC	59.703	20	TGCAAGCGATTATCTGCAAC	59.983	20	226	1507	1732	TGCTGCTTCTGAATTGGTGA	60.539	20
c65643.graph_c1	10.71	11.91	13.6	13.78	13.04	12.21	17.78	12.95	12.59	13.1744	1.84907	0.140353	0.116126	0.116126	0.17408	0.17408	0.0674904	0.0674904	--	--	--	--	--	--	--	--	S	Function unknown	RPM1 interacting protein 13, putative isoform 1 [Theobroma cacao]	--	--	2	p1	(A)12	12	2515	2526	TTTTGGGATAAGCATCTGGG	59.894	20	CAAACACGAACACGAGCACT	59.946	20	177	2385	2561	ATCTGGGAATCGGGAAGAAG	60.401	20
c68247.graph_c0	45.74	41.79	37.4	43.91	42.33	41.31	44.43	44.15	44.24	42.8111	2.33449	0.0545301	-0.17597	0.17597	-0.173972	0.173972	0.0122637	0.0122637	[E]	Amino acid transport and metabolism	Molecular Function: protein serine/threonine kinase activity (GO:0004674);; Molecular Function: ATP binding (GO:0005524);; Cellular Component: cytosol (GO:0005829);; Biological Process: protein phosphorylation (GO:0006468);; Biological Process: positive regulation of translation (GO:0045727);;	K08856|3.94743e-151|pper:PRUPE_ppa008104mg|hypothetical protein; K08856 serine/threonine kinase 16 [EC:2.7.11.1] (A)	[KIT]	--	Protein kinase domain;; Protein tyrosine kinase;; Porphyromonas-type peptidyl-arginine deiminase;; Porphyromonas-type peptidyl-arginine deiminase;; Porphyromonas-type peptidyl-arginine deiminase	Agmatine deiminase GN=T22D6.110 OS=Arabidopsis thaliana (Mouse-ear cress) PE=1 SV=2	T	Signal transduction mechanisms	PREDICTED: serine/threonine-protein kinase 16 [Eucalyptus grandis]	biological process: metabolic process (GO:0008152);; biological process: cellular process (GO:0009987);; molecular function: catalytic activity (GO:0003824);; molecular function: binding (GO:0005488);; cellular component: cell (GO:0005623);; cellular component: cell part (GO:0044464);; biological process: biological regulation (GO:0065007)	--	4	p2	(TC)7	14	5418	5431	TGTCACAGGCTCAAACTTCG	60.025	20	AGTCCCTGGGGAAACTATCG	60.319	20	224	5231	5454	AGCAGGACTTGCACACACTG	60.096	20
c68170.graph_c0	19.06	16.44	15.27	18.73	19.07	18.48	18.06	18.21	17.38	17.8556	1.20934	0.0677293	0.164811	0.164811	0.173941	0.173941	0.0189927	0.0189927	--	--	Molecular Function: small GTPase regulator activity (GO:0005083);; Biological Process: protein N-linked glycosylation (GO:0006487);; Biological Process: protein targeting to vacuole (GO:0006623);; Biological Process: vacuole organization (GO:0007033);; Cellular Component: plasmodesma (GO:0009506);; Biological Process: embryo development ending in seed dormancy (GO:0009793);; Biological Process: v…	--	[U]	Intracellular trafficking, secretion, and vesicular transport	Vacuolar sorting protein 39 domain 2;; Vacuolar sorting protein 39 domain 1;; Region in Clathrin and VPS;; CNH domain	--	U	Intracellular trafficking, secretion, and vesicular transport	hypothetical protein [Arabidopsis thaliana]	biological process: biological regulation (GO:0065007);; molecular function: enzyme regulator activity (GO:0030234);; biological process: metabolic process (GO:0008152);; biological process: cellular process (GO:0009987);; biological process: single-organism process (GO:0044699);; biological process: localization (GO:0051179);; biological process: cellular component organization or biogenesis (GO…	--	1	p1	(A)10	10	2658	2667	TTCCAGTTAGGCTTGCGAGT	60.015	20	GGTATTCCTGGGGCACTTCT	60.328	20	200	2599	2798	TTCCAGTTAGGCTTGCGAGT	60.015	20
c67121.graph_c0	93.64	78.08	75.04	91.52	92.91	92.96	101.06	81.37	86.83	88.1567	7.99268	0.0906645	0.192634	0.192634	0.173708	0.173708	-0.0100373	0.0100373	--	--	Molecular Function: protein kinase activity (GO:0004672);; Molecular Function: ATP binding (GO:0005524);; Biological Process: protein phosphorylation (GO:0006468);; Cellular Component: integral component of membrane (GO:0016021);; Molecular Function: 2-alkenal reductase [NAD(P)] activity (GO:0032440);; Biological Process: oxidation-reduction process (GO:0055114);;	--	--	--	Protein kinase domain;; Protein tyrosine kinase	OTU domain-containing protein At3g57810 GN=At3g57810 OS=Arabidopsis thaliana (Mouse-ear cress) PE=2 SV=1	T	Signal transduction mechanisms	PREDICTED: OTU domain-containing protein At3g57810 [Vitis vinifera]	biological process: metabolic process (GO:0008152);; biological process: cellular process (GO:0009987);; molecular function: catalytic activity (GO:0003824);; molecular function: binding (GO:0005488);; cellular component: membrane (GO:0016020);; cellular component: membrane part (GO:0044425);; biological process: single-organism process (GO:0044699)	--	1	p1	(A)14	14	2060	2073	TTGTGGTCAGTCGGTGGTTA	60.001	20	TGCCTTGTTGGACAAAACTG	59.734	20	186	1928	2113	CACGAAAGACAATGTGGTGG	60.001	20
c62526.graph_c1	8.84	8.99	9.83	9.4	8.82	10.06	9.23	9.65	9.68	9.38889	0.422596	0.0450103	0.0950254	0.0950254	0.173399	0.173399	0.0889401	0.0889401	[L]	Replication, recombination and repair	--	K14442|0|pop:POPTR_0008s01470g|POPTRDRAFT_420510; hypothetical protein; K14442 ATP-dependent RNA helicase DHX36 [EC:3.6.4.13] (A)	[A]	RNA processing and modification	Helicase associated domain (HA2);; Oligonucleotide/oligosaccharide-binding (OB)-fold;; Helicase conserved C-terminal domain;; DEAD/DEAH box helicase;; Double-stranded RNA binding motif	Probable pre-mRNA-splicing factor ATP-dependent RNA helicase GN=At3g26560 OS=Arabidopsis thaliana (Mouse-ear cress) PE=1 SV=2	A	RNA processing and modification	PREDICTED: ATP-dependent RNA helicase DHX36 [Populus euphratica]	--	RNA degradation (ko03018)	--	--	--	--	--	--	--	--	--	--	--	--	--	--	--	--	--	--
c54769.graph_c0	259.93	217.09	224.27	167.25	291.74	249.82	221.75	273.76	239.66	238.363	34.455	0.144548	0.058187	0.058187	0.173307	0.173307	0.122533	0.122533	[T]	Signal transduction mechanisms	Cellular Component: plasma membrane (GO:0005886);; Biological Process: response to stress (GO:0006950);; Cellular Component: plasmodesma (GO:0009506);;	--	--	--	Universal stress protein family	Universal stress protein A-like protein GN=At3g01520 OS=Arabidopsis thaliana (Mouse-ear cress) PE=1 SV=2	S	Function unknown	PREDICTED: uncharacterized protein C167.05-like [Prunus mume]	cellular component: cell (GO:0005623);; cellular component: membrane (GO:0016020);; cellular component: cell part (GO:0044464);; biological process: response to stimulus (GO:0050896);; cellular component: cell junction (GO:0030054);; cellular component: symplast (GO:0055044)	--	--	--	--	--	--	--	--	--	--	--	--	--	--	--	--	--	--	--
c66934.graph_c0	22.68	21.32	19.25	22.16	19.82	20.67	20.66	19.74	21.56	20.8733	1.0907	0.0522532	0.0886192	0.0886192	0.172307	0.172307	0.0941379	0.0941379	[P]	Inorganic ion transport and metabolism	Molecular Function: potassium ion transmembrane transporter activity (GO:0015079);; Cellular Component: membrane (GO:0016020);; Biological Process: potassium ion transmembrane transport (GO:0071805);;	K03549|0|pop:POPTR_0010s10450g|POPTRDRAFT_805055; potassium transporter 12 family protein; K03549 KUP system potassium uptake protein (A)	--	--	K+ potassium transporter;; K+ potassium transporter;; K+ potassium transporter	Putative potassium transporter 12 GN=T13D8.5 OS=Arabidopsis thaliana (Mouse-ear cress) PE=1 SV=2	P	Inorganic ion transport and metabolism	PREDICTED: putative potassium transporter 12 isoform X2 [Populus euphratica]	biological process: cellular process (GO:0009987);; biological process: single-organism process (GO:0044699);; biological process: localization (GO:0051179);; molecular function: transporter activity (GO:0005215);; cellular component: membrane (GO:0016020)	--	1	p1	(T)10	10	353	362	AACCCACCATCCATCTCTTG	59.779	20	GACATTGCTAAACCCCCTGA	59.933	20	267	230	496	TTCAAAGAAACCCACCATCC	59.767	20
c41555.graph_c0	10.7	10.43	10.83	11.82	11.95	11.99	11.84	11.04	10.58	11.2422	0.610497	0.0543039	0.193239	0.193239	0.172222	0.172222	-0.0111391	0.0111391	--	--	--	--	[T]	Signal transduction mechanisms	Conserved mid region of cactin;; Cactus-binding C-terminus of cactin protein	Cactin GN=CTN OS=Arabidopsis thaliana (Mouse-ear cress) PE=1 SV=1	T	Signal transduction mechanisms	F21M11.16 protein isoform 1 [Theobroma cacao]	--	--	1	p1	(C)10	10	2402	2411	AGCTTGCTTGAGCAGTGTGA	59.929	20	CCAGAATCAAATTAGGGTCAAAA	59.382	23	256	2208	2463	GCTTGCTTGAGCAGTGTGAA	60.333	20
c70269.graph_c0	14.16	12.94	10.78	12.91	13.45	13.96	13.89	12.47	12.21	12.9744	1.0056	0.077506	0.148004	0.148004	0.172221	0.172221	0.034134	0.034134	[R]	General function prediction only	--	--	[T]	Signal transduction mechanisms	Rab-GTPase-TBC domain	--	T	Signal transduction mechanisms	PREDICTED: small G protein signaling modulator 1 isoform X2 [Prunus mume]	--	--	1	p1	(T)10	10	840	849	GAAACAGTGTGGCCTGTGAA	59.726	20	TTGTTGGGACACATAGGGTG	59.262	20	277	680	956	GAAACAGTGTGGCCTGTGAA	59.726	20
c58916.graph_c0	26.37	23.48	20.45	24.2	21.14	22.88	18.49	21.1	18.17	21.8089	2.52793	0.115913	0.00662156	0.00662156	-0.171946	0.171946	-0.167488	0.167488	[J]	Translation, ribosomal structure and biogenesis	Molecular Function: iron ion binding (GO:0005506);; Biological Process: translation (GO:0006412);; Molecular Function: formylmethionine deformylase activity (GO:0008463);; Biological Process: thylakoid membrane organization (GO:0010027);; Biological Process: isopentenyl diphosphate biosynthetic process, methylerythritol 4-phosphate pathway (GO:0019288);; Molecular Function: peptide deformylase ac…	K01462|6.45899e-146|vvi:100250707|peptide deformylase 1B, chloroplastic; K01462 peptide deformylase [EC:3.5.1.88] (A)	[J]	Translation, ribosomal structure and biogenesis	Polypeptide deformylase	Peptide deformylase 1B, chloroplastic/mitochondrial (Precursor) GN=T15N1_150 OS=Arabidopsis thaliana (Mouse-ear cress) PE=1 SV=2	J	Translation, ribosomal structure and biogenesis	PREDICTED: peptide deformylase 1B, chloroplastic [Vitis vinifera]	molecular function: binding (GO:0005488);; biological process: metabolic process (GO:0008152);; biological process: cellular process (GO:0009987);; molecular function: catalytic activity (GO:0003824);; biological process: single-organism process (GO:0044699);; biological process: cellular component organization or biogenesis (GO:0071840)	--	--	--	--	--	--	--	--	--	--	--	--	--	--	--	--	--	--	--
c65872.graph_c0	61.53	56.1	55.25	59.88	53.09	53.19	54.91	44.17	47.79	53.99	5.10721	0.0945955	-0.0413897	0.0413897	-0.171347	0.171347	-0.120125	0.120125	--	--	--	--	--	--	TFIIS helical bundle-like domain	Probable mediator of RNA polymerase II transcription subunit 26c GN=MYH9.6 OS=Arabidopsis thaliana (Mouse-ear cress) PE=1 SV=1	K	Transcription	Transcription elongation factor (TFIIS) family protein, putative isoform 1 [Theobroma cacao]	--	--	2	p1	(A)10	10	1756	1765	TTCCAGCAACCTTATGGAGG	60.066	20	CACCCTCCAAGGAAAATCAA	59.903	20	142	1659	1800	TTCCAGCAACCTTATGGAGG	60.066	20
c59973.graph_c1	14.92	16.96	17.03	17.16	15.8	14.8	14.7	15.67	16.7	15.9711	0.957769	0.0599688	0.116698	0.116698	0.171271	0.171271	0.0647264	0.0647264	[V]	Defense mechanisms	--	K05658|1.93705e-21|sly:101265632|ABC transporter B family member 6-like; K05658 ATP-binding cassette, subfamily B (MDR/TAP), member 1 [EC:3.6.3.44] (A)	[Q]	Secondary metabolites biosynthesis, transport and catabolism	--	ABC transporter B family member 20 GN=T26I12.200 OS=Arabidopsis thaliana (Mouse-ear cress) PE=1 SV=1	Q	Secondary metabolites biosynthesis, transport and catabolism	PREDICTED: ABC transporter B family member 6-like [Solanum lycopersicum]	--	ABC transporters (ko02010)	--	--	--	--	--	--	--	--	--	--	--	--	--	--	--	--	--	--
c71700.graph_c0	28.03	32.79	29.36	27.86	29.45	30.89	28.04	25.94	26.83	28.7989	1.97594	0.0686115	-0.0878765	0.0878765	-0.171263	0.171263	-0.0737118	0.0737118	--	--	Molecular Function: sequence-specific DNA binding transcription factor activity (GO:0003700);; Cellular Component: nucleus (GO:0005634);; Biological Process: regulation of transcription, DNA-templated (GO:0006355);; Molecular Function: sequence-specific DNA binding (GO:0043565);;	--	--	--	DDT domain;; Homeobox domain;; HB1, ASXL, restriction endonuclease HTH domain;; WSTF, HB1, Itc1p, MBD9 motif 1;; WSTF, HB1, Itc1p, MBD9 motif 2	--	R	General function prediction only	hypothetical protein CISIN_1g000279mg [Citrus sinensis]	biological process: biological regulation (GO:0065007);; molecular function: nucleic acid binding transcription factor activity (GO:0001071);; cellular component: cell (GO:0005623);; cellular component: organelle (GO:0043226);; cellular component: cell part (GO:0044464);; molecular function: binding (GO:0005488)	--	2	p1	(T)10	10	7366	7375	GCGTGTCAATGGGTCAGATA	59.527	20	TTTGCACCACAAAAATCAAGA	59.192	21	108	7322	7429	TGTAAGAACGTGTGTGCGTG	59.373	20
c72413.graph_c0	10.88	11.11	16.02	14.72	12.13	10.7	13.62	12.28	14.52	12.8867	1.804	0.13999	0.025184	0.025184	0.171095	0.171095	0.156079	0.156079	--	--	--	--	--	--	Plant specific eukaryotic initiation factor 4B	--	--	--	--	--	--	--	--	--	--	--	--	--	--	--	--	--	--	--	--	--	--	--	--
c64821.graph_c0	31.15	27.88	32.19	28.74	31.52	37.71	33.64	29.43	31.65	31.5456	2.76392	0.0876169	0.146598	0.146598	0.170904	0.170904	0.0335838	0.0335838	--	--	Cellular Component: proteasome complex (GO:0000502);; Cellular Component: nucleus (GO:0005634);; Molecular Function: enzyme regulator activity (GO:0030234);; Biological Process: regulation of protein catabolic process (GO:0042176);; Biological Process: regulation of catalytic activity (GO:0050790);;	K03033|0|vvi:100264130|probable 26S proteasome non-ATPase regulatory subunit 3; K03033 26S proteasome regulatory subunit N3 (A)	[O]	Posttranslational modification, protein turnover, chaperones	Proteasome regulatory subunit C-terminal;; PCI domain	Probable 26S proteasome non-ATPase regulatory subunit 3 GN=21D7 OS=Daucus carota (Wild carrot) PE=1 SV=2	O	Posttranslational modification, protein turnover, chaperones	hypothetical protein JCGZ_18844 [Jatropha curcas]	cellular component: cell (GO:0005623);; cellular component: macromolecular complex (GO:0032991);; cellular component: cell part (GO:0044464);; cellular component: organelle (GO:0043226);; biological process: biological regulation (GO:0065007);; molecular function: enzyme regulator activity (GO:0030234)	Proteasome (ko03050)	--	--	--	--	--	--	--	--	--	--	--	--	--	--	--	--	--	--
c65417.graph_c1	13.93	11.26	7.64	11.56	12.63	9.9	10.42	9.79	12.87	11.1111	1.80459	0.162413	0.0445363	0.0445363	0.170323	0.170323	0.135424	0.135424	--	--	--	--	[L]	Replication, recombination and repair	DDE superfamily endonuclease;; Plant transposon protein	--	L	Replication, recombination and repair	CAI-1 autoinducer sensor kinase/phosphatase cqsS isoform 2 [Theobroma cacao]	--	--	--	--	--	--	--	--	--	--	--	--	--	--	--	--	--	--	--	--
c52057.graph_c0	23.38	22.27	25.89	22.59	19.64	19.44	20.3	19.27	19.45	21.3589	2.17886	0.102012	-0.170595	0.170595	-0.170206	0.170206	0.0105683	0.0105683	--	--	--	K13206|7.31775e-105|cmo:103492150|nuclear speckle splicing regulatory protein 1-like; K13206 coiled-coil domain-containing protein 55 (A)	[S]	Function unknown	Coiled-coil domain-containing protein 55 (DUF2040)	--	S	Function unknown	hypothetical protein JCGZ_10865 [Jatropha curcas]	--	--	1	p2	(CA)6	12	988	999	GACTCTTCACTTCCTCCCCC	60.05	20	GCAGCTTGACAAACCAGACA	60.032	20	126	964	1089	CAGAAAAACCTTCACCGGAA	60.081	20
c69092.graph_c0	25.56	20.18	20.87	25.24	20.39	24.22	26.92	22.02	23.29	23.1878	2.32031	0.100066	0.0668772	0.0668772	0.17017	0.17017	0.114012	0.114012	[T]	Signal transduction mechanisms	Molecular Function: ATP binding (GO:0005524);; Molecular Function: 1-phosphatidylinositol-4-phosphate 5-kinase activity (GO:0016308);; Biological Process: phosphatidylinositol phosphorylation (GO:0046854);;	K00889|0|pop:POPTR_0001s21870g|POPTRDRAFT_548747; phosphatidylinositol-4-phosphate 5-kinase family protein; K00889 1-phosphatidylinositol-4-phosphate 5-kinase [EC:2.7.1.68] (A)	[T]	Signal transduction mechanisms	MORN repeat;; Phosphatidylinositol-4-phosphate 5-Kinase;; Phosphatidylinositol-4-phosphate 5-Kinase	Phosphatidylinositol 4-phosphate 5-kinase 8 GN=PIP5K8 OS=Arabidopsis thaliana (Mouse-ear cress) PE=1 SV=1	S	Function unknown	phosphatidylinositol-4-phosphate 5-kinase family protein [Populus trichocarpa]	molecular function: binding (GO:0005488);; biological process: metabolic process (GO:0008152);; biological process: cellular process (GO:0009987);; biological process: single-organism process (GO:0044699);; molecular function: catalytic activity (GO:0003824)	Inositol phosphate metabolism (ko00562);; Phosphatidylinositol signaling system (ko04070);; Endocytosis (ko04144)	--	--	--	--	--	--	--	--	--	--	--	--	--	--	--	--	--	--
c56018.graph_c1	73.87	64.38	68.3	68.51	66.62	74.15	76.85	70	67.84	70.0578	3.82791	0.0546394	0.0644945	0.0644945	0.170012	0.170012	0.115255	0.115255	--	--	Molecular Function: serine-type endopeptidase inhibitor activity (GO:0004867);; Molecular Function: transferase activity (GO:0016740);;	K13963|1.37271e-60|tcc:TCM_033920|Serine protease inhibitor (SERPIN) family protein; K13963 serpin B (A)	[V]	Defense mechanisms	Serpin (serine protease inhibitor)	Serpin-ZX GN=At1g47710 OS=Arabidopsis thaliana (Mouse-ear cress) PE=1 SV=1	V	Defense mechanisms	Serine protease inhibitor (SERPIN) family protein [Theobroma cacao]	biological process: biological regulation (GO:0065007);; molecular function: enzyme regulator activity (GO:0030234);; biological process: metabolic process (GO:0008152);; molecular function: catalytic activity (GO:0003824)	--	--	--	--	--	--	--	--	--	--	--	--	--	--	--	--	--	--	--
c68870.graph_c1	51.93	59.83	60.92	57.22	61.11	63.15	52.67	52.84	55.79	57.2733	3.95375	0.069033	0.0326087	0.0326087	-0.169915	0.169915	-0.192631	0.192631	[K]	Transcription	Molecular Function: RNA binding (GO:0003723);; Molecular Function: ribonuclease activity (GO:0004540);;	K18758|0|vvi:100260740|DIS3-like exonuclease 2; K18758 DIS3-like exonuclease 2 [EC:3.1.13.-] (A)	[J]	Translation, ribosomal structure and biogenesis	RNB domain	DIS3-like exonuclease 2 {ECO:0000255|HAMAP-Rule:MF_03045} GN=SOV OS=Arabidopsis thaliana (Mouse-ear cress) PE=1 SV=1	J	Translation, ribosomal structure and biogenesis	PREDICTED: DIS3-like exonuclease 2 [Vitis vinifera]	molecular function: binding (GO:0005488);; biological process: metabolic process (GO:0008152);; biological process: cellular process (GO:0009987);; molecular function: catalytic activity (GO:0003824)	--	3	p1	(T)10	10	2569	2578	GATTGTTGTAACTGCCGGGT	59.859	20	TTGCAAACCAAAATCCACAA	59.946	20	225	2436	2660	TTCGATTGTTGTAACTGCCG	59.729	20
c66858.graph_c0	57.23	54.14	51.97	57.52	60.74	54.97	64.36	56.37	53.79	56.7878	3.59595	0.0633226	0.0902091	0.0902091	0.169722	0.169722	0.0894668	0.0894668	[S]	Function unknown	Molecular Function: methyltransferase activity (GO:0008168);; Biological Process: methylation (GO:0032259);;	K14568|6.99658e-65|vvi:100260745|ribosomal RNA small subunit methyltransferase nep-1; K14568 rRNA small subunit pseudouridine methyltransferase Nep1 [EC:2.1.1.260] (A)	[J]	Translation, ribosomal structure and biogenesis	EMG1/NEP1 methyltransferase;; EMG1/NEP1 methyltransferase	--	J	Translation, ribosomal structure and biogenesis	PREDICTED: ribosomal RNA small subunit methyltransferase nep-1 [Vitis vinifera]	biological process: metabolic process (GO:0008152);; molecular function: catalytic activity (GO:0003824)	Ribosome biogenesis in eukaryotes (ko03008)	--	--	--	--	--	--	--	--	--	--	--	--	--	--	--	--	--	--
c69644.graph_c0	48.35	55.19	53.7	51.11	51.73	58.89	62.23	42.6	53.29	53.01	5.37713	0.101436	0.120139	0.120139	0.169281	0.169281	0.0589841	0.0589841	--	--	--	--	[R]	General function prediction only	Leucine rich repeat;; F-box-like;; F-box domain	F-box/LRR-repeat protein 15 GN=FBL15 OS=Arabidopsis thaliana (Mouse-ear cress) PE=2 SV=2	R	General function prediction only	conserved hypothetical protein [Ricinus communis]	--	--	--	--	--	--	--	--	--	--	--	--	--	--	--	--	--	--	--	--
c72838.graph_c1	68.29	75.62	72.16	51.75	72.04	60.81	60.79	56.85	61.13	64.3822	7.55162	0.117294	-0.187075	0.187075	-0.169271	0.169271	0.0263372	0.0263372	--	--	--	K11827|3.01679e-06|eus:EUTSA_v10022930mg|hypothetical protein; K11827 AP-2 complex subunit sigma-1 (A)	[U]	Intracellular trafficking, secretion, and vesicular transport	Clathrin adaptor complex small chain	AP-2 complex subunit sigma GN=AP17 OS=Arabidopsis thaliana (Mouse-ear cress) PE=2 SV=1	--	--	PREDICTED: uncharacterized protein LOC100500378 isoform X1 [Glycine max]	--	Endocytosis (ko04144)	1	p1	(T)10	10	747	756	ATGTACGCAATGCCCATCTT	60.361	20	CCCTCTTGCTTGTTTCTTGC	59.993	20	276	547	822	ATGTACGCAATGCCCATCTT	60.361	20
c69208.graph_c2	65.85	46.54	48.25	39.1	37.68	40.05	38.25	43.59	41.75	44.5622	8.27942	0.185795	0.0205604	0.0205604	0.169242	0.169242	0.159124	0.159124	--	--	--	K14841|1.67971e-99|cmo:103484256|WD repeat-containing protein 74; K14841 ribosome biogenesis protein NSA1 (A)	[S]	Function unknown	DNA polymerase delta, subunit 4	--	R	General function prediction only	PREDICTED: WD repeat-containing protein 74 isoform X1 [Cucumis melo]	--	--	2	p2	(TC)9	18	4217	4234	--	--	--	--	--	--	--	--	--	--	--	--
c66824.graph_c0	95.85	95.64	112.75	102.76	98.58	109.14	104.31	102.91	105.11	103.006	5.41422	0.0525624	0.0780883	0.0780883	0.16902	0.16902	0.101049	0.101049	--	--	--	K14753|2.59992e-11|csv:101216713|guanine nucleotide-binding protein subunit beta-like protein-like; K14753 guanine nucleotide-binding protein subunit beta-2-like 1 protein (A)	[T]	Signal transduction mechanisms	--	Guanine nucleotide-binding protein subunit beta-like protein A OS=Arabidopsis thaliana (Mouse-ear cress) PE=1 SV=2	T	Signal transduction mechanisms	unnamed protein product [Vitis vinifera]	--	--	2	p2	(TA)7	14	1680	1693	ACACCTTGACTCTAGCATAATGAA	57.185	24	TTCACTTCCGTGCCATGTTA	60.111	20	207	1653	1859	ACACCTTGACTCTAGCATAATGAA	57.185	24
c45796.graph_c0	10.94	8.76	10.35	10.07	10.67	10.11	11.21	10.54	10.18	10.3144	0.65894	0.0638852	0.0432599	0.0432599	0.168906	0.168906	0.134269	0.134269	--	--	--	--	--	--	RNA recognition motif. (a.k.a. RRM, RBD, or RNP domain);; RNA recognition motif (a.k.a. RRM, RBD, or RNP domain)	Protein MATERNALLY EXPRESSED GENE 5 GN=MEG5 OS=Zea mays (Maize) PE=2 SV=1	R	General function prediction only	PREDICTED: uncharacterized protein LOC102627431 [Citrus sinensis]	--	--	1	p1	(T)10	10	1226	1235	ACTTACGGCTGCAGTTTGCT	60.081	20	TGTGCATCTCAAGCGTTCAT	60.423	20	247	1095	1341	ACTTACGGCTGCAGTTTGCT	60.081	20
c63933.graph_c0	124.43	93.5	119.55	132.77	115.37	116.99	138.97	129.9	103.66	119.46	13.4903	0.112927	0.135959	0.135959	0.168179	0.168179	0.041677	0.041677	--	--	--	K02991|1.05988e-07|rcu:RCOM_0822540|40S ribosomal protein S6, putative; K02991 small subunit ribosomal protein S6e (A)	[J]	Translation, ribosomal structure and biogenesis	--	40S ribosomal protein S6 GN=rps6 OS=Asparagus officinalis (Garden asparagus) PE=2 SV=1	J	Translation, ribosomal structure and biogenesis	40S ribosomal protein S6, putative [Ricinus communis]	--	Ribosome (ko03010)	1	p1	(A)10	10	1294	1303	TCGCCAAAAGATTTTCCATC	60.016	20	ACCAGAAACTGTACGCACCC	60.035	20	153	1209	1361	TTGCTTCTCGCCAAAAGATT	59.96	20
c72528.graph_c1	43.53	36.19	42.25	48.04	43.92	41.18	48.46	44.26	38.79	42.9578	3.73998	0.0870618	0.0158964	0.0158964	0.168045	0.168045	0.162405	0.162405	--	--	Molecular Function: DNA binding (GO:0003677);; Molecular Function: DNA-directed RNA polymerase activity (GO:0003899);; Cellular Component: mitochondrion (GO:0005739);; Biological Process: transcription, DNA-templated (GO:0006351);;	K10908|0|pper:PRUPE_ppa000868mg|hypothetical protein; K10908 DNA-directed RNA polymerase, mitochondrial [EC:2.7.7.6] (A)	[KL]	--	DNA-directed RNA polymerase N-terminal;; DNA-dependent RNA polymerase;; DNA-directed RNA polymerase N-terminal;; Ribosomal protein S2;; UTP--glucose-1-phosphate uridylyltransferase	DNA-directed RNA polymerase 3, chloroplastic (Precursor) GN=F27D4.3 OS=Arabidopsis thaliana (Mouse-ear cress) PE=2 SV=1	K	Transcription	DNA/RNA polymerases superfamily protein isoform 2 [Theobroma cacao]	molecular function: binding (GO:0005488);; biological process: metabolic process (GO:0008152);; biological process: cellular process (GO:0009987);; molecular function: catalytic activity (GO:0003824);; cellular component: cell (GO:0005623);; cellular component: organelle (GO:0043226);; cellular component: cell part (GO:0044464)	--	1	p1	(T)14	14	5418	5431	--	--	--	--	--	--	--	--	--	--	--	--
c66681.graph_c0	64.37	60.1	68.73	61.41	57.24	61.99	58.69	60.09	61.06	61.52	3.17875	0.0516701	-0.0930302	0.0930302	-0.16758	0.16758	-0.0639704	0.0639704	[R]	General function prediction only	--	--	[S]	Function unknown	Protein of unknown function (DUF563);; RNA recognition motif. (a.k.a. RRM, RBD, or RNP domain);; RNA recognition motif (a.k.a. RRM, RBD, or RNP domain);; RNA recognition motif. (a.k.a. RRM, RBD, or RNP domain)	--	S	Function unknown	PREDICTED: uncharacterized protein LOC103939951 [Pyrus x bretschneideri]	--	--	5	p1	(A)14	14	2393	2406	TGGTACGGTGTTCCTGACAA	60.001	20	TGGGGAGCTGATAATGGTTC	59.894	20	262	2187	2448	TTGGTACGGTGTTCCTGACA	60.001	20
c70396.graph_c1	485.42	565.39	560.72	585.38	559.91	542.91	635.84	544.44	492.54	552.506	42.9045	0.0776544	0.107158	0.107158	0.166836	0.166836	0.069734	0.069734	--	--	Molecular Function: aspartic-type endopeptidase activity (GO:0004190);; Biological Process: proteolysis (GO:0006508);; Biological Process: lipid metabolic process (GO:0006629);;	K08245|0|pper:PRUPE_ppa004375mg|hypothetical protein; K08245 phytepsin [EC:3.4.23.40] (A)	[O]	Posttranslational modification, protein turnover, chaperones	Eukaryotic aspartyl protease;; Saposin-like type B, region 1;; Saposin-like type B, region 2;; B-cell receptor-associated protein 31-like	Aspartic proteinase (Precursor) OS=Cucurbita pepo (Vegetable marrow) PE=2 SV=1	O	Posttranslational modification, protein turnover, chaperones	PREDICTED: aspartic proteinase A1-like [Populus euphratica]	biological process: metabolic process (GO:0008152);; molecular function: catalytic activity (GO:0003824);; biological process: single-organism process (GO:0044699)	--	--	--	--	--	--	--	--	--	--	--	--	--	--	--	--	--	--	--
c68822.graph_c0	38.82	35.62	39.11	35.63	32.83	35.31	29.68	30.83	29.54	34.1522	3.43358	0.100537	-0.0610185	0.0610185	-0.166829	0.166829	-0.0954812	0.0954812	[R]	General function prediction only	--	K14548|1.01349e-157|mdm:103421110|cirhin-like; K14548 U3 small nucleolar RNA-associated protein 4 (A)	[R]	General function prediction only	WD domain, G-beta repeat	--	R	General function prediction only	PREDICTED: LOW QUALITY PROTEIN: cirhin-like [Malus domestica]	--	Ribosome biogenesis in eukaryotes (ko03008)	--	--	--	--	--	--	--	--	--	--	--	--	--	--	--	--	--	--
c67621.graph_c1	26.79	27.76	32.4	30.32	28.49	26.48	30.9	34.51	25.75	29.2667	2.79339	0.0954461	-0.0126788	0.0126788	0.166318	0.166318	0.18909	0.18909	--	--	Cellular Component: mitochondrion (GO:0005739);; Cellular Component: endoplasmic reticulum (GO:0005783);; Cellular Component: plasmodesma (GO:0009506);; Cellular Component: integral component of membrane (GO:0016021);;	--	--	--	--	--	S	Function unknown	Bifunctional dihydroflavonol 4-reductase/flavanone 4-reductase isoform 1 [Theobroma cacao]	cellular component: cell (GO:0005623);; cellular component: organelle (GO:0043226);; cellular component: cell part (GO:0044464);; cellular component: cell junction (GO:0030054);; cellular component: symplast (GO:0055044);; cellular component: membrane (GO:0016020);; cellular component: membrane part (GO:0044425)	--	1	p1	(T)11	11	2867	2877	AGCGTGTCTGTATCCCCAAT	59.434	20	TAAAATTGGAACACCGGAGG	59.795	20	199	2743	2941	AAACGTGTCTAACACGAGCG	59	20
c65337.graph_c0	9.95	7.99	8.07	6.42	7.75	8.21	6.25	7.37	6.89	7.65556	1.05589	0.137925	-0.0508663	0.0508663	-0.166258	0.166258	-0.106075	0.106075	[L]	Replication, recombination and repair	Biological Process: tRNA splicing, via endonucleolytic cleavage and ligation (GO:0006388);; Molecular Function: transferase activity, transferring phosphorus-containing groups (GO:0016772);;	--	--	--	Retrotransposon gag protein	--	S	Function unknown	PREDICTED: uncharacterized protein LOC100259142 [Vitis vinifera]	biological process: metabolic process (GO:0008152);; biological process: cellular process (GO:0009987);; molecular function: catalytic activity (GO:0003824)	--	1	p1	(A)12	12	1150	1161	TCTCCCTGAGGGTTTGTGTC	60.088	20	TTAGACACTGCCATGACCGA	60.263	20	116	1080	1195	TCCCTGAGGGTTTGTGTCTC	60.088	20
c63658.graph_c0	449.38	357.36	389.85	379.25	425.58	431.46	467.56	374.56	394.04	407.671	35.2005	0.0863453	0.0940059	0.0940059	0.165733	0.165733	0.0801212	0.0801212	[Z]	Cytoskeleton	Molecular Function: ATP binding (GO:0005524);; Cellular Component: cell wall (GO:0005618);; Cellular Component: nucleolus (GO:0005730);; Cellular Component: mitochondrion (GO:0005739);; Cellular Component: cytoskeleton (GO:0005856);; Cellular Component: plasma membrane (GO:0005886);; Biological Process: response to light stimulus (GO:0009416);; Biological Process: response to wounding (GO:0009611…	K10355|0|tcc:TCM_001364|Actin 7 isoform 1; K10355 actin, other eukaryote (A)	[Z]	Cytoskeleton	Actin	Actin-7 GN=ACT7 OS=Arabidopsis thaliana (Mouse-ear cress) PE=1 SV=1	Z	Cytoskeleton	Actin 7 isoform 1 [Theobroma cacao]	molecular function: binding (GO:0005488);; cellular component: cell (GO:0005623);; cellular component: cell part (GO:0044464);; cellular component: membrane-enclosed lumen (GO:0031974);; cellular component: organelle (GO:0043226);; cellular component: organelle part (GO:0044422);; cellular component: membrane (GO:0016020);; biological process: response to stimulus (GO:0050896);; biological proces…	--	1	c	(T)14catgaatggattaggagttttgtgtcaaggatggagaatc(T)11	65	1491	1555	GGTATTTGGGTTGCTTGGAA	59.801	20	CATCAAACAAAGACGAGCCA	59.84	20	211	1373	1583	TCTTCATCACCCGGTTTCAT	60.317	20
c71129.graph_c0	97.05	81.4	81.34	85.21	78.05	80.55	98.63	78.44	75.13	83.9778	7.86363	0.0936394	-0.191341	0.191341	-0.165649	0.165649	0.0346856	0.0346856	[O]	Posttranslational modification, protein turnover, chaperones	Molecular Function: threonine-type endopeptidase activity (GO:0004298);; Cellular Component: nucleus (GO:0005634);; Cellular Component: cytoplasm (GO:0005737);; Cellular Component: proteasome core complex (GO:0005839);; Biological Process: proteolysis involved in cellular protein catabolic process (GO:0051603);;	K02735|3.52794e-78|tcc:TCM_035163|Proteasome beta subunit C1; K02735 20S proteasome subunit beta 3 [EC:3.4.25.1] (A)	[O]	Posttranslational modification, protein turnover, chaperones	Ring finger domain;; RING-H2 zinc finger;; Proteasome subunit	Proteasome subunit beta type-3-A GN=F8K7.15 OS=Arabidopsis thaliana (Mouse-ear cress) PE=1 SV=2	O	Posttranslational modification, protein turnover, chaperones	hypothetical protein EUGRSUZ_F04339 [Eucalyptus grandis]	biological process: metabolic process (GO:0008152);; molecular function: catalytic activity (GO:0003824);; cellular component: cell (GO:0005623);; cellular component: organelle (GO:0043226);; cellular component: cell part (GO:0044464);; cellular component: macromolecular complex (GO:0032991);; biological process: cellular process (GO:0009987)	Proteasome (ko03050)	2	p1	(T)13	13	3385	3397	GATCAGCACAAAAGTGGGGT	59.973	20	TTTCAATCCTTGAATGCGAA	59.232	20	262	3186	3447	GATCAGCACAAAAGTGGGGT	59.973	20
c71886.graph_c1	85.1	109.59	101.24	74.91	99.34	91.48	78.79	79.18	82.92	89.1722	11.2445	0.126099	-0.10858	0.10858	-0.16516	0.16516	-0.0471248	0.0471248	--	--	--	--	--	--	Agenet domain	--	S	Function unknown	PREDICTED: uncharacterized protein LOC100266068 isoform X2 [Vitis vinifera]	--	--	1	p1	(T)12	12	25	36	CAAAAATTCGATCACAGTCGC	60.632	21	TACCGGCAGATCGAGTTAGG	60.227	20	104	0	103	CAAAAATTCGATCACAGTCGC	60.632	21
c61784.graph_c0	18.55	26.68	20.57	24.31	25.08	22.45	31.12	22.35	21.79	23.6556	3.48884	0.147485	-0.0211181	0.0211181	0.165011	0.165011	0.196762	0.196762	--	--	--	--	--	--	--	--	R	General function prediction only	PREDICTED: uncharacterized protein LOC104592441 isoform X1 [Nelumbo nucifera]	--	--	2	p2	(CT)6	12	1179	1190	TTTTGGGTGAAAATTCCCAT	59.111	20	CCGCCCCAATGTTAGAAATA	59.789	20	220	1122	1341	TTTGGGTGAAAATTCCCATT	59.111	20
c64028.graph_c0	225.18	173.32	156.18	212.6	214.56	178.06	241.93	182.55	150.95	192.814	30.0407	0.155801	0.175377	0.175377	0.164903	0.164903	-0.00214598	0.00214598	--	--	--	--	--	--	NmrA-like family;; NADH(P)-binding;; NAD dependent epimerase/dehydratase family	Isoflavone reductase-like protein OS=Olea europaea (Common olive) PE=1 SV=1	R	General function prediction only	NmrA-like negative transcriptional regulator family protein [Theobroma cacao]	--	--	--	--	--	--	--	--	--	--	--	--	--	--	--	--	--	--	--	--
c64783.graph_c2	14.99	16.91	14.92	14.39	16.78	18.01	19.16	13.68	16.71	16.1722	1.6951	0.104816	0.0962604	0.0962604	0.16453	0.16453	0.0780977	0.0780977	--	--	--	--	--	--	--	WPP domain-associated protein (Fragment) GN=WAP OS=Solanum lycopersicum (Tomato) PE=1 SV=1	S	Function unknown	PREDICTED: WPP domain-associated protein [Vitis vinifera]	--	--	1	p2	(AG)11	22	27	48	--	--	--	--	--	--	--	--	--	--	--	--
c62977.graph_c0	163.32	165.03	180.17	149.5	180.01	172.05	132.29	143.05	147.36	159.198	16.0143	0.100594	0.0237765	0.0237765	-0.164513	0.164513	-0.178994	0.178994	--	--	Molecular Function: structural constituent of ribosome (GO:0003735);; Cellular Component: ribosome (GO:0005840);; Biological Process: translation (GO:0006412);;	K02993|4.56485e-57|gmx:100500684|uncharacterized LOC100500684; K02993 small subunit ribosomal protein S7e (A)	[J]	Translation, ribosomal structure and biogenesis	Ribosomal protein S7e	40S ribosomal protein S7 GN=RPS7 OS=Avicennia marina (Grey mangrove) PE=2 SV=1	J	Translation, ribosomal structure and biogenesis	uncharacterized protein LOC100500684 [Glycine max]	molecular function: structural molecule activity (GO:0005198);; cellular component: cell (GO:0005623);; cellular component: macromolecular complex (GO:0032991);; cellular component: organelle (GO:0043226);; cellular component: cell part (GO:0044464);; biological process: metabolic process (GO:0008152);; biological process: cellular process (GO:0009987)	Ribosome (ko03010)	--	--	--	--	--	--	--	--	--	--	--	--	--	--	--	--	--	--
c72387.graph_c1	6.82	8.08	7.97	7.25	6.1	7.09	6.7	5.17	6.33	6.83444	0.860324	0.125881	-0.0392948	0.0392948	-0.16421	0.16421	-0.114363	0.114363	--	--	Molecular Function: zinc ion binding (GO:0008270);;	--	[O]	Posttranslational modification, protein turnover, chaperones	--	E3 ubiquitin ligase BIG BROTHER-related GN=BBR OS=Arabidopsis thaliana (Mouse-ear cress) PE=2 SV=1	O	Posttranslational modification, protein turnover, chaperones	hypothetical protein CICLE_v10032094mg [Citrus clementina]	molecular function: binding (GO:0005488)	--	1	p2	(TA)8	16	1759	1774	CCAAGTGTATGTTTCGCTCCT	59.252	21	TGGGATGAAGCATTTTCTTT	57.277	20	237	1730	1966	TTGTTCCAAGTGTATGTTTCGC	60.039	22
c56528.graph_c0	11.52	10.98	7.49	9.51	7.3	9.99	7.95	7.99	9.05	9.08667	1.44294	0.158797	-0.12437	0.12437	-0.164069	0.164069	-0.0271879	0.0271879	--	--	Biological Process: syncytium formation (GO:0006949);; Biological Process: inflammatory response (GO:0006954);; Biological Process: response to other organism (GO:0051707);;	--	[V]	Defense mechanisms	Macrophage migration inhibitory factor (MIF)	--	V	Defense mechanisms	unnamed protein product [Coffea canephora]	biological process: cellular process (GO:0009987);; biological process: developmental process (GO:0032502);; biological process: single-organism process (GO:0044699);; biological process: response to stimulus (GO:0050896);; biological process: multi-organism process (GO:0051704)	--	--	--	--	--	--	--	--	--	--	--	--	--	--	--	--	--	--	--
c43944.graph_c0	13.38	13.48	18.91	17.96	10.03	16.73	18.4	14.56	15.66	15.4567	2.72826	0.17651	0.0131559	0.0131559	0.163793	0.163793	0.162811	0.162811	--	--	Biological Process: establishment of planar polarity (GO:0001736);; Biological Process: response to molecule of bacterial origin (GO:0002237);; Molecular Function: transporter activity (GO:0005215);; Biological Process: lipid transport (GO:0006869);; Biological Process: intra-Golgi vesicle-mediated transport (GO:0006891);; Biological Process: response to oxidative stress (GO:0006979);; Biological…	K14513|1.81334e-26|mdm:103433224|EIN2; ethylene-insensitive protein 2-like; K14513 ethylene-insensitive protein 2 (A)	[P]	Inorganic ion transport and metabolism	--	Ethylene-insensitive protein 2 GN=F12E4.10 OS=Arabidopsis thaliana (Mouse-ear cress) PE=1 SV=1	P	Inorganic ion transport and metabolism	ethylene signalling protein [Malus domestica]	biological process: developmental process (GO:0032502);; biological process: single-organism process (GO:0044699);; biological process: response to stimulus (GO:0050896);; biological process: multi-organism process (GO:0051704);; biological process: localization (GO:0051179);; molecular function: transporter activity (GO:0005215);; biological process: cellular process (GO:0009987);; biological pr…	Plant hormone signal transduction (ko04075)	--	--	--	--	--	--	--	--	--	--	--	--	--	--	--	--	--	--
c72147.graph_c0	100.99	118.61	100.23	78.28	102.51	91.34	87.29	80.86	86.49	94.0667	11.9907	0.12747	-0.165032	0.165032	-0.163791	0.163791	0.0106502	0.0106502	[R]	General function prediction only	Molecular Function: structural molecule activity (GO:0005198);; Biological Process: intracellular protein transport (GO:0006886);; Biological Process: vesicle-mediated transport (GO:0016192);; Molecular Function: myosin heavy chain kinase activity (GO:0016905);; Cellular Component: membrane coat (GO:0030117);;	K17302|0|tcc:TCM_028674|Coatomer, beta' subunit isoform 1; K17302 coatomer, subunit beta' (A)	[U]	Intracellular trafficking, secretion, and vesicular transport	Coatomer WD associated region;; WD domain, G-beta repeat	Coatomer subunit beta&apos;-2 GN=At1g52360 OS=Arabidopsis thaliana (Mouse-ear cress) PE=2 SV=1	U	Intracellular trafficking, secretion, and vesicular transport	Coatomer, beta&apos; subunit isoform 1 [Theobroma cacao]	molecular function: structural molecule activity (GO:0005198);; biological process: localization (GO:0051179);; biological process: metabolic process (GO:0008152);; biological process: cellular process (GO:0009987);; molecular function: catalytic activity (GO:0003824);; cellular component: cell (GO:0005623);; cellular component: membrane (GO:0016020);; cellular component: macromolecular complex (…	--	2	p1	(A)14	14	4417	4430	--	--	--	--	--	--	--	--	--	--	--	--
c69769.graph_c0	11.4	10	9.91	10.89	9.51	9.82	8.75	9.01	8.56	9.76111	0.890399	0.091219	-0.0600987	0.0600987	-0.163695	0.163695	-0.0931539	0.0931539	--	--	--	--	--	--	--	--	S	Function unknown	PREDICTED: uncharacterized protein LOC105127599 isoform X2 [Populus euphratica]	--	--	--	--	--	--	--	--	--	--	--	--	--	--	--	--	--	--	--	--
c67093.graph_c1	42.26	47.65	45.1	37.57	41.82	38.04	36.31	36.56	38.37	40.4089	3.79035	0.0937999	-0.12813	0.12813	-0.163643	0.163643	-0.0259955	0.0259955	--	--	--	--	--	--	PLATZ transcription factor	--	S	Function unknown	unnamed protein product [Vitis vinifera]	--	--	5	p1	(A)15	15	4453	4467	TCATCCACATCATCCTCTGC	59.591	20	CAGTAAGGCCGAGTGAAAGC	60.015	20	105	4403	4507	TCATCCACATCATCCTCTGC	59.591	20
c63620.graph_c0	28.66	27.9	25.16	26.18	33.19	31.8	22.74	31.85	31.69	28.7967	3.3927	0.117816	0.190559	0.190559	0.163577	0.163577	-0.0170606	0.0170606	[U]	Intracellular trafficking, secretion, and vesicular transport	Biological Process: postreplication repair (GO:0006301);; Biological Process: intracellular protein transport (GO:0006886);; Molecular Function: protein transporter activity (GO:0008565);; Cellular Component: clathrin vesicle coat (GO:0030125);;	K12403|3.95272e-36|mdm:103406794|AP-4 complex subunit sigma; K12403 AP-4 complex subunit sigma-1 (A)	[U]	Intracellular trafficking, secretion, and vesicular transport	Clathrin adaptor complex small chain	AP-4 complex subunit sigma GN=At2g19790 OS=Arabidopsis thaliana (Mouse-ear cress) PE=2 SV=1	U	Intracellular trafficking, secretion, and vesicular transport	PREDICTED: AP-4 complex subunit sigma isoform X1 [Elaeis guineensis]	biological process: metabolic process (GO:0008152);; biological process: cellular process (GO:0009987);; biological process: single-organism process (GO:0044699);; biological process: response to stimulus (GO:0050896);; biological process: localization (GO:0051179);; molecular function: transporter activity (GO:0005215);; cellular component: cell (GO:0005623);; cellular component: membrane (GO:00…	--	1	p1	(T)13	13	1288	1300	AGGAAATGGTCATGAATGGG	59.605	20	TCGGAACAACACAAATTCAAA	59.048	21	193	1146	1338	GGAAATGGTCATGAATGGGT	59.464	20
c59906.graph_c0	14.35	12.1	14.79	15.27	12.42	15.01	17.05	12.62	13.15	14.0844	1.54025	0.109358	0.0861933	0.0861933	0.163539	0.163539	0.0871487	0.0871487	[L]	Replication, recombination and repair	Molecular Function: nucleic acid binding (GO:0003676);; Biological Process: DNA-dependent DNA replication (GO:0006261);;	K10739|1.01533e-112|cmo:103494262|replication protein A 32 kDa subunit B-like; K10739 replication factor A2 (A)	[L]	Replication, recombination and repair	Replication protein A C terminal;; OB-fold nucleic acid binding domain	Replication protein A 32 kDa subunit B GN=F13E7.13 OS=Arabidopsis thaliana (Mouse-ear cress) PE=2 SV=1	L	Replication, recombination and repair	PREDICTED: replication protein A 32 kDa subunit A isoform X1 [Vitis vinifera]	molecular function: binding (GO:0005488);; biological process: metabolic process (GO:0008152);; biological process: cellular process (GO:0009987)	DNA replication (ko03030);; Nucleotide excision repair (ko03420);; Mismatch repair (ko03430);; Homologous recombination (ko03440)	--	--	--	--	--	--	--	--	--	--	--	--	--	--	--	--	--	--
c68399.graph_c0	11.65	11.02	12.45	10.52	13.59	10.31	11.54	11.33	12.55	11.6622	0.98861	0.0847703	0.0854856	0.0854856	0.163429	0.163429	0.0859874	0.0859874	[E]	Amino acid transport and metabolism	Molecular Function: catalytic activity (GO:0003824);; Biological Process: metabolic process (GO:0008152);; Molecular Function: pyridoxal phosphate binding (GO:0030170);;	--	[H]	Coenzyme transport and metabolism	--	Molybdenum cofactor sulfurase {ECO:0000255|HAMAP-Rule:MF_03050} GN=FLACCA OS=Solanum lycopersicum (Tomato) PE=2 SV=1	H	Coenzyme transport and metabolism	PREDICTED: uncharacterized protein LOC100259174 [Vitis vinifera]	biological process: metabolic process (GO:0008152);; molecular function: catalytic activity (GO:0003824);; molecular function: binding (GO:0005488)	--	2	p1	(T)17	17	3911	3927	TCCCAGAGGGTTCAGAAATG	60.042	20	GAAGCGGCACAAAACTTACC	59.752	20	168	3865	4032	TCCCAGAGGGTTCAGAAATG	60.042	20
c69993.graph_c2	18.19	13.52	18.47	17.67	16.47	18.64	20.91	15.99	15.89	17.3056	1.99463	0.115259	0.127779	0.127779	0.16342	0.16342	0.0436442	0.0436442	--	--	--	--	--	--	--	--	S	Function unknown	hypothetical protein L484_022698 [Morus notabilis]	--	--	1	p1	(A)16	16	9	24	--	--	--	--	--	--	--	--	--	--	--	--
c70767.graph_c1	38.14	39.43	32.38	32.12	33.02	33.56	26.86	26.73	26.33	32.0633	4.50731	0.140575	0.0405052	0.0405052	-0.163282	0.163282	-0.193215	0.193215	--	--	Biological Process: cellular process (GO:0009987);;	--	--	--	DDT domain	--	S	Function unknown	PREDICTED: uncharacterized protein LOC103935422 [Pyrus x bretschneideri]	biological process: cellular process (GO:0009987)	--	1	p2	(TA)7	14	1	14	--	--	--	--	--	--	--	--	--	--	--	--
c70793.graph_c1	18.34	14.12	15.65	14.44	15.69	15.37	15.84	16.13	15.54	15.68	1.12505	0.0717505	0.00148789	0.00148789	0.162797	0.162797	0.170409	0.170409	--	--	--	--	--	--	Tetratricopeptide repeat;; Protein of unknown function (DUF688);; TPR repeat	Ethylene-overproduction protein 1 GN=ETO1 OS=Arabidopsis thaliana (Mouse-ear cress) PE=1 SV=2	R	General function prediction only	Tetratricopeptide repeat (TPR)-containing protein isoform 1 [Theobroma cacao]	--	--	2	p1	(A)14	14	4780	4793	TGTATGTCTACAACCGCCCA	59.988	20	TTTTATACCCATTCGCCTGC	59.928	20	204	4734	4937	TGTATGTCTACAACCGCCCA	59.988	20
c61094.graph_c0	116	108.24	97.21	109.84	108.15	76.76	92.98	109.85	71.42	98.9389	14.8624	0.150218	-0.101141	0.101141	-0.162775	0.162775	-0.0518983	0.0518983	--	--	--	K13199|1.11111e-07|vvi:100259885|plasminogen activator inhibitor 1 RNA-binding protein; K13199 plasminogen activator inhibitor 1 RNA-binding protein (A)	--	--	--	--	R	General function prediction only	PREDICTED: plasminogen activator inhibitor 1 RNA-binding protein-like isoform X1 [Sesamum indicum]	--	--	1	p1	(T)12	12	1222	1233	CTTGGGTGCCAAGTGAGATT	60.111	20	CCCCCAAATTCTCAGAACAG	59.521	20	251	1030	1280	TGCCCCCACTTACATTCTCT	59.55	20
c64989.graph_c1	5.85	5.28	6.94	5.67	5.04	7.97	5.07	6.24	7.37	6.15889	0.994881	0.161536	0.0908102	0.0908102	0.16272	0.16272	0.0832917	0.0832917	--	--	--	--	[R]	General function prediction only	PPR repeat family;; PPR repeat;; Pentatricopeptide repeat domain;; PPR repeat	Pentatricopeptide repeat-containing protein At1g71460, chloroplastic (Precursor) GN=PCMP-A3 OS=Arabidopsis thaliana (Mouse-ear cress) PE=2 SV=1	R	General function prediction only	Pentatricopeptide repeat (PPR-like) superfamily protein [Theobroma cacao]	--	--	1	p3	(CAA)5	15	117	131	AATCTCACGTAGGCAGCCAT	59.723	20	CGGTGAACTGGGAAGTGTTT	60.005	20	226	12	237	AATCTCACGTAGGCAGCCAT	59.723	20
c67786.graph_c0	15.57	18.74	14.94	20.95	15.89	20.29	21.84	15.13	16.93	17.8089	2.53889	0.142563	0.194759	0.194759	0.162322	0.162322	-0.0200375	0.0200375	[Z]	Cytoskeleton	Molecular Function: ATP binding (GO:0005524);; Cellular Component: kinesin complex (GO:0005871);; Cellular Component: microtubule (GO:0005874);; Biological Process: microtubule-based movement (GO:0007018);; Molecular Function: microtubule binding (GO:0008017);; Molecular Function: minus-end-directed microtubule motor activity (GO:0008569);;	K10406|0|tcc:TCM_034539|Di-glucose binding protein with Kinesin motor domain; K10406 kinesin family member C2/C3 (A)	[Z]	Cytoskeleton	Kinesin motor domain;; Di-glucose binding within endoplasmic reticulum;; Carbohydrate-binding protein of the ER	Kinesin-4 GN=F2P16.12 OS=Arabidopsis thaliana (Mouse-ear cress) PE=1 SV=2	Z	Cytoskeleton	Di-glucose binding protein with Kinesin motor domain [Theobroma cacao]	molecular function: binding (GO:0005488);; cellular component: cell (GO:0005623);; cellular component: macromolecular complex (GO:0032991);; cellular component: organelle (GO:0043226);; cellular component: organelle part (GO:0044422);; cellular component: cell part (GO:0044464);; biological process: cellular process (GO:0009987);; biological process: single-organism process (GO:0044699);; biologi…	--	--	--	--	--	--	--	--	--	--	--	--	--	--	--	--	--	--	--
c68499.graph_c0	57.32	48.25	44.14	50.71	52.81	41.97	55.85	47.78	39.43	48.6956	5.76799	0.11845	-0.135347	0.135347	-0.162253	0.162253	-0.0182446	0.0182446	--	--	Molecular Function: RNA binding (GO:0003723);;	K14945|7.09549e-54|cic:CICLE_v10009077mg|hypothetical protein; K14945 protein quaking (A)	[A]	RNA processing and modification	--	KH domain-containing protein At4g26480 GN=At4g26480 OS=Arabidopsis thaliana (Mouse-ear cress) PE=2 SV=1	A	RNA processing and modification	KH domain-containing protein [Glycine soja]	molecular function: binding (GO:0005488)	--	1	p1	(A)17	17	9	25	--	--	--	--	--	--	--	--	--	--	--	--
c51503.graph_c0	16.15	18.37	22.37	16.22	17.81	16.87	16.73	16.92	13.47	17.2122	2.2324	0.129699	-0.122407	0.122407	-0.161689	0.161689	-0.0300195	0.0300195	--	--	--	--	--	--	--	--	O	Posttranslational modification, protein turnover, chaperones	PREDICTED: uncharacterized protein LOC101302161 [Fragaria vesca subsp. vesca]	--	--	--	--	--	--	--	--	--	--	--	--	--	--	--	--	--	--	--	--
c67428.graph_c0	16.12	20.01	25.67	16.58	16.39	15.99	16.52	14.27	14.41	17.3289	3.33316	0.192347	-0.13997	0.13997	-0.161672	0.161672	-0.0124824	0.0124824	[GOU]	--	--	K15356|9.80963e-136|rcu:RCOM_0182690|GDP-mannose transporter, putative; K15356 GDP-mannose transporter (A)	[GOU]	--	--	GDP-mannose transporter GONST1 GN=GONST1 OS=Arabidopsis thaliana (Mouse-ear cress) PE=1 SV=2	P	Inorganic ion transport and metabolism	hypothetical protein JCGZ_00810 [Jatropha curcas]	--	--	1	p3	(TAC)6	18	3289	3306	ATCGCTCACCAATAATCCCA	60.296	20	CCATAACCAAGCCTTTCAACA	59.982	21	258	3104	3361	TGGAGAGCAGTCACCAGAGA	59.685	20
c69550.graph_c0	55.4	49.37	43.2	45.53	54.91	46.81	44.51	39.65	38.33	46.4122	5.65355	0.121812	0.0249747	0.0249747	-0.161631	0.161631	-0.178032	0.178032	--	--	Biological Process: microtubule cytoskeleton organization (GO:0000226);; Biological Process: cytokinesis (GO:0000910);; Molecular Function: microtubule binding (GO:0008017);;	K16732|0|rcu:RCOM_0778090|PLE, putative; K16732 protein regulator of cytokinesis 1 (A)	[DZ]	--	Microtubule associated protein (MAP65/ASE1 family)	65-kDa microtubule-associated protein 6 GN=MAP65-6 OS=Arabidopsis thaliana (Mouse-ear cress) PE=1 SV=1	Z	Cytoskeleton	PLE, putative [Ricinus communis]	biological process: cellular process (GO:0009987);; biological process: single-organism process (GO:0044699);; biological process: cellular component organization or biogenesis (GO:0071840);; molecular function: binding (GO:0005488)	--	2	p1	(T)11	11	3280	3290	TTGTTAGGGGTTCGGCTAAA	59.581	20	CTCCACTGTCACTCACTCGC	59.603	20	135	3192	3326	TTGTTAGGGGTTCGGCTAAA	59.581	20
c57021.graph_c0	109.29	106.54	135.33	102.02	104.98	115.13	102.46	94.52	95.64	107.323	11.583	0.107926	-0.0831758	0.0831758	-0.161549	0.161549	-0.0689436	0.0689436	[J]	Translation, ribosomal structure and biogenesis	Molecular Function: structural constituent of ribosome (GO:0003735);; Cellular Component: ribosome (GO:0005840);; Biological Process: translation (GO:0006412);;	K02934|1.03908e-114|rcu:RCOM_1526800|60S ribosomal protein L6, putative; K02934 large subunit ribosomal protein L6e (A)	[J]	Translation, ribosomal structure and biogenesis	Ribosomal protein L6e;; Ribosomal protein L6, N-terminal domain	60S ribosomal protein L6 GN=RPL6 OS=Mesembryanthemum crystallinum (Common ice plant) PE=2 SV=1	J	Translation, ribosomal structure and biogenesis	60S ribosomal protein L6, putative [Ricinus communis]	molecular function: structural molecule activity (GO:0005198);; cellular component: cell (GO:0005623);; cellular component: macromolecular complex (GO:0032991);; cellular component: organelle (GO:0043226);; cellular component: cell part (GO:0044464);; biological process: metabolic process (GO:0008152);; biological process: cellular process (GO:0009987)	Ribosome (ko03010)	--	--	--	--	--	--	--	--	--	--	--	--	--	--	--	--	--	--
c70876.graph_c0	55.15	57.69	64.16	68.88	53.76	57.77	51.09	46.78	47.15	55.8256	6.92318	0.124015	-0.0830245	0.0830245	-0.161352	0.161352	-0.0670082	0.0670082	[I]	Lipid transport and metabolism	Molecular Function: diacylglycerol O-acyltransferase activity (GO:0004144);; Cellular Component: endoplasmic reticulum membrane (GO:0005789);; Biological Process: carbohydrate metabolic process (GO:0005975);; Biological Process: circadian rhythm (GO:0007623);; Biological Process: response to cold (GO:0009409);; Biological Process: response to salt stress (GO:0009651);; Biological Process: respons…	K11155|0|pmum:103340712|diacylglycerol O-acyltransferase 1; K11155 diacylglycerol O-acyltransferase 1 [EC:2.3.1.20 2.3.1.75 2.3.1.76] (A)	[I]	Lipid transport and metabolism	MBOAT, membrane-bound O-acyltransferase family	Diacylglycerol O-acyltransferase 1 GN=F3P11.5 OS=Arabidopsis thaliana (Mouse-ear cress) PE=1 SV=2	I	Lipid transport and metabolism	diacylglycerol acyltransferase 1 [Prunus sibirica]	biological process: metabolic process (GO:0008152);; molecular function: catalytic activity (GO:0003824);; cellular component: cell (GO:0005623);; cellular component: membrane (GO:0016020);; cellular component: organelle (GO:0043226);; cellular component: organelle part (GO:0044422);; cellular component: membrane part (GO:0044425);; cellular component: cell part (GO:0044464);; biological process:…	Glycerolipid metabolism (ko00561)	1	p3	(CCA)5	15	318	332	TTCGAGCTGTCTCCTATGGC	60.504	20	AGGTGGCGCTAGGTCTTCTT	60.403	20	133	259	391	TTCGAGCTGTCTCCTATGGC	60.504	20
c61928.graph_c0	11.61	10.65	11.73	12.87	12.27	12.1	10.82	13.35	11.25	11.85	0.847362	0.0715073	0.150672	0.150672	0.160707	0.160707	0.0206569	0.0206569	--	--	Biological Process: metabolic process (GO:0008152);; Molecular Function: hydrolase activity, acting on ester bonds (GO:0016788);;	K18328|1.26073e-150|vvi:100264324|lariat debranching enzyme; K18328 lariat debranching enzyme [EC:3.1.-.-] (A)	[A]	RNA processing and modification	Lariat debranching enzyme, C-terminal domain;; Calcineurin-like phosphoesterase	Lariat debranching enzyme GN=DBR1 OS=Arabidopsis thaliana (Mouse-ear cress) PE=2 SV=1	A	RNA processing and modification	PREDICTED: lariat debranching enzyme isoform X1 [Vitis vinifera]	biological process: metabolic process (GO:0008152);; molecular function: catalytic activity (GO:0003824)	--	2	p1	(A)10	10	1022	1031	GCCAATCATGGGAAAGAAAA	59.878	20	TTAAAGCTGAATTGGGGTGC	60.074	20	275	866	1140	GTTGCATGAGTTTGTGGACG	60.16	20
c71519.graph_c0	23.75	23.73	24.3	25.92	26.42	23.75	26.22	25.85	24.5	24.9378	1.08098	0.0433473	0.187522	0.187522	0.160704	0.160704	-0.0172311	0.0172311	--	--	--	--	--	--	Ureide permease;; Sugar transport protein;; Vitamin B6 photo-protection and homoeostasis	Ureide permease 2 GN=UPS2 OS=Arabidopsis thaliana (Mouse-ear cress) PE=2 SV=2	P	Inorganic ion transport and metabolism	Ureide permease 2 isoform 3 [Theobroma cacao]	--	--	1	p1	(T)10	10	329	338	AAAGGCAACTGGGTTTTCCT	59.976	20	GGCATGAAATTAAAAGCAGAGC	60.227	22	122	306	427	GATGACAAAGGCAACTGGGT	59.973	20
c69898.graph_c0	29.18	43.07	47.02	32.25	41.23	43.99	32.43	36.31	30.71	37.3544	6.21385	0.166348	0.00525411	0.00525411	-0.160587	0.160587	-0.155857	0.155857	--	--	--	--	--	--	--	--	R	General function prediction only	PREDICTED: uncharacterized protein LOC100258488 isoform X1 [Vitis vinifera]	--	--	1	p1	(T)10	10	2885	2894	TAAAGCTGCGTTCACCTCCT	60.015	20	GTCTGCTGACCGTTCCATCT	60.269	20	235	2706	2940	AAGCTGCGTTCACCTCCTAA	60.015	20
c69763.graph_c1	28.11	30.9	27.17	22.79	21.77	25.34	19.45	25.22	25.75	25.1667	3.26236	0.12963	0.0672436	0.0672436	0.160533	0.160533	0.103916	0.103916	[P]	Inorganic ion transport and metabolism	Cellular Component: plasma membrane (GO:0005886);; Molecular Function: nitrate transmembrane transporter activity (GO:0015112);; Biological Process: nitrate transport (GO:0015706);; Cellular Component: integral component of membrane (GO:0016021);; Biological Process: transmembrane transport (GO:0055085);;	K02575|0|tcc:TCM_010451|Nitrate transporter2.5; K02575 MFS transporter, NNP family, nitrate/nitrite transporter (A)	--	--	Major Facilitator Superfamily	High affinity nitrate transporter 2.5 GN=NRT2.5 OS=Arabidopsis thaliana (Mouse-ear cress) PE=2 SV=1	G	Carbohydrate transport and metabolism	High affinity nitrate transporter 2.5 -like protein [Gossypium arboreum]	cellular component: cell (GO:0005623);; cellular component: membrane (GO:0016020);; cellular component: cell part (GO:0044464);; biological process: cellular process (GO:0009987);; biological process: single-organism process (GO:0044699);; biological process: localization (GO:0051179);; molecular function: transporter activity (GO:0005215);; cellular component: membrane part (GO:0044425)	Nitrogen metabolism (ko00910)	2	c	(AC)9aaaatctagttaaatttatttatactaaaatacttattc(T)14	71	3076	3146	ATGGCCAACACTAGGCATTC	59.962	20	AGCTTTTGTGTGTGTTCCTCA	58.411	21	266	2907	3172	ATGGCCAACACTAGGCATTC	59.962	20
c72869.graph_c0	15.93	12.65	14.34	14.6	15.51	13.23	13.83	12.58	10.13	13.6444	1.65933	0.121612	-0.153495	0.153495	-0.159822	0.159822	0.00293368	0.00293368	[S]	Function unknown	--	--	[T]	Signal transduction mechanisms	NB-ARC domain;; Leucine Rich repeats (2 copies);; Leucine Rich Repeat;; Leucine rich repeat	Putative disease resistance protein RGA4 GN=RGA4 OS=Solanum bulbocastanum (Wild potato) PE=2 SV=1	T	Signal transduction mechanisms	leucine-rich repeat containing protein, putative [Ricinus communis]	--	--	--	--	--	--	--	--	--	--	--	--	--	--	--	--	--	--	--	--
c51866.graph_c0	10.49	9.76	9.49	10.58	7.99	8.8	9.24	9.17	6.76	9.14222	1.13119	0.123733	-0.0680559	0.0680559	-0.159796	0.159796	-0.0805015	0.0805015	--	--	--	--	--	--	--	--	--	--	--	--	--	--	--	--	--	--	--	--	--	--	--	--	--	--	--	--	--	--	--
c70576.graph_c1	48.75	56.67	57.1	53.46	62.48	56.17	60.2	59.92	54.31	56.5622	3.88315	0.0686528	0.122872	0.122872	0.159641	0.159641	0.0463036	0.0463036	[E]	Amino acid transport and metabolism	Molecular Function: diaminopimelate decarboxylase activity (GO:0008836);; Biological Process: lysine biosynthetic process via diaminopimelate (GO:0009089);; Cellular Component: chloroplast (GO:0009507);;	K01586|0|pop:POPTR_0009s12210g|POPTRDRAFT_557223; diaminopimelate decarboxylase family protein; K01586 diaminopimelate decarboxylase [EC:4.1.1.20] (A)	[E]	Amino acid transport and metabolism	Pyridoxal-dependent decarboxylase, pyridoxal binding domain;; Alanine racemase, N-terminal domain	Diaminopimelate decarboxylase 1, chloroplastic (Precursor) GN=LYSA1 OS=Arabidopsis thaliana (Mouse-ear cress) PE=2 SV=1	E	Amino acid transport and metabolism	PREDICTED: diaminopimelate decarboxylase 2, chloroplastic-like [Populus euphratica]	biological process: metabolic process (GO:0008152);; molecular function: catalytic activity (GO:0003824);; biological process: cellular process (GO:0009987);; biological process: single-organism process (GO:0044699);; cellular component: cell (GO:0005623);; cellular component: organelle (GO:0043226);; cellular component: cell part (GO:0044464)	Lysine biosynthesis (ko00300);; Biosynthesis of amino acids (ko01230)	--	--	--	--	--	--	--	--	--	--	--	--	--	--	--	--	--	--
c62028.graph_c0	10.32	8.78	10.62	8.55	12.5	11.22	12.07	8.86	9.89	10.3122	1.35546	0.131442	0.161523	0.161523	0.158749	0.158749	0.00401734	0.00401734	--	--	--	K17906|5.2195e-114|cit:102612812|uncharacterized LOC102612812; K17906 autophagy-related protein 2 (A)	[U]	Intracellular trafficking, secretion, and vesicular transport	Autophagy-related protein 2 CAD motif	--	U	Intracellular trafficking, secretion, and vesicular transport	PREDICTED: uncharacterized protein LOC105112470 isoform X2 [Populus euphratica]	--	--	--	--	--	--	--	--	--	--	--	--	--	--	--	--	--	--	--	--
c67873.graph_c3	10.13	13.64	9.89	10.29	10.18	9.87	8.91	10.09	8.08	10.12	1.42068	0.140383	-0.0559985	0.0559985	-0.15842	0.15842	-0.0917931	0.0917931	--	--	--	--	--	--	--	--	S	Function unknown	hypothetical protein JCGZ_18645 [Jatropha curcas]	--	--	--	--	--	--	--	--	--	--	--	--	--	--	--	--	--	--	--	--
c70217.graph_c0	222.95	221.31	312.11	255.11	242.77	249.59	260.52	299.37	245.89	256.624	29.1758	0.113691	-0.0251505	0.0251505	0.158401	0.158401	0.193479	0.193479	--	--	--	--	--	--	C2 domain	--	R	General function prediction only	PREDICTED: uncharacterized protein LOC100262283 [Vitis vinifera]	--	--	--	--	--	--	--	--	--	--	--	--	--	--	--	--	--	--	--	--
c61924.graph_c0	33.04	32.2	33.05	27.53	27.42	31	23.75	25.07	25.98	28.7822	3.38825	0.11772	-0.146176	0.146176	-0.157899	0.157899	-0.0016558	0.0016558	--	--	Molecular Function: RNA binding (GO:0003723);; Molecular Function: metal ion binding (GO:0046872);;	--	[R]	General function prediction only	Zinc finger C-x8-C-x5-C-x3-H type (and similar);; KH domain;; Zinc finger C-x8-C-x5-C-x3-H type;; KH domain	Zinc finger CCCH domain-containing protein 14 OS=Oryza sativa subsp. japonica (Rice) PE=2 SV=1	R	General function prediction only	hypothetical protein JCGZ_26709 [Jatropha curcas]	molecular function: binding (GO:0005488)	--	--	--	--	--	--	--	--	--	--	--	--	--	--	--	--	--	--	--
c70179.graph_c1	26.2	25.94	27.8	28.39	33.32	30.07	27.91	30.13	28.75	28.7233	2.12555	0.0740008	0.159177	0.159177	0.157265	0.157265	0.00752036	0.00752036	--	--	Molecular Function: nucleic acid binding (GO:0003676);; Molecular Function: zinc ion binding (GO:0008270);; Biological Process: DNA integration (GO:0015074);;	--	[R]	General function prediction only	--	Endonuclease OS=Nicotiana tabacum (Common tobacco) PE=2 SV=1	R	General function prediction only	hypothetical protein VITISV_015538 [Vitis vinifera]	molecular function: binding (GO:0005488);; biological process: metabolic process (GO:0008152);; biological process: cellular process (GO:0009987)	--	1	p1	(A)11	11	1378	1388	TGGCTGGGATGATTCTCTCT	59.761	20	TAGCAGGCTCATGGACAGTG	60.008	20	168	1314	1481	CTGGCTGGGATGATTCTCTC	59.761	20
c68228.graph_c4	9.17	8.99	9.75	8.32	8.07	8.33	8.17	8.5	6.77	8.45222	0.787327	0.0931503	-0.154362	0.154362	-0.156886	0.156886	0.00748015	0.00748015	--	--	--	--	--	--	Plant protein of unknown function (DUF868);; Got1/Sft2-like family	--	S	Function unknown	hypothetical protein PRUPE_ppa017616mg [Prunus persica]	--	--	--	--	--	--	--	--	--	--	--	--	--	--	--	--	--	--	--	--
c61093.graph_c0	65.6	63	54.2	49.76	61.54	50.6	49.44	54.08	43.96	54.6867	6.82599	0.12482	-0.144626	0.144626	-0.156347	0.156347	-0.00264344	0.00264344	[U]	Intracellular trafficking, secretion, and vesicular transport	Cellular Component: nucleus (GO:0005634);; Cellular Component: endosome (GO:0005768);; Cellular Component: Golgi apparatus (GO:0005794);; Cellular Component: trans-Golgi network (GO:0005802);; Cellular Component: cytosol (GO:0005829);; Cellular Component: plasma membrane (GO:0005886);;	--	[S]	Function unknown	Yip1 domain	--	S	Function unknown	PREDICTED: protein YIPF6 homolog [Tarenaya hassleriana]	cellular component: cell (GO:0005623);; cellular component: organelle (GO:0043226);; cellular component: cell part (GO:0044464);; cellular component: organelle part (GO:0044422);; cellular component: membrane (GO:0016020)	--	--	--	--	--	--	--	--	--	--	--	--	--	--	--	--	--	--	--
c70221.graph_c0	58.94	59.15	53.86	51.43	38.22	37.99	51.88	51.12	34.21	48.5333	8.80878	0.1815	-0.0917261	0.0917261	-0.156237	0.156237	-0.0539466	0.0539466	[J]	Translation, ribosomal structure and biogenesis	Molecular Function: structural constituent of ribosome (GO:0003735);; Biological Process: DNA-templated transcription, elongation (GO:0006354);; Biological Process: translation (GO:0006412);; Cellular Component: chloroplast (GO:0009507);; Cellular Component: large ribosomal subunit (GO:0015934);;	--	--	--	Glutathione S-transferase, C-terminal domain;; Ribosomal protein L1p/L10e family	50S ribosomal protein L1, chloroplastic (Precursor) GN=RPL1 OS=Spinacia oleracea (Spinach) PE=1 SV=1	J	Translation, ribosomal structure and biogenesis	PREDICTED: 50S ribosomal protein L1, chloroplastic [Nelumbo nucifera]	molecular function: structural molecule activity (GO:0005198);; biological process: metabolic process (GO:0008152);; biological process: cellular process (GO:0009987);; cellular component: cell (GO:0005623);; cellular component: organelle (GO:0043226);; cellular component: cell part (GO:0044464);; cellular component: macromolecular complex (GO:0032991);; cellular component: organelle part (GO:004…	--	2	p1	(A)13	13	1945	1957	TGTACGAGTTCGAGCACCTG	60.049	20	GTCCACAAGCTTCCTGCTTC	59.997	20	240	1750	1989	TGTACGAGTTCGAGCACCTG	60.049	20
c68529.graph_c0	13.23	16.15	12.8	15.71	14.12	15.69	15.21	14.65	15.26	14.7578	1.09322	0.0740775	0.109573	0.109573	0.156076	0.156076	0.0579303	0.0579303	--	--	--	--	--	--	--	--	S	Function unknown	unnamed protein product [Vitis vinifera]	--	--	2	p1	(T)11	11	1214	1224	AAAACCGGTTCAATGTGGAG	59.83	20	GTGTGAGAGTCAACCAGGCA	59.872	20	157	1138	1294	AAAACCGGTTCAATGTGGAG	59.83	20
c57072.graph_c0	25.9	22.45	16.05	19.7	17.53	22.01	14.41	20.8	17.93	19.6422	3.361	0.171111	-0.0692203	0.0692203	-0.156072	0.156072	-0.074754	0.074754	[J]	Translation, ribosomal structure and biogenesis	Molecular Function: structural constituent of ribosome (GO:0003735);; Cellular Component: ribosome (GO:0005840);; Biological Process: rRNA processing (GO:0006364);; Biological Process: translation (GO:0006412);; Cellular Component: chloroplast stroma (GO:0009570);; Cellular Component: chloroplast envelope (GO:0009941);; Biological Process: photosystem II assembly (GO:0010207);; Biological Process…	K02906|2.5888e-136|pop:POPTR_0013s06710g|POPTRDRAFT_806997; hypothetical protein; K02906 large subunit ribosomal protein L3 (A)	[J]	Translation, ribosomal structure and biogenesis	Ribosomal protein L3	50S ribosomal protein L3-1, chloroplastic (Precursor) GN=RPL3A OS=Arabidopsis thaliana (Mouse-ear cress) PE=2 SV=1	J	Translation, ribosomal structure and biogenesis	hypothetical protein POPTR_0013s06710g [Populus trichocarpa]	molecular function: structural molecule activity (GO:0005198);; cellular component: cell (GO:0005623);; cellular component: macromolecular complex (GO:0032991);; cellular component: organelle (GO:0043226);; cellular component: cell part (GO:0044464);; biological process: metabolic process (GO:0008152);; biological process: cellular process (GO:0009987);; biological process: cellular component org…	Ribosome (ko03010)	--	--	--	--	--	--	--	--	--	--	--	--	--	--	--	--	--	--
c71743.graph_c0	8.19	7.75	6.31	8.1	7.85	7.61	8.77	6.81	7.32	7.63444	0.699843	0.0916691	0.125791	0.125791	0.15559	0.15559	0.0395762	0.0395762	--	--	--	--	[S]	Function unknown	MAGE family	--	S	Function unknown	PREDICTED: melanoma-associated antigen 8 isoform X2 [Vitis vinifera]	--	--	--	--	--	--	--	--	--	--	--	--	--	--	--	--	--	--	--	--
c68472.graph_c3	12.47	12.83	12.16	14.13	14.59	15.81	12.39	15.16	13.49	13.67	1.24518	0.0910883	0.198479	0.198479	0.155262	0.155262	-0.0328409	0.0328409	--	--	--	--	--	--	--	--	S	Function unknown	PREDICTED: protein MIZU-KUSSEI 1 [Vitis vinifera]	--	--	--	--	--	--	--	--	--	--	--	--	--	--	--	--	--	--	--	--
c57750.graph_c0	21.21	18.84	20.8	20.87	20.97	18.61	19.41	17.78	15.17	19.2956	1.86246	0.0965228	-0.00993605	0.00993605	-0.155042	0.155042	-0.136167	0.136167	--	--	Cellular Component: SCF ubiquitin ligase complex (GO:0019005);; Biological Process: methylglyoxal catabolic process to D-lactate (GO:0019243);;	K10290|1.22595e-167|vvi:100261191|F-box protein SKIP16-like; K10290 F-box protein 3 (A)	[P]	Inorganic ion transport and metabolism	Protein of unknown function (DUF525)	F-box protein SKIP16 GN=SKIP16 OS=Arabidopsis thaliana (Mouse-ear cress) PE=1 SV=1	P	Inorganic ion transport and metabolism	PREDICTED: F-box protein SKIP16 [Sesamum indicum]	cellular component: cell (GO:0005623);; cellular component: macromolecular complex (GO:0032991);; cellular component: cell part (GO:0044464);; biological process: metabolic process (GO:0008152);; biological process: cellular process (GO:0009987);; biological process: single-organism process (GO:0044699)	--	--	--	--	--	--	--	--	--	--	--	--	--	--	--	--	--	--	--
c68757.graph_c0	23.6	23.31	17.3	17.44	18.26	18.88	17.08	15.64	18.2	18.8567	2.60454	0.138123	-0.135023	0.135023	-0.154665	0.154665	-0.00939317	0.00939317	--	--	Molecular Function: binding (GO:0005488);; Biological Process: cellular process (GO:0009987);; Biological Process: cellular component organization (GO:0016043);; Cellular Component: plastid membrane (GO:0042170);; Cellular Component: chloroplast part (GO:0044434);;	--	[R]	General function prediction only	MORN repeat	Protein ACCUMULATION AND REPLICATION OF CHLOROPLASTS 3 (Precursor) GN=ARC3 OS=Arabidopsis thaliana (Mouse-ear cress) PE=1 SV=2	R	General function prediction only	unnamed protein product [Vitis vinifera]	molecular function: binding (GO:0005488);; biological process: cellular process (GO:0009987);; biological process: cellular component organization or biogenesis (GO:0071840);; cellular component: cell (GO:0005623);; cellular component: membrane (GO:0016020);; cellular component: organelle (GO:0043226);; cellular component: organelle part (GO:0044422);; cellular component: cell part (GO:0044464)	--	1	p1	(A)11	11	4090	4100	TCGAACAAATCGGAAGATCC	60.014	20	TTTCGTGCCTATCCTCAATG	58.721	20	239	3898	4136	TCGAACAAATCGGAAGATCC	60.014	20
c71824.graph_c2	22.63	25.11	27.21	21.76	24.48	23.37	22.72	22.6	24.69	23.8411	1.59532	0.0669145	-0.00152482	0.00152482	0.154562	0.154562	0.165766	0.165766	--	--	--	--	--	--	--	--	S	Function unknown	PREDICTED: uncharacterized protein LOC100259633 [Vitis vinifera]	--	--	3	p1	(T)12	12	3462	3473	TTTTGACTTCTGAATAAATGCGA	58.927	23	TGCAGACATGTTGAGGTTTGA	60.294	21	244	3273	3516	CCATAGATAATCACATTACTCGCAA	59.468	25
c63201.graph_c0	7.91	5.43	6.53	6.78	5.2	8.74	6.13	6.01	8.23	6.77333	1.18403	0.174808	0.105564	0.105564	0.154546	0.154546	0.0601317	0.0601317	[P]	Inorganic ion transport and metabolism	Molecular Function: catalytic activity (GO:0003824);; Biological Process: metabolic process (GO:0008152);; Molecular Function: pyridoxal phosphate binding (GO:0030170);;	--	--	--	Methionine gamma-lyase;; Cys/Met metabolism PLP-dependent enzyme	--	S	Function unknown	ynbB [Gossypium arboreum]	biological process: metabolic process (GO:0008152);; molecular function: catalytic activity (GO:0003824);; molecular function: binding (GO:0005488)	--	--	--	--	--	--	--	--	--	--	--	--	--	--	--	--	--	--	--
c63416.graph_c1	73.91	51.02	56.81	49.3	61.03	62.14	55.82	45.78	47.9	55.9678	8.32798	0.148799	-0.00379084	0.00379084	-0.154468	0.154468	-0.142938	0.142938	--	--	Cellular Component: cytosol (GO:0005829);; Cellular Component: plasma membrane (GO:0005886);; Biological Process: calcium ion transport (GO:0006816);; Biological Process: Golgi organization (GO:0007030);; Biological Process: response to salt stress (GO:0009651);; Molecular Function: glycolipid transporter activity (GO:0017089);; Biological Process: glycolipid transport (GO:0046836);; Molecular Fu…	--	[G]	Carbohydrate transport and metabolism	Glycolipid transfer protein (GLTP)	--	G	Carbohydrate transport and metabolism	hypothetical protein JCGZ_02355 [Jatropha curcas]	cellular component: cell (GO:0005623);; cellular component: cell part (GO:0044464);; cellular component: membrane (GO:0016020);; biological process: single-organism process (GO:0044699);; biological process: localization (GO:0051179);; biological process: cellular process (GO:0009987);; biological process: cellular component organization or biogenesis (GO:0071840);; biological process: response t…	--	--	--	--	--	--	--	--	--	--	--	--	--	--	--	--	--	--	--
c63818.graph_c0	47.33	44.15	46.8	41.78	43.8	48.55	47.05	47.38	47.27	46.0122	2.09764	0.0455887	0.00586204	0.00586204	0.153941	0.153941	0.157937	0.157937	[U]	Intracellular trafficking, secretion, and vesicular transport	Molecular Function: GTPase activity (GO:0003924);; Molecular Function: GTP binding (GO:0005525);; Biological Process: GTP catabolic process (GO:0006184);; Biological Process: SRP-dependent cotranslational protein targeting to membrane (GO:0006614);; Molecular Function: 7S RNA binding (GO:0008312);; Cellular Component: signal recognition particle (GO:0048500);;	K03106|0|tcc:TCM_027264|Signal recognition particle, SRP54 subunit protein; K03106 signal recognition particle subunit SRP54 (A)	[U]	Intracellular trafficking, secretion, and vesicular transport	SRP54-type protein, GTPase domain;; Signal peptide binding domain;; SRP54-type protein, helical bundle domain;; CobW/HypB/UreG, nucleotide-binding domain;; AAA domain;; Molybdopterin guanine dinucleotide synthesis protein B	Signal recognition particle 54 kDa protein 2 OS=Solanum lycopersicum (Tomato) PE=2 SV=1	U	Intracellular trafficking, secretion, and vesicular transport	Signal recognition particle, SRP54 subunit protein [Theobroma cacao]	biological process: metabolic process (GO:0008152);; biological process: cellular process (GO:0009987);; biological process: single-organism process (GO:0044699);; molecular function: catalytic activity (GO:0003824);; molecular function: binding (GO:0005488);; biological process: localization (GO:0051179);; biological process: cellular component organization or biogenesis (GO:0071840);; cellular …	Protein export (ko03060)	--	--	--	--	--	--	--	--	--	--	--	--	--	--	--	--	--	--
c60361.graph_c0	25.08	27.96	27.23	27.93	33.04	28.87	28.05	28.51	28.61	28.3644	1.96423	0.0692496	0.199077	0.199077	0.153479	0.153479	-0.0363151	0.0363151	[LKJ]	--	Molecular Function: nucleic acid binding (GO:0003676);; Molecular Function: ATP binding (GO:0005524);; Molecular Function: ATP-dependent helicase activity (GO:0008026);;	K12812|2.5024e-146|vvi:100250852|DEAD-box ATP-dependent RNA helicase 56; K12812 ATP-dependent RNA helicase UAP56/SUB2 [EC:3.6.4.13] (A)	[A]	RNA processing and modification	DEAD/DEAH box helicase	DEAD-box ATP-dependent RNA helicase 56 GN=F2I11.90 OS=Arabidopsis thaliana (Mouse-ear cress) PE=1 SV=2	A	RNA processing and modification	hypothetical protein EUGRSUZ_C01749 [Eucalyptus grandis]	molecular function: binding (GO:0005488);; biological process: metabolic process (GO:0008152);; biological process: cellular process (GO:0009987);; biological process: single-organism process (GO:0044699);; molecular function: catalytic activity (GO:0003824)	RNA transport (ko03013);; mRNA surveillance pathway (ko03015);; Spliceosome (ko03040)	--	--	--	--	--	--	--	--	--	--	--	--	--	--	--	--	--	--
c69105.graph_c1	26.82	16.33	19.75	25.49	20.38	20.26	29.17	21.44	19.02	22.0733	3.92754	0.177932	0.062245	0.062245	0.153454	0.153454	0.1004	0.1004	--	--	Cellular Component: nuclear pore (GO:0005643);; Cellular Component: cytosol (GO:0005829);; Molecular Function: structural constituent of nuclear pore (GO:0017056);;	K14306|4.07847e-122|pper:PRUPE_ppa002546mg|hypothetical protein; K14306 nuclear pore complex protein Nup62 (A)	[Y]	Nuclear structure	Nsp1-like C-terminal region	Nuclear pore complex protein NUP62 {ECO:0000303|PubMed:21189294} OS=Arabidopsis thaliana (Mouse-ear cress) PE=1 SV=1	Y	Nuclear structure	hypothetical protein PRUPE_ppa002546mg [Prunus persica]	cellular component: cell (GO:0005623);; cellular component: membrane (GO:0016020);; cellular component: macromolecular complex (GO:0032991);; cellular component: organelle (GO:0043226);; cellular component: organelle part (GO:0044422);; cellular component: membrane part (GO:0044425);; cellular component: cell part (GO:0044464);; molecular function: structural molecule activity (GO:0005198)	RNA transport (ko03013)	1	p1	(T)12	12	1877	1888	GATAGGGAGCTGATGGGTCC	60.822	20	CCACATAATTCCGATGCAGA	59.499	20	256	1807	2062	AGCTGATGGGTCCAAAACTC	59.141	20
c69934.graph_c4	37.86	26.78	26.91	40.64	33.1	32.29	33.32	38.39	30.96	33.3611	4.59979	0.137879	0.186725	0.186725	0.153268	0.153268	-0.0240076	0.0240076	--	--	Cellular Component: cytosol (GO:0005829);; Biological Process: intracellular protein transport (GO:0006886);; Biological Process: ER to Golgi vesicle-mediated transport (GO:0006888);; Molecular Function: zinc ion binding (GO:0008270);; Cellular Component: COPII vesicle coat (GO:0030127);;	--	[U]	Intracellular trafficking, secretion, and vesicular transport	--	--	U	Intracellular trafficking, secretion, and vesicular transport	hypothetical protein JCGZ_14113 [Jatropha curcas]	cellular component: cell (GO:0005623);; cellular component: cell part (GO:0044464);; biological process: localization (GO:0051179);; biological process: single-organism process (GO:0044699);; molecular function: binding (GO:0005488);; cellular component: membrane (GO:0016020);; cellular component: macromolecular complex (GO:0032991);; cellular component: organelle (GO:0043226);; cellular componen…	--	2	p1	(T)16	16	911	926	CTTTCATTGCCTTGGATGGT	59.933	20	AATTTTGGCGGAGGAAATCT	59.909	20	276	880	1155	CTTTCATTGCCTTGGATGGT	59.933	20
c59706.graph_c1	12.65	10.73	10.6	11.42	11.28	12.98	11.07	11.99	12.06	11.6422	0.783663	0.0673122	0.114223	0.114223	0.152906	0.152906	0.0488894	0.0488894	--	--	Biological Process: protein transport (GO:0015031);;	K12193|1.08703e-103|pop:POPTR_0008s03470g|POPTRDRAFT_720579; SNF7 family protein; K12193 charged multivesicular body protein 3 (A)	[U]	Intracellular trafficking, secretion, and vesicular transport	Snf7	Vacuolar protein sorting-associated protein 24 homolog 1 GN=MRN17.18 OS=Arabidopsis thaliana (Mouse-ear cress) PE=1 SV=1	U	Intracellular trafficking, secretion, and vesicular transport	PREDICTED: vacuolar protein sorting-associated protein 24 homolog 1 isoform X1 [Populus euphratica]	biological process: localization (GO:0051179)	Endocytosis (ko04144)	2	p1	(A)10	10	1698	1707	TGCCAATCTCTCAATTGCTG	59.948	20	CAAATCAATTGCACCCTCCT	59.933	20	261	1558	1818	TGCCAATCTCTCAATTGCTG	59.948	20
c65576.graph_c1	11.33	15.19	11.23	12.88	13.56	13.19	12.43	12.2	14.37	12.9311	1.24191	0.0960406	0.10501	0.10501	0.152818	0.152818	0.0588447	0.0588447	[L]	Replication, recombination and repair	--	K10706|0|vvi:100263445|probable helicase MAGATAMA 3; K10706 senataxin [EC:3.6.4.-] (A)	[A]	RNA processing and modification	AAA domain	Probable helicase MAGATAMA 3 GN=MAA3 OS=Arabidopsis thaliana (Mouse-ear cress) PE=2 SV=1	A	RNA processing and modification	PREDICTED: probable helicase MAGATAMA 3 isoform X2 [Vitis vinifera]	--	--	--	--	--	--	--	--	--	--	--	--	--	--	--	--	--	--	--	--
c64164.graph_c0	23.07	18.96	21.55	20.41	18.68	21.81	20.93	16.79	16.23	19.8256	2.19098	0.110513	-0.0498317	0.0498317	-0.152734	0.152734	-0.0934023	0.0934023	[LKJ]	--	Molecular Function: RNA binding (GO:0003723);; Molecular Function: ATP binding (GO:0005524);; Molecular Function: ATP-dependent helicase activity (GO:0008026);;	K13179|0|rcu:RCOM_0364160|dead box ATP-dependent RNA helicase, putative; K13179 ATP-dependent RNA helicase DDX18/HAS1 [EC:3.6.4.13] (A)	[A]	RNA processing and modification	DEAD/DEAH box helicase;; Helicase conserved C-terminal domain	DEAD-box ATP-dependent RNA helicase 51 GN=RH51 OS=Arabidopsis thaliana (Mouse-ear cress) PE=2 SV=1	A	RNA processing and modification	hypothetical protein JCGZ_19228 [Jatropha curcas]	molecular function: binding (GO:0005488);; biological process: metabolic process (GO:0008152);; biological process: cellular process (GO:0009987);; biological process: single-organism process (GO:0044699);; molecular function: catalytic activity (GO:0003824)	--	1	p1	(T)10	10	3532	3541	CAGTAAGCCTTTCCAGGTGC	59.875	20	GAAAAGCAGAACGAAGCAGC	60.278	20	280	3356	3635	CAGTAAGCCTTTCCAGGTGC	59.875	20
c67364.graph_c0	8.16	10.16	9.28	7.54	11.73	10.74	8.04	13.13	8.38	9.68444	1.7916	0.184998	0.121309	0.121309	0.152617	0.152617	0.0409101	0.0409101	--	--	--	--	[R]	General function prediction only	PPR repeat;; PPR repeat family;; Pentatricopeptide repeat domain;; PPR repeat;; Tetratricopeptide repeat	Pentatricopeptide repeat-containing protein At1g02370, mitochondrial (Precursor) GN=At1g02370 OS=Arabidopsis thaliana (Mouse-ear cress) PE=2 SV=1	R	General function prediction only	PREDICTED: pentatricopeptide repeat-containing protein At1g02370, mitochondrial [Prunus mume]	--	--	--	--	--	--	--	--	--	--	--	--	--	--	--	--	--	--	--	--
c61701.graph_c0	7.3	5.99	5	6.16	5.74	5.69	6.61	6.09	6.14	6.08	0.598294	0.0984036	-0.00884784	0.00884784	0.152238	0.152238	0.171216	0.171216	--	--	Molecular Function: protein serine/threonine kinase activity (GO:0004674);; Molecular Function: ATP binding (GO:0005524);; Biological Process: protein phosphorylation (GO:0006468);;	--	[T]	Signal transduction mechanisms	--	Probable LRR receptor-like serine/threonine-protein kinase At1g56130 (Precursor) GN=At1g56130 OS=Arabidopsis thaliana (Mouse-ear cress) PE=2 SV=2	T	Signal transduction mechanisms	hypothetical protein VITISV_004098 [Vitis vinifera]	biological process: metabolic process (GO:0008152);; biological process: cellular process (GO:0009987);; molecular function: catalytic activity (GO:0003824);; molecular function: binding (GO:0005488)	--	1	p1	(A)15	15	1325	1339	CATTTCGAACTTAATGAAAAGCTG	59.371	24	CTTGTTGGTTCCCTCCTCTG	59.691	20	203	1167	1369	CATTTCGAACTTAATGAAAAGCTG	59.371	24
c72646.graph_c0	14.53	13.15	13.6	11.15	10.1	10.19	11.34	11.08	12.79	11.9922	1.48315	0.123676	0.0396806	0.0396806	0.151557	0.151557	0.121857	0.121857	--	--	Molecular Function: binding (GO:0005488);;	--	[R]	General function prediction only	Reverse transcriptase (RNA-dependent DNA polymerase)	Endonuclease OS=Nicotiana tabacum (Common tobacco) PE=2 SV=1	R	General function prediction only	hypothetical protein VITISV_013500 [Vitis vinifera]	molecular function: binding (GO:0005488)	--	--	--	--	--	--	--	--	--	--	--	--	--	--	--	--	--	--	--
c57800.graph_c2	15.35	13.73	15.17	14.65	13.54	13.93	15.84	16.91	12.79	14.6567	1.21747	0.0830663	-0.0251924	0.0251924	0.151144	0.151144	0.186375	0.186375	--	--	--	--	--	--	--	--	S	Function unknown	Wound-responsive family protein, putative isoform 3 [Theobroma cacao]	--	--	--	--	--	--	--	--	--	--	--	--	--	--	--	--	--	--	--	--
c71299.graph_c1	44.91	49.2	42.04	47.18	41.11	44.31	51.69	42.16	40.8	44.8222	3.60474	0.0804231	0.0520864	0.0520864	0.150971	0.150971	0.10946	0.10946	[J]	Translation, ribosomal structure and biogenesis	Molecular Function: nucleic acid binding (GO:0003676);; Cellular Component: nucleolus (GO:0005730);; Cellular Component: cytosol (GO:0005829);; Biological Process: rRNA processing (GO:0006364);; Biological Process: protein import into nucleus (GO:0006606);; Cellular Component: ribonucleoprotein complex (GO:0030529);;	K14559|1.09212e-126|cit:102625616|U3 small nucleolar ribonucleoprotein protein MPP10-like; K14559 U3 small nucleolar RNA-associated protein MPP10 (A)	[A]	RNA processing and modification	Mpp10 protein	--	A	RNA processing and modification	PREDICTED: U3 small nucleolar ribonucleoprotein protein MPP10-like [Citrus sinensis]	molecular function: binding (GO:0005488);; cellular component: cell (GO:0005623);; cellular component: membrane-enclosed lumen (GO:0031974);; cellular component: organelle (GO:0043226);; cellular component: organelle part (GO:0044422);; cellular component: cell part (GO:0044464);; biological process: metabolic process (GO:0008152);; biological process: cellular process (GO:0009987);; biological p…	Ribosome biogenesis in eukaryotes (ko03008)	1	p1	(A)12	12	1830	1841	CCCCAAAAGTCCGAACTCTAC	59.984	21	TTGCGCACTTACCCATTTTT	60.488	20	172	1711	1882	CCCCAAAAGTCCGAACTCTAC	59.984	21
c69719.graph_c1	31.54	38.22	26.12	31.03	35.33	28.74	37.21	34.55	29.77	32.5011	3.83683	0.118052	0.0512968	0.0512968	0.150602	0.150602	0.109223	0.109223	[RTKL]	--	Molecular Function: nucleotide binding (GO:0000166);; Molecular Function: protein kinase activity (GO:0004672);; Biological Process: cellular protein modification process (GO:0006464);; Biological Process: phosphorylation (GO:0016310);;	K04733|2.36018e-122|mdm:103416216|U-box domain-containing protein 33-like; K04733 interleukin-1 receptor-associated kinase 4 [EC:2.7.11.1] (A)	--	--	Protein kinase domain;; Protein tyrosine kinase;; U-box domain	Serine/threonine-protein kinase GN=PUB33 OS=Arabidopsis thaliana (Mouse-ear cress) PE=2 SV=2	T	Signal transduction mechanisms	PREDICTED: U-box domain-containing protein 33-like, partial [Malus domestica]	molecular function: binding (GO:0005488);; biological process: metabolic process (GO:0008152);; biological process: cellular process (GO:0009987);; molecular function: catalytic activity (GO:0003824)	--	--	--	--	--	--	--	--	--	--	--	--	--	--	--	--	--	--	--
c72241.graph_c2	11.83	10.52	12.28	12.42	12.27	10.93	10.87	10.02	15.83	11.8856	1.61384	0.135781	0.0916888	0.0916888	0.150156	0.150156	0.0681424	0.0681424	--	--	--	--	--	--	--	--	--	--	--	--	--	--	--	--	--	--	--	--	--	--	--	--	--	--	--	--	--	--	--
c65901.graph_c5	14.39	10.37	11.17	8.82	11.74	11.08	9.53	10.86	11.63	11.0656	1.48185	0.133916	0.0912286	0.0912286	0.149272	0.149272	0.0668245	0.0668245	--	--	--	--	[R]	General function prediction only	PPR repeat family;; PPR repeat;; Pentatricopeptide repeat domain;; PPR repeat;; Tetratricopeptide repeat	Pentatricopeptide repeat-containing protein At5g48910 GN=PCMP-H38 OS=Arabidopsis thaliana (Mouse-ear cress) PE=2 SV=1	R	General function prediction only	PREDICTED: pentatricopeptide repeat-containing protein At5g66520-like [Prunus mume]	--	--	--	--	--	--	--	--	--	--	--	--	--	--	--	--	--	--	--	--
c72173.graph_c1	9.46	9.92	10.73	14.15	10.83	11.75	9.45	8.78	10.18	10.5833	1.51164	0.142832	0.174212	0.174212	0.148894	0.148894	-0.0159124	0.0159124	--	--	--	--	--	--	--	--	--	--	--	--	--	1	p1	(A)10	10	2444	2453	TCCATTCTTTCACTTTCTCGAAC	59.755	23	CATCCTACGTTTTGGTTCCC	59.288	20	209	2320	2528	TCCATTCTTTCACTTTCTCGAAC	59.755	23
c64848.graph_c0	13.04	12.68	18.49	14.91	15.51	17.88	13.76	15.84	14.81	15.2133	1.88079	0.123628	0.195316	0.195316	0.148845	0.148845	-0.0368609	0.0368609	[R]	General function prediction only	Molecular Function: nucleotide binding (GO:0000166);; Cellular Component: heterotrimeric G-protein complex (GO:0005834);; Biological Process: G-protein coupled receptor signaling pathway (GO:0007186);; Biological Process: vegetative to reproductive phase transition of meristem (GO:0010228);; Molecular Function: histone binding (GO:0042393);; Cellular Component: Set1C/COMPASS complex (GO:0048188);;	K14963|0|pvu:PHAVU_003G104000g|hypothetical protein; K14963 COMPASS component SWD3 (A)	[R]	General function prediction only	WD domain, G-beta repeat;; Nucleoporin Nup120/160;; Eukaryotic translation initiation factor eIF2A	Protein Mut11 GN=Mut11 OS=Chlamydomonas reinhardtii (Chlamydomonas smithii) PE=2 SV=1	R	General function prediction only	hypothetical protein JCGZ_12607 [Jatropha curcas]	molecular function: binding (GO:0005488);; cellular component: cell (GO:0005623);; cellular component: membrane (GO:0016020);; cellular component: macromolecular complex (GO:0032991);; cellular component: membrane part (GO:0044425);; cellular component: cell part (GO:0044464);; biological process: cellular process (GO:0009987);; biological process: signaling (GO:0023052);; biological process: sin…	--	--	--	--	--	--	--	--	--	--	--	--	--	--	--	--	--	--	--
c65142.graph_c0	9.02	8.23	7.87	9.07	5.93	6.8	7.86	7.25	5.9	7.54778	1.11213	0.147346	-0.167939	0.167939	-0.148768	0.148768	0.0308947	0.0308947	--	--	Molecular Function: catalytic activity (GO:0003824);; Biological Process: metabolic process (GO:0008152);; Cellular Component: membrane (GO:0016020);;	--	[GMW]	--	Exostosin family;; Exostosin family	Probable glucuronoxylan glucuronosyltransferase F8H GN=F8H OS=Arabidopsis thaliana (Mouse-ear cress) PE=2 SV=1	W	Extracellular structures	PREDICTED: LOW QUALITY PROTEIN: uncharacterized protein LOC103927745 [Pyrus x bretschneideri]	biological process: metabolic process (GO:0008152);; molecular function: catalytic activity (GO:0003824);; cellular component: membrane (GO:0016020)	--	--	--	--	--	--	--	--	--	--	--	--	--	--	--	--	--	--	--
c68839.graph_c1	81.11	67.1	73.71	73.51	88.15	76.47	70.44	75.47	79.26	76.1356	5.83349	0.0766198	0.151706	0.151706	0.148556	0.148556	0.00563845	0.00563845	[K]	Transcription	Molecular Function: nucleotide binding (GO:0000166);; Biological Process: RNA splicing, via endonucleolytic cleavage and ligation (GO:0000394);; Molecular Function: DNA-directed RNA polymerase activity (GO:0003899);; Cellular Component: DNA-directed RNA polymerase II, core complex (GO:0005665);; Biological Process: transcription from RNA polymerase II promoter (GO:0006366);;	K03012|4.88915e-83|pop:POPTR_0007s06660g|hypothetical protein; K03012 DNA-directed RNA polymerase II subunit RPB4 (A)	[K]	Transcription	RNA polymerase Rpb4	DNA-directed RNA polymerase II subunit 4 GN=MYH9.13 OS=Arabidopsis thaliana (Mouse-ear cress) PE=1 SV=1	K	Transcription	hypothetical protein POPTR_0005s08690g [Populus trichocarpa]	molecular function: binding (GO:0005488);; biological process: metabolic process (GO:0008152);; biological process: cellular process (GO:0009987);; molecular function: catalytic activity (GO:0003824);; cellular component: cell (GO:0005623);; cellular component: membrane-enclosed lumen (GO:0031974);; cellular component: macromolecular complex (GO:0032991);; cellular component: organelle (GO:004322…	Purine metabolism (ko00230);; Pyrimidine metabolism (ko00240);; RNA polymerase (ko03020)	2	p1	(A)10	10	1974	1983	TTCTTCCTCTTCTCCCGACA	59.92	20	ACCTCAATTCACCGGCATAG	59.955	20	279	1764	2042	AGCGAACGGATCAAACAAAC	60.118	20
c68794.graph_c0	26.26	39.57	25.56	28.07	25.7	22.43	27.63	35.73	33.3	29.3611	5.27544	0.179674	0.142773	0.142773	0.14713	0.14713	0.0161714	0.0161714	--	--	Molecular Function: catalytic activity (GO:0003824);;	K00700|2.71174e-53|tcc:TCM_022491|Starch branching enzyme 2.1 isoform 1; K00700 1,4-alpha-glucan branching enzyme [EC:2.4.1.18] (A)	[G]	Carbohydrate transport and metabolism	--	1,4-alpha-glucan-branching enzyme 1, chloroplastic/amyloplastic (Precursor) GN=SBEI OS=Pisum sativum (Garden pea) PE=1 SV=1	G	Carbohydrate transport and metabolism	Starch branching enzyme 2.1 isoform 4 [Theobroma cacao]	biological process: metabolic process (GO:0008152);; molecular function: catalytic activity (GO:0003824)	Starch and sucrose metabolism (ko00500)	2	p1	(T)13	13	520	532	GCTTGAAGAACCAGAAACGC	60	20	TAAGTCGAGGCCTGACGAGT	60.012	20	238	335	572	GCTTGAAGAACCAGAAACGC	60	20
c69509.graph_c1	113.04	144.04	152	118.65	138.22	137.09	144.6	140.96	146.26	137.207	12.2278	0.0891194	-0.0309347	0.0309347	0.146729	0.146729	0.187423	0.187423	--	--	--	K17087|1.58394e-41|tcc:TCM_006937|Transmembrane nine 1; K17087 transmembrane 9 superfamily member 3 (A)	[U]	Intracellular trafficking, secretion, and vesicular transport	Endomembrane protein 70	Transmembrane 9 superfamily member 1 {ECO:0000305} (Precursor) OS=Arabidopsis thaliana (Mouse-ear cress) PE=1 SV=1	U	Intracellular trafficking, secretion, and vesicular transport	BnaCnng11910D [Brassica napus]	--	--	1	p3	(CTC)5	15	97	111	GCTCACTCTCAGTCTTCGCC	60.292	20	CTATCCATGTGCAACAACCG	59.988	20	232	70	301	GCTCACTCTCAGTCTTCGCC	60.292	20
c68704.graph_c0	21.99	17.56	22.56	23.81	15.54	23	21.32	24.88	20	21.1844	2.84421	0.134259	0.0199171	0.0199171	0.146717	0.146717	0.138531	0.138531	--	--	--	--	--	--	--	--	--	--	--	--	--	--	--	--	--	--	--	--	--	--	--	--	--	--	--	--	--	--	--
c56996.graph_c0	7.07	8.78	9.87	7.59	8.04	8.27	7.04	8.5	8.48	8.18222	0.837719	0.102383	-0.186329	0.186329	-0.146246	0.146246	0.0502233	0.0502233	--	--	Biological Process: DNA damage checkpoint (GO:0000077);; Cellular Component: nucleolus (GO:0005730);; Biological Process: DNA repair (GO:0006281);; Cellular Component: checkpoint clamp complex (GO:0030896);;	K10903|0|tcc:TCM_027268|F6D8.25; K10903 HUS1 checkpoint protein (A)	[DL]	--	Hus1-like protein	--	L	Replication, recombination and repair	F6D8.25 [Theobroma cacao]	biological process: cellular process (GO:0009987);; biological process: single-organism process (GO:0044699);; biological process: response to stimulus (GO:0050896);; cellular component: cell (GO:0005623);; cellular component: membrane-enclosed lumen (GO:0031974);; cellular component: organelle (GO:0043226);; cellular component: organelle part (GO:0044422);; cellular component: cell part (GO:0044…	--	2	p1	(T)11	11	2058	2068	GCCATTTGATTCGACAATCC	60.282	20	TTGCTTCGATTTTTCCATCC	60.016	20	243	2020	2262	GCCATTTGATTCGACAATCC	60.282	20
c62092.graph_c0	31.87	25.9	28.37	29.65	30.27	32.96	29.26	29	30.76	29.7822	1.93273	0.0648956	0.138157	0.138157	0.146182	0.146182	0.0175741	0.0175741	--	--	Cellular Component: chloroplast inner membrane (GO:0009706);;	--	[S]	Function unknown	--	--	S	Function unknown	hypothetical protein PRUPE_ppa011494mg [Prunus persica]	cellular component: cell (GO:0005623);; cellular component: membrane (GO:0016020);; cellular component: organelle (GO:0043226);; cellular component: organelle part (GO:0044422);; cellular component: cell part (GO:0044464)	--	--	--	--	--	--	--	--	--	--	--	--	--	--	--	--	--	--	--
c67029.graph_c0	9.24	10.96	9.48	10.87	11.34	11.3	10.24	11.5	10.12	10.5611	0.781771	0.0740235	0.157632	0.157632	0.146026	0.146026	-0.00139913	0.00139913	[R]	General function prediction only	--	K14553|0|vvi:100263672|U3 small nucleolar RNA-associated protein 18 homolog; K14553 U3 small nucleolar RNA-associated protein 18 (A)	[R]	General function prediction only	WD domain, G-beta repeat	U3 small nucleolar RNA-associated protein 18 homolog GN=At5g14050 OS=Arabidopsis thaliana (Mouse-ear cress) PE=1 SV=1	R	General function prediction only	PREDICTED: U3 small nucleolar RNA-associated protein 18 homolog [Vitis vinifera]	--	Ribosome biogenesis in eukaryotes (ko03008)	--	--	--	--	--	--	--	--	--	--	--	--	--	--	--	--	--	--
c65754.graph_c0	17.74	16.05	15.35	19.93	21.33	18.52	17.01	16.7	18.56	17.91	1.79157	0.100032	0.12766	0.12766	0.14599	0.14599	0.0284852	0.0284852	[K]	Transcription	--	K11797|0|vvi:100248159|bromodomain and WD repeat-containing protein 3; K11797 PH-interacting protein (A)	[R]	General function prediction only	Bromodomain;; RNA polymerases M/15 Kd subunit;; Transcription factor S-II (TFIIS)	DNA-directed RNA polymerases II, IV and V subunit 9A GN=K14A17 OS=Arabidopsis thaliana (Mouse-ear cress) PE=1 SV=1	R	General function prediction only	PREDICTED: bromodomain and WD repeat-containing protein 3 isoform X1 [Vitis vinifera]	--	--	2	c	(T)11ctttaattagagttgagatagatctaaggggaaattagctagttttagtggaaaattttccacaagacaattcattcgtgcataaatacactaactg(ATC)5	123	3756	3878	TCATTCATGCAATTGCTTTTC	58.76	21	TGTGTTCGAAAATATGCCCA	59.93	20	219	3694	3912	TCATTCATGCAATTGCTTTTC	58.76	21
c68296.graph_c1	10.73	9.66	11.64	8.54	11.12	12.25	6.61	11.92	10.06	10.2811	1.70807	0.166137	-0.00592377	0.00592377	-0.145962	0.145962	-0.12974	0.12974	--	--	--	--	--	--	--	--	--	--	--	--	--	--	--	--	--	--	--	--	--	--	--	--	--	--	--	--	--	--	--
c60773.graph_c1	35.82	34.43	30.87	35.46	37.35	37.19	38.02	32.85	32.45	34.9378	2.32845	0.0666455	0.167226	0.167226	0.145762	0.145762	-0.0119155	0.0119155	[R]	General function prediction only	Molecular Function: tRNA binding (GO:0000049);; Biological Process: mitotic G2 phase (GO:0000085);; Molecular Function: aminoacyl-tRNA ligase activity (GO:0004812);; Cellular Component: cytosol (GO:0005829);; Biological Process: pyrimidine ribonucleotide biosynthetic process (GO:0009220);; Cellular Component: plasmodesma (GO:0009506);; Biological Process: photomorphogenesis (GO:0009640);; Biologi…	K15437|2.99602e-156|tcc:TCM_045490|OB-fold nucleic acid binding domain-containing protein isoform 1; K15437 aminoacyl tRNA synthase complex-interacting multifunctional protein 1 (A)	[J]	Translation, ribosomal structure and biogenesis	Putative tRNA binding domain	Probable methionine--tRNA ligase OS=Oryza sativa subsp. japonica (Rice) PE=2 SV=2	J	Translation, ribosomal structure and biogenesis	OB-fold nucleic acid binding domain-containing protein isoform 2 [Theobroma cacao]	molecular function: binding (GO:0005488);; biological process: biological phase (GO:0044848);; biological process: metabolic process (GO:0008152);; molecular function: catalytic activity (GO:0003824);; cellular component: cell (GO:0005623);; cellular component: cell part (GO:0044464);; biological process: cellular process (GO:0009987);; biological process: single-organism process (GO:0044699);; c…	--	--	--	--	--	--	--	--	--	--	--	--	--	--	--	--	--	--	--
c52803.graph_c0	22.81	21.37	20.23	19.79	17.31	18.68	18.55	17.65	17.45	19.3156	1.78761	0.0925475	-0.158083	0.158083	-0.145672	0.145672	0.0230641	0.0230641	[DT]	--	Molecular Function: phosphatase activator activity (GO:0019211);;	K17605|0|tcc:TCM_034874|Phosphotyrosyl phosphatase activator (PTPA) family protein; K17605 serine/threonine-protein phosphatase 2A activator (A)	[DT]	--	Phosphotyrosyl phosphate activator (PTPA) protein	--	T	Signal transduction mechanisms	PREDICTED: serine/threonine-protein phosphatase 2A activator [Eucalyptus grandis]	biological process: biological regulation (GO:0065007);; molecular function: enzyme regulator activity (GO:0030234)	--	--	--	--	--	--	--	--	--	--	--	--	--	--	--	--	--	--	--
c59557.graph_c0	29.84	42.14	28.17	25.59	27.74	32.03	23.05	28.68	29.17	29.6011	5.0413	0.170308	-0.103751	0.103751	-0.145453	0.145453	-0.0292407	0.0292407	[MG]	--	--	--	--	--	--	--	S	Function unknown	PREDICTED: uncharacterized protein LOC105115393 [Populus euphratica]	--	--	--	--	--	--	--	--	--	--	--	--	--	--	--	--	--	--	--	--
c65418.graph_c0	19.32	15.79	12.96	14.06	17.17	16.61	15.85	11.31	13.84	15.2122	2.28307	0.150081	0.0510532	0.0510532	-0.145225	0.145225	-0.188186	0.188186	[Q]	Secondary metabolites biosynthesis, transport and catabolism	Molecular Function: copper ion binding (GO:0005507);; Molecular Function: primary amine oxidase activity (GO:0008131);; Biological Process: amine metabolic process (GO:0009308);; Molecular Function: quinone binding (GO:0048038);; Biological Process: oxidation-reduction process (GO:0055114);;	K00276|0|cit:102610710|copper amine oxidase 1-like; K00276 primary-amine oxidase [EC:1.4.3.21] (A)	[Q]	Secondary metabolites biosynthesis, transport and catabolism	Copper amine oxidase, enzyme domain;; Copper amine oxidase, N3 domain;; Copper amine oxidase, N2 domain	Primary amine oxidase (Precursor) OS=Pisum sativum (Garden pea) PE=1 SV=1	Q	Secondary metabolites biosynthesis, transport and catabolism	PREDICTED: copper amine oxidase 1-like [Citrus sinensis]	molecular function: binding (GO:0005488);; biological process: metabolic process (GO:0008152);; biological process: single-organism process (GO:0044699);; molecular function: catalytic activity (GO:0003824)	Glycine, serine and threonine metabolism (ko00260);; Tyrosine metabolism (ko00350);; Phenylalanine metabolism (ko00360);; beta-Alanine metabolism (ko00410);; Isoquinoline alkaloid biosynthesis (ko00950);; Tropane, piperidine and pyridine alkaloid biosynthesis (ko00960)	--	--	--	--	--	--	--	--	--	--	--	--	--	--	--	--	--	--
c73394.graph_c0	27.67	28.22	22.2	23.94	29.23	30.74	24.81	31.17	23.9	26.8756	3.0724	0.11432	0.149686	0.149686	0.145202	0.145202	0.0057958	0.0057958	--	--	Molecular Function: transferase activity (GO:0016740);;	--	--	--	--	Uncharacterized protein At4g14100 (Precursor) GN=At4g14100 OS=Arabidopsis thaliana (Mouse-ear cress) PE=2 SV=1	R	General function prediction only	PREDICTED: uncharacterized protein At4g14100-like isoform X1 [Citrus sinensis]	biological process: metabolic process (GO:0008152);; molecular function: catalytic activity (GO:0003824)	--	--	--	--	--	--	--	--	--	--	--	--	--	--	--	--	--	--	--
c72330.graph_c1	69.12	74.82	65.53	75.5	76.5	89.81	84	86.55	85.49	78.5911	7.84929	0.099875	0.138646	0.138646	0.145037	0.145037	0.0173068	0.0173068	--	--	--	--	[Z]	Cytoskeleton	VHS domain;; ACT domain;; GAT domain	Kinesin-like protein KCA2 GN=MNA5.20 OS=Arabidopsis thaliana (Mouse-ear cress) PE=1 SV=1	Z	Cytoskeleton	ATP binding protein, putative [Ricinus communis]	--	--	2	p1	(T)15	15	4608	4622	GGCCTGTTTTCTTGAAAGAGC	60.366	21	AAAACATTTCCAGCCTAACAGC	59.672	22	275	4377	4651	CCTGTTTTCTTGAAAGAGCCA	59.48	21
c59977.graph_c0	20.64	16.57	17.47	18.15	15.79	16.22	13.3	17.09	15.12	16.7056	1.92938	0.115493	-0.0795945	0.0795945	-0.144952	0.144952	-0.0543069	0.0543069	--	--	--	K17985|7.70224e-18|tcc:TCM_003819|Transducin family protein / WD-40 repeat family protein isoform 1; K17985 activating molecule in BECN1-regulated autophagy protein 1 (A)	[R]	General function prediction only	--	--	R	General function prediction only	Transducin family protein / WD-40 repeat family protein isoform 1 [Theobroma cacao]	--	--	--	--	--	--	--	--	--	--	--	--	--	--	--	--	--	--	--	--
c68317.graph_c0	44.65	35.34	38.53	43.93	40.2	46.35	39.8	35.52	39.81	40.4589	3.64475	0.0900852	0.196771	0.196771	0.144551	0.144551	-0.0422948	0.0422948	[G]	Carbohydrate transport and metabolism	Biological Process: maltose metabolic process (GO:0000023);; Molecular Function: alpha-amylase activity (GO:0004556);; Biological Process: starch catabolic process (GO:0005983);; Biological Process: pentose-phosphate shunt (GO:0006098);; Cellular Component: chloroplast stroma (GO:0009570);; Biological Process: plant-type cell wall organization (GO:0009664);; Molecular Function: limit dextrinase a…	--	[G]	Carbohydrate transport and metabolism	Carbohydrate-binding module 48 (Isoamylase N-terminal domain);; Alpha amylase, catalytic domain;; Domain of unknown function (DUF3372)	Pullulanase 1, chloroplastic (Precursor) GN=T19N18.90 OS=Arabidopsis thaliana (Mouse-ear cress) PE=2 SV=2	G	Carbohydrate transport and metabolism	PREDICTED: pullulanase 1, chloroplastic isoform X3 [Vitis vinifera]	biological process: metabolic process (GO:0008152);; biological process: cellular process (GO:0009987);; biological process: single-organism process (GO:0044699);; molecular function: catalytic activity (GO:0003824);; cellular component: cell (GO:0005623);; cellular component: organelle (GO:0043226);; cellular component: organelle part (GO:0044422);; cellular component: cell part (GO:0044464);; b…	--	1	p1	(T)10	10	3704	3713	GGTCGGATCGGATGAATACT	58.815	20	TGATCCAGTGTGCTGTTTCC	59.682	20	232	3596	3827	ATAAACGGTCGGATCGGATG	61.967	20
c68614.graph_c0	17.88	20.31	18.24	21.87	16.97	19.56	18.92	17.44	17.62	18.7567	1.49187	0.079538	-0.101657	0.101657	-0.144393	0.144393	-0.0308588	0.0308588	[G]	Carbohydrate transport and metabolism	Biological Process: metabolic process (GO:0008152);; Molecular Function: 2-dehydro-3-deoxy-phosphogluconate aldolase activity (GO:0008675);;	--	--	--	KDPG and KHG aldolase	--	S	Function unknown	PREDICTED: uncharacterized protein LOC103946190 isoform X3 [Pyrus x bretschneideri]	biological process: metabolic process (GO:0008152);; molecular function: catalytic activity (GO:0003824)	--	2	p1	(T)11	11	245	255	TTTCCTGCAATCGATTTTCC	60.016	20	TGCGTATACAGAGACACACACAA	59.328	23	217	134	350	TCAAATTCCTTTGTCTCCCG	60.044	20
c71266.graph_c1	30.65	37.07	41.14	34.32	38.03	36.83	37.74	34.8	38.89	36.6078	2.85413	0.077965	0.071012	0.071012	0.144018	0.144018	0.0827002	0.0827002	--	--	--	--	--	--	--	--	--	--	unnamed protein product [Coffea canephora]	--	--	--	--	--	--	--	--	--	--	--	--	--	--	--	--	--	--	--	--
c66052.graph_c2	92.19	64.76	77.3	85.11	73.75	78.49	86.88	70.38	73.97	78.0922	8.15871	0.104475	0.0683631	0.0683631	0.143988	0.143988	0.0849333	0.0849333	--	--	Biological Process: intracellular transport (GO:0046907);;	K15306|7.61274e-88|vvi:100257001|ran-binding protein 1 homolog b-like; K15306 Ran-binding protein 1 (A)	[U]	Intracellular trafficking, secretion, and vesicular transport	RanBP1 domain	Ran-binding protein 1 homolog c GN=MZN1.4 OS=Arabidopsis thaliana (Mouse-ear cress) PE=2 SV=1	U	Intracellular trafficking, secretion, and vesicular transport	PREDICTED: ran-binding protein 1 homolog b-like [Vitis vinifera]	biological process: localization (GO:0051179)	--	--	--	--	--	--	--	--	--	--	--	--	--	--	--	--	--	--	--
c71774.graph_c0	24.74	18.1	17.9	23.98	19.96	20.4	18.57	20.77	22.33	20.75	2.34506	0.113015	0.162165	0.162165	0.14397	0.14397	-0.00762877	0.00762877	--	--	--	--	--	--	--	--	--	--	--	--	--	1	p1	(T)11	11	2093	2103	ACTCTTGGGTCCATCACTGG	59.962	20	TGTTACTTGCAGAAGCAAACAT	57.656	22	228	2039	2266	CTCTTGGGTCCATCACTGGT	59.962	20
c64306.graph_c0	48.89	65.49	55.97	46.38	53.03	45.87	50.06	51.51	40.07	50.8078	6.75912	0.133033	-0.178683	0.178683	-0.143439	0.143439	0.0452735	0.0452735	[J]	Translation, ribosomal structure and biogenesis	--	K04567|0|vvi:100262532|lysine--tRNA ligase-like; K04567 lysyl-tRNA synthetase, class II [EC:6.1.1.6] (A)	[J]	Translation, ribosomal structure and biogenesis	tRNA synthetases class II (D, K and N);; OB-fold nucleic acid binding domain;; tRNA synthetases class II core domain (F)	Lysine--tRNA ligase GN=At3g11710 OS=Arabidopsis thaliana (Mouse-ear cress) PE=1 SV=1	J	Translation, ribosomal structure and biogenesis	hypothetical protein F383_05843 [Gossypium arboreum]	--	Aminoacyl-tRNA biosynthesis (ko00970)	--	--	--	--	--	--	--	--	--	--	--	--	--	--	--	--	--	--
c65241.graph_c0	21.24	23.78	26.53	21.82	27.02	24.86	20.83	20.67	18.96	22.8567	2.65526	0.11617	0.0378393	0.0378393	-0.143045	0.143045	-0.171867	0.171867	--	--	--	--	[R]	General function prediction only	--	Vacuole membrane protein KMS1 {ECO:0000303|PubMed:21294794} OS=Arabidopsis thaliana (Mouse-ear cress) PE=1 SV=1	S	Function unknown	PREDICTED: LOW QUALITY PROTEIN: vacuole membrane protein 1-like [Citrus sinensis]	--	--	2	p1	(A)16	16	591	606	TGGGACTTTGATGCAGAGAA	59.369	20	TTGTTTGGCTTATGCTCGTG	59.872	20	268	500	767	TGGGACTTTGATGCAGAGAA	59.369	20
c71499.graph_c1	64.49	81.69	83.13	79.89	78.6	74.44	72.44	76.5	77.43	76.5122	5.29807	0.0692448	0.108547	0.108547	0.142509	0.142509	0.0444883	0.0444883	--	--	--	K17964|0|vvi:100242657|uncharacterized LOC100242657; K17964 leucine-rich PPR motif-containing protein, mitochondrial (A)	[R]	General function prediction only	PPR repeat family;; PPR repeat;; PPR repeat;; Pentatricopeptide repeat domain;; Mitochondrial 28S ribosomal protein S27	Pentatricopeptide repeat-containing protein At5g55840 GN=At5g55840 OS=Arabidopsis thaliana (Mouse-ear cress) PE=3 SV=2	R	General function prediction only	hypothetical protein VITISV_002797 [Vitis vinifera]	--	--	1	c	(A)11taaaaactttggagacctatttcattcacaaatatcatatttgattcacgaatatcatacgaatttcaaaacttgggttcagcagctagaagggtactg(T)11	121	2882	3002	ATGCCCATGACTTGGTTTGT	60.24	20	CCTAAACTGCTTTGCCTCACA	60.426	21	237	2795	3031	GCCCATGACTTGGTTTGTTC	60.362	20
c64849.graph_c2	82.41	83.04	94.56	84.68	98.07	101.82	89.46	88.85	88.76	90.1833	6.34938	0.0704053	0.160843	0.160843	0.141515	0.141515	-0.0100604	0.0100604	[LKJ]	--	Molecular Function: translation initiation factor activity (GO:0003743);; Molecular Function: ATP binding (GO:0005524);; Biological Process: translational initiation (GO:0006413);; Molecular Function: ATP-dependent helicase activity (GO:0008026);;	K13025|4.38601e-73|vvi:100255368|eukaryotic initiation factor 4A-3; K13025 ATP-dependent RNA helicase [EC:3.6.4.13] (A)	[J]	Translation, ribosomal structure and biogenesis	Helicase conserved C-terminal domain	Eukaryotic initiation factor 4A-3 OS=Nicotiana plumbaginifolia (Leadwort-leaved tobacco) PE=2 SV=1	A	RNA processing and modification	DEAD box RNA helicase RH2a [Hevea brasiliensis]	biological process: metabolic process (GO:0008152);; biological process: cellular process (GO:0009987);; molecular function: binding (GO:0005488);; biological process: single-organism process (GO:0044699);; molecular function: catalytic activity (GO:0003824)	RNA transport (ko03013);; mRNA surveillance pathway (ko03015);; Spliceosome (ko03040)	1	p1	(A)12	12	27	38	--	--	--	--	--	--	--	--	--	--	--	--
c67626.graph_c0	15.06	15.05	14.99	14.35	13.87	10.42	14.43	12.64	11.19	13.5556	1.64367	0.121254	-0.185771	0.185771	-0.141508	0.141508	0.0535959	0.0535959	[L]	Replication, recombination and repair	Molecular Function: nucleic acid binding (GO:0003676);; Molecular Function: exonuclease activity (GO:0004527);; Cellular Component: intracellular (GO:0005622);; Biological Process: nucleotide biosynthetic process (GO:0009165);;	K18327|5.80267e-93|tcc:TCM_031662|Polynucleotidyl transferase isoform 2; K18327 RNA exonuclease 4 [EC:3.1.-.-] (A)	[L]	Replication, recombination and repair	Exonuclease	Small RNA degrading nuclease 1 GN=SDN1 OS=Arabidopsis thaliana (Mouse-ear cress) PE=2 SV=1	L	Replication, recombination and repair	Polynucleotidyl transferase, ribonuclease H-like superfamily protein isoform 1 [Theobroma cacao]	molecular function: binding (GO:0005488);; biological process: metabolic process (GO:0008152);; biological process: cellular process (GO:0009987);; molecular function: catalytic activity (GO:0003824);; cellular component: cell (GO:0005623);; cellular component: cell part (GO:0044464);; biological process: single-organism process (GO:0044699)	--	2	p1	(T)16	16	2007	2022	ATCGGAAATTCAGAACGCAT	59.533	20	TTTACAAAAGGGCGGAGTTG	60.103	20	240	1973	2212	AATCGGAAATTCAGAACGCA	60.585	20
c59940.graph_c0	244.23	210.3	263.14	193.37	211.31	209.84	190.76	212.63	206.66	215.804	22.0075	0.101979	-0.193678	0.193678	-0.141487	0.141487	0.0613686	0.0613686	[O]	Posttranslational modification, protein turnover, chaperones	Biological Process: ubiquitin-dependent protein catabolic process (GO:0006511);;	K03094|1.02667e-48|pop:POPTR_0005s26450g|POPTRDRAFT_818827; hypothetical protein; K03094 S-phase kinase-associated protein 1 (A)	[O]	Posttranslational modification, protein turnover, chaperones	Skp1 family, tetramerisation domain;; Skp1 family, dimerisation domain;; Skp1 family, dimerisation domain	SKP1-like protein 1A GN=T4O12.17 OS=Arabidopsis thaliana (Mouse-ear cress) PE=1 SV=1	O	Posttranslational modification, protein turnover, chaperones	hypothetical protein POPTR_0005s26450g [Populus trichocarpa]	biological process: metabolic process (GO:0008152);; biological process: cellular process (GO:0009987)	Ubiquitin mediated proteolysis (ko04120);; Protein processing in endoplasmic reticulum (ko04141)	1	p1	(T)10	10	167	176	CGAAGCTCGGAATCCTACTG	59.971	20	TTGGTCGATTTTTGAAGCCT	59.685	20	243	47	289	CGAAGCTCGGAATCCTACTG	59.971	20
c71202.graph_c0	48.32	50.42	39	47.44	56.7	50.46	46.16	47.27	51.98	48.6389	4.53504	0.093239	0.130244	0.130244	0.141285	0.141285	0.0208618	0.0208618	--	--	--	K17925|0|pmum:103327935|uncharacterized LOC103327935; K17925 sorting nexin-13 (A)	[ZUD]	--	PXA domain;; PX domain	--	Z	Cytoskeleton	PREDICTED: uncharacterized protein LOC100243006 [Vitis vinifera]	--	--	--	--	--	--	--	--	--	--	--	--	--	--	--	--	--	--	--	--
c66096.graph_c3	17.53	16.57	16.45	17.13	13.31	16.53	17.59	14.83	11.84	15.7533	1.89494	0.120288	-0.164162	0.164162	-0.140972	0.140972	0.0341642	0.0341642	--	--	Cellular Component: plasma membrane (GO:0005886);;	--	[TO]	--	--	Putative ribonuclease H protein At1g65750 GN=At1g65750 OS=Arabidopsis thaliana (Mouse-ear cress) PE=3 SV=1	T	Signal transduction mechanisms	PREDICTED: OTU domain-containing protein DDB_G0284757-like [Populus euphratica]	cellular component: cell (GO:0005623);; cellular component: membrane (GO:0016020);; cellular component: cell part (GO:0044464)	--	2	p2	(AC)6	12	2295	2306	CCTTCACCGGTCTAAAATGC	59.569	20	TATTAAGGCCGGGACAAGTG	59.953	20	133	2222	2354	CCTTCACCGGTCTAAAATGC	59.569	20
c67093.graph_c2	108.78	98.37	100.17	80.17	96.18	92.84	90.99	81.6	84.94	92.6711	8.83171	0.0953016	-0.147481	0.147481	-0.140697	0.140697	0.0154886	0.0154886	--	--	Biological Process: intracellular protein transport (GO:0006886);;	K15296|1.50617e-126|gmx:100812517|alpha-soluble NSF attachment protein 2-like; K15296 alpha-soluble NSF attachment protein (A)	[U]	Intracellular trafficking, secretion, and vesicular transport	Soluble NSF attachment protein, SNAP;; Tetratricopeptide repeat;; Soluble NSF attachment protein, SNAP	Alpha-soluble NSF attachment protein 2 GN=F18O21_150 OS=Arabidopsis thaliana (Mouse-ear cress) PE=1 SV=1	U	Intracellular trafficking, secretion, and vesicular transport	PREDICTED: alpha-soluble NSF attachment protein 2-like [Glycine max]	biological process: localization (GO:0051179)	--	--	--	--	--	--	--	--	--	--	--	--	--	--	--	--	--	--	--
c65956.graph_c2	15.68	13.7	10.86	12.99	13.19	11.89	10.12	11.07	10.41	12.2122	1.72119	0.14094	0.0197934	0.0197934	-0.14062	0.14062	-0.150265	0.150265	[J]	Translation, ribosomal structure and biogenesis	Molecular Function: ATP binding (GO:0005524);; Cellular Component: mitochondrion (GO:0005739);; Biological Process: phosphatidylglycerol biosynthetic process (GO:0006655);; Cellular Component: chloroplast stroma (GO:0009570);; Molecular Function: transferase activity (GO:0016740);; Cellular Component: glutamyl-tRNA(Gln) amidotransferase complex (GO:0030956);; Biological Process: mitochondrial tra…	K02433|0|pper:PRUPE_ppa003764mg|hypothetical protein; K02433 aspartyl-tRNA(Asn)/glutamyl-tRNA(Gln) amidotransferase subunit A [EC:6.3.5.6 6.3.5.7] (A)	[J]	Translation, ribosomal structure and biogenesis	Amidase	Glutamyl-tRNA(Gln) amidotransferase subunit A, chloroplastic/mitochondrial {ECO:0000255|HAMAP-Rule:MF_03150} (Precursor) GN=VIT_12s0028g01330 OS=Vitis vinifera (Grape) PE=3 SV=1	J	Translation, ribosomal structure and biogenesis	hypothetical protein PRUPE_ppa003764mg [Prunus persica]	molecular function: binding (GO:0005488);; cellular component: cell (GO:0005623);; cellular component: organelle (GO:0043226);; cellular component: cell part (GO:0044464);; biological process: metabolic process (GO:0008152);; biological process: cellular process (GO:0009987);; biological process: single-organism process (GO:0044699);; cellular component: organelle part (GO:0044422);; molecular fu…	Aminoacyl-tRNA biosynthesis (ko00970)	--	--	--	--	--	--	--	--	--	--	--	--	--	--	--	--	--	--
c68982.graph_c0	7.59	9.06	8.41	8.44	8.7	9.08	8.03	9.65	7.98	8.54889	0.607553	0.0710681	0.0944408	0.0944408	0.140261	0.140261	0.0565888	0.0565888	--	--	--	--	[R]	General function prediction only	Galactose oxidase, central domain;; Galactose oxidase, central domain;; Kelch motif;; Kelch motif;; Kelch motif;; Kelch motif	Acyl-CoA-binding domain-containing protein 4 GN=ACBP4 OS=Arabidopsis thaliana (Mouse-ear cress) PE=1 SV=1	R	General function prediction only	hypothetical protein PRUPE_ppa002997mg [Prunus persica]	--	--	2	p1	(A)11	11	2621	2631	ATCTGCATGGCTTGTCATTG	59.679	20	TGTTGCTGTGTTCTTCGGTC	59.88	20	197	2537	2733	ATCTGCATGGCTTGTCATTG	59.679	20
c16932.graph_c0	69.69	82.21	96.19	73.27	102.72	89.59	79.94	85.68	88.5	85.31	9.87425	0.115745	0.1355	0.1355	0.140131	0.140131	0.013171	0.013171	[R]	General function prediction only	Molecular Function: GTPase activity (GO:0003924);; Molecular Function: protein binding (GO:0005515);; Molecular Function: GTP binding (GO:0005525);; Cellular Component: early endosome (GO:0005769);; Cellular Component: Golgi apparatus (GO:0005794);; Biological Process: GTP catabolic process (GO:0006184);; Biological Process: protein targeting to vacuole (GO:0006623);; Biological Process: membrane…	K07889|3.81041e-125|pxb:103941770|ras-related protein RABF1; K07889 Ras-related protein Rab-5C (A)	[U]	Intracellular trafficking, secretion, and vesicular transport	Ras family;; Miro-like protein;; ADP-ribosylation factor family;; Gtr1/RagA G protein conserved region	Ras-related protein RABF1 GN=F28P10.180 OS=Arabidopsis thaliana (Mouse-ear cress) PE=1 SV=1	U	Intracellular trafficking, secretion, and vesicular transport	PREDICTED: ras-related protein RABF1 [Malus domestica]	biological process: metabolic process (GO:0008152);; biological process: cellular process (GO:0009987);; biological process: single-organism process (GO:0044699);; molecular function: catalytic activity (GO:0003824);; molecular function: binding (GO:0005488);; cellular component: cell (GO:0005623);; cellular component: organelle (GO:0043226);; cellular component: cell part (GO:0044464);; biologic…	Endocytosis (ko04144);; Phagosome (ko04145)	1	p2	(CG)7	14	104	117	TAAACGCCCAAATTCACACA	59.969	20	AGCTTGACACGCAGGTTTTT	59.92	20	162	79	240	TAAACGCCCAAATTCACACA	59.969	20
c64533.graph_c0	24.53	19.8	20.87	25.24	24.9	22.28	26.36	21.93	24.53	23.3822	2.10091	0.0898507	0.175229	0.175229	0.139583	0.139583	-0.0269414	0.0269414	--	--	--	K18213|0|pmum:103340978|proteinaceous RNase P 1, chloroplastic/mitochondrial-like; K18213 proteinaceous RNase P [EC:3.1.26.5] (A)	[R]	General function prediction only	PPR repeat family	Proteinaceous RNase P 1, chloroplastic/mitochondrial (Precursor) GN=PRORP1 OS=Arabidopsis thaliana (Mouse-ear cress) PE=1 SV=1	S	Function unknown	PREDICTED: proteinaceous RNase P 1, chloroplastic/mitochondrial-like [Prunus mume]	--	RNA transport (ko03013)	--	--	--	--	--	--	--	--	--	--	--	--	--	--	--	--	--	--
c68693.graph_c0	24.35	19.1	18.96	23.67	20.88	19.35	22.52	23.89	20.94	21.5178	2.03069	0.0943725	0.033843	0.033843	0.139419	0.139419	0.115615	0.115615	[H]	Coenzyme transport and metabolism	Molecular Function: FMN adenylyltransferase activity (GO:0003919);; Molecular Function: methyltransferase activity (GO:0008168);; Biological Process: riboflavin biosynthetic process (GO:0009231);; Biological Process: methylation (GO:0032259);;	--	--	--	FAD synthetase	FAD synthetase 1, chloroplastic (Precursor) GN=RIBF1 OS=Arabidopsis thaliana (Mouse-ear cress) PE=1 SV=1	S	Function unknown	hypothetical protein JCGZ_24481 [Jatropha curcas]	biological process: metabolic process (GO:0008152);; molecular function: catalytic activity (GO:0003824);; biological process: cellular process (GO:0009987);; biological process: single-organism process (GO:0044699)	--	1	p1	(A)10	10	1888	1897	CGCACCTCCACGTTTAGTTT	60.168	20	TGGTTGGGAGCCTAGGTATG	59.948	20	261	1697	1957	CATCAAAAGCACAAACGCAC	60.302	20
c69669.graph_c0	55.52	57.8	55.79	51.58	69.02	61.48	56.63	56.09	58.26	58.0189	4.61195	0.0794906	0.126889	0.126889	0.13925	0.13925	0.0212964	0.0212964	[U]	Intracellular trafficking, secretion, and vesicular transport	Biological Process: intracellular protein transport (GO:0006886);; Biological Process: ER to Golgi vesicle-mediated transport (GO:0006888);; Molecular Function: zinc ion binding (GO:0008270);; Cellular Component: COPII vesicle coat (GO:0030127);;	K14007|0|vvi:100265768|protein transport protein Sec24-like At4g32640; K14007 protein transport protein SEC24 (A)	[U]	Intracellular trafficking, secretion, and vesicular transport	Sec23/Sec24 trunk domain;; Sec23/Sec24 beta-sandwich domain;; Sec23/Sec24 helical domain;; Sec23/Sec24 zinc finger;; Gelsolin repeat	Protein transport protein Sec24-like CEF GN=CEF OS=Arabidopsis thaliana (Mouse-ear cress) PE=2 SV=3	U	Intracellular trafficking, secretion, and vesicular transport	PREDICTED: protein transport protein Sec24-like At4g32640 [Vitis vinifera]	biological process: localization (GO:0051179);; biological process: single-organism process (GO:0044699);; molecular function: binding (GO:0005488);; cellular component: cell (GO:0005623);; cellular component: membrane (GO:0016020);; cellular component: macromolecular complex (GO:0032991);; cellular component: organelle (GO:0043226);; cellular component: organelle part (GO:0044422);; cellular com…	Protein processing in endoplasmic reticulum (ko04141)	4	p1	(A)16	16	4721	4736	--	--	--	--	--	--	--	--	--	--	--	--
c66095.graph_c0	28.97	31.06	27.69	26.54	29.32	24.25	27.96	29.01	23.06	27.54	2.40042	0.0871611	-0.0928304	0.0928304	-0.139099	0.139099	-0.0370244	0.0370244	--	--	Cellular Component: exocyst (GO:0000145);; Biological Process: exocytosis (GO:0006887);;	K07195|0|tcc:TCM_042985|Exocyst subunit exo70 family protein H2; K07195 exocyst complex component 7 (A)	[U]	Intracellular trafficking, secretion, and vesicular transport	Exo70 exocyst complex subunit	Exocyst complex component EXO70A1 GN=EXO70A1 OS=Arabidopsis thaliana (Mouse-ear cress) PE=1 SV=1	U	Intracellular trafficking, secretion, and vesicular transport	Exocyst subunit exo70 family protein H2 [Theobroma cacao]	cellular component: cell (GO:0005623);; cellular component: macromolecular complex (GO:0032991);; cellular component: cell part (GO:0044464);; biological process: cellular process (GO:0009987);; biological process: single-organism process (GO:0044699);; biological process: localization (GO:0051179)	--	1	p1	(A)10	10	3501	3510	AACCATGTGATGGAAAGCAA	58.976	20	TGCAAGGTTAGAGTCCCAGG	60.246	20	206	3348	3553	ACCATGTGATGGAAAGCAAA	58.976	20
c69074.graph_c0	38.84	40.26	33	36.98	42.5	40.5	36.46	43.78	37.41	38.8589	3.12414	0.0803972	0.0942912	0.0942912	0.13904	0.13904	0.0548079	0.0548079	[C]	Energy production and conversion	Molecular Function: iron ion binding (GO:0005506);; Cellular Component: mitochondrial respiratory chain complex III (GO:0005750);; Cellular Component: vacuole (GO:0005773);; Cellular Component: plasma membrane (GO:0005886);; Biological Process: mitochondrial electron transport, ubiquinol to cytochrome c (GO:0006122);; Cellular Component: plastid (GO:0009536);; Molecular Function: heme binding (GO…	K00413|8.88595e-127|mus:103981335|cytochrome c1-2, heme protein, mitochondrial; K00413 ubiquinol-cytochrome c reductase cytochrome c1 subunit (A)	[C]	Energy production and conversion	Cytochrome C1 family	Cytochrome c1-1, heme protein, mitochondrial (Precursor) GN=CYCL OS=Solanum tuberosum (Potato) PE=2 SV=1	C	Energy production and conversion	unnamed protein product [Coffea canephora]	molecular function: binding (GO:0005488);; cellular component: cell (GO:0005623);; cellular component: membrane (GO:0016020);; cellular component: macromolecular complex (GO:0032991);; cellular component: organelle (GO:0043226);; cellular component: organelle part (GO:0044422);; cellular component: membrane part (GO:0044425);; cellular component: cell part (GO:0044464);; biological process: metab…	Oxidative phosphorylation (ko00190)	2	p3	(CCA)5	15	1459	1473	CATTCTCCTCCAGCCATCTC	59.761	20	TTTTGAGTGGGTCCCAGAAG	60.081	20	233	1431	1663	CATTCTCCTCCAGCCATCTC	59.761	20
c73507.graph_c0	19.73	24.22	25.27	26.17	24.77	26	29.08	22.16	21.2	24.2889	2.69726	0.111049	0.19675	0.19675	0.138986	0.138986	-0.0477161	0.0477161	--	--	--	--	--	--	Protein of unknown function (DUF1664)	--	S	Function unknown	PREDICTED: uncharacterized protein LOC104897533 isoform X2 [Beta vulgaris subsp. vulgaris]	--	--	--	--	--	--	--	--	--	--	--	--	--	--	--	--	--	--	--	--
c63030.graph_c0	23.3	20.12	22.75	20.15	20.02	17.1	18.95	18.22	18.25	19.8733	1.94619	0.0979296	-0.164467	0.164467	-0.138866	0.138866	0.034751	0.034751	[C]	Energy production and conversion	Biological Process: malate metabolic process (GO:0006108);; Molecular Function: L-malate dehydrogenase activity (GO:0030060);; Biological Process: cellular carbohydrate metabolic process (GO:0044262);; Biological Process: oxidation-reduction process (GO:0055114);;	K00026|0|tcc:TCM_014018|Malate dehydrogenase; K00026 malate dehydrogenase [EC:1.1.1.37] (A)	[C]	Energy production and conversion	lactate/malate dehydrogenase, NAD binding domain;; lactate/malate dehydrogenase, alpha/beta C-terminal domain;; 3-beta hydroxysteroid dehydrogenase/isomerase family	Malate dehydrogenase, chloroplastic (Precursor) GN=At3g47520 OS=Arabidopsis thaliana (Mouse-ear cress) PE=1 SV=1	C	Energy production and conversion	Malate dehydrogenase [Theobroma cacao]	biological process: metabolic process (GO:0008152);; biological process: cellular process (GO:0009987);; biological process: single-organism process (GO:0044699);; molecular function: catalytic activity (GO:0003824)	Citrate cycle (TCA cycle) (ko00020);; Cysteine and methionine metabolism (ko00270);; Pyruvate metabolism (ko00620);; Glyoxylate and dicarboxylate metabolism (ko00630);; Carbon fixation in photosynthetic organisms (ko00710);; Carbon metabolism (ko01200)	--	--	--	--	--	--	--	--	--	--	--	--	--	--	--	--	--	--
c69934.graph_c2	9.24	12.43	7.03	9.51	10.61	9.07	9.47	7.5	7.22	9.12	1.63538	0.179318	0.0609886	0.0609886	-0.138854	0.138854	-0.189434	0.189434	[K]	Transcription	Molecular Function: double-stranded telomeric DNA binding (GO:0003691);; Molecular Function: sequence-specific DNA binding transcription factor activity (GO:0003700);; Cellular Component: nucleus (GO:0005634);; Biological Process: regulation of transcription, DNA-templated (GO:0006355);; Biological Process: transcription initiation from RNA polymerase II promoter (GO:0006367);; Biological Process…	K03120|9.9488e-41|brp:103829778|TATA-box-binding protein 2; K03120 transcription initiation factor TFIID TATA-box-binding protein (A)	[K]	Transcription	Transcription factor TFIID (or TATA-binding protein, TBP)	TATA-box-binding protein 2 GN=TBP2 OS=Arabidopsis thaliana (Mouse-ear cress) PE=1 SV=1	K	Transcription	BnaC06g10970D [Brassica napus]	molecular function: binding (GO:0005488);; biological process: biological regulation (GO:0065007);; molecular function: nucleic acid binding transcription factor activity (GO:0001071);; cellular component: cell (GO:0005623);; cellular component: organelle (GO:0043226);; cellular component: cell part (GO:0044464);; biological process: metabolic process (GO:0008152);; biological process: cellular p…	Basal transcription factors (ko03022)	--	--	--	--	--	--	--	--	--	--	--	--	--	--	--	--	--	--
c68142.graph_c5	33.73	30.19	25.81	30.71	31.36	30.33	23.87	34.9	30.08	30.1089	3.25669	0.108164	0.159596	0.159596	0.138437	0.138437	-0.0106109	0.0106109	--	--	--	--	--	--	--	--	S	Function unknown	hypothetical protein POPTR_0011s09990g [Populus trichocarpa]	--	--	1	p3	(CTT)6	18	2329	2346	AACAGAGCATTTTTGGGTGG	59.971	20	TTAACCTGCGCTTTGGAAGT	59.883	20	128	2288	2415	GCAACAGAGCATTTTTGGGT	60.118	20
c72568.graph_c2	63.07	63.33	65.65	58.1	57.6	62.8	62.7	64	61.56	62.09	2.49571	0.040195	-0.02323	0.02323	0.137873	0.137873	0.171552	0.171552	[O]	Posttranslational modification, protein turnover, chaperones	Molecular Function: ATP binding (GO:0005524);; Cellular Component: cytoplasm (GO:0005737);; Molecular Function: nucleoside-triphosphatase activity (GO:0017111);; Biological Process: protein catabolic process (GO:0030163);;	K03062|0|tcc:TCM_001497|Regulatory particle AAA-ATPase 2A isoform 1; K03062 26S proteasome regulatory subunit T2 (A)	[O]	Posttranslational modification, protein turnover, chaperones	ATPase family associated with various cellular activities (AAA);; AAA domain;; AAA domain (Cdc48 subfamily);; Protein of unknown function (DUF815);; AAA domain (dynein-related subfamily);; Serine hydroxymethyltransferase	26S proteasome regulatory subunit 4 homolog A OS=Arabidopsis thaliana (Mouse-ear cress) PE=1 SV=1	O	Posttranslational modification, protein turnover, chaperones	Regulatory particle AAA-ATPase 2A isoform 1 [Theobroma cacao]	molecular function: binding (GO:0005488);; cellular component: cell (GO:0005623);; cellular component: cell part (GO:0044464);; biological process: metabolic process (GO:0008152);; molecular function: catalytic activity (GO:0003824)	Proteasome (ko03050)	1	c	(T)10(A)10	20	3175	3194	AAGAAGAAAGAAGGGGTGCC	59.691	20	CGTACATCCCAAACAAATTCTC	58.492	22	248	3027	3274	AAGAAGAAAGAAGGGGTGCC	59.691	20
c70156.graph_c0	17.48	14.21	11.66	18.81	11.88	15.59	13.32	14.04	15.98	14.7744	2.27975	0.154303	0.170804	0.170804	0.137782	0.137782	-0.0203732	0.0203732	[J]	Translation, ribosomal structure and biogenesis	Molecular Function: translation initiation factor activity (GO:0003743);; Cellular Component: cell wall (GO:0005618);; Biological Process: translational initiation (GO:0006413);; Cellular Component: chloroplast (GO:0009507);;	K02520|4.00434e-53|rcu:RCOM_0443750|translation initiation factor if-3, putative; K02520 translation initiation factor IF-3 (A)	--	--	Translation initiation factor IF-3, C-terminal domain	Translation initiation factor IF-3, chloroplastic {ECO:0000255|HAMAP-Rule:MF_00080} OS=Cyanidioschyzon merolae (Red alga) PE=3 SV=1	J	Translation, ribosomal structure and biogenesis	translation initiation factor if-3, putative [Ricinus communis]	biological process: metabolic process (GO:0008152);; biological process: cellular process (GO:0009987);; molecular function: binding (GO:0005488);; cellular component: cell (GO:0005623);; cellular component: cell part (GO:0044464);; cellular component: organelle (GO:0043226)	--	1	p2	(AT)7	14	996	1009	GATAGGAACCCAAATGCCAA	59.762	20	CTCGGGATTGGTTGAGTCAT	59.927	20	183	869	1051	TTGATAGGAACCCAAATGCC	59.762	20
c47590.graph_c0	11.5	10.22	11.1	10.8	11.07	13.02	11.9	8.29	9.28	10.7978	1.32238	0.122468	0.0303925	0.0303925	-0.137584	0.137584	-0.159209	0.159209	[G]	Carbohydrate transport and metabolism	Biological Process: histidine biosynthetic process (GO:0000105);; Molecular Function: histidinol-phosphatase activity (GO:0004401);; Biological Process: sulfur compound metabolic process (GO:0006790);; Molecular Function: 3'(2'),5'-bisphosphate nucleotidase activity (GO:0008441);; Molecular Function: inositol monophosphate 1-phosphatase activity (GO:0008934);; Cellular Component: chloroplast (GO:…	K18649|7.20659e-48|vvi:100260677|bifunctional phosphatase IMPL2, chloroplastic; K18649 inositol-phosphate phosphatase / L-galactose 1-phosphate phosphatase / histidinol-phosphatase [EC:3.1.3.25 3.1.3.93 3.1.3.15] (A)	[G]	Carbohydrate transport and metabolism	Inositol monophosphatase family	Bifunctional phosphatase IMPL2, chloroplastic (Precursor) GN=T22F8.20 OS=Arabidopsis thaliana (Mouse-ear cress) PE=1 SV=1	G	Carbohydrate transport and metabolism	hypothetical protein CISIN_1g022121mg [Citrus sinensis]	biological process: metabolic process (GO:0008152);; biological process: cellular process (GO:0009987);; biological process: single-organism process (GO:0044699);; molecular function: catalytic activity (GO:0003824);; cellular component: cell (GO:0005623);; cellular component: organelle (GO:0043226);; cellular component: cell part (GO:0044464)	Ascorbate and aldarate metabolism (ko00053);; Histidine metabolism (ko00340);; Inositol phosphate metabolism (ko00562);; Biosynthesis of amino acids (ko01230);; Phosphatidylinositol signaling system (ko04070)	2	p1	(T)11	11	1927	1937	TGAATGTGTGGGTGGAGAGA	60.088	20	GCACATGGAAGGAAAAATGG	60.309	20	256	1705	1960	TGAATGTGTGGGTGGAGAGA	60.088	20
c72355.graph_c1	23.09	24.3	22.94	17.87	20.62	21.54	27.12	14.45	18.07	21.1111	3.62224	0.17158	-0.172712	0.172712	-0.137578	0.137578	0.0435556	0.0435556	--	--	--	--	--	--	--	--	--	--	--	--	--	1	p1	(T)10	10	496	505	AGATACGCATCCGATATGGC	59.914	20	CTGGGCCTTCCTTTTGTTTT	60.455	20	248	439	686	AGATACGCATCCGATATGGC	59.914	20
c72163.graph_c0	32.94	36.69	35.87	35.74	38.97	34.54	42.21	35.39	32.84	36.1322	2.78171	0.0769869	0.0730074	0.0730074	0.137038	0.137038	0.073299	0.073299	[RTKL]	--	Molecular Function: nucleotide binding (GO:0000166);; Molecular Function: protein kinase activity (GO:0004672);; Biological Process: cellular process (GO:0009987);;	--	[S]	Function unknown	Protein kinase domain;; Protein tyrosine kinase;; D-mannose binding lectin;; S-locus glycoprotein family;; PAN domain;; PAN-like domain;; Histone deacetylation protein Rxt3	Putative receptor protein kinase ZmPK1 (Precursor) GN=PK1 OS=Zea mays (Maize) PE=2 SV=2	T	Signal transduction mechanisms	Receptor protein kinase 4 [Theobroma cacao]	molecular function: binding (GO:0005488);; biological process: metabolic process (GO:0008152);; biological process: cellular process (GO:0009987);; molecular function: catalytic activity (GO:0003824)	--	--	--	--	--	--	--	--	--	--	--	--	--	--	--	--	--	--	--
c70781.graph_c0	45.55	50.56	46.06	42.62	47.2	49.38	45.71	38.35	40.22	45.0722	3.7941	0.0841782	-0.0086696	0.0086696	-0.136317	0.136317	-0.117563	0.117563	--	--	Molecular Function: ubiquitin thiolesterase activity (GO:0004221);; Cellular Component: intracellular (GO:0005622);; Biological Process: ubiquitin-dependent protein catabolic process (GO:0006511);; Molecular Function: omega peptidase activity (GO:0008242);;	K05610|3.90935e-169|vvi:100251772|ubiquitin carboxyl-terminal hydrolase isozyme L5-like; K05610 ubiquitin carboxyl-terminal hydrolase L5 [EC:3.4.19.12] (A)	[O]	Posttranslational modification, protein turnover, chaperones	Ubiquitin carboxyl-terminal hydrolase, family 1	--	O	Posttranslational modification, protein turnover, chaperones	PREDICTED: ubiquitin carboxyl-terminal hydrolase isozyme L5 [Vitis vinifera]	biological process: metabolic process (GO:0008152);; molecular function: catalytic activity (GO:0003824);; cellular component: cell (GO:0005623);; cellular component: cell part (GO:0044464);; biological process: cellular process (GO:0009987)	--	1	p1	(A)10	10	1279	1288	CCAACCTCCTTCCAAAGTGA	60.081	20	GAGGGCTTGAGATCCACTTG	59.803	20	147	1171	1317	CCAACCTCCTTCCAAAGTGA	60.081	20
c65709.graph_c0	117.25	127.41	139.85	111.61	125.9	122.84	109.46	112.91	98.67	118.433	11.3725	0.0960243	-0.0392408	0.0392408	-0.136124	0.136124	-0.0873922	0.0873922	[O]	Posttranslational modification, protein turnover, chaperones	Molecular Function: ATP binding (GO:0005524);; Cellular Component: cell wall (GO:0005618);; Cellular Component: nucleus (GO:0005634);; Cellular Component: cytosol (GO:0005829);; Biological Process: gluconeogenesis (GO:0006094);; Biological Process: ATP catabolic process (GO:0006200);; Biological Process: fatty acid beta-oxidation (GO:0006635);; Biological Process: ER to Golgi vesicle-mediated tra…	K03063|0|cmo:103496251|26S protease regulatory subunit 6B homolog; K03063 26S proteasome regulatory subunit T3 (A)	[O]	Posttranslational modification, protein turnover, chaperones	ATPase family associated with various cellular activities (AAA);; AAA domain (dynein-related subfamily);; AAA domain (Cdc48 subfamily);; AAA domain;; AAA ATPase domain;; Protein of unknown function (DUF815);; Holliday junction DNA helicase ruvB N-terminus	26S protease regulatory subunit 6B homolog GN=MCK7.16 OS=Arabidopsis thaliana (Mouse-ear cress) PE=1 SV=1	O	Posttranslational modification, protein turnover, chaperones	PREDICTED: 26S protease regulatory subunit 6B homolog [Cucumis melo]	molecular function: binding (GO:0005488);; cellular component: cell (GO:0005623);; cellular component: cell part (GO:0044464);; cellular component: organelle (GO:0043226);; biological process: metabolic process (GO:0008152);; biological process: single-organism process (GO:0044699);; biological process: cellular process (GO:0009987);; biological process: localization (GO:0051179);; biological pro…	Proteasome (ko03050)	--	--	--	--	--	--	--	--	--	--	--	--	--	--	--	--	--	--
c60866.graph_c0	10.24	10.73	12.52	10.92	11.64	10.81	13.32	10.42	10.34	11.2156	1.00826	0.089898	0.0357713	0.0357713	0.13564	0.13564	0.108643	0.108643	--	--	Biological Process: macromolecule metabolic process (GO:0043170);;	--	--	--	--	--	S	Function unknown	Modifier of snc1, putative isoform 1 [Theobroma cacao]	biological process: metabolic process (GO:0008152)	--	1	p1	(T)11	11	10	20	--	--	--	--	--	--	--	--	--	--	--	--
c62384.graph_c3	10.62	9.08	7.67	6.89	8.78	8.96	8.75	7.49	6.75	8.33222	1.16874	0.140267	-0.104014	0.104014	-0.135402	0.135402	-0.0226459	0.0226459	--	--	--	--	[S]	Function unknown	Protein of unknown function (DUF3657)	--	S	Function unknown	PREDICTED: protein FAM135B-like isoform X6 [Malus domestica]	--	--	1	c	(GA)6gc(T)16	30	529	558	ATATGCATTGGAATTTCGCC	59.763	20	CCAATAAACCATCCCAAACG	60.046	20	245	439	683	ATATGCATTGGAATTTCGCC	59.763	20
c66104.graph_c0	8.76	6.53	6.68	6.04	7.97	6.42	8.07	8.02	5.92	7.15667	0.986047	0.13778	-0.0224192	0.0224192	0.135379	0.135379	0.165188	0.165188	--	--	--	--	--	--	--	--	--	--	--	--	--	2	p1	(A)11	11	1603	1613	GACTAACTATCCGGGAGGGG	59.783	20	GAAGGTCCTGCAATGCTACC	59.7	20	164	1555	1718	GACTAACTATCCGGGAGGGG	59.783	20
c69215.graph_c0	60.5	52.78	37.96	44.47	48.77	42.9	40.78	40.8	37.42	45.1533	7.16424	0.158665	-0.064358	0.064358	-0.135041	0.135041	-0.0608784	0.0608784	--	--	--	--	--	--	--	--	S	Function unknown	hypothetical protein L484_001630 [Morus notabilis]	--	--	2	p2	(TA)8	16	2570	2585	TCAGATCCTCTCCCCCTGTA	59.606	20	CCGGAAAGGAAGAATCCAAC	60.797	20	252	2396	2647	TCAGATCCTCTCCCCCTGTA	59.606	20
c68275.graph_c0	46.39	39.02	38.87	42.11	36.1	41.96	45.46	37.32	42.36	41.0656	3.31525	0.0807307	-0.0200588	0.0200588	0.13491	0.13491	0.165362	0.165362	--	--	Molecular Function: metal ion binding (GO:0046872);;	--	[R]	General function prediction only	Zinc finger C-x8-C-x5-C-x3-H type (and similar);; Zinc finger C-x8-C-x5-C-x3-H type (and similar)	Zinc finger CCCH domain-containing protein 43 GN=At3g48440 OS=Arabidopsis thaliana (Mouse-ear cress) PE=2 SV=1	R	General function prediction only	hypothetical protein CICLE_v10019979mg [Citrus clementina]	molecular function: binding (GO:0005488)	--	--	--	--	--	--	--	--	--	--	--	--	--	--	--	--	--	--	--
c70592.graph_c1	210.39	292.41	350.27	287.66	243.45	276.16	265.04	278.18	286.53	276.677	35.7726	0.129294	0.0384294	0.0384294	0.134365	0.134365	0.107162	0.107162	[J]	Translation, ribosomal structure and biogenesis	Cellular Component: nucleus (GO:0005634);;	K15304|4.50573e-139|vvi:100265296|nuclear pore complex protein NUP50A; K15304 Ran-binding protein 3 (A)	[U]	Intracellular trafficking, secretion, and vesicular transport	NUP50 (Nucleoporin 50 kDa);; RanBP1 domain	Nuclear pore complex protein NUP50A {ECO:0000303|PubMed:21189294} OS=Arabidopsis thaliana (Mouse-ear cress) PE=1 SV=1	U	Intracellular trafficking, secretion, and vesicular transport	PREDICTED: nuclear pore complex protein NUP50A [Vitis vinifera]	cellular component: cell (GO:0005623);; cellular component: organelle (GO:0043226);; cellular component: cell part (GO:0044464)	--	4	p2	(TC)7	14	4236	4249	ACGAAAATGAAGAGGCGCTA	59.982	20	TGACTGCCAAAGAAGTGTGC	60.032	20	119	4165	4283	GAGGCGCTATGACGTTTAGG	59.867	20
c70002.graph_c0	10.41	11.28	14.02	8.62	10.7	9.6	8.92	11.49	10.92	10.6622	1.5205	0.142607	-0.0421833	0.0421833	0.134341	0.134341	0.186296	0.186296	[TDBLU]	--	Molecular Function: phosphorelay sensor kinase activity (GO:0000155);; Biological Process: phosphorelay signal transduction system (GO:0000160);; Molecular Function: ATP binding (GO:0005524);; Cellular Component: membrane (GO:0016020);; Biological Process: signal transduction by phosphorylation (GO:0023014);;	K08873|0|vvi:100260579|SMG1; uncharacterized LOC100260579; K08873 PI-3-kinase-related kinase SMG-1 (A)	[L]	Replication, recombination and repair	Phosphatidylinositol 3- and 4-kinase;; Rapamycin binding domain;; FATC domain	Serine/threonine-protein kinase TOR GN=TOR OS=Arabidopsis thaliana (Mouse-ear cress) PE=1 SV=1	L	Replication, recombination and repair	PREDICTED: uncharacterized protein LOC100260579 [Vitis vinifera]	biological process: metabolic process (GO:0008152);; biological process: cellular process (GO:0009987);; biological process: signaling (GO:0023052);; biological process: single-organism process (GO:0044699);; biological process: response to stimulus (GO:0050896);; biological process: biological regulation (GO:0065007);; molecular function: catalytic activity (GO:0003824);; molecular function: rec…	mRNA surveillance pathway (ko03015)	--	--	--	--	--	--	--	--	--	--	--	--	--	--	--	--	--	--
c67092.graph_c3	14.51	10.18	8.51	12.92	12.02	11.46	9.33	10.82	11.05	11.2	1.719	0.153483	0.0731919	0.0731919	-0.13431	0.13431	-0.198104	0.198104	--	--	--	--	--	--	--	--	--	--	--	--	--	--	--	--	--	--	--	--	--	--	--	--	--	--	--	--	--	--	--
c51196.graph_c0	42.49	40.64	39.38	42.15	42.91	45.73	44.56	37.46	40.04	41.7067	2.44836	0.0587042	0.157946	0.157946	0.134242	0.134242	-0.0139171	0.0139171	[R]	General function prediction only	Molecular Function: metalloendopeptidase activity (GO:0004222);; Biological Process: proteolysis (GO:0006508);; Molecular Function: metal ion binding (GO:0046872);;	K01412|0|vvi:100259973|mitochondrial-processing peptidase subunit alpha; K01412 mitochondrial-processing peptidase subunit alpha [EC:3.4.24.64] (A)	[O]	Posttranslational modification, protein turnover, chaperones	Insulinase (Peptidase family M16);; Peptidase M16 inactive domain	Mitochondrial-processing peptidase subunit alpha (Precursor) GN=MPP OS=Solanum tuberosum (Potato) PE=1 SV=1	O	Posttranslational modification, protein turnover, chaperones	PREDICTED: mitochondrial-processing peptidase subunit alpha-like [Nelumbo nucifera]	biological process: metabolic process (GO:0008152);; molecular function: catalytic activity (GO:0003824);; molecular function: binding (GO:0005488)	--	1	p1	(A)10	10	73	82	TTCAACCCCAAACCAAAAGA	60.314	20	CCCTGGAAATTGTGTATGGG	60.044	20	168	38	205	TTCAACCCCAAACCAAAAGA	60.314	20
c52079.graph_c1	15.2	14.55	15.94	15.09	12.92	15.3	11.89	15.26	12.19	14.26	1.42431	0.0998817	-0.029565	0.029565	-0.133895	0.133895	-0.092975	0.092975	--	--	Molecular Function: ARF guanyl-nucleotide exchange factor activity (GO:0005086);; Biological Process: regulation of ARF protein signal transduction (GO:0032012);;	K18443|2.22751e-21|pvu:PHAVU_001G235300g|hypothetical protein; K18443 golgi-specific brefeldin A-resistance guanine nucleotide exchange factor 1 (A)	[U]	Intracellular trafficking, secretion, and vesicular transport	--	ARF guanine-nucleotide exchange factor GNL1 GN=MUL8.20 OS=Arabidopsis thaliana (Mouse-ear cress) PE=3 SV=1	U	Intracellular trafficking, secretion, and vesicular transport	hypothetical protein PHAVU_001G235300g [Phaseolus vulgaris]	biological process: biological regulation (GO:0065007);; molecular function: guanyl-nucleotide exchange factor activity (GO:0005085)	Endocytosis (ko04144)	--	--	--	--	--	--	--	--	--	--	--	--	--	--	--	--	--	--
c68913.graph_c0	19.7	19.95	19.4	17.77	16.35	18.4	11.88	18.74	19.61	17.9778	2.4078	0.133932	-0.138969	0.138969	-0.133636	0.133636	0.017225	0.017225	[R]	General function prediction only	--	--	[I]	Lipid transport and metabolism	Acyl CoA binding protein;; Ankyrin repeats (many copies);; Ankyrin repeats (many copies);; Ankyrin repeat;; Ankyrin repeats (3 copies);; Ankyrin repeat	Acyl-CoA-binding domain-containing protein 1 GN=MYN8.8 OS=Arabidopsis thaliana (Mouse-ear cress) PE=1 SV=2	I	Lipid transport and metabolism	hypothetical protein PRUPE_ppa007917mg [Prunus persica]	--	--	3	p2	(AG)6	12	1866	1877	--	--	--	--	--	--	--	--	--	--	--	--
c71205.graph_c1	29.07	27.86	24.05	28.36	25.18	23.31	24.37	25.5	21.99	25.5211	2.28736	0.0896261	-0.0403048	0.0403048	-0.133587	0.133587	-0.082585	0.082585	--	--	Cellular Component: integral component of membrane (GO:0016021);;	--	[R]	General function prediction only	Hypoxia induced protein conserved region	RING-H2 finger protein ATL48 GN=ATL48 OS=Arabidopsis thaliana (Mouse-ear cress) PE=1 SV=2	S	Function unknown	hypothetical protein L484_004929 [Morus notabilis]	cellular component: membrane (GO:0016020);; cellular component: membrane part (GO:0044425)	--	3	c	(TG)6gggtg(T)11	28	864	891	GATCCTCCTAGGCTGGCTCT	59.942	20	CCTCCAACAGGTTAAGCAGC	59.875	20	232	724	955	GTGGATCATGCCTGGAGAAT	59.893	20
c58262.graph_c0	16.78	16.44	16.14	17.63	12.74	16.37	13.93	12.69	14.67	15.2656	1.71264	0.11219	-0.0287045	0.0287045	-0.133374	0.133374	-0.0928553	0.0928553	--	--	Cellular Component: integral component of peroxisomal membrane (GO:0005779);; Biological Process: peroxisome organization (GO:0007031);;	K13336|0|tcc:TCM_012593|Peroxin 3 isoform 1; K13336 peroxin-3 (A)	[MU]	--	Peroxin-3	Peroxisome biogenesis protein 3-2 GN=PEX3-2 OS=Arabidopsis thaliana (Mouse-ear cress) PE=2 SV=1	U	Intracellular trafficking, secretion, and vesicular transport	Peroxin 3 isoform 1 [Theobroma cacao]	cellular component: cell (GO:0005623);; cellular component: membrane (GO:0016020);; cellular component: organelle (GO:0043226);; cellular component: organelle part (GO:0044422);; cellular component: membrane part (GO:0044425);; cellular component: cell part (GO:0044464);; biological process: cellular process (GO:0009987);; biological process: cellular component organization or biogenesis (GO:0071…	Peroxisome (ko04146)	--	--	--	--	--	--	--	--	--	--	--	--	--	--	--	--	--	--
c69031.graph_c0	12.76	15.73	18.15	12.61	17.09	17.66	15.14	16.14	16.09	15.7078	1.84474	0.117441	0.0580292	0.0580292	0.133253	0.133253	0.0844058	0.0844058	--	--	Cellular Component: nucleus (GO:0005634);; Biological Process: plant-type hypersensitive response (GO:0009626);; Biological Process: systemic acquired resistance (GO:0009627);; Biological Process: response to high light intensity (GO:0009644);; Biological Process: jasmonic acid and ethylene-dependent systemic resistance, jasmonic acid mediated signaling pathway (GO:0009868);; Biological Process: …	--	--	--	--	Protein CPR-5 GN=MXK3.16 OS=Arabidopsis thaliana (Mouse-ear cress) PE=1 SV=1	S	Function unknown	PREDICTED: protein CPR-5 [Vitis vinifera]	cellular component: cell (GO:0005623);; cellular component: organelle (GO:0043226);; cellular component: cell part (GO:0044464);; biological process: immune system process (GO:0002376);; biological process: cellular process (GO:0009987);; biological process: single-organism process (GO:0044699);; biological process: response to stimulus (GO:0050896);; biological process: multi-organism process (G…	--	1	p3	(GAC)6	18	1812	1829	AACCGCACTTAAACAAACCG	60.032	20	GTTGAGAATCCTCCGTCGTC	59.661	20	205	1729	1933	CCTCCACCTCCGTCTCATTA	60.065	20
c70279.graph_c1	30.95	25.76	27.82	30.99	29.99	29.02	28.36	27.5	33.25	29.2933	2.12344	0.0724887	0.0695057	0.0695057	0.133142	0.133142	0.0729921	0.0729921	--	--	--	--	--	--	--	--	--	--	--	--	--	3	p1	(T)11	11	1135	1145	TGGAAGTGTTTGGGGATAGG	59.784	20	TTTTGGTTTCTTTTGGTGGG	59.811	20	228	1034	1261	GGTGGAAGTGTTTGGGGATA	59.647	20
c69311.graph_c1	29.26	32.53	25.87	24.28	30.32	25.84	26.94	27.31	18.86	26.8011	3.69286	0.137788	0.0324821	0.0324821	-0.133101	0.133101	-0.156331	0.156331	[G]	Carbohydrate transport and metabolism	Molecular Function: magnesium ion binding (GO:0000287);; Molecular Function: pyruvate kinase activity (GO:0004743);; Biological Process: glycolytic process (GO:0006096);; Biological Process: phosphorylation (GO:0016310);; Molecular Function: potassium ion binding (GO:0030955);;	K00873|3.48803e-155|vvi:100257566|pyruvate kinase isozyme G, chloroplastic; K00873 pyruvate kinase [EC:2.7.1.40] (A)	[G]	Carbohydrate transport and metabolism	Pyruvate kinase, barrel domain;; POT family;; Major Facilitator Superfamily;; Pyruvate kinase, barrel domain;; Pyruvate kinase, alpha/beta domain;; POT family	Pyruvate kinase isozyme G, chloroplastic (Precursor) OS=Nicotiana tabacum (Common tobacco) PE=2 SV=1	P	Inorganic ion transport and metabolism	PREDICTED: protein NRT1/ PTR FAMILY 7.3-like [Beta vulgaris subsp. vulgaris]	molecular function: binding (GO:0005488);; biological process: metabolic process (GO:0008152);; biological process: cellular process (GO:0009987);; molecular function: catalytic activity (GO:0003824);; biological process: single-organism process (GO:0044699)	Glycolysis / Gluconeogenesis (ko00010);; Purine metabolism (ko00230);; Pyruvate metabolism (ko00620);; Carbon metabolism (ko01200);; Biosynthesis of amino acids (ko01230)	1	p2	(CT)6	12	2216	2227	CGGCATTGTTTGTGTGGTAG	60.027	20	GAGGAATGAATCCAATCATCAA	58.835	22	241	2034	2274	TTGCTGCATTTTTGATCAGG	59.809	20
c63404.graph_c0	11.74	13.65	11.53	10.5	12.58	12.38	12.58	13.11	12.3	12.2633	0.867705	0.070756	-0.0419173	0.0419173	0.13303	0.13303	0.184856	0.184856	--	--	--	K11137|0|pmum:103338014|telomere length regulation protein TEL2 homolog; K11137 telomere length regulation protein (A)	[S]	Function unknown	Telomere length regulation protein	Probable protein phosphatase 2C 19 OS=Oryza sativa subsp. japonica (Rice) PE=3 SV=2	S	Function unknown	PREDICTED: telomere length regulation protein TEL2 homolog [Prunus mume]	--	--	1	p1	(A)13	13	2809	2821	GACAACAGGAAGCTCCGAAC	59.851	20	CACTGAACAAGGGGAGCAAT	60.111	20	264	2647	2910	GACAACAGGAAGCTCCGAAC	59.851	20
c66154.graph_c0	32.87	33.22	31.81	26.57	30.13	29.64	24.77	24.77	27.37	29.0167	3.10399	0.106973	-0.0852431	0.0852431	-0.132387	0.132387	-0.0373562	0.0373562	[T]	Signal transduction mechanisms	Cellular Component: protein phosphatase type 2A complex (GO:0000159);; Biological Process: signal transduction (GO:0007165);; Molecular Function: protein phosphatase type 2A regulator activity (GO:0008601);;	K04354|1.51128e-152|vvi:100243351|serine/threonine protein phosphatase 2A 55 kDa regulatory subunit B beta isoform-like; K04354 serine/threonine-protein phosphatase 2A regulatory subunit B (A)	[T]	Signal transduction mechanisms	WD domain, G-beta repeat	Serine/threonine protein phosphatase 2A 55 kDa regulatory subunit B beta isoform GN=PP2AB2 OS=Arabidopsis thaliana (Mouse-ear cress) PE=1 SV=1	T	Signal transduction mechanisms	PREDICTED: serine/threonine protein phosphatase 2A 55 kDa regulatory subunit B beta isoform-like isoform X1 [Vitis vinifera]	cellular component: cell (GO:0005623);; cellular component: macromolecular complex (GO:0032991);; cellular component: cell part (GO:0044464);; biological process: cellular process (GO:0009987);; biological process: signaling (GO:0023052);; biological process: single-organism process (GO:0044699);; biological process: response to stimulus (GO:0050896);; biological process: biological regulation (G…	mRNA surveillance pathway (ko03015)	1	p1	(T)15	15	44	58	AAATGGAATCTTTTCGGCG	60.024	19	CTTGATTGCTTGCTCTGCTG	59.888	20	236	3	238	ATGGAATCTTTTCGGCGAC	60.029	19
c70018.graph_c1	42.85	31.62	33.33	31.78	38.51	38.07	40.55	37.69	37.48	36.8756	3.65876	0.0992192	-0.0239361	0.0239361	0.13197	0.13197	0.164743	0.164743	--	--	--	--	--	--	--	--	S	Function unknown	PREDICTED: uncharacterized protein LOC102630771 [Citrus sinensis]	--	--	1	p1	(A)16	16	1023	1038	ATGTTGGGACCGGAACAAT	60.042	19	TGTGCTTGAATTGCTGAAAAA	59.476	21	193	946	1138	ATGTTGGGACCGGAACAAT	60.042	19
c72341.graph_c1	34.65	50.73	48.17	33.21	41.14	44.63	33.9	31.22	38.94	39.6211	6.61207	0.166882	-0.141254	0.141254	-0.131756	0.131756	0.0192205	0.0192205	--	--	--	K14827|1.53609e-145|vvi:100242503|testis-expressed sequence 10 protein homolog; K14827 pre-rRNA-processing protein IPI1 (A)	[S]	Function unknown	Rix1 complex component involved in 60S ribosome maturation	--	S	Function unknown	PREDICTED: testis-expressed sequence 10 protein homolog isoform X1 [Vitis vinifera]	--	--	2	p1	(T)10	10	3727	3736	CTGTTGCCTGTCACAGATGG	60.309	20	GTCTTAACGAGGGCCTCAGA	59.43	20	187	3625	3811	TGTTGTTTGCTGTTGCCTGT	60.347	20
c69868.graph_c1	32.89	40.56	42.54	32.51	40.88	36.38	39.87	30.1	36.45	36.9089	4.10867	0.111319	-0.185553	0.185553	-0.131657	0.131657	0.0621116	0.0621116	--	--	--	--	[U]	Intracellular trafficking, secretion, and vesicular transport	Endomembrane protein 70	Transmembrane 9 superfamily member 4 {ECO:0000305} (Precursor) OS=Arabidopsis thaliana (Mouse-ear cress) PE=2 SV=1	U	Intracellular trafficking, secretion, and vesicular transport	PREDICTED: putative phagocytic receptor 1b [Nelumbo nucifera]	--	--	1	c	(T)11cctgcttttttgtcaccccaatagatac(T)13	52	772	823	GGTTCAATCCCATTGAGGTG	60.173	20	TCTTTACTTTGCCTCGGCTC	59.592	20	184	730	913	CCTATTGGTCAACCGACACC	60.232	20
c47858.graph_c0	19.9	15.84	18.71	22.19	21.37	23.54	26.94	21.43	19.98	21.1	2.93453	0.139077	0.122104	0.122104	0.131557	0.131557	0.0188408	0.0188408	--	--	--	K03120|2.59397e-07|pop:POPTR_0013s05580g|POPTRDRAFT_730014; TATA-box binding family protein; K03120 transcription initiation factor TFIID TATA-box-binding protein (A)	[K]	Transcription	--	TATA-box-binding protein 1 GN=TBP1 OS=Arabidopsis thaliana (Mouse-ear cress) PE=1 SV=1	K	Transcription	PREDICTED: TATA-box-binding protein isoform X2 [Populus euphratica]	--	Basal transcription factors (ko03022)	1	c	(CA)6gagagacag(AT)7	35	533	567	CCCGAATATTTCTGAACAGGAC	59.835	22	GAGCTGATCCGTTTTCCTTG	59.813	20	250	491	740	CCCGAATATTTCTGAACAGGAC	59.835	22
c61580.graph_c0	35.59	40.52	38	37.2	40.77	35.56	41.8	38.56	34.68	38.0756	2.40716	0.0632205	0.0365864	0.0365864	0.131495	0.131495	0.104379	0.104379	--	--	Cellular Component: cell wall (GO:0005618);; Cellular Component: Golgi apparatus (GO:0005794);; Cellular Component: cytosol (GO:0005829);; Biological Process: glucose catabolic process (GO:0006007);; Molecular Function: glycogenin glucosyltransferase activity (GO:0008466);; Cellular Component: plasmodesma (GO:0009506);; Biological Process: response to salt stress (GO:0009651);; Biological Process…	K13379|0|fve:101306933|probable UDP-arabinopyranose mutase 5-like isoform 1; K13379 reversibly glycosylated polypeptide / UDP-arabinopyranose mutase [EC:2.4.1.- 5.4.99.30] (A)	--	--	Reversibly glycosylated polypeptide	Probable UDP-arabinopyranose mutase 5 GN=RGP5 OS=Arabidopsis thaliana (Mouse-ear cress) PE=1 SV=1	R	General function prediction only	PREDICTED: probable UDP-arabinopyranose mutase 5-like isoform 1 [Fragaria vesca subsp. vesca]	cellular component: cell (GO:0005623);; cellular component: cell part (GO:0044464);; cellular component: organelle (GO:0043226);; biological process: metabolic process (GO:0008152);; biological process: single-organism process (GO:0044699);; molecular function: catalytic activity (GO:0003824);; cellular component: cell junction (GO:0030054);; cellular component: symplast (GO:0055044);; biological…	--	1	p1	(T)11	11	2048	2058	GCTGCCAAAGCGATTGACTA	61.438	20	GCAGGATTGAAGTCGGAAAA	60.192	20	269	1968	2236	ATGTGAGCGCATGTTTGTGT	60.192	20
c71075.graph_c0	14.25	14.46	12.77	13.58	13.18	12.32	16.02	13.24	12.69	13.6122	1.07904	0.07927	-0.0410244	0.0410244	0.131435	0.131435	0.182311	0.182311	--	--	--	--	[T]	Signal transduction mechanisms	--	--	T	Signal transduction mechanisms	PREDICTED: lisH domain and HEAT repeat-containing protein KIAA1468 homolog [Vitis vinifera]	--	--	--	--	--	--	--	--	--	--	--	--	--	--	--	--	--	--	--	--
c67010.graph_c0	14.07	17.72	20.71	17.84	19.03	21.59	19	17.34	17.39	18.2989	2.05063	0.112063	0.185042	0.185042	0.131259	0.131259	-0.0437297	0.0437297	[O]	Posttranslational modification, protein turnover, chaperones	--	K10581|0|vvi:100258896|probable ubiquitin-conjugating enzyme E2 23; K10581 ubiquitin-conjugating enzyme E2 O [EC:6.3.2.19] (A)	[O]	Posttranslational modification, protein turnover, chaperones	Ubiquitin-conjugating enzyme	Probable ubiquitin-conjugating enzyme E2 23 GN=UBC23 OS=Arabidopsis thaliana (Mouse-ear cress) PE=1 SV=1	O	Posttranslational modification, protein turnover, chaperones	PREDICTED: probable ubiquitin-conjugating enzyme E2 23 isoform X1 [Vitis vinifera]	--	Ubiquitin mediated proteolysis (ko04120)	--	--	--	--	--	--	--	--	--	--	--	--	--	--	--	--	--	--
c56905.graph_c1	19.93	19.71	17.43	18.58	17.79	17.21	20.38	19.91	17.78	18.7467	1.17008	0.0624154	-0.0551834	0.0551834	0.131206	0.131206	0.196508	0.196508	[LKJ]	--	Molecular Function: nucleic acid binding (GO:0003676);; Molecular Function: ATP binding (GO:0005524);; Molecular Function: ATP-dependent helicase activity (GO:0008026);;	K13181|0|rcu:RCOM_1598290|dead box ATP-dependent RNA helicase, putative; K13181 ATP-dependent RNA helicase DDX27 [EC:3.6.4.13] (A)	[A]	RNA processing and modification	DEAD/DEAH box helicase;; Helicase conserved C-terminal domain	DEAD-box ATP-dependent RNA helicase 28 GN=RH28 OS=Arabidopsis thaliana (Mouse-ear cress) PE=2 SV=1	A	RNA processing and modification	dead box ATP-dependent RNA helicase, putative [Ricinus communis]	molecular function: binding (GO:0005488);; biological process: metabolic process (GO:0008152);; biological process: cellular process (GO:0009987);; biological process: single-organism process (GO:0044699);; molecular function: catalytic activity (GO:0003824)	--	--	--	--	--	--	--	--	--	--	--	--	--	--	--	--	--	--	--
c19221.graph_c0	32.28	30.83	28.82	30.32	33.48	31.38	34.59	28.14	30.55	31.1544	1.95028	0.0626005	0.0964035	0.0964035	0.131043	0.131043	0.0437178	0.0437178	--	--	Cellular Component: nucleus (GO:0005634);; Biological Process: regulation of transcription, DNA-templated (GO:0006355);; Cellular Component: integral component of membrane (GO:0016021);;	K15077|3.8182e-99|pop:POPTR_0012s05560g|POPTRDRAFT_569847; hypothetical protein; K15077 elongin-A (A)	[K]	Transcription	RNA polymerase II transcription factor SIII (Elongin) subunit A	--	K	Transcription	Elongin-A [Gossypium arboreum]	cellular component: cell (GO:0005623);; cellular component: organelle (GO:0043226);; cellular component: cell part (GO:0044464);; biological process: biological regulation (GO:0065007);; cellular component: membrane (GO:0016020);; cellular component: membrane part (GO:0044425)	--	--	--	--	--	--	--	--	--	--	--	--	--	--	--	--	--	--	--
c71067.graph_c2	8.84	6.32	6.16	7	7.77	6.22	6.17	6.93	6.97	6.93111	0.843728	0.121731	0.0740163	0.0740163	0.130859	0.130859	0.0655706	0.0655706	--	--	Biological Process: lipid metabolic process (GO:0006629);; Molecular Function: lipase activity (GO:0016298);;	--	--	--	GDSL-like Lipase/Acylhydrolase;; GDSL-like Lipase/Acylhydrolase	GDSL esterase/lipase At5g22810 (Precursor) GN=At5g22810 OS=Arabidopsis thaliana (Mouse-ear cress) PE=3 SV=3	I	Lipid transport and metabolism	hypothetical protein JCGZ_11232 [Jatropha curcas]	biological process: metabolic process (GO:0008152);; biological process: single-organism process (GO:0044699);; molecular function: catalytic activity (GO:0003824)	--	--	--	--	--	--	--	--	--	--	--	--	--	--	--	--	--	--	--
c66695.graph_c0	157.56	142.93	142.27	146.53	149.59	138.5	158.64	130.58	135.79	144.71	8.90196	0.0615158	0.0792026	0.0792026	0.130738	0.130738	0.0607203	0.0607203	[R]	General function prediction only	Molecular Function: GTP binding (GO:0005525);; Biological Process: small GTPase mediated signal transduction (GO:0007264);; Biological Process: protein transport (GO:0015031);; Molecular Function: hydrolase activity (GO:0016787);;	K07901|3.55152e-107|tcc:TCM_021994|Ras-related small GTP-binding family protein; K07901 Ras-related protein Rab-8A (A)	[TU]	--	Ras family;; Miro-like protein	Ras-related protein RABE1c GN=F12M12.30 OS=Arabidopsis thaliana (Mouse-ear cress) PE=1 SV=1	U	Intracellular trafficking, secretion, and vesicular transport	PREDICTED: ras-related protein RABE1a-like [Tarenaya hassleriana]	molecular function: binding (GO:0005488);; biological process: cellular process (GO:0009987);; biological process: signaling (GO:0023052);; biological process: single-organism process (GO:0044699);; biological process: response to stimulus (GO:0050896);; biological process: biological regulation (GO:0065007);; biological process: localization (GO:0051179);; biological process: metabolic process (…	--	2	p2	(AC)6	12	2157	2168	ATGCATGCCCAAGGTAGAAA	60.469	20	CCCCAATTAAACTTTTGCGA	59.937	20	176	2036	2211	AATGCATGCCCAAGGTAGAA	60.469	20
c70344.graph_c2	13.25	15.71	12.03	14.31	17.39	13.51	13.75	13.77	13.09	14.09	1.49318	0.105975	-0.0488719	0.0488719	-0.130706	0.130706	-0.0728967	0.0728967	--	--	Molecular Function: carbohydrate binding (GO:0030246);;	--	[S]	Function unknown	--	ER membrane protein complex subunit 7 homolog (Precursor) GN=At4g32130 OS=Arabidopsis thaliana (Mouse-ear cress) PE=2 SV=1	S	Function unknown	unknown [Zea mays]	molecular function: binding (GO:0005488)	--	2	p2	(TA)6	12	1489	1500	TTTTTGAGGCCTGATGGATA	58.16	20	CACCCCACTCTTCTCTTCCA	60.229	20	271	1251	1521	TTGAGGCCTGATGGATATTTTT	59.808	22
c65514.graph_c0	506.47	463.41	548.14	466.45	593.76	551.33	436.2	556.98	555.91	519.85	50.7131	0.0975533	0.121353	0.121353	0.130671	0.130671	0.0182938	0.0182938	[OD]	--	Molecular Function: zinc ion binding (GO:0008270);;	K03868|9.81213e-17|cmo:103498857|RING-box protein 1a-like; K03868 RING-box protein 1 (A)	[O]	Posttranslational modification, protein turnover, chaperones	--	RING-box protein 1a GN=F7C8.160 OS=Arabidopsis thaliana (Mouse-ear cress) PE=1 SV=1	O	Posttranslational modification, protein turnover, chaperones	hypothetical protein MIMGU_mgv1a022668mg, partial [Erythranthe guttata]	molecular function: binding (GO:0005488)	Nucleotide excision repair (ko03420);; Ubiquitin mediated proteolysis (ko04120);; Protein processing in endoplasmic reticulum (ko04141)	1	p2	(TA)8	16	1562	1577	GAATGGCATCAATTTGGCTT	59.907	20	TGCACGCAAATAAACACACA	59.759	20	270	1470	1739	GAATGGCATCAATTTGGCTT	59.907	20
c70211.graph_c0	7.49	6.48	7.43	8.06	8.08	7.65	7.33	8.28	5.95	7.41667	0.72228	0.0973861	0.197037	0.197037	0.130117	0.130117	-0.0574705	0.0574705	[RTKL]	--	Molecular Function: protein serine/threonine kinase activity (GO:0004674);; Molecular Function: ATP binding (GO:0005524);; Cellular Component: plasma membrane (GO:0005886);; Biological Process: protein phosphorylation (GO:0006468);; Cellular Component: plant-type cell wall (GO:0009505);; Cellular Component: chloroplast stroma (GO:0009570);; Cellular Component: integral component of membrane (GO:0…	--	--	--	Protein kinase domain;; Protein tyrosine kinase;; Leucine Rich Repeat;; Leucine rich repeat;; Leucine Rich repeats (2 copies);; Leucine rich repeat N-terminal domain;; Leucine rich repeat;; Leucine Rich repeat	Probable inactive leucine-rich repeat receptor-like protein kinase At1g66830 (Precursor) GN=At1g66830 OS=Arabidopsis thaliana (Mouse-ear cress) PE=2 SV=1	T	Signal transduction mechanisms	hypothetical protein JCGZ_09313 [Jatropha curcas]	biological process: metabolic process (GO:0008152);; biological process: cellular process (GO:0009987);; molecular function: catalytic activity (GO:0003824);; molecular function: binding (GO:0005488);; cellular component: cell (GO:0005623);; cellular component: membrane (GO:0016020);; cellular component: cell part (GO:0044464);; cellular component: organelle (GO:0043226);; cellular component: org…	--	1	p1	(A)11	11	2612	2622	TGCATGTAATCCCATTCCAA	59.745	20	CCAAAGGTAAGCCCTGTGAA	60.103	20	261	2420	2680	GAACCCACAAGAGCACAACA	59.726	20
c72901.graph_c5	66.9	64.99	60.17	54.16	63.03	56.19	58.08	57.8	53.41	59.4144	4.46231	0.0751049	-0.146497	0.146497	-0.13003	0.13003	0.0256575	0.0256575	--	--	Molecular Function: structural molecule activity (GO:0005198);; Biological Process: intracellular protein transport (GO:0006886);; Biological Process: vesicle-mediated transport (GO:0016192);; Cellular Component: COPI vesicle coat (GO:0030126);;	K17267|1.30365e-81|tcc:TCM_006902|Coatomer gamma-2 subunit / gamma-2 coat protein / gamma-2 COP, putative isoform 1; K17267 coatomer protein complex, subunit gamma (A)	[U]	Intracellular trafficking, secretion, and vesicular transport	--	Coatomer subunit gamma-2 OS=Oryza sativa subsp. japonica (Rice) PE=2 SV=1	U	Intracellular trafficking, secretion, and vesicular transport	Coatomer gamma-2 subunit / gamma-2 coat protein / gamma-2 COP, putative isoform 1 [Theobroma cacao]	molecular function: structural molecule activity (GO:0005198);; biological process: localization (GO:0051179);; cellular component: cell (GO:0005623);; cellular component: membrane (GO:0016020);; cellular component: macromolecular complex (GO:0032991);; cellular component: organelle (GO:0043226);; cellular component: organelle part (GO:0044422);; cellular component: membrane part (GO:0044425);; c…	--	3	p3	(AAT)5	15	1277	1291	GAAGGATGTCACTGCGTCAA	59.837	20	TTCTTTCTCCCCTCGTATGC	59.269	20	178	1161	1338	TGCGAAACTGAAGGATGTCA	60.39	20
c59397.graph_c1	11.23	14.31	11.22	12.09	12.86	11.54	9.56	10.96	9.24	11.4456	1.46753	0.128218	0.0526456	0.0526456	-0.129771	0.129771	-0.172427	0.172427	[R]	General function prediction only	--	K12741|1.13552e-110|vvi:100266260|UBP1-associated protein 2B-like; K12741 heterogeneous nuclear ribonucleoprotein A1/A3 (A)	[R]	General function prediction only	RNA recognition motif. (a.k.a. RRM, RBD, or RNP domain);; RNA recognition motif (a.k.a. RRM, RBD, or RNP domain);; RNA recognition motif. (a.k.a. RRM, RBD, or RNP domain)	UBP1-associated protein 2B GN=UBA2B OS=Arabidopsis thaliana (Mouse-ear cress) PE=2 SV=1	R	General function prediction only	PREDICTED: UBP1-associated protein 2A-like [Nelumbo nucifera]	--	Spliceosome (ko03040)	--	--	--	--	--	--	--	--	--	--	--	--	--	--	--	--	--	--
c58761.graph_c0	39.52	41.09	39.8	35.15	37.68	37.83	32.9	37.59	32.07	37.07	2.9233	0.0788589	-0.0781561	0.0781561	-0.129519	0.129519	-0.0411715	0.0411715	--	--	--	K13210|3.02848e-41|vvi:100253453|far upstream element-binding protein 1; K13210 far upstream element-binding protein (A)	[A]	RNA processing and modification	--	--	A	RNA processing and modification	hypothetical protein JCGZ_17222 [Jatropha curcas]	--	--	--	--	--	--	--	--	--	--	--	--	--	--	--	--	--	--	--	--
c63859.graph_c1	36.62	32.63	30.37	25.76	32.66	28.58	30.4	31.86	27.14	30.6689	3.08618	0.100629	-0.187518	0.187518	-0.129231	0.129231	0.0672828	0.0672828	[RTKL]	--	Molecular Function: protein serine/threonine kinase activity (GO:0004674);; Molecular Function: ATP binding (GO:0005524);; Biological Process: protein phosphorylation (GO:0006468);;	K04368|1.46934e-69|cic:CICLE_v10008579mg|hypothetical protein; K04368 mitogen-activated protein kinase kinase 1 [EC:2.7.12.2] (A)	[T]	Signal transduction mechanisms	Protein kinase domain;; Protein tyrosine kinase	Mitogen-activated protein kinase kinase 2 GN=F27B13.50 OS=Arabidopsis thaliana (Mouse-ear cress) PE=1 SV=2	T	Signal transduction mechanisms	hypothetical protein CICLE_v10008579mg [Citrus clementina]	biological process: metabolic process (GO:0008152);; biological process: cellular process (GO:0009987);; molecular function: catalytic activity (GO:0003824);; molecular function: binding (GO:0005488)	Plant-pathogen interaction (ko04626)	--	--	--	--	--	--	--	--	--	--	--	--	--	--	--	--	--	--
c67004.graph_c1	79.17	71.28	72.2	69.65	80.5	70.8	62.15	55.43	59.72	68.9889	7.97193	0.115554	0.0115676	0.0115676	-0.128782	0.128782	-0.130795	0.130795	[P]	Inorganic ion transport and metabolism	Cellular Component: integral component of membrane (GO:0016021);; Biological Process: transmembrane transport (GO:0055085);;	K13754|0|pmum:103340600|cation/calcium exchanger 4-like; K13754 solute carrier family 24 (sodium/potassium/calcium exchanger), member 6 (A)	[P]	Inorganic ion transport and metabolism	Sodium/calcium exchanger protein;; RNA polymerase Rpb8	Cation/calcium exchanger 4 GN=F15I1.21 OS=Arabidopsis thaliana (Mouse-ear cress) PE=2 SV=1	P	Inorganic ion transport and metabolism	PREDICTED: cation/calcium exchanger 4-like [Eucalyptus grandis]	cellular component: membrane (GO:0016020);; cellular component: membrane part (GO:0044425);; biological process: cellular process (GO:0009987);; biological process: single-organism process (GO:0044699);; biological process: localization (GO:0051179)	--	1	p2	(AT)7	14	1679	1692	TTTTCTCTCAACCAAATAATGAAAAA	59.495	26	CATATGCCCAGCCTTTCAAT	59.923	20	196	1586	1781	TTTCTCTCAACCAAATAATGAAAAA	58.366	25
c68314.graph_c0	18.13	19.54	25.4	19.23	22.55	23.04	21.19	21.83	22.08	21.4433	2.09624	0.0977572	0.061101	0.061101	0.128728	0.128728	0.076936	0.076936	--	--	--	--	--	--	FAR1 DNA-binding domain;; MULE transposase domain;; SWIM zinc finger	Protein FAR1-RELATED SEQUENCE 5 GN=FRS5 OS=Arabidopsis thaliana (Mouse-ear cress) PE=2 SV=1	S	Function unknown	hypothetical protein JCGZ_10765 [Jatropha curcas]	--	--	1	p1	(T)11	11	3164	3174	AAATGGCAAAACTGCCAAAC	59.982	20	TTTAAAGGCGAAACTCACGC	60.376	20	194	3113	3306	GGAATTTGTGCTTTTGGGAA	59.916	20
c69277.graph_c0	7.84	8.35	8.81	7.86	8.48	8.5	8.32	8.21	8.72	8.34333	0.317665	0.0380741	0.0257315	0.0257315	0.128252	0.128252	0.112328	0.112328	--	--	--	--	--	--	N-terminal C2 in EEIG1 and EHBP1 proteins;; LysM domain	--	S	Function unknown	PREDICTED: uncharacterized protein LOC103340545 [Prunus mume]	--	--	--	--	--	--	--	--	--	--	--	--	--	--	--	--	--	--	--	--
c71803.graph_c0	43.26	39.47	34.44	39.37	49.12	39.46	40.95	39.03	40.02	40.5689	3.72105	0.0917218	0.0706966	0.0706966	0.128124	0.128124	0.0659811	0.0659811	[Z]	Cytoskeleton	Molecular Function: motor activity (GO:0003774);; Molecular Function: ATP binding (GO:0005524);; Cellular Component: myosin complex (GO:0016459);;	K10357|0|cic:CICLE_v10007271mg|hypothetical protein; K10357 myosin V (A)	[Z]	Cytoskeleton	Myosin head (motor domain);; Myosin head (motor domain);; IQ calmodulin-binding motif	Myosin-2 GN=MDK4.10 OS=Arabidopsis thaliana (Mouse-ear cress) PE=2 SV=1	Z	Cytoskeleton	hypothetical protein CICLE_v10007271mg [Citrus clementina]	biological process: metabolic process (GO:0008152);; molecular function: catalytic activity (GO:0003824);; molecular function: binding (GO:0005488);; cellular component: cell (GO:0005623);; cellular component: macromolecular complex (GO:0032991);; cellular component: organelle (GO:0043226);; cellular component: organelle part (GO:0044422);; cellular component: cell part (GO:0044464)	--	--	--	--	--	--	--	--	--	--	--	--	--	--	--	--	--	--	--
c65863.graph_c0	45.82	51.57	50.87	43.96	47.18	45.95	51.43	46.68	44.06	47.5022	2.86224	0.0602548	-0.0160761	0.0160761	0.127617	0.127617	0.153625	0.153625	--	--	--	--	--	--	--	Uncharacterized protein At4g26450 GN=At4g26450 OS=Arabidopsis thaliana (Mouse-ear cress) PE=4 SV=1	S	Function unknown	hypothetical protein CICLE_v10007600mg [Citrus clementina]	--	--	--	--	--	--	--	--	--	--	--	--	--	--	--	--	--	--	--	--
c70734.graph_c0	25.34	20.84	21.17	20.61	21.42	22.8	19.8	17.64	19.34	20.9956	2.05328	0.0977959	0.0111468	0.0111468	-0.127561	0.127561	-0.129276	0.129276	[R]	General function prediction only	Biological Process: karyogamy (GO:0000741);; Cellular Component: nucleolus (GO:0005730);; Biological Process: mRNA export from nucleus (GO:0006406);; Biological Process: protein import into nucleus (GO:0006606);; Biological Process: embryo sac egg cell differentiation (GO:0009560);; Cellular Component: Cul4-RING E3 ubiquitin ligase complex (GO:0080008);;	K14788|7.31235e-132|cic:CICLE_v100279791m|hypothetical protein; K14788 ribosome biogenesis protein ENP2 (A)	[R]	General function prediction only	--	--	R	General function prediction only	PREDICTED: nucleolar protein 10 [Nelumbo nucifera]	biological process: cellular process (GO:0009987);; biological process: cellular component organization or biogenesis (GO:0071840);; cellular component: cell (GO:0005623);; cellular component: membrane-enclosed lumen (GO:0031974);; cellular component: organelle (GO:0043226);; cellular component: organelle part (GO:0044422);; cellular component: cell part (GO:0044464);; biological process: metabol…	--	--	--	--	--	--	--	--	--	--	--	--	--	--	--	--	--	--	--
c68368.graph_c0	39.78	35.45	28.44	32.59	34.43	30.03	31.2	29.9	32.22	32.6711	3.2708	0.100113	-0.133891	0.133891	-0.127303	0.127303	0.0170046	0.0170046	--	--	--	K14190|3.04839e-56|vvi:100257803|GDP-L-galactose phosphorylase 1-like; K14190 GDP-L-galactose phosphorylase [EC:2.7.7.69] (A)	[R]	General function prediction only	--	GDP-L-galactose phosphorylase 1 GN=VTC2 OS=Arabidopsis thaliana (Mouse-ear cress) PE=1 SV=1	R	General function prediction only	PREDICTED: GDP-L-galactose phosphorylase 1-like isoform X3 [Vitis vinifera]	--	Ascorbate and aldarate metabolism (ko00053)	2	p1	(T)11	11	2540	2550	TTTGCACTGGGATTTCTTCC	60.051	20	TCGTTTCCCTTAACCTTTTCC	59.467	21	236	2348	2583	TTGCTCACTTTGTTCAACCG	59.881	20
c66980.graph_c2	16.5	19.05	20.88	20.8	29.11	21.55	26.2	23.98	22.58	22.2944	3.55149	0.1593	0.0044691	0.0044691	0.12718	0.12718	0.131046	0.131046	--	--	Molecular Function: binding (GO:0005488);; Cellular Component: nucleus (GO:0005634);; Biological Process: single-organism process (GO:0044699);;	K11649|4.55202e-73|vvi:100258194|SWI/SNF complex subunit SWI3B; K11649 SWI/SNF related-matrix-associated actin-dependent regulator of chromatin subfamily C (A)	[B]	Chromatin structure and dynamics	--	SWI/SNF complex subunit SWI3B GN=F4P9.38 OS=Arabidopsis thaliana (Mouse-ear cress) PE=1 SV=1	B	Chromatin structure and dynamics	hypothetical protein VITISV_030794 [Vitis vinifera]	molecular function: binding (GO:0005488);; cellular component: cell (GO:0005623);; cellular component: organelle (GO:0043226);; cellular component: cell part (GO:0044464);; biological process: single-organism process (GO:0044699)	--	1	p1	(T)15	15	1	15	--	--	--	--	--	--	--	--	--	--	--	--
c72647.graph_c0	15.1	17.52	16.94	13.58	17.64	19.08	16.45	17.06	18.16	16.8367	1.55378	0.0922853	-0.0373761	0.0373761	0.12689	0.12689	0.174305	0.174305	[TDBLU]	--	--	K00888|0|pmum:103328603|phosphatidylinositol 4-kinase beta 1-like; K00888 phosphatidylinositol 4-kinase [EC:2.7.1.67] (A)	[TU]	--	Phosphatidylinositol 3- and 4-kinase	Phosphatidylinositol 4-kinase beta 1 GN=MHJ24.5 OS=Arabidopsis thaliana (Mouse-ear cress) PE=1 SV=1	T	Signal transduction mechanisms	PREDICTED: phosphatidylinositol 4-kinase beta 1-like [Prunus mume]	--	Inositol phosphate metabolism (ko00562);; Phosphatidylinositol signaling system (ko04070)	--	--	--	--	--	--	--	--	--	--	--	--	--	--	--	--	--	--
c66332.graph_c2	9.97	11.16	10.15	8.72	9.9	9.59	8.2	9.82	8.42	9.54778	0.889054	0.0931163	-0.102428	0.102428	-0.126885	0.126885	-0.014077	0.014077	[RTKL]	--	Molecular Function: protein serine/threonine kinase activity (GO:0004674);; Molecular Function: ATP binding (GO:0005524);; Biological Process: protein phosphorylation (GO:0006468);;	--	--	--	Protein kinase domain;; Protein tyrosine kinase;; Ethylene-responsive protein kinase Le-CTR1;; Leucine rich repeat;; Leucine Rich repeats (2 copies);; Leucine Rich Repeat;; Leucine rich repeat;; Lipopolysaccharide kinase (Kdo/WaaP) family	Mitogen-activated protein kinase kinase kinase YODA GN=YDA OS=Arabidopsis thaliana (Mouse-ear cress) PE=1 SV=1	T	Signal transduction mechanisms	PREDICTED: ras guanine nucleotide exchange factor L [Vitis vinifera]	biological process: metabolic process (GO:0008152);; biological process: cellular process (GO:0009987);; molecular function: catalytic activity (GO:0003824);; molecular function: binding (GO:0005488)	--	--	--	--	--	--	--	--	--	--	--	--	--	--	--	--	--	--	--
c52778.graph_c0	11.01	12.82	10.46	12.01	8.69	15.59	13.98	9.93	12.74	11.9144	2.01537	0.169153	0.088907	0.088907	0.126751	0.126751	0.0501321	0.0501321	--	--	--	--	--	--	--	--	--	--	--	--	--	--	--	--	--	--	--	--	--	--	--	--	--	--	--	--	--	--	--
c65938.graph_c1	52.25	61.75	66.26	57.9	60.49	68.3	65.84	63.63	63.18	62.1778	4.60149	0.0740053	0.0379542	0.0379542	0.126687	0.126687	0.0989196	0.0989196	--	--	--	K12655|5.30333e-97|pmum:103328426|OTU domain-containing protein 5-B; K12655 OTU domain-containing protein 5 [EC:3.4.19.12] (A)	[TO]	--	OTU-like cysteine protease	--	T	Signal transduction mechanisms	PREDICTED: OTU domain-containing protein 5-B [Prunus mume]	--	--	--	--	--	--	--	--	--	--	--	--	--	--	--	--	--	--	--	--
c71028.graph_c0	21.36	20.41	21.35	20.16	21.32	20.84	20.38	16.29	19.8	20.2122	1.48537	0.0734888	0.00596788	0.00596788	-0.126255	0.126255	-0.123143	0.123143	--	--	--	--	--	--	--	--	S	Function unknown	PREDICTED: uncharacterized protein LOC102627061 isoform X3 [Citrus sinensis]	--	--	8	p1	(A)11	11	3883	3893	TGAACATAAACGCAAGGCAG	59.872	20	CATATATGCTGATCCATTCCCC	60.377	22	260	3659	3918	GTGAACATAAACGCAAGGCA	59.735	20
c61660.graph_c0	178.23	196.9	216.36	187.58	151.26	171.75	162.72	190.37	162.7	179.763	19.0532	0.10599	-0.181114	0.181114	-0.12592	0.12592	0.0666678	0.0666678	--	--	Molecular Function: kinase activity (GO:0016301);; Biological Process: phosphorylation (GO:0016310);;	--	[R]	General function prediction only	Leucine Rich Repeat;; Leucine rich repeat;; Leucine Rich repeats (2 copies);; Leucine rich repeat	BRASSINOSTEROID INSENSITIVE 1-associated receptor kinase 1 (Precursor) GN=F17M5.190 OS=Arabidopsis thaliana (Mouse-ear cress) PE=1 SV=2	R	General function prediction only	Somatic embryogenesis receptor kinase 1 [Morus notabilis]	biological process: metabolic process (GO:0008152);; biological process: cellular process (GO:0009987);; molecular function: catalytic activity (GO:0003824)	--	--	--	--	--	--	--	--	--	--	--	--	--	--	--	--	--	--	--
c64149.graph_c1	17.36	21.37	21.02	19.13	18.18	21.05	20.77	20.16	20.17	19.9122	1.31811	0.0661961	-0.0454838	0.0454838	0.125889	0.125889	0.182377	0.182377	--	--	Molecular Function: zinc ion binding (GO:0008270);;	--	[O]	Posttranslational modification, protein turnover, chaperones	--	Probable E3 ubiquitin-protein ligase LUL4 GN=F28L1.8 OS=Arabidopsis thaliana (Mouse-ear cress) PE=2 SV=1	O	Posttranslational modification, protein turnover, chaperones	unnamed protein product [Vitis vinifera]	molecular function: binding (GO:0005488)	--	--	--	--	--	--	--	--	--	--	--	--	--	--	--	--	--	--	--
c63564.graph_c1	15	14.37	14.13	14.46	13.25	13.47	13.87	14.34	13.78	14.0744	0.509883	0.0362275	0.068434	0.068434	0.125796	0.125796	0.0678927	0.0678927	--	--	Cellular Component: plastid chromosome (GO:0009508);;	--	--	--	--	--	S	Function unknown	putative nicotinate-nucleotide adenylyltransferase [Gossypium arboreum]	cellular component: cell (GO:0005623);; cellular component: nucleoid (GO:0009295);; cellular component: organelle (GO:0043226);; cellular component: organelle part (GO:0044422);; cellular component: cell part (GO:0044464)	--	--	--	--	--	--	--	--	--	--	--	--	--	--	--	--	--	--	--
c69137.graph_c0	17.12	13.76	10.44	12.05	13.5	13.22	11.29	11.74	10.77	12.6544	1.93553	0.152952	-0.0392118	0.0392118	-0.125782	0.125782	-0.0767165	0.0767165	--	--	Cellular Component: peroxisomal membrane (GO:0005778);; Cellular Component: chloroplast envelope (GO:0009941);; Cellular Component: integral component of membrane (GO:0016021);;	K13347|2.89647e-112|vvi:100243066|protein sym-1; K13347 peroxisomal membrane protein 2 (A)	[R]	General function prediction only	Mpv17 / PMP22 family	Peroxisomal membrane protein PMP22 GN=PMP22 OS=Arabidopsis thaliana (Mouse-ear cress) PE=1 SV=1	R	General function prediction only	PREDICTED: protein sym-1 [Vitis vinifera]	cellular component: cell (GO:0005623);; cellular component: membrane (GO:0016020);; cellular component: organelle (GO:0043226);; cellular component: organelle part (GO:0044422);; cellular component: cell part (GO:0044464);; cellular component: membrane part (GO:0044425)	Peroxisome (ko04146)	--	--	--	--	--	--	--	--	--	--	--	--	--	--	--	--	--	--
c70093.graph_c2	13.12	14.96	13.67	14.29	13.84	14.13	15.36	11.8	12.88	13.7833	1.02486	0.0743549	0.12112	0.12112	0.125744	0.125744	0.0148419	0.0148419	--	--	Molecular Function: magnesium ion binding (GO:0000287);; Molecular Function: DNA binding (GO:0003677);; Cellular Component: nucleoplasm (GO:0005654);; Cellular Component: nucleolus (GO:0005730);; Cellular Component: mitochondrion (GO:0005739);; Biological Process: base-excision repair (GO:0006284);; Molecular Function: 5'-3' exonuclease activity (GO:0008409);; Molecular Function: 5'-flap endonucl…	--	[R]	General function prediction only	PPR repeat family;; PPR repeat;; PPR repeat;; Pentatricopeptide repeat domain;; DYW family of nucleic acid deaminases;; MBOAT, membrane-bound O-acyltransferase family	Pentatricopeptide repeat-containing protein At3g56550 GN=PCMP-H80 OS=Arabidopsis thaliana (Mouse-ear cress) PE=2 SV=1	R	General function prediction only	PREDICTED: pentatricopeptide repeat-containing protein At3g56550 [Vitis vinifera]	molecular function: binding (GO:0005488);; cellular component: cell (GO:0005623);; cellular component: membrane-enclosed lumen (GO:0031974);; cellular component: organelle (GO:0043226);; cellular component: organelle part (GO:0044422);; cellular component: cell part (GO:0044464);; biological process: metabolic process (GO:0008152);; biological process: cellular process (GO:0009987);; biological p…	--	--	--	--	--	--	--	--	--	--	--	--	--	--	--	--	--	--	--
c66627.graph_c0	32.31	28.52	33.09	33.15	34.24	36.67	31.39	32.47	30.42	32.4733	2.17605	0.0670103	0.195623	0.195623	0.125688	0.125688	-0.0603539	0.0603539	[J]	Translation, ribosomal structure and biogenesis	Biological Process: RNA methylation (GO:0001510);; Biological Process: pseudouridine synthesis (GO:0001522);; Molecular Function: RNA binding (GO:0003723);; Cellular Component: nucleolus (GO:0005730);; Cellular Component: cytosol (GO:0005829);; Biological Process: purine nucleotide biosynthetic process (GO:0006164);; Biological Process: RNA processing (GO:0006396);; Cellular Component: plasmodesm…	K11131|0|vvi:100258019|H/ACA ribonucleoprotein complex subunit 4; K11131 H/ACA ribonucleoprotein complex subunit 4 [EC:5.4.99.-] (A)	[J]	Translation, ribosomal structure and biogenesis	DKCLD (NUC011) domain;; TruB family pseudouridylate synthase (N terminal domain);; PUA domain	H/ACA ribonucleoprotein complex subunit 4 GN=F24I3.230 OS=Arabidopsis thaliana (Mouse-ear cress) PE=1 SV=1	J	Translation, ribosomal structure and biogenesis	hypothetical protein JCGZ_13359 [Jatropha curcas]	biological process: metabolic process (GO:0008152);; biological process: cellular process (GO:0009987);; molecular function: binding (GO:0005488);; cellular component: cell (GO:0005623);; cellular component: membrane-enclosed lumen (GO:0031974);; cellular component: organelle (GO:0043226);; cellular component: organelle part (GO:0044422);; cellular component: cell part (GO:0044464);; biological p…	Ribosome biogenesis in eukaryotes (ko03008)	1	p3	(AAG)5	15	2112	2126	GGGCATTGATAATGGTGGAC	60.021	20	CCCTCGTCTATTCCTCTCCC	60.03	20	104	2062	2165	GCTGGTTCACCTGACACTGA	59.872	20
c67837.graph_c0	36.24	36.2	45.98	36.99	42.08	38.98	39.63	41.91	46.04	40.45	3.60877	0.0892156	-0.0286155	0.0286155	0.125646	0.125646	0.164251	0.164251	[I]	Lipid transport and metabolism	Cellular Component: mitochondrion (GO:0005739);; Biological Process: phosphatidylinositol biosynthetic process (GO:0006661);; Molecular Function: CDP-diacylglycerol-glycerol-3-phosphate 3-phosphatidyltransferase activity (GO:0008444);; Cellular Component: chloroplast envelope (GO:0009941);; Cellular Component: integral component of membrane (GO:0016021);;	K00995|8.45195e-89|cit:102607269|hypothetical protein; K00995 CDP-diacylglycerol--glycerol-3-phosphate 3-phosphatidyltransferase [EC:2.7.8.5] (A)	[I]	Lipid transport and metabolism	CDP-alcohol phosphatidyltransferase	CDP-diacylglycerol--glycerol-3-phosphate 3-phosphatidyltransferase 1, chloroplastic (Precursor) GN=T16B24.7 OS=Arabidopsis thaliana (Mouse-ear cress) PE=1 SV=1	I	Lipid transport and metabolism	hypothetical protein CICLE_v10031930mg [Citrus clementina]	cellular component: cell (GO:0005623);; cellular component: organelle (GO:0043226);; cellular component: cell part (GO:0044464);; biological process: metabolic process (GO:0008152);; biological process: cellular process (GO:0009987);; biological process: single-organism process (GO:0044699);; molecular function: catalytic activity (GO:0003824);; cellular component: organelle part (GO:0044422);; c…	Glycerophospholipid metabolism (ko00564)	--	--	--	--	--	--	--	--	--	--	--	--	--	--	--	--	--	--
c61124.graph_c0	11.61	11.82	11.88	12.63	11.87	12.35	13.1	11.6	12.96	12.2022	0.543523	0.044543	0.024743	0.024743	0.125427	0.125427	0.110576	0.110576	[MJ]	--	Molecular Function: mannose-1-phosphate guanylyltransferase activity (GO:0004475);; Cellular Component: peroxisome (GO:0005777);; Biological Process: biosynthetic process (GO:0009058);; Biological Process: response to cadmium ion (GO:0046686);;	K00966|0|pper:PRUPE_ppa006436mg|hypothetical protein; K00966 mannose-1-phosphate guanylyltransferase [EC:2.7.7.13] (A)	[GMO]	--	Nucleotidyl transferase	Probable mannose-1-phosphate guanylyltransferase 2 OS=Oryza sativa subsp. japonica (Rice) PE=2 SV=1	M	Cell wall/membrane/envelope biogenesis	PREDICTED: mannose-1-phosphate guanyltransferase alpha-like [Fragaria vesca subsp. vesca]	biological process: metabolic process (GO:0008152);; molecular function: catalytic activity (GO:0003824);; cellular component: cell (GO:0005623);; cellular component: organelle (GO:0043226);; cellular component: cell part (GO:0044464);; biological process: response to stimulus (GO:0050896)	Fructose and mannose metabolism (ko00051);; Amino sugar and nucleotide sugar metabolism (ko00520)	2	p1	(T)10	10	1871	1880	ACGCTATTGCTGGATGGAAG	60.235	20	CCAAGTTATGAGAAATGGGGG	60.539	21	259	1742	2000	CGCTATTGCTGGATGGAAGT	60.235	20
c72434.graph_c0	31.75	26.09	23.61	20.45	33.26	27.52	24.82	28.8	28.29	27.1767	3.75083	0.138017	0.0331405	0.0331405	0.124506	0.124506	0.0990978	0.0990978	[RTKL]	--	Molecular Function: protein serine/threonine kinase activity (GO:0004674);; Molecular Function: ATP binding (GO:0005524);; Biological Process: protein phosphorylation (GO:0006468);;	--	[T]	Signal transduction mechanisms	Protein kinase domain;; Protein tyrosine kinase	Probable receptor-like protein kinase At2g42960 GN=At2g42960 OS=Arabidopsis thaliana (Mouse-ear cress) PE=3 SV=1	T	Signal transduction mechanisms	putative receptor-like protein kinase [Morus notabilis]	biological process: metabolic process (GO:0008152);; biological process: cellular process (GO:0009987);; molecular function: catalytic activity (GO:0003824);; molecular function: binding (GO:0005488)	--	--	--	--	--	--	--	--	--	--	--	--	--	--	--	--	--	--	--
c69957.graph_c2	20.14	19.49	20.81	16.47	23.85	18.83	21.45	18.83	19.72	19.9544	1.91831	0.0961345	0.0248928	0.0248928	0.124254	0.124254	0.10665	0.10665	--	--	--	--	--	--	--	Protein SCAR2 GN=T19C21.7 OS=Arabidopsis thaliana (Mouse-ear cress) PE=1 SV=1	S	Function unknown	SCAR, putative isoform 3 [Theobroma cacao]	--	--	--	--	--	--	--	--	--	--	--	--	--	--	--	--	--	--	--	--
c51289.graph_c0	17.58	16.98	14.95	15.64	14.73	16.96	17.43	19.3	17.46	16.7811	1.36621	0.0814134	-0.00262333	0.00262333	0.12419	0.12419	0.137692	0.137692	[E]	Amino acid transport and metabolism	Biological Process: tryptophan biosynthetic process (GO:0000162);; Molecular Function: double-stranded telomeric DNA binding (GO:0003691);; Molecular Function: anthranilate phosphoribosyltransferase activity (GO:0004048);; Molecular Function: protein binding (GO:0005515);; Cellular Component: plasma membrane (GO:0005886);; Biological Process: tryptophan catabolic process (GO:0006569);; Cellular C…	K00766|4.47854e-168|vvi:100255305|anthranilate phosphoribosyltransferase, chloroplastic; K00766 anthranilate phosphoribosyltransferase [EC:2.4.2.18] (A)	[E]	Amino acid transport and metabolism	Glycosyl transferase family, a/b domain;; Glycosyl transferase family, helical bundle domain;; Glutaredoxin;; Glutathione S-transferase, N-terminal domain	Anthranilate phosphoribosyltransferase, chloroplastic (Precursor) GN=PAT1 OS=Arabidopsis thaliana (Mouse-ear cress) PE=2 SV=1	E	Amino acid transport and metabolism	PREDICTED: anthranilate phosphoribosyltransferase, chloroplastic [Vitis vinifera]	biological process: metabolic process (GO:0008152);; biological process: cellular process (GO:0009987);; biological process: single-organism process (GO:0044699);; molecular function: binding (GO:0005488);; molecular function: catalytic activity (GO:0003824);; cellular component: cell (GO:0005623);; cellular component: membrane (GO:0016020);; cellular component: cell part (GO:0044464);; cellular …	Phenylalanine, tyrosine and tryptophan biosynthesis (ko00400);; Biosynthesis of amino acids (ko01230)	--	--	--	--	--	--	--	--	--	--	--	--	--	--	--	--	--	--
c70090.graph_c1	35.06	37.85	35.26	35.29	34.13	35.46	36.63	37.86	31.96	35.5	1.73444	0.0488573	0.0803433	0.0803433	0.12417	0.12417	0.0542176	0.0542176	--	--	Molecular Function: RNA binding (GO:0003723);; Biological Process: response to abscisic acid (GO:0009737);;	K13162|0|vvi:100265365|KH domain-containing protein At4g18375; K13162 poly(rC)-binding protein 2/3/4 (A)	[AR]	--	KH domain;; KH domain;; KH domain;; KH domain;; NusA-like KH domain	KH domain-containing protein At4g18375 GN=At4g18375 OS=Arabidopsis thaliana (Mouse-ear cress) PE=2 SV=1	A	RNA processing and modification	PREDICTED: KH domain-containing protein At4g18375 isoform X1 [Vitis vinifera]	molecular function: binding (GO:0005488);; biological process: response to stimulus (GO:0050896)	--	1	p1	(T)14	14	3602	3615	--	--	--	--	--	--	--	--	--	--	--	--
c62261.graph_c0	57.37	53.86	49.24	59.63	58.36	57.54	58.13	55.47	48.49	55.3433	3.80948	0.0688336	0.194859	0.194859	0.124166	0.124166	-0.0610598	0.0610598	--	--	--	K08494|1.01166e-129|cit:102615453|novel plant SNARE 13-like; K08494 novel plant SNARE (A)	--	--	Sec20	Novel plant SNARE 13 GN=NPSN13 OS=Arabidopsis thaliana (Mouse-ear cress) PE=1 SV=1	S	Function unknown	hypothetical protein CICLE_v10005631mg [Citrus clementina]	--	--	2	p1	(T)10	10	1644	1653	TGTTCAGGTTGTGAATCCGA	60.088	20	TGCACATCTCAGGCAAGAAC	59.992	20	252	1431	1682	TGTTCAGGTTGTGAATCCGA	60.088	20
c70601.graph_c0	17.39	21.16	19.46	16.13	20.06	20.92	16.48	18.98	20.39	18.9967	1.78882	0.0941651	0.100223	0.100223	0.123964	0.123964	0.0340468	0.0340468	[D]	Cell cycle control, cell division, chromosome partitioning	Biological Process: protein import into nucleus, docking (GO:0000059);; Cellular Component: nuclear pore (GO:0005643);; Cellular Component: cytosol (GO:0005829);; Biological Process: gluconeogenesis (GO:0006094);; Biological Process: cytoskeleton organization (GO:0007010);; Molecular Function: Ran GTPase binding (GO:0008536);; Molecular Function: protein transporter activity (GO:0008565);; Cellul…	K18423|0|tcc:TCM_005128|Cellular apoptosis susceptibility protein / importin-alpha re-exporter, putative isoform 1; K18423 exportin-2 (importin alpha re-exporter) (A)	[YU]	--	CAS/CSE protein, C-terminus;; Cse1	Exportin-2 GN=CAS OS=Arabidopsis thaliana (Mouse-ear cress) PE=2 SV=1	Y	Nuclear structure	Exportin-2 -like protein [Gossypium arboreum]	biological process: single-organism process (GO:0044699);; biological process: localization (GO:0051179);; biological process: cellular component organization or biogenesis (GO:0071840);; cellular component: cell (GO:0005623);; cellular component: membrane (GO:0016020);; cellular component: macromolecular complex (GO:0032991);; cellular component: organelle (GO:0043226);; cellular component: orga…	--	--	--	--	--	--	--	--	--	--	--	--	--	--	--	--	--	--	--
c67516.graph_c0	14.74	14.65	11.38	12.12	10.71	10.78	12.46	13.11	11.77	12.4133	1.4158	0.114055	-0.0270142	0.0270142	0.123892	0.123892	0.163003	0.163003	[S]	Function unknown	Molecular Function: oxidoreductase activity (GO:0016491);; Biological Process: oxidation-reduction process (GO:0055114);;	--	--	--	Flavin containing amine oxidoreductase;; NAD(P)-binding Rossmann-like domain;; FAD dependent oxidoreductase;; FAD binding domain;; Pyridine nucleotide-disulphide oxidoreductase	--	R	General function prediction only	hypothetical protein CISIN_1g009508mg [Citrus sinensis]	biological process: metabolic process (GO:0008152);; biological process: single-organism process (GO:0044699);; molecular function: catalytic activity (GO:0003824)	--	1	p1	(T)11	11	2171	2181	TCCACATTGAAGGAACACCA	59.935	20	CAGCAGCCATTTTTGTGAAA	59.849	20	121	2135	2255	ACGGTCCACATTGAAGGAAC	59.827	20
c47311.graph_c0	17.9	17.17	14.81	15.69	15.99	16.51	12.36	13.79	16.39	15.6233	1.62481	0.103999	0.0119496	0.0119496	-0.123888	0.123888	-0.125061	0.125061	--	--	--	--	--	--	--	--	S	Function unknown	PREDICTED: uncharacterized protein LOC105111180 isoform X1 [Populus euphratica]	--	--	--	--	--	--	--	--	--	--	--	--	--	--	--	--	--	--	--	--
c71949.graph_c0	33.22	43.23	44.48	40.57	35.64	32.36	39.16	30.57	34.51	37.0822	4.68242	0.126271	-0.146618	0.146618	-0.123711	0.123711	0.0333287	0.0333287	--	--	--	--	[T]	Signal transduction mechanisms	--	BAG family molecular chaperone regulator 1 GN=BAG1 OS=Arabidopsis thaliana (Mouse-ear cress) PE=1 SV=1	T	Signal transduction mechanisms	PREDICTED: BAG family molecular chaperone regulator 1-like isoform X1 [Pyrus x bretschneideri]	--	--	--	--	--	--	--	--	--	--	--	--	--	--	--	--	--	--	--	--
c63809.graph_c1	35.35	40.44	38.83	40.74	38.34	41.16	46.41	45.66	40.88	40.8678	3.24815	0.0794796	-0.0103052	0.0103052	0.123487	0.123487	0.144303	0.144303	--	--	Molecular Function: nucleotide binding (GO:0000166);; Biological Process: mRNA splicing, via spliceosome (GO:0000398);; Molecular Function: snRNA binding (GO:0017069);;	--	--	--	RNA recognition motif. (a.k.a. RRM, RBD, or RNP domain)	Protein MATERNALLY EXPRESSED GENE 5 GN=MEG5 OS=Zea mays (Maize) PE=2 SV=1	R	General function prediction only	PREDICTED: U2 small nuclear ribonucleoprotein B&apos;&apos; isoform X1 [Vitis vinifera]	molecular function: binding (GO:0005488);; biological process: metabolic process (GO:0008152);; biological process: cellular process (GO:0009987)	--	--	--	--	--	--	--	--	--	--	--	--	--	--	--	--	--	--	--
c60357.graph_c0	7.38	7.85	5.43	6.89	7.89	5.81	5.55	6.59	5.39	6.53111	0.968165	0.148239	0.0413857	0.0413857	-0.123298	0.123298	-0.154935	0.154935	[G]	Carbohydrate transport and metabolism	Molecular Function: hydrolase activity, hydrolyzing O-glycosyl compounds (GO:0004553);; Biological Process: carbohydrate metabolic process (GO:0005975);;	--	--	--	Cellulase (glycosyl hydrolase family 5);; Sugar-binding cellulase-like	Mannan endo-1,4-beta-mannosidase 6 (Precursor) GN=OSJNBb0005N06.19 OS=Oryza sativa subsp. japonica (Rice) PE=2 SV=2	R	General function prediction only	unnamed protein product [Vitis vinifera]	biological process: metabolic process (GO:0008152);; molecular function: catalytic activity (GO:0003824)	--	--	--	--	--	--	--	--	--	--	--	--	--	--	--	--	--	--	--
c71669.graph_c1	13.96	14.25	16.69	14.09	12.92	13.7	12.69	10.68	13.32	13.5889	1.4998	0.110369	-0.0645482	0.0645482	-0.12328	0.12328	-0.0491465	0.0491465	--	--	--	--	--	--	--	Protein FLX-like 1 GN=MIE1.26 OS=Arabidopsis thaliana (Mouse-ear cress) PE=1 SV=1	S	Function unknown	hypothetical protein L484_017501 [Morus notabilis]	--	--	1	p1	(A)12	12	1124	1135	TGAGGTTTATGCAAGGGACA	59.123	20	CTCACTGAGGCTCCTTTTGG	59.982	20	194	1014	1207	TGAGGTTTATGCAAGGGACA	59.123	20
c69758.graph_c0	15.73	12.14	13.66	13.63	14.16	14.43	12.55	11.46	10.91	13.1856	1.45479	0.110332	0.0733941	0.0733941	-0.122949	0.122949	-0.187479	0.187479	--	--	Biological Process: response to hypoxia (GO:0001666);; Cellular Component: endosome (GO:0005768);; Cellular Component: Golgi apparatus (GO:0005794);; Cellular Component: trans-Golgi network (GO:0005802);; Molecular Function: transferase activity, transferring glycosyl groups (GO:0016757);; Biological Process: galactolipid biosynthetic process (GO:0019375);;	--	--	--	Glycosyl transferases group 1	--	S	Function unknown	hypothetical protein PRUPE_ppa000692mg [Prunus persica]	biological process: response to stimulus (GO:0050896);; cellular component: cell (GO:0005623);; cellular component: organelle (GO:0043226);; cellular component: cell part (GO:0044464);; cellular component: organelle part (GO:0044422);; biological process: metabolic process (GO:0008152);; molecular function: catalytic activity (GO:0003824);; biological process: cellular process (GO:0009987);; biol…	--	--	--	--	--	--	--	--	--	--	--	--	--	--	--	--	--	--	--
c72407.graph_c3	42.03	37.58	41.61	37.68	37.92	40.4	38.77	33.05	34.55	38.1767	2.82912	0.074106	0.121841	0.121841	0.122771	0.122771	0.0102118	0.0102118	[RTKL]	--	Molecular Function: protein serine/threonine kinase activity (GO:0004674);; Molecular Function: ATP binding (GO:0005524);; Biological Process: protein phosphorylation (GO:0006468);;	--	[R]	General function prediction only	Protein kinase domain;; Protein tyrosine kinase	Serine/threonine-protein kinase AFC2 GN=AFC2 OS=Arabidopsis thaliana (Mouse-ear cress) PE=1 SV=1	T	Signal transduction mechanisms	PREDICTED: uncharacterized protein LOC103338898 [Prunus mume]	biological process: metabolic process (GO:0008152);; biological process: cellular process (GO:0009987);; molecular function: catalytic activity (GO:0003824);; molecular function: binding (GO:0005488)	--	3	p3	(CAT)6	18	4939	4956	TCCTCATCTTTGGTTGGACC	59.903	20	AGTCAGGGAATTGCAGAGGA	59.803	20	269	4799	5067	TCCTCATCTTTGGTTGGACC	59.903	20
c71654.graph_c1	11.97	16.71	15.34	16.02	12.7	14.69	13.24	15.1	13.1	14.3189	1.5344	0.107159	-0.0984208	0.0984208	-0.122674	0.122674	-0.0115797	0.0115797	[K]	Transcription	Molecular Function: DNA binding (GO:0003677);; Molecular Function: DNA-directed RNA polymerase activity (GO:0003899);; Cellular Component: mitochondrion (GO:0005739);; Biological Process: transcription, DNA-templated (GO:0006351);; Biological Process: embryo development ending in seed dormancy (GO:0009793);; Biological Process: pollen tube growth (GO:0009860);; Biological Process: ovule developme…	K10908|9.15106e-77|pxb:103947300|DNA-directed RNA polymerase 1, mitochondrial-like; K10908 DNA-directed RNA polymerase, mitochondrial [EC:2.7.7.6] (A)	[KL]	--	DNA-dependent RNA polymerase;; DNA-dependent RNA polymerase	DNA-directed RNA polymerase 1A (Fragment) GN=RPOT1-SYL OS=Nicotiana tabacum (Common tobacco) PE=3 SV=2	K	Transcription	PREDICTED: DNA-directed RNA polymerase 1, mitochondrial-like [Pyrus x bretschneideri]	molecular function: binding (GO:0005488);; biological process: metabolic process (GO:0008152);; biological process: cellular process (GO:0009987);; molecular function: catalytic activity (GO:0003824);; cellular component: cell (GO:0005623);; cellular component: organelle (GO:0043226);; cellular component: cell part (GO:0044464);; biological process: reproductive process (GO:0022414);; biological …	--	--	--	--	--	--	--	--	--	--	--	--	--	--	--	--	--	--	--
c60482.graph_c0	9.59	7.3	9.49	10.4	8.25	11.2	10.53	9.19	10.84	9.64333	1.19622	0.124046	0.168345	0.168345	0.122663	0.122663	-0.0352765	0.0352765	--	--	--	--	--	--	PLATZ transcription factor	Uncharacterized protein At3g50808 GN=At3g50808 OS=Arabidopsis thaliana (Mouse-ear cress) PE=4 SV=1	S	Function unknown	hypothetical protein F383_25875 [Gossypium arboreum]	--	--	--	--	--	--	--	--	--	--	--	--	--	--	--	--	--	--	--	--
c66966.graph_c1	13.55	12	11.22	11.18	13.24	10.71	11.51	8.83	10.37	11.4011	1.35822	0.119131	0.0117514	0.0117514	-0.122569	0.122569	-0.126081	0.126081	[A]	RNA processing and modification	Biological Process: cellular process (GO:0009987);;	K14405|3.22883e-108|vvi:100258583|FIP1[III]-like protein; K14405 pre-mRNA 3'-end-processing factor FIP1 (A)	[A]	RNA processing and modification	Fip1 motif	FIP1[V]-like protein {ECO:0000303|PubMed:16282318} OS=Arabidopsis thaliana (Mouse-ear cress) PE=1 SV=1	A	RNA processing and modification	PREDICTED: FIP1[III]-like protein [Vitis vinifera]	biological process: cellular process (GO:0009987)	mRNA surveillance pathway (ko03015)	--	--	--	--	--	--	--	--	--	--	--	--	--	--	--	--	--	--
c57415.graph_c0	29.84	31.22	31.02	27.03	31.68	33.52	32.71	32.15	29.02	30.91	1.88745	0.0610628	0.0252244	0.0252244	0.122398	0.122398	0.106629	0.106629	[R]	General function prediction only	Molecular Function: nucleotide binding (GO:0000166);; Cellular Component: nucleus (GO:0005634);; Molecular Function: poly(A) binding (GO:0008143);; Biological Process: vernalization response (GO:0010048);;	--	[R]	General function prediction only	RNA recognition motif. (a.k.a. RRM, RBD, or RNP domain);; RNA recognition motif (a.k.a. RRM, RBD, or RNP domain);; RNA recognition motif. (a.k.a. RRM, RBD, or RNP domain);; RNA binding motif	Polyadenylate-binding protein RBP47B&apos; GN=RBP47B&apos; OS=Arabidopsis thaliana (Mouse-ear cress) PE=2 SV=1	A	RNA processing and modification	PREDICTED: polyadenylate-binding protein RBP47B&apos;-like [Malus domestica]	molecular function: binding (GO:0005488);; cellular component: cell (GO:0005623);; cellular component: organelle (GO:0043226);; cellular component: cell part (GO:0044464);; biological process: response to stimulus (GO:0050896)	--	--	--	--	--	--	--	--	--	--	--	--	--	--	--	--	--	--	--
c63287.graph_c0	30.18	29.38	23.95	25.93	25.15	21.06	24.8	24.62	21.57	25.1822	2.89023	0.114773	-0.17	0.17	-0.122372	0.122372	0.0576945	0.0576945	[RTKL]	--	--	--	[R]	General function prediction only	Protein kinase domain;; Protein tyrosine kinase;; Protein kinase domain;; Protein tyrosine kinase;; Protein kinase domain;; Protein tyrosine kinase	Serine/threonine-protein kinase STN8, chloroplastic (Precursor) GN=STN8 OS=Arabidopsis thaliana (Mouse-ear cress) PE=2 SV=1	T	Signal transduction mechanisms	PREDICTED: serine/threonine-protein kinase STN8, chloroplastic isoform X1 [Vitis vinifera]	--	--	1	p1	(T)12	12	2482	2493	GGGACGTGTCATTGCTAGGT	59.997	20	AGTTCGGTAAGGCCTTCGTT	60.13	20	180	2363	2542	GGGACGTGTCATTGCTAGGT	59.997	20
c69353.graph_c1	53.14	45.77	51.86	46.64	49.62	42.78	48.27	44.03	43.17	47.2533	3.53018	0.0747076	0.0853393	0.0853393	0.122221	0.122221	0.0455977	0.0455977	[IR]	--	Molecular Function: diacylglycerol kinase activity (GO:0004143);; Cellular Component: plasma membrane (GO:0005886);; Biological Process: protein kinase C-activating G-protein coupled receptor signaling pathway (GO:0007205);; Biological Process: phosphorylation (GO:0016310);; Biological Process: root development (GO:0048364);; Biological Process: leaf development (GO:0048366);;	K00901|0|cit:102618604|diacylglycerol kinase 7-like; K00901 diacylglycerol kinase (ATP) [EC:2.7.1.107] (A)	[IT]	--	Diacylglycerol kinase catalytic domain;; Diacylglycerol kinase accessory domain;; Diacylglycerol kinase accessory domain	Diacylglycerol kinase 7 GN=DGK7 OS=Arabidopsis thaliana (Mouse-ear cress) PE=1 SV=1	T	Signal transduction mechanisms	hypothetical protein CICLE_v10008147mg [Citrus clementina]	biological process: metabolic process (GO:0008152);; biological process: cellular process (GO:0009987);; molecular function: catalytic activity (GO:0003824);; cellular component: cell (GO:0005623);; cellular component: membrane (GO:0016020);; cellular component: cell part (GO:0044464);; biological process: signaling (GO:0023052);; biological process: single-organism process (GO:0044699);; biologi…	Glycerolipid metabolism (ko00561);; Glycerophospholipid metabolism (ko00564);; Phosphatidylinositol signaling system (ko04070)	1	p2	(TA)7	14	3072	3085	GGGCTAAAGGCAAAGTCAGA	59.452	20	AAAATCCTCACCACAACGCT	59.598	20	256	2960	3215	GGGCTAAAGGCAAAGTCAGA	59.452	20
c72072.graph_c0	29	27.29	25.83	29.85	27.61	31.41	25.96	25.91	31.19	28.2278	2.09906	0.0743616	-0.0458801	0.0458801	-0.122194	0.122194	-0.0660131	0.0660131	--	--	--	--	[R]	General function prediction only	PPR repeat family;; PPR repeat;; PPR repeat;; Pentatricopeptide repeat domain	Pentatricopeptide repeat-containing protein At1g20300, mitochondrial (Precursor) GN=At1g20300 OS=Arabidopsis thaliana (Mouse-ear cress) PE=2 SV=1	R	General function prediction only	unnamed protein product [Vitis vinifera]	--	--	--	--	--	--	--	--	--	--	--	--	--	--	--	--	--	--	--	--
c72191.graph_c0	34.48	30.54	33.85	37.84	29.09	32.84	36.8	31.48	35.19	33.5678	2.71516	0.080886	-0.0166119	0.0166119	0.12212	0.12212	0.148812	0.148812	--	--	--	--	--	--	--	--	--	--	--	--	--	--	--	--	--	--	--	--	--	--	--	--	--	--	--	--	--	--	--
c32886.graph_c0	21.58	21.23	23.1	21.08	17.82	26.76	16.65	28.8	23.05	22.23	3.62774	0.163191	0.043356	0.043356	0.122094	0.122094	0.0913761	0.0913761	--	--	Molecular Function: RNA binding (GO:0003723);; Molecular Function: structural constituent of ribosome (GO:0003735);; Cellular Component: ribosome (GO:0005840);; Biological Process: pentose-phosphate shunt (GO:0006098);; Biological Process: rRNA processing (GO:0006364);; Biological Process: translation (GO:0006412);; Cellular Component: chloroplast stroma (GO:0009570);; Cellular Component: thylako…	K02945|1.02456e-45|pmum:103323230|30S ribosomal protein S1, chloroplastic; K02945 small subunit ribosomal protein S1 (A)	--	--	--	30S ribosomal protein S1, chloroplastic (Precursor) GN=RPS1 OS=Spinacia oleracea (Spinach) PE=1 SV=1	J	Translation, ribosomal structure and biogenesis	PREDICTED: 30S ribosomal protein S1, chloroplastic [Prunus mume]	molecular function: binding (GO:0005488);; molecular function: structural molecule activity (GO:0005198);; cellular component: cell (GO:0005623);; cellular component: macromolecular complex (GO:0032991);; cellular component: organelle (GO:0043226);; cellular component: cell part (GO:0044464);; biological process: metabolic process (GO:0008152);; biological process: cellular process (GO:0009987);;…	Ribosome (ko03010)	--	--	--	--	--	--	--	--	--	--	--	--	--	--	--	--	--	--
c63695.graph_c0	28.83	41.77	37.06	32.17	28.99	31.54	29.78	30.82	31.31	32.4744	4.01631	0.123676	-0.162696	0.162696	-0.122025	0.122025	0.0524314	0.0524314	--	--	--	--	[R]	General function prediction only	PPR repeat family;; PPR repeat;; PPR repeat;; Pentatricopeptide repeat domain;; Tetratricopeptide repeat	Pentatricopeptide repeat-containing protein At1g10270 GN=GRP23 OS=Arabidopsis thaliana (Mouse-ear cress) PE=1 SV=1	R	General function prediction only	PREDICTED: pentatricopeptide repeat-containing protein At1g10270-like [Cucumis sativus]	--	--	--	--	--	--	--	--	--	--	--	--	--	--	--	--	--	--	--	--
c66291.graph_c2	25.56	20.34	18.43	19.54	20.74	23.89	20.39	16.83	18.62	20.4822	2.569	0.125426	0.0240379	0.0240379	-0.121471	0.121471	-0.136629	0.136629	--	--	Molecular Function: voltage-gated potassium channel activity (GO:0005249);; Biological Process: potassium ion transport (GO:0006813);; Cellular Component: voltage-gated potassium channel complex (GO:0008076);; Biological Process: protein homooligomerization (GO:0051260);;	--	[R]	General function prediction only	BTB/POZ domain;; Pentapeptide repeats (8 copies);; Pentapeptide repeats (9 copies);; Pentapeptide repeats (9 copies)	FH protein interacting protein FIP2 GN=FIP2 OS=Arabidopsis thaliana (Mouse-ear cress) PE=1 SV=1	R	General function prediction only	BTB/POZ domain-containing protein KCTD9, putative [Ricinus communis]	biological process: cellular process (GO:0009987);; biological process: single-organism process (GO:0044699);; biological process: localization (GO:0051179);; biological process: biological regulation (GO:0065007);; molecular function: transporter activity (GO:0005215);; cellular component: cell (GO:0005623);; cellular component: membrane (GO:0016020);; cellular component: macromolecular complex …	--	--	--	--	--	--	--	--	--	--	--	--	--	--	--	--	--	--	--
c69724.graph_c0	5.76	8.57	6.19	8	7.31	7.28	7.23	6.8	7.1	7.13778	0.800358	0.11213	0.0650736	0.0650736	0.121373	0.121373	0.0670374	0.0670374	--	--	--	--	[S]	Function unknown	Vitamin B6 photo-protection and homoeostasis;; Vitamin B6 photo-protection and homoeostasis;; Vitamin B6 photo-protection and homoeostasis	Protein root UVB sensitive 5 {ECO:0000303|PubMed:19515790} OS=Arabidopsis thaliana (Mouse-ear cress) PE=2 SV=1	S	Function unknown	hypothetical protein CICLE_v10013484mg [Citrus clementina]	--	--	--	--	--	--	--	--	--	--	--	--	--	--	--	--	--	--	--	--
c69314.graph_c0	20.09	17.63	15.9	21.89	19.69	18.94	16.86	17.37	17.59	18.44	1.76097	0.0954971	0.052308	0.052308	-0.120934	0.120934	-0.163168	0.163168	--	--	--	--	--	--	--	--	--	--	--	--	--	--	--	--	--	--	--	--	--	--	--	--	--	--	--	--	--	--	--
c64446.graph_c0	11.86	10.51	10.38	12.63	9.35	10.99	10.29	8.53	8.58	10.3467	1.30654	0.126276	0.0774216	0.0774216	-0.120769	0.120769	-0.187219	0.187219	[LKJ]	--	Molecular Function: nucleic acid binding (GO:0003676);; Molecular Function: ATP binding (GO:0005524);; Biological Process: protein import into nucleus (GO:0006606);; Molecular Function: ATP-dependent helicase activity (GO:0008026);;	K14810|0|vvi:100263736|DEAD-box ATP-dependent RNA helicase 16; K14810 ATP-dependent RNA helicase DDX56/DBP9 [EC:3.6.4.13] (A)	[A]	RNA processing and modification	DEAD/DEAH box helicase;; Helicase conserved C-terminal domain	DEAD-box ATP-dependent RNA helicase 16 GN=RH16 OS=Arabidopsis thaliana (Mouse-ear cress) PE=2 SV=1	A	RNA processing and modification	PREDICTED: DEAD-box ATP-dependent RNA helicase 16-like [Vitis vinifera]	molecular function: binding (GO:0005488);; biological process: single-organism process (GO:0044699);; biological process: localization (GO:0051179);; biological process: metabolic process (GO:0008152);; biological process: cellular process (GO:0009987);; molecular function: catalytic activity (GO:0003824)	--	--	--	--	--	--	--	--	--	--	--	--	--	--	--	--	--	--	--
c72632.graph_c2	64.77	70.39	73.62	64.05	64.66	62.08	70.39	67.96	62.91	66.7589	3.7608	0.0563341	0.03	0.03	0.120642	0.120642	0.100184	0.100184	--	--	Molecular Function: binding (GO:0005488);; Cellular Component: cell wall (GO:0005618);; Cellular Component: vacuole (GO:0005773);; Biological Process: carbohydrate metabolic process (GO:0005975);; Biological Process: cellular process (GO:0009987);; Molecular Function: mannosidase activity (GO:0015923);;	K01191|0|tcc:TCM_046752|Glycosyl hydrolase family 38 protein; K01191 alpha-mannosidase [EC:3.2.1.24] (A)	[G]	Carbohydrate transport and metabolism	Alpha mannosidase, middle domain;; Glycosyl hydrolases family 38 N-terminal domain	Alpha-mannosidase, light subunit {ECO:0000303|PubMed:24221485} OS=Canavalia ensiformis (Jack bean) PE=1 SV=1	G	Carbohydrate transport and metabolism	Glycosyl hydrolase family 38 protein [Theobroma cacao]	molecular function: binding (GO:0005488);; cellular component: cell (GO:0005623);; cellular component: cell part (GO:0044464);; cellular component: organelle (GO:0043226);; biological process: metabolic process (GO:0008152);; biological process: cellular process (GO:0009987);; molecular function: catalytic activity (GO:0003824)	Other glycan degradation (ko00511)	4	p1	(A)11	11	3383	3393	TGGGACTGGAGTTGTTTCAA	59.109	20	GTGGAGAGATGAGAGCGAGG	60.096	20	173	3343	3515	TGGGACTGGAGTTGTTTCAA	59.109	20
c64777.graph_c0	24.08	16.73	13.82	18.32	18.52	16.93	16.7	17.17	12.29	17.1733	3.09842	0.180421	0.0290558	0.0290558	-0.119998	0.119998	-0.139912	0.139912	--	--	--	K16585|7.73665e-116|tcc:TCM_002165|Uncharacterized protein isoform 1; K16585 HAUS augmin-like complex subunit 2 (A)	--	--	HAUS augmin-like complex subunit 2;; HAUS augmin-like complex subunit 2	--	S	Function unknown	PREDICTED: uncharacterized protein LOC104224844 [Nicotiana sylvestris]	--	--	1	p1	(T)14	14	176	189	GGGTCTACTTCCCCACTACCA	60.232	21	TTGGCCTCCCTCAGTTAAGA	59.807	20	260	1	260	TGGGTCTACTTCCCCACTACC	60.232	21
c66411.graph_c0	51.16	47.02	49.24	49.95	55.53	55.7	53.03	50.04	50.74	51.3789	2.71815	0.052904	0.107611	0.107611	0.119878	0.119878	0.021989	0.021989	[L]	Replication, recombination and repair	Molecular Function: chromatin binding (GO:0003682);; Molecular Function: RNA binding (GO:0003723);; Molecular Function: RNA-directed DNA polymerase activity (GO:0003964);; Molecular Function: aspartic-type endopeptidase activity (GO:0004190);; Biological Process: RNA-dependent DNA replication (GO:0006278);; Biological Process: DNA recombination (GO:0006310);; Biological Process: chromatin assembl…	--	[R]	General function prediction only	--	Uncharacterized mitochondrial protein AtMg00860 GN=AtMg00860 OS=Arabidopsis thaliana (Mouse-ear cress) PE=4 SV=1	R	General function prediction only	OSIGBa0114M03.4 [Oryza sativa Indica Group]	molecular function: binding (GO:0005488);; biological process: metabolic process (GO:0008152);; biological process: cellular process (GO:0009987);; molecular function: catalytic activity (GO:0003824);; biological process: cellular component organization or biogenesis (GO:0071840)	--	1	p1	(A)14	14	1944	1957	GTTGTAGAAGACCGGCAGGA	60.255	20	CCATGATGATGAAGCTGTGG	60.072	20	279	1722	2000	GTTGTAGAAGACCGGCAGGA	60.255	20
c51405.graph_c0	40.83	41.27	52.42	44.89	37.35	43.88	47.97	42.88	44.2	43.9656	4.0889	0.0930023	-0.052435	0.052435	0.119681	0.119681	0.18255	0.18255	[LKJ]	--	Molecular Function: nucleic acid binding (GO:0003676);; Molecular Function: ATP binding (GO:0005524);; Molecular Function: ATP-dependent helicase activity (GO:0008026);; Molecular Function: zinc ion binding (GO:0008270);;	K13116|0|cmo:103499818|DEAD-box ATP-dependent RNA helicase 35; K13116 ATP-dependent RNA helicase DDX41 [EC:3.6.4.13] (A)	[A]	RNA processing and modification	DEAD/DEAH box helicase;; Helicase conserved C-terminal domain	DEAD-box ATP-dependent RNA helicase 35 GN=RH35 OS=Arabidopsis thaliana (Mouse-ear cress) PE=2 SV=1	A	RNA processing and modification	PREDICTED: DEAD-box ATP-dependent RNA helicase 35 [Cucumis melo]	molecular function: binding (GO:0005488);; biological process: metabolic process (GO:0008152);; biological process: cellular process (GO:0009987);; biological process: single-organism process (GO:0044699);; molecular function: catalytic activity (GO:0003824)	--	--	--	--	--	--	--	--	--	--	--	--	--	--	--	--	--	--	--
c67433.graph_c0	19.24	24.14	28.69	25.78	23.43	25.55	25.25	24.76	25.09	24.6589	2.35679	0.0955756	0.0139083	0.0139083	0.11968	0.11968	0.116291	0.116291	[O]	Posttranslational modification, protein turnover, chaperones	Molecular Function: arginyltransferase activity (GO:0004057);; Molecular Function: arginine-tRNA ligase activity (GO:0004814);; Molecular Function: ATP binding (GO:0005524);; Cellular Component: cytoplasm (GO:0005737);; Biological Process: arginyl-tRNA aminoacylation (GO:0006420);; Biological Process: protein arginylation (GO:0016598);;	K00685|0|pper:PRUPE_ppa002749mg|hypothetical protein; K00685 arginine-tRNA-protein transferase [EC:2.3.2.8] (A)	[O]	Posttranslational modification, protein turnover, chaperones	Arginine-tRNA-protein transferase, C terminus	Arginyl-tRNA--protein transferase 1 GN=ATE1 OS=Arabidopsis thaliana (Mouse-ear cress) PE=2 SV=2	O	Posttranslational modification, protein turnover, chaperones	hypothetical protein JCGZ_01283 [Jatropha curcas]	biological process: metabolic process (GO:0008152);; molecular function: catalytic activity (GO:0003824);; molecular function: binding (GO:0005488);; cellular component: cell (GO:0005623);; cellular component: cell part (GO:0044464);; biological process: cellular process (GO:0009987);; biological process: single-organism process (GO:0044699)	--	2	p1	(T)11	11	4066	4076	CGTTACCAATGCTGACATGG	59.988	20	TCAATCAAGTAGCGCAGTGG	60.011	20	240	3909	4148	TTCCGTTACCAATGCTGACA	60.111	20
c55674.graph_c0	71.86	71.18	78.58	73.12	77.96	77.27	77.84	68.75	75.72	74.6978	3.35893	0.0449669	0.0863671	0.0863671	0.119644	0.119644	0.0425999	0.0425999	--	--	Cellular Component: intracellular (GO:0005622);; Biological Process: intracellular protein transport (GO:0006886);;	--	[U]	Intracellular trafficking, secretion, and vesicular transport	VHS domain;; GAT domain	--	U	Intracellular trafficking, secretion, and vesicular transport	PREDICTED: TOM1-like protein 2 [Vitis vinifera]	cellular component: cell (GO:0005623);; cellular component: cell part (GO:0044464);; biological process: localization (GO:0051179)	--	1	p1	(A)10	10	1892	1901	TTTGCTGTTTGGTTGCAGAG	60.027	20	TCATGTTTCTTTTGGGAGGG	59.903	20	253	1690	1942	CTTTGCTGTTTGGTTGCAGA	60.027	20
c66206.graph_c0	10.05	10.44	6.5	7.61	9.28	7.7	8.74	8.44	6.3	8.34	1.3694	0.164197	-0.0881837	0.0881837	-0.119517	0.119517	-0.0215763	0.0215763	[V]	Defense mechanisms	Molecular Function: metal ion binding (GO:0046872);;	K10638|0|pper:PRUPE_ppa015406mg|hypothetical protein; K10638 E3 ubiquitin-protein ligase UHRF1 [EC:6.3.2.19] (A)	--	--	SAD/SRA domain;; Ring finger domain;; zinc finger of C3HC4-type, RING;; Zinc finger, C3HC4 type (RING finger);; Zinc finger, C3HC4 type (RING finger);; RING-type zinc-finger;; Zinc finger, C3HC4 type (RING finger);; zinc-RING finger domain;; PHD-finger;; Glycine cleavage system P-protein	E3 ubiquitin-protein ligase ORTHRUS 2 GN=F12K22.14 OS=Arabidopsis thaliana (Mouse-ear cress) PE=1 SV=1	K	Transcription	hypothetical protein PRUPE_ppa015406mg, partial [Prunus persica]	molecular function: binding (GO:0005488)	--	1	p1	(T)15	15	3246	3260	TTGATGCTCAGTCACTTGCC	59.992	20	AGCAATTGGGTTCAAGATGG	59.933	20	208	3128	3335	TCTGCCCTTTTCTTCCTTGA	59.926	20
c72786.graph_c0	13.4	13.54	13.27	11.58	13.25	14.01	11.93	12.45	10.26	12.6322	1.12354	0.0889427	-0.0158237	0.0158237	-0.119508	0.119508	-0.0943435	0.0943435	[QR]	--	Molecular Function: protein serine/threonine kinase activity (GO:0004674);; Molecular Function: ATP binding (GO:0005524);; Biological Process: protein phosphorylation (GO:0006468);; Biological Process: response to stress (GO:0006950);;	--	[T]	Signal transduction mechanisms	Protein tyrosine kinase	Serine/threonine-protein kinase GN=PUB51 OS=Arabidopsis thaliana (Mouse-ear cress) PE=2 SV=2	T	Signal transduction mechanisms	Kinase protein with adenine nucleotide alpha hydrolases-like domain, putative isoform 1 [Theobroma cacao]	biological process: metabolic process (GO:0008152);; biological process: cellular process (GO:0009987);; molecular function: catalytic activity (GO:0003824);; molecular function: binding (GO:0005488);; biological process: response to stimulus (GO:0050896)	--	1	p1	(T)14	14	1986	1999	ACAGACTTCAAGAGCCGCTG	60.733	20	ATTCAAGTGGCTTGGCTCAT	59.7	20	254	1860	2113	CGCTGCTTTGTTCTCACATT	59.076	20
c66734.graph_c0	9.8	7.83	5.03	8.24	7.03	9.32	6.51	8.02	7.84	7.73556	1.35185	0.174758	0.189374	0.189374	0.119096	0.119096	-0.0589151	0.0589151	--	--	Cellular Component: cytoplasm (GO:0005737);; Cellular Component: COP9 signalosome (GO:0008180);;	K12180|4.97817e-12|tcc:TCM_005708|Proteasome component (PCI) domain protein isoform 1; K12180 COP9 signalosome complex subunit 7 (A)	[OT]	--	--	COP9 signalosome complex subunit 7 OS=Arabidopsis thaliana (Mouse-ear cress) PE=1 SV=1	T	Signal transduction mechanisms	hypothetical protein [Cucumis melo subsp. melo]	cellular component: cell (GO:0005623);; cellular component: cell part (GO:0044464);; cellular component: macromolecular complex (GO:0032991);; cellular component: organelle (GO:0043226);; cellular component: organelle part (GO:0044422)	--	--	--	--	--	--	--	--	--	--	--	--	--	--	--	--	--	--	--
c68449.graph_c0	22.74	18.06	21.77	19.69	19.29	20.15	22.59	19.2	20.01	20.3889	1.52803	0.0749443	-0.0069914	0.0069914	0.118636	0.118636	0.134935	0.134935	--	--	--	--	--	--	SAM domain (Sterile alpha motif);; SAM domain (Sterile alpha motif);; zinc-binding in reverse transcriptase	--	R	General function prediction only	hypothetical protein CICLE_v10012555mg [Citrus clementina]	--	--	1	p1	(T)11	11	1207	1217	GCTCTACGTCAAAGTAGCTGATTG	59.644	24	TGGCCATGATAGTCTACGGA	59.101	20	193	1149	1341	CGTCAAAGTAGCTGATTGAATG	57.601	22
c57206.graph_c0	11.58	13.14	14.96	13.81	13.16	12.32	9.91	11	12.28	12.4622	1.43315	0.115	0.059579	0.059579	-0.118539	0.118539	-0.16799	0.16799	--	--	Molecular Function: hydrolase activity (GO:0016787);;	K11855|0|vvi:100853437|ubiquitin carboxyl-terminal hydrolase 17-like; K11855 ubiquitin carboxyl-terminal hydrolase 36/42 [EC:3.4.19.12] (A)	[O]	Posttranslational modification, protein turnover, chaperones	Ubiquitin carboxyl-terminal hydrolase;; Ubiquitin carboxyl-terminal hydrolase;; MYND finger	Ubiquitin carboxyl-terminal hydrolase 17 GN=UBP17 OS=Arabidopsis thaliana (Mouse-ear cress) PE=2 SV=1	O	Posttranslational modification, protein turnover, chaperones	PREDICTED: ubiquitin carboxyl-terminal hydrolase 17-like [Vitis vinifera]	biological process: metabolic process (GO:0008152);; molecular function: catalytic activity (GO:0003824)	--	--	--	--	--	--	--	--	--	--	--	--	--	--	--	--	--	--	--
c62384.graph_c1	10.18	8.51	9.56	9.76	10.25	10.61	11.42	8.33	8.64	9.69556	0.986522	0.10175	0.188941	0.188941	0.118496	0.118496	-0.0617889	0.0617889	--	--	--	--	[S]	Function unknown	Putative serine esterase (DUF676)	--	S	Function unknown	hypothetical protein VITISV_025317 [Vitis vinifera]	--	--	--	--	--	--	--	--	--	--	--	--	--	--	--	--	--	--	--	--
c36652.graph_c1	15.14	21.36	19.82	12.11	19.7	15.85	17.26	14.2	17.39	16.9811	2.80877	0.165406	-0.198323	0.198323	-0.118449	0.118449	0.0879505	0.0879505	--	--	Biological Process: gene expression (GO:0010467);; Biological Process: cellular macromolecule biosynthetic process (GO:0034645);; Biological Process: primary metabolic process (GO:0044238);;	K03129|1.95409e-52|vvi:100252311|transcription initiation factor TFIID subunit 4b-like; K03129 transcription initiation factor TFIID subunit 4 (A)	[K]	Transcription	--	Transcription initiation factor TFIID subunit 4b GN=TAF4B OS=Arabidopsis thaliana (Mouse-ear cress) PE=1 SV=1	K	Transcription	unnamed protein product [Vitis vinifera]	biological process: metabolic process (GO:0008152);; biological process: cellular process (GO:0009987)	Basal transcription factors (ko03022)	--	--	--	--	--	--	--	--	--	--	--	--	--	--	--	--	--	--
c64493.graph_c0	442.55	383.22	558.84	335.93	585.88	491.17	313.54	422.25	457.27	443.406	87.2954	0.196875	0.0607167	0.0607167	-0.118327	0.118327	-0.17192	0.17192	--	--	Cellular Component: plasma membrane (GO:0005886);;	K18635|5.85578e-42|rcu:RCOM_1620370|SP1L, putative; K18635 protein SPIRAL1 and related proteins (A)	--	--	--	Protein SPIRAL1-like 1 GN=SP1L1 OS=Arabidopsis thaliana (Mouse-ear cress) PE=2 SV=1	S	Function unknown	hypothetical protein L484_026438 [Morus notabilis]	cellular component: cell (GO:0005623);; cellular component: membrane (GO:0016020);; cellular component: cell part (GO:0044464)	--	--	--	--	--	--	--	--	--	--	--	--	--	--	--	--	--	--	--
c68130.graph_c1	54.74	42.84	51.27	53.54	47.96	49.47	55.23	48.31	51.3	50.5178	3.67886	0.0728232	0.0164364	0.0164364	0.118012	0.118012	0.110854	0.110854	[TDK]	--	--	K03115|8.87659e-89|fve:101304386|casein kinase II subunit beta-like isoform 1; K03115 casein kinase II subunit beta (A)	[TDK]	--	Casein kinase II regulatory subunit	Casein kinase II subunit beta&apos; GN=CKB2 OS=Arabidopsis thaliana (Mouse-ear cress) PE=1 SV=1	T	Signal transduction mechanisms	PREDICTED: casein kinase II subunit beta-like isoform 1 [Fragaria vesca subsp. vesca]	--	Ribosome biogenesis in eukaryotes (ko03008);; Circadian rhythm - plant (ko04712)	4	p1	(T)10	10	5820	5829	CCCCCTTTTTCCAAATGAGT	60.159	20	CGGTTGAATTGCACAAACAG	60.149	20	247	5637	5883	ATCCTCATCAAAGCTGTGGC	60.226	20
c59403.graph_c0	18.36	18.3	17.21	14.74	19.09	15.09	13.3	18.2	14.36	16.5167	2.01948	0.122269	-0.089514	0.089514	-0.117595	0.117595	-0.0186903	0.0186903	[L]	Replication, recombination and repair	Molecular Function: single-stranded DNA binding (GO:0003697);; Biological Process: DNA replication (GO:0006260);;	K03111|1.59726e-65|cic:CICLE_v10022157mg|hypothetical protein; K03111 single-strand DNA-binding protein (A)	[L]	Replication, recombination and repair	Single-strand binding protein family	Single-stranded DNA-binding protein, mitochondrial (Precursor) GN=At4g11060 OS=Arabidopsis thaliana (Mouse-ear cress) PE=2 SV=1	L	Replication, recombination and repair	hypothetical protein CISIN_1g027819mg [Citrus sinensis]	molecular function: binding (GO:0005488);; biological process: metabolic process (GO:0008152);; biological process: cellular process (GO:0009987)	DNA replication (ko03030);; Mismatch repair (ko03430);; Homologous recombination (ko03440)	1	p1	(T)10	10	955	964	AGTAACAGGTCCAAGTGCCG	60.171	20	TGCTTCCGTCATAGTTCACG	59.864	20	139	926	1064	AAGGGCCACTCTGCTTACCT	60.268	20
c70069.graph_c3	53.42	42.51	37.88	51	45.13	37.78	51.94	50.49	46.87	46.3356	5.59448	0.120738	0.0986234	0.0986234	0.117567	0.117567	0.028341	0.028341	--	--	--	--	--	--	Helix-loop-helix DNA-binding domain	Transcription factor bHLH63 GN=T4L20.110 OS=Arabidopsis thaliana (Mouse-ear cress) PE=1 SV=1	K	Transcription	PREDICTED: transcription factor bHLH63 [Vitis vinifera]	--	--	2	p2	(AC)6	12	2404	2415	AGCCAGCCTCAACAAACAAT	59.74	20	CCTAACTGGTTGGCCATCAT	59.813	20	227	2358	2584	CAATCCTCAGGGGAAAGGTT	60.298	20
c64506.graph_c0	28.19	22.64	16.47	24.89	20.16	20.07	19.72	22.69	26.49	22.3689	3.48615	0.155848	-0.0475696	0.0475696	0.117355	0.117355	0.177061	0.177061	[C]	Energy production and conversion	Molecular Function: iron-sulfur cluster binding (GO:0051536);;	--	--	--	Iron-Sulfur binding protein C terminal;; 4Fe-4S binding domain;; 4Fe-4S dicluster domain;; 4Fe-4S dicluster domain;; 4Fe-4S binding domain	--	S	Function unknown	hypothetical protein JCGZ_18993 [Jatropha curcas]	molecular function: binding (GO:0005488)	--	1	p1	(A)10	10	1467	1476	ACTTCCAACCATTGGGAACC	60.979	20	AAGTGTCCAACCAGAATGCC	59.973	20	149	1418	1566	ACTTCCAACCATTGGGAACC	60.979	20
c24774.graph_c0	18.98	19.26	20.24	18.44	16.96	17.44	16.96	17.29	16.48	18.0056	1.20417	0.0668777	-0.100255	0.100255	-0.116582	0.116582	-0.00581957	0.00581957	[RTKL]	--	Biological Process: MAPK cascade (GO:0000165);; Molecular Function: MAP kinase activity (GO:0004707);; Molecular Function: ATP binding (GO:0005524);; Biological Process: protein phosphorylation (GO:0006468);; Biological Process: cell cycle (GO:0007049);;	K14512|3.56687e-32|tcc:TCM_019832|Mitogen-activated protein kinase 6; K14512 mitogen-activated protein kinase 6 [EC:2.7.11.24] (A)	[T]	Signal transduction mechanisms	--	Mitogen-activated protein kinase homolog D5 OS=Pisum sativum (Garden pea) PE=2 SV=1	T	Signal transduction mechanisms	mitogen-activated protein kinase 6 [Betula platyphylla]	biological process: metabolic process (GO:0008152);; biological process: cellular process (GO:0009987);; biological process: signaling (GO:0023052);; biological process: single-organism process (GO:0044699);; biological process: response to stimulus (GO:0050896);; biological process: biological regulation (GO:0065007);; molecular function: catalytic activity (GO:0003824);; molecular function: mol…	Plant hormone signal transduction (ko04075)	--	--	--	--	--	--	--	--	--	--	--	--	--	--	--	--	--	--
c67095.graph_c0	9.25	7.97	8.83	10.54	8.52	10.6	12.04	8.37	9.35	9.49667	1.24075	0.130651	-0.148041	0.148041	-0.116548	0.116548	0.0414004	0.0414004	--	--	--	--	--	--	--	--	S	Function unknown	hypothetical protein CISIN_1g036476mg [Citrus sinensis]	--	--	--	--	--	--	--	--	--	--	--	--	--	--	--	--	--	--	--	--
c73000.graph_c0	30.56	24.37	29.43	25.14	21.09	29.02	24.04	26.57	21.9	25.7911	3.15819	0.122453	-0.117485	0.117485	-0.116505	0.116505	0.0117173	0.0117173	--	--	Cellular Component: chloroplast thylakoid membrane (GO:0009535);; Cellular Component: chloroplast outer membrane (GO:0009707);;	--	--	--	--	--	S	Function unknown	hypothetical protein PRUPE_ppa013015mg [Prunus persica]	cellular component: cell (GO:0005623);; cellular component: membrane (GO:0016020);; cellular component: organelle (GO:0043226);; cellular component: organelle part (GO:0044422);; cellular component: cell part (GO:0044464)	--	--	--	--	--	--	--	--	--	--	--	--	--	--	--	--	--	--	--
c65519.graph_c1	128.76	110.64	92.74	110.24	104.28	114.74	118.61	107.63	112.42	111.118	9.30865	0.0837728	0.0157428	0.0157428	0.116214	0.116214	0.110731	0.110731	[O]	Posttranslational modification, protein turnover, chaperones	Molecular Function: threonine-type endopeptidase activity (GO:0004298);; Cellular Component: nucleus (GO:0005634);; Biological Process: ubiquitin-dependent protein catabolic process (GO:0006511);; Biological Process: response to zinc ion (GO:0010043);; Cellular Component: proteasome core complex, alpha-subunit complex (GO:0019773);; Cellular Component: cytosolic ribosome (GO:0022626);; Biological…	K02726|3.59177e-117|csv:101218236|proteasome subunit alpha type-2-B-like; K02726 20S proteasome subunit alpha 2 [EC:3.4.25.1] (A)	[O]	Posttranslational modification, protein turnover, chaperones	Proteasome subunit;; Proteasome subunit A N-terminal signature	Proteasome subunit alpha type-2 GN=OSJNBb0058G04.11 OS=Oryza sativa subsp. japonica (Rice) PE=2 SV=1	O	Posttranslational modification, protein turnover, chaperones	PREDICTED: proteasome subunit alpha type-2-B-like [Cucumis sativus]	biological process: metabolic process (GO:0008152);; molecular function: catalytic activity (GO:0003824);; cellular component: cell (GO:0005623);; cellular component: organelle (GO:0043226);; cellular component: cell part (GO:0044464);; biological process: cellular process (GO:0009987);; biological process: response to stimulus (GO:0050896);; cellular component: macromolecular complex (GO:0032991…	Proteasome (ko03050)	3	p1	(T)15	15	2466	2480	TGAATCTGGATCCTTGGCAT	60.426	20	TGTGGTGGCAAAATACCCTT	60.227	20	270	2253	2522	TGAATCTGGATCCTTGGCAT	60.426	20
c72401.graph_c0	43.87	48.72	40.75	41.36	44.29	43.8	42.3	39.4	39.7	42.6878	2.72833	0.0639137	0.0644597	0.0644597	0.116137	0.116137	0.0618228	0.0618228	--	--	--	--	[R]	General function prediction only	RIC1	--	R	General function prediction only	Quinoprotein amine dehydrogenase, beta chain-like, RIC1-like guanyl-nucleotide exchange factor isoform 1 [Theobroma cacao]	--	--	--	--	--	--	--	--	--	--	--	--	--	--	--	--	--	--	--	--
c69527.graph_c1	20.84	26.12	22.77	22.66	20.31	23.83	19.36	24.55	27.06	23.0556	2.46309	0.106833	-0.0526051	0.0526051	0.116104	0.116104	0.18112	0.18112	[LKJ]	--	Molecular Function: nucleic acid binding (GO:0003676);; Molecular Function: ATP binding (GO:0005524);; Molecular Function: ATP-dependent helicase activity (GO:0008026);;	K17679|0|cit:102616648|DEAD-box ATP-dependent RNA helicase 31-like; K17679 ATP-dependent RNA helicase MSS116, mitochondrial [EC:3.6.4.13] (A)	[A]	RNA processing and modification	Helicase conserved C-terminal domain;; DEAD/DEAH box helicase;; DEAD/DEAH box helicase	DEAD-box ATP-dependent RNA helicase 31 GN=RH31 OS=Arabidopsis thaliana (Mouse-ear cress) PE=2 SV=2	L	Replication, recombination and repair	PREDICTED: DEAD-box ATP-dependent RNA helicase 31-like [Citrus sinensis]	molecular function: binding (GO:0005488);; biological process: metabolic process (GO:0008152);; biological process: cellular process (GO:0009987);; biological process: single-organism process (GO:0044699);; molecular function: catalytic activity (GO:0003824)	--	--	--	--	--	--	--	--	--	--	--	--	--	--	--	--	--	--	--
c61304.graph_c0	24.44	17.95	20.95	25.99	17.27	20.81	16.94	18.9	18.53	20.1978	3.00352	0.148705	0.0343309	0.0343309	-0.115715	0.115715	-0.138726	0.138726	--	--	--	--	--	--	Alpha/beta hydrolase family;; alpha/beta hydrolase fold;; Alpha/beta hydrolase family	--	R	General function prediction only	PREDICTED: uncharacterized protein LOC100253478 isoform X2 [Vitis vinifera]	--	--	--	--	--	--	--	--	--	--	--	--	--	--	--	--	--	--	--	--
c66270.graph_c5	29.74	30.95	26.08	27.36	28.42	28.4	31.02	28.24	27.46	28.63	1.5656	0.054684	0.00611266	0.00611266	0.114883	0.114883	0.118861	0.118861	[FE]	--	Molecular Function: magnesium ion binding (GO:0000287);; Molecular Function: ribose phosphate diphosphokinase activity (GO:0004749);; Molecular Function: ATP binding (GO:0005524);; Cellular Component: cytosol (GO:0005829);; Cellular Component: plasma membrane (GO:0005886);; Biological Process: heme biosynthetic process (GO:0006783);; Biological Process: nucleoside metabolic process (GO:0009116);;…	--	[FE]	--	N-terminal domain of ribose phosphate pyrophosphokinase;; Phosphoribosyl transferase domain	Ribose-phosphate pyrophosphokinase 4 GN=PRS4 OS=Spinacia oleracea (Spinach) PE=2 SV=1	F	Nucleotide transport and metabolism	unnamed protein product [Vitis vinifera]	molecular function: binding (GO:0005488);; biological process: metabolic process (GO:0008152);; molecular function: catalytic activity (GO:0003824);; cellular component: cell (GO:0005623);; cellular component: cell part (GO:0044464);; cellular component: membrane (GO:0016020);; biological process: cellular process (GO:0009987);; biological process: single-organism process (GO:0044699);; cellular …	--	--	--	--	--	--	--	--	--	--	--	--	--	--	--	--	--	--	--
c64905.graph_c0	16.41	13.6	14.27	13.38	13.2	13.57	12.1	13.65	11.85	13.5589	1.2407	0.0915047	-0.0947689	0.0947689	-0.11432	0.11432	-0.00965767	0.00965767	--	--	Cellular Component: nucleus (GO:0005634);;	K13109|0|cit:102614437|protein Red-like; K13109 IK cytokine (A)	[T]	Signal transduction mechanisms	RED-like protein N-terminal region;; RED-like protein C-terminal region	Suppressor of mec-8 and unc-52 protein homolog 2 GN=SMU2 OS=Arabidopsis thaliana (Mouse-ear cress) PE=1 SV=1	T	Signal transduction mechanisms	hypothetical protein CISIN_1g008338mg [Citrus sinensis]	cellular component: cell (GO:0005623);; cellular component: organelle (GO:0043226);; cellular component: cell part (GO:0044464)	--	--	--	--	--	--	--	--	--	--	--	--	--	--	--	--	--	--	--
c71973.graph_c0	23.13	29.39	24.87	25.59	23.71	24.48	28.86	25.94	25.72	25.7433	2.011	0.0781174	-0.0636577	0.0636577	0.114227	0.114227	0.188777	0.188777	--	--	Cellular Component: mitochondrion (GO:0005739);; Cellular Component: Golgi apparatus (GO:0005794);;	--	[S]	Function unknown	Predicted membrane protein (DUF2053)	--	S	Function unknown	hypothetical protein EUGRSUZ_F02400 [Eucalyptus grandis]	cellular component: cell (GO:0005623);; cellular component: organelle (GO:0043226);; cellular component: cell part (GO:0044464)	--	1	p1	(T)13	13	684	696	TGTGGGAAATGTGAAGCGTA	60.111	20	CCTGTCTCCAAGCAGTTTGA	59.007	20	253	596	848	TGTGGGAAATGTGAAGCGTA	60.111	20
c65334.graph_c0	12.23	7.57	6.79	8.83	8.83	8.27	7.52	6.8	7.85	8.29889	1.55926	0.187887	0.00983709	0.00983709	-0.114119	0.114119	-0.114122	0.114122	--	--	Cellular Component: chloroplast (GO:0009507);;	--	--	--	PAP_fibrillin	Probable plastid-lipid-associated protein 10, chloroplastic (Precursor) GN=F14M4.26 OS=Arabidopsis thaliana (Mouse-ear cress) PE=2 SV=1	S	Function unknown	PREDICTED: probable plastid-lipid-associated protein 10, chloroplastic [Prunus mume]	cellular component: cell (GO:0005623);; cellular component: organelle (GO:0043226);; cellular component: cell part (GO:0044464)	--	--	--	--	--	--	--	--	--	--	--	--	--	--	--	--	--	--	--
c61054.graph_c0	16.33	13.67	9.98	10.92	13.55	10.06	10.14	14.58	9.17	12.0444	2.38183	0.197753	-0.138057	0.138057	-0.114107	0.114107	0.0330869	0.0330869	--	--	--	--	--	--	BSD domain	--	S	Function unknown	hypothetical protein JCGZ_11782 [Jatropha curcas]	--	--	--	--	--	--	--	--	--	--	--	--	--	--	--	--	--	--	--	--
c66821.graph_c0	36.49	39.47	39.33	45.49	39.55	38.14	44.08	37.85	35.8	39.5778	3.0579	0.077263	0.125825	0.125825	0.114004	0.114004	-0.00138463	0.00138463	--	--	Cellular Component: mitochondrial inner membrane (GO:0005743);; Biological Process: glycolytic process (GO:0006096);; Biological Process: protein targeting to vacuole (GO:0006623);; Biological Process: mitochondrial pyruvate transport (GO:0006850);; Biological Process: aerobic respiration (GO:0009060);; Biological Process: response to cadmium ion (GO:0046686);;	--	[S]	Function unknown	Rapid ALkalinization Factor (RALF)	Mitochondrial pyruvate carrier 4 {ECO:0000305} OS=Arabidopsis thaliana (Mouse-ear cress) PE=3 SV=1	S	Function unknown	PREDICTED: mitochondrial pyruvate carrier 2 [Populus euphratica]	cellular component: cell (GO:0005623);; cellular component: membrane (GO:0016020);; cellular component: organelle (GO:0043226);; cellular component: organelle part (GO:0044422);; cellular component: cell part (GO:0044464);; biological process: metabolic process (GO:0008152);; biological process: cellular process (GO:0009987);; biological process: single-organism process (GO:0044699);; biological …	--	1	p1	(T)10	10	366	375	CACAAGGCTTTTGGATGGTT	59.971	20	CCATTGAGCAGCATTCATTG	60.22	20	257	213	469	CCAAATTTTCCCCAGTTGAA	59.772	20
c69990.graph_c1	32.26	35.67	31.25	28.9	30.42	30.25	27.32	26.82	23.61	29.6111	3.28352	0.110888	0.00568498	0.00568498	-0.113624	0.113624	-0.109256	0.109256	[EH]	--	Molecular Function: catalytic activity (GO:0003824);; Biological Process: Mo-molybdopterin cofactor biosynthetic process (GO:0006777);;	--	[EH]	--	Probable molybdopterin binding domain;; Phosphoadenosine phosphosulfate reductase family	--	H	Coenzyme transport and metabolism	PREDICTED: FAD synthase [Vitis vinifera]	biological process: metabolic process (GO:0008152);; molecular function: catalytic activity (GO:0003824);; biological process: cellular process (GO:0009987)	--	--	--	--	--	--	--	--	--	--	--	--	--	--	--	--	--	--	--
c70547.graph_c0	162.47	172.11	187.45	179.09	201.21	191.8	187.88	210.07	184.38	186.273	13.5248	0.0726072	0.0456946	0.0456946	0.113319	0.113319	0.0775238	0.0775238	[UR]	--	Biological Process: cell communication (GO:0007154);; Molecular Function: phosphatidylinositol binding (GO:0035091);;	--	[U]	Intracellular trafficking, secretion, and vesicular transport	PX domain;; Vps5 C terminal like;; Stm1;; Hyaluronan / mRNA binding family	Sorting nexin 2A GN=SNX2A OS=Arabidopsis thaliana (Mouse-ear cress) PE=1 SV=1	S	Function unknown	hypothetical protein JCGZ_17361 [Jatropha curcas]	biological process: cellular process (GO:0009987);; biological process: single-organism process (GO:0044699);; molecular function: binding (GO:0005488)	--	2	p1	(A)11	11	2051	2061	CCTTGCCTCCCTCACTACAC	59.721	20	GTGCTTGGTGAACGTGCTAA	59.911	20	225	1871	2095	CCTTGCCTCCCTCACTACAC	59.721	20
c71140.graph_c0	9.5	7.42	6.84	9.04	12.12	7.53	10.51	9.51	8.17	8.96	1.58197	0.176559	-0.0368567	0.0368567	-0.113305	0.113305	-0.0693886	0.0693886	--	--	Molecular Function: hydrolase activity, hydrolyzing O-glycosyl compounds (GO:0004553);; Biological Process: xylan catabolic process (GO:0045493);;	--	--	--	Carbohydrate binding domain;; Glycosyl hydrolase family 10;; Cyanobacterial and plastid NDH-1 subunit M	NAD(P)H-quinone oxidoreductase subunit M, chloroplastic (Precursor) OS=Vitis vinifera (Grape) PE=2 SV=1	R	General function prediction only	Glycosyl hydrolase family 10 protein / carbohydrate-binding domain-containing protein isoform 1 [Theobroma cacao]	biological process: metabolic process (GO:0008152);; molecular function: catalytic activity (GO:0003824);; biological process: cellular process (GO:0009987)	--	1	p3	(AAT)6	18	1260	1277	TCAAACTGAATCCCCGAGTT	59.526	20	ACCCTAACCAAGGTCACGTC	58.917	20	277	1030	1306	AAGTCAAACTGAATCCCCGA	59.526	20
c56029.graph_c0	37.3	36.9	40.59	33.76	33.8	33.89	32.33	35.24	33.57	35.2644	2.42578	0.0687884	-0.17935	0.17935	-0.113277	0.113277	0.0760039	0.0760039	--	--	Biological Process: response to reactive oxygen species (GO:0000302);; Cellular Component: chloroplast outer membrane (GO:0009707);; Biological Process: chloroplast fission (GO:0010020);; Biological Process: protein-phycocyanobilin linkage (GO:0017009);; Biological Process: regulation of cell division (GO:0051302);;	--	--	--	CpeT/CpcT family (DUF1001)	Chromophore lyase CRL, chloroplastic GN=K3K7.20 OS=Arabidopsis thaliana (Mouse-ear cress) PE=1 SV=1	S	Function unknown	conserved hypothetical protein [Ricinus communis]	biological process: response to stimulus (GO:0050896);; cellular component: cell (GO:0005623);; cellular component: membrane (GO:0016020);; cellular component: organelle (GO:0043226);; cellular component: organelle part (GO:0044422);; cellular component: cell part (GO:0044464);; biological process: cellular process (GO:0009987);; biological process: cellular component organization or biogenesis (…	--	--	--	--	--	--	--	--	--	--	--	--	--	--	--	--	--	--	--
c68384.graph_c0	56.87	71.73	57.11	51.09	66.91	53.62	50.12	56.71	49.23	57.0433	7.2214	0.126595	-0.141219	0.141219	-0.1129	0.1129	0.0372153	0.0372153	--	--	Cellular Component: plasma membrane (GO:0005886);; Biological Process: cytoskeleton organization (GO:0007010);; Molecular Function: microtubule binding (GO:0008017);; Biological Process: plant-type cell wall biogenesis (GO:0009832);; Cellular Component: cortical microtubule, transverse to long axis (GO:0010005);; Biological Process: xylem and phloem pattern formation (GO:0010051);;	--	--	--	Myosin II heavy chain-like	Microtubule-associated protein 70-2 GN=MAP70.2 OS=Arabidopsis thaliana (Mouse-ear cress) PE=1 SV=1	Z	Cytoskeleton	PREDICTED: microtubule-associated protein 70-2 [Vitis vinifera]	cellular component: cell (GO:0005623);; cellular component: membrane (GO:0016020);; cellular component: cell part (GO:0044464);; biological process: cellular process (GO:0009987);; biological process: cellular component organization or biogenesis (GO:0071840);; molecular function: binding (GO:0005488);; cellular component: macromolecular complex (GO:0032991);; cellular component: organelle (GO:00…	--	1	p1	(A)12	12	273	284	ATGCATCCTTGCATCAAATG	59.504	20	CGGGTCTTCTTTGAGTGGTC	59.697	20	245	100	344	ATGCATCCTTGCATCAAATG	59.504	20
c62481.graph_c0	20.89	18.81	18.63	20.19	18.76	20.69	20.46	14.18	18.64	19.0278	1.93108	0.101487	0.0544372	0.0544372	-0.112677	0.112677	-0.157565	0.157565	--	--	--	--	--	--	Chaperone for wingless signalling and trafficking of LDL receptor	--	R	General function prediction only	PREDICTED: LDLR chaperone MESD [Vitis vinifera]	--	--	1	p1	(A)10	10	14	23	--	--	--	--	--	--	--	--	--	--	--	--
c66850.graph_c1	20.97	28.63	23.61	20.04	24.7	21.73	18.71	21.89	22.08	22.4844	2.73952	0.121841	-0.104226	0.104226	-0.112554	0.112554	0.00235372	0.00235372	[V]	Defense mechanisms	Molecular Function: ATP binding (GO:0005524);; Biological Process: ATP catabolic process (GO:0006200);; Molecular Function: xenobiotic-transporting ATPase activity (GO:0008559);; Cellular Component: chloroplast envelope (GO:0009941);; Cellular Component: integral component of membrane (GO:0016021);; Biological Process: transmembrane transport (GO:0055085);;	--	--	--	ABC transporter transmembrane region;; ABC transporter	ABC transporter B family member 28 GN=M7J2.180 OS=Arabidopsis thaliana (Mouse-ear cress) PE=2 SV=1	Q	Secondary metabolites biosynthesis, transport and catabolism	PREDICTED: ABC transporter B family member 28 [Prunus mume]	molecular function: binding (GO:0005488);; biological process: metabolic process (GO:0008152);; biological process: cellular process (GO:0009987);; biological process: single-organism process (GO:0044699);; biological process: response to stimulus (GO:0050896);; biological process: localization (GO:0051179);; molecular function: catalytic activity (GO:0003824);; molecular function: transporter ac…	--	--	--	--	--	--	--	--	--	--	--	--	--	--	--	--	--	--	--
c64783.graph_c3	14.62	14.76	15.12	13.94	14.63	16.69	15.21	12.7	15.95	14.8467	1.07279	0.0722583	0.0408836	0.0408836	0.112422	0.112422	0.0812729	0.0812729	--	--	--	--	--	--	--	WPP domain-associated protein (Fragment) GN=WAP OS=Solanum lycopersicum (Tomato) PE=1 SV=1	S	Function unknown	PREDICTED: WPP domain-associated protein [Prunus mume]	--	--	1	p1	(T)14	14	1708	1721	GGAGAGTAATGATCGAGGGC	58.693	20	GGGCTGTAATTTTGGAGGGT	60.187	20	270	1514	1783	GGAGAGTAATGATCGAGGGCT	59.688	21
c59779.graph_c0	12.74	13.57	10.37	11.77	12.31	14.23	12.91	12	12.02	12.4356	1.04947	0.0843924	0.0924876	0.0924876	0.112037	0.112037	0.030172	0.030172	--	--	--	--	--	--	--	--	S	Function unknown	Uncharacterized protein TCM_037699 [Theobroma cacao]	--	--	1	p1	(A)11	11	3	13	--	--	--	--	--	--	--	--	--	--	--	--
c70888.graph_c2	35.11	41.01	30.62	37.04	43.34	40.66	39.9	40.33	37.2	38.3567	3.60437	0.0939699	0.100488	0.100488	0.111849	0.111849	0.0224231	0.0224231	[R]	General function prediction only	--	--	--	--	--	Plastid division protein PDV1 GN=PDV1 OS=Arabidopsis thaliana (Mouse-ear cress) PE=1 SV=1	S	Function unknown	Alpha/beta-Hydrolases superfamily protein isoform 3 [Theobroma cacao]	--	--	1	p1	(T)10	10	1125	1134	TGGAATGGGACCTCAATGAT	60.135	20	CGTTGCTGTGTTTGTACGGT	59.682	20	265	1057	1321	TGGAATGGGACCTCAATGAT	60.135	20
c68989.graph_c0	47.42	32.94	35.13	34.9	41.79	41.81	31.59	31.6	38.98	37.3511	5.16705	0.138337	0.175596	0.175596	0.111693	0.111693	-0.0556436	0.0556436	--	--	--	--	--	--	GRF zinc finger	--	--	--	--	--	--	1	p1	(A)11	11	880	890	TTCCCAGAAAAATGTTTTAACGA	59.872	23	GACTTGATGCCATAGTGCGA	59.83	20	263	771	1033	TTCCCAGAAAAATGTTTTAACGA	59.872	23
c70346.graph_c3	18.22	16.09	14.39	15.23	18.15	16.63	18.24	14.47	16.16	16.3978	1.45682	0.0888426	0.0433666	0.0433666	0.111395	0.111395	0.0773482	0.0773482	[L]	Replication, recombination and repair	Molecular Function: DNA binding (GO:0003677);; Molecular Function: DNA ligase (ATP) activity (GO:0003910);; Molecular Function: ATP binding (GO:0005524);; Biological Process: DNA replication (GO:0006260);; Biological Process: double-strand break repair (GO:0006302);; Biological Process: DNA recombination (GO:0006310);; Cellular Component: plasmodesma (GO:0009506);; Biological Process: response to…	K10777|1.81816e-173|pper:PRUPE_ppa018049mg|hypothetical protein; K10777 DNA ligase 4 [EC:6.5.1.1] (A)	[L]	Replication, recombination and repair	DNA ligase N terminus;; ATP dependent DNA ligase domain	DNA ligase 4 GN=LIG4 OS=Arabidopsis thaliana (Mouse-ear cress) PE=1 SV=1	L	Replication, recombination and repair	hypothetical protein PRUPE_ppa018049mg, partial [Prunus persica]	molecular function: binding (GO:0005488);; biological process: metabolic process (GO:0008152);; biological process: cellular process (GO:0009987);; molecular function: catalytic activity (GO:0003824);; biological process: single-organism process (GO:0044699);; biological process: response to stimulus (GO:0050896);; cellular component: cell junction (GO:0030054);; cellular component: symplast (GO:…	Non-homologous end-joining (ko03450)	2	p1	(T)15	15	3013	3027	ATCATTGCTCCATGTCACGA	60.08	20	TAAGATTTGCCATATCGCCC	59.892	20	254	2853	3106	GATCATTGCTCCATGTCACG	60.08	20
c72711.graph_c0	7.66	7.65	7.14	7.94	9.67	6.63	8.67	8.67	6.47	7.83333	0.979558	0.12505	0.129706	0.129706	0.11109	0.11109	-0.00947614	0.00947614	--	--	--	--	--	--	Myb-like DNA-binding domain;; PPR repeat family	Pentatricopeptide repeat-containing protein At1g11710, mitochondrial (Precursor) GN=At1g11710 OS=Arabidopsis thaliana (Mouse-ear cress) PE=2 SV=1	C	Energy production and conversion	PREDICTED: uncharacterized protein LOC100247051 isoform X1 [Vitis vinifera]	--	--	--	--	--	--	--	--	--	--	--	--	--	--	--	--	--	--	--	--
c52095.graph_c0	51.48	64.12	44.77	45.4	53.28	41.67	32.59	57.9	50.68	49.0989	8.74895	0.17819	-0.135838	0.135838	-0.110886	0.110886	0.0364133	0.0364133	--	--	--	--	[R]	General function prediction only	ML domain	--	R	General function prediction only	hypothetical protein JCGZ_08735 [Jatropha curcas]	--	--	--	--	--	--	--	--	--	--	--	--	--	--	--	--	--	--	--	--
c71632.graph_c0	218.5	264.44	276.8	235.59	250.12	249.92	273.47	243.79	226.45	248.787	19.0246	0.0764697	-0.00316278	0.00316278	0.110811	0.110811	0.123664	0.123664	--	--	Cellular Component: mediator complex (GO:0016592);; Biological Process: para-aminobenzoic acid metabolic process (GO:0046482);;	K15170|0|cit:102624786|mediator of RNA polymerase II transcription subunit 27-like; K15170 mediator of RNA polymerase II transcription subunit 27 (A)	--	--	Mediator complex subunit 27;; Eukaryotic aspartyl protease	Mediator of RNA polymerase II transcription subunit 27 OS=Arabidopsis thaliana (Mouse-ear cress) PE=1 SV=1	K	Transcription	PREDICTED: mediator of RNA polymerase II transcription subunit 27-like [Citrus sinensis]	cellular component: cell (GO:0005623);; cellular component: membrane-enclosed lumen (GO:0031974);; cellular component: macromolecular complex (GO:0032991);; cellular component: organelle (GO:0043226);; cellular component: organelle part (GO:0044422);; cellular component: cell part (GO:0044464);; biological process: metabolic process (GO:0008152);; biological process: cellular process (GO:0009987)…	--	3	p3	(ATT)5	15	782	796	GTTGCCTTAAGCATGGGTGT	60	20	CAGAACCAGGGGAGACAAAA	60.081	20	232	718	949	GTTGCCTTAAGCATGGGTGT	60	20
c69983.graph_c0	23.43	24.3	24.75	19.41	27.81	25.4	24.05	24.91	23.8	24.2067	2.08187	0.0860042	0.00680352	0.00680352	0.110474	0.110474	0.112624	0.112624	--	--	Molecular Function: phosphorelay sensor kinase activity (GO:0000155);; Biological Process: phosphorelay signal transduction system (GO:0000160);; Cellular Component: membrane (GO:0016020);; Biological Process: signal transduction by phosphorylation (GO:0023014);;	K12879|0|vvi:100254201|THO complex subunit 2; K12879 THO complex subunit 2 (A)	[K]	Transcription	Transcription factor/nuclear export subunit protein 2;; Transcription- and export-related complex subunit	THO complex subunit 2 GN=F5A9.21/F5A9.22 OS=Arabidopsis thaliana (Mouse-ear cress) PE=1 SV=1	K	Transcription	PREDICTED: THO complex subunit 2 [Vitis vinifera]	biological process: metabolic process (GO:0008152);; biological process: cellular process (GO:0009987);; biological process: signaling (GO:0023052);; biological process: single-organism process (GO:0044699);; biological process: response to stimulus (GO:0050896);; biological process: biological regulation (GO:0065007);; molecular function: catalytic activity (GO:0003824);; molecular function: rec…	RNA transport (ko03013);; Spliceosome (ko03040)	--	--	--	--	--	--	--	--	--	--	--	--	--	--	--	--	--	--
c71513.graph_c0	74.21	57.21	61.17	66.88	60.65	63.82	55.45	48.06	59.91	60.8178	6.91762	0.113743	0.184912	0.184912	0.110406	0.110406	-0.0649487	0.0649487	--	--	Biological Process: signal transduction (GO:0007165);;	--	--	--	--	Plant intracellular Ras-group-related LRR protein 6 GN=P0452F04.20 OS=Oryza sativa subsp. japonica (Rice) PE=2 SV=1	S	Function unknown	Leucine-rich repeat (LRR) family protein [Theobroma cacao]	biological process: cellular process (GO:0009987);; biological process: signaling (GO:0023052);; biological process: single-organism process (GO:0044699);; biological process: response to stimulus (GO:0050896);; biological process: biological regulation (GO:0065007)	--	1	p1	(T)11	11	816	826	GCACATGCACATGCACAGTA	60.356	20	CACGATGGAAATAGCAACGA	59.688	20	275	609	883	TGCACATGCACAGTAATTGG	59.151	20
c57878.graph_c0	24.43	21.46	24.04	19.66	21.69	20.68	20.77	19.01	20.6	21.3711	1.71677	0.0803313	-0.130569	0.130569	-0.110259	0.110259	0.0291873	0.0291873	--	--	Biological Process: primary metabolic process (GO:0044238);; Biological Process: cellular macromolecule metabolic process (GO:0044260);;	--	[K]	Transcription	Myb/SANT-like DNA-binding domain;; Alcohol dehydrogenase transcription factor Myb/SANT-like	Trihelix transcription factor ASIL2 {ECO:0000305} OS=Arabidopsis thaliana (Mouse-ear cress) PE=2 SV=1	K	Transcription	PREDICTED: uncharacterized protein LOC103340915 [Prunus mume]	biological process: metabolic process (GO:0008152);; biological process: cellular process (GO:0009987)	--	--	--	--	--	--	--	--	--	--	--	--	--	--	--	--	--	--	--
c68121.graph_c1	75.52	85.04	86.79	77.52	87.11	76.92	82.17	76.1	75.04	80.2456	4.73454	0.0590007	0.0434814	0.0434814	0.110102	0.110102	0.0761166	0.0761166	[R]	General function prediction only	Molecular Function: nucleotide binding (GO:0000166);; Biological Process: mRNA splicing, via spliceosome (GO:0000398);; Molecular Function: RNA binding (GO:0003723);; Molecular Function: protein binding (GO:0005515);; Cellular Component: nucleus (GO:0005634);; Biological Process: production of siRNA involved in RNA interference (GO:0030422);; Cellular Component: ribonucleoprotein complex (GO:0030…	K11093|2.19949e-84|rcu:RCOM_0536950|U1 small nuclear ribonucleoprotein 70 kDa, putative; K11093 U1 small nuclear ribonucleoprotein 70kDa (A)	[A]	RNA processing and modification	RNA recognition motif. (a.k.a. RRM, RBD, or RNP domain);; RNA recognition motif. (a.k.a. RRM, RBD, or RNP domain);; U1 small nuclear ribonucleoprotein of 70kDa MW N terminal;; RNA recognition motif. (a.k.a. RRM, RBD, or RNP domain);; Transmembrane Fragile-X-F protein	U1 small nuclear ribonucleoprotein 70 kDa GN=RNU1 OS=Arabidopsis thaliana (Mouse-ear cress) PE=1 SV=1	A	RNA processing and modification	hypothetical protein 111O18.18 [Coffea canephora]	molecular function: binding (GO:0005488);; biological process: metabolic process (GO:0008152);; biological process: cellular process (GO:0009987);; cellular component: cell (GO:0005623);; cellular component: organelle (GO:0043226);; cellular component: cell part (GO:0044464);; biological process: single-organism process (GO:0044699);; biological process: response to stimulus (GO:0050896);; biolog…	Spliceosome (ko03040)	4	p1	(A)10	10	4752	4761	--	--	--	--	--	--	--	--	--	--	--	--
c63639.graph_c0	7.49	6.84	7.6	6.87	7.96	8.3	6.76	7.8	8.06	7.52	0.541787	0.0720462	0.0661407	0.0661407	0.109964	0.109964	0.0533902	0.0533902	--	--	Cellular Component: membrane (GO:0016020);; Biological Process: metal ion transport (GO:0030001);; Molecular Function: metal ion transmembrane transporter activity (GO:0046873);; Biological Process: transmembrane transport (GO:0055085);;	--	--	--	CorA-like Mg2+ transporter protein	--	S	Function unknown	Magnesium transporter CorA-like family protein [Theobroma cacao]	cellular component: membrane (GO:0016020);; biological process: single-organism process (GO:0044699);; biological process: localization (GO:0051179);; biological process: cellular process (GO:0009987);; molecular function: transporter activity (GO:0005215)	--	--	--	--	--	--	--	--	--	--	--	--	--	--	--	--	--	--	--
c66635.graph_c0	27.35	27.68	33.42	28	31.33	31.66	33.34	27.57	28.76	29.9011	2.38365	0.0797176	0.0536423	0.0536423	0.109813	0.109813	0.0649446	0.0649446	[I]	Lipid transport and metabolism	Molecular Function: glycylpeptide N-tetradecanoyltransferase activity (GO:0004379);; Cellular Component: cytosol (GO:0005829);; Cellular Component: ribosome (GO:0005840);; Biological Process: N-terminal protein myristoylation (GO:0006499);; Biological Process: embryonic shoot morphogenesis (GO:0010064);; Biological Process: growth (GO:0040007);;	K00671|0|pxb:103940920|glycylpeptide N-tetradecanoyltransferase 1; K00671 glycylpeptide N-tetradecanoyltransferase [EC:2.3.1.97] (A)	[I]	Lipid transport and metabolism	Myristoyl-CoA:protein N-myristoyltransferase, C-terminal domain;; Myristoyl-CoA:protein N-myristoyltransferase, N-terminal domain	Glycylpeptide N-tetradecanoyltransferase 1 GN=NMT1 OS=Arabidopsis thaliana (Mouse-ear cress) PE=1 SV=2	I	Lipid transport and metabolism	PREDICTED: glycylpeptide N-tetradecanoyltransferase 1 isoform X1 [Pyrus x bretschneideri]	biological process: metabolic process (GO:0008152);; molecular function: catalytic activity (GO:0003824);; cellular component: cell (GO:0005623);; cellular component: cell part (GO:0044464);; cellular component: macromolecular complex (GO:0032991);; cellular component: organelle (GO:0043226);; biological process: cellular process (GO:0009987);; biological process: multicellular organismal process…	--	--	--	--	--	--	--	--	--	--	--	--	--	--	--	--	--	--	--
c58999.graph_c1	82.87	80.39	73.44	73.73	72.07	65.48	79.56	69.99	64.05	73.5089	6.14669	0.0836183	-0.160656	0.160656	-0.109302	0.109302	0.0608476	0.0608476	--	--	Biological Process: protein targeting to mitochondrion (GO:0006626);; Biological Process: embryo sac egg cell differentiation (GO:0009560);;	K14545|1.65496e-13|vvi:100265155|protein FAM133A; K14545 ribosomal RNA-processing protein 7 (A)	[A]	RNA processing and modification	--	--	S	Function unknown	hypothetical protein VITISV_022290 [Vitis vinifera]	biological process: cellular process (GO:0009987);; biological process: single-organism process (GO:0044699);; biological process: localization (GO:0051179);; biological process: cellular component organization or biogenesis (GO:0071840);; biological process: reproduction (GO:0000003);; biological process: reproductive process (GO:0022414);; biological process: multicellular organismal process (G…	Ribosome biogenesis in eukaryotes (ko03008)	1	p1	(A)11	11	247	257	TAGTCCTCGTCCCCAGAAGA	59.797	20	GGGAGGGTAATTCTGGAACC	59.629	20	270	82	351	TGAGTAGTCCTCGTCCCCAG	60.252	20
c71918.graph_c2	64.33	56.32	67.64	54.83	67.95	62.9	61	47.9	51.18	59.3389	6.75172	0.113782	0.0270417	0.0270417	-0.108975	0.108975	-0.128253	0.128253	[P]	Inorganic ion transport and metabolism	Cellular Component: plasma membrane (GO:0005886);; Molecular Function: secondary active sulfate transmembrane transporter activity (GO:0008271);; Biological Process: sulfate transport (GO:0008272);; Biological Process: cellular response to sulfate starvation (GO:0009970);; Cellular Component: integral component of membrane (GO:0016021);; Biological Process: transmembrane transport (GO:0055085);; …	K17470|3.28347e-164|csv:101223807|sulfate transporter 1.3-like; K17470 sulfate transporter 1, high-affinity (A)	[P]	Inorganic ion transport and metabolism	Sulfate transporter family;; Sulfate transporter N-terminal domain with GLY motif	Sulfate transporter 1.3 GN=SULTR1;3 OS=Arabidopsis thaliana (Mouse-ear cress) PE=2 SV=1	P	Inorganic ion transport and metabolism	PREDICTED: sulfate transporter 1.3-like [Cucumis sativus]	cellular component: cell (GO:0005623);; cellular component: membrane (GO:0016020);; cellular component: cell part (GO:0044464);; biological process: cellular process (GO:0009987);; biological process: single-organism process (GO:0044699);; biological process: localization (GO:0051179);; molecular function: transporter activity (GO:0005215);; biological process: response to stimulus (GO:0050896);;…	--	2	p1	(T)10	10	425	434	GCAAATTGGAAAAGACCCAC	59.41	20	CTTGACAAACACTGCATCCG	60.301	20	254	397	650	TGGGGAGGGACTTTTTAACC	60.159	20
c55071.graph_c1	7.87	10.61	7.92	10.14	10.26	10.4	10.08	10.02	7.48	9.42	1.19314	0.12666	0.0696474	0.0696474	-0.108778	0.108778	-0.167909	0.167909	--	--	Cellular Component: mitochondrial outer membrane (GO:0005741);; Molecular Function: voltage-gated anion channel activity (GO:0008308);; Molecular Function: porin activity (GO:0015288);; Biological Process: regulation of anion transport (GO:0044070);; Cellular Component: pore complex (GO:0046930);; Biological Process: transmembrane transport (GO:0055085);;	K15040|8.78904e-17|cit:102619225|mitochondrial outer membrane protein porin of 34 kDa-like; K15040 voltage-dependent anion channel protein 2 (A)	[P]	Inorganic ion transport and metabolism	--	Mitochondrial outer membrane protein porin of 34 kDa OS=Solanum tuberosum (Potato) PE=1 SV=2	P	Inorganic ion transport and metabolism	PREDICTED: mitochondrial outer membrane protein porin of 34 kDa-like [Citrus sinensis]	cellular component: cell (GO:0005623);; cellular component: membrane (GO:0016020);; cellular component: organelle (GO:0043226);; cellular component: organelle part (GO:0044422);; cellular component: cell part (GO:0044464);; biological process: cellular process (GO:0009987);; biological process: single-organism process (GO:0044699);; biological process: localization (GO:0051179);; biological proce…	--	--	--	--	--	--	--	--	--	--	--	--	--	--	--	--	--	--	--
c69694.graph_c0	41.72	39.02	31.81	36.09	33.47	37.19	31.04	31.96	29.59	34.6544	3.84327	0.110903	-0.0564807	0.0564807	-0.108682	0.108682	-0.0416862	0.0416862	[S]	Function unknown	Cellular Component: GINS complex (GO:0000811);; Biological Process: DNA-dependent DNA replication (GO:0006261);; Biological Process: embryo development ending in seed dormancy (GO:0009793);;	K10734|3.60206e-89|cam:101498078|DNA replication complex GINS protein PSF3-like; K10734 GINS complex subunit 3 (A)	[S]	Function unknown	GINS complex protein;; Phospholipase A2	Probable phospholipase A2 homolog 1 (Precursor) OS=Oryza sativa subsp. japonica (Rice) PE=2 SV=1	S	Function unknown	PREDICTED: DNA replication complex GINS protein PSF3-like [Cicer arietinum]	cellular component: cell (GO:0005623);; cellular component: membrane-enclosed lumen (GO:0031974);; cellular component: macromolecular complex (GO:0032991);; cellular component: organelle (GO:0043226);; cellular component: organelle part (GO:0044422);; cellular component: cell part (GO:0044464);; biological process: metabolic process (GO:0008152);; biological process: cellular process (GO:0009987)…	--	--	--	--	--	--	--	--	--	--	--	--	--	--	--	--	--	--	--
c71128.graph_c1	61.16	62.46	57.56	56.67	67.15	59.46	67.71	63.67	63.99	62.2033	3.66659	0.0589452	-0.053116	0.053116	0.10847	0.10847	0.170949	0.170949	--	--	Biological Process: mitotic G2 phase (GO:0000085);; Cellular Component: COP9 signalosome (GO:0008180);; Biological Process: cullin deneddylation (GO:0010388);;	K12178|7.45059e-129|pop:POPTR_0014s17920g|POPTRDRAFT_665031; hypothetical protein; K12178 COP9 signalosome complex subunit 4 (A)	[OT]	--	Eukaryotic protein of unknown function (DUF872)	COP9 signalosome complex subunit 4 GN=MBD2.17 OS=Arabidopsis thaliana (Mouse-ear cress) PE=1 SV=2	T	Signal transduction mechanisms	hypothetical protein POPTR_0014s17920g [Populus trichocarpa]	biological process: biological phase (GO:0044848);; cellular component: cell (GO:0005623);; cellular component: macromolecular complex (GO:0032991);; cellular component: organelle (GO:0043226);; cellular component: organelle part (GO:0044422);; cellular component: cell part (GO:0044464);; biological process: metabolic process (GO:0008152);; biological process: cellular process (GO:0009987)	--	1	p1	(A)13	13	1582	1594	AACACCACAATTCATCTTCGG	59.845	21	TTTTCCACCCGCTTTAGTTG	60.103	20	240	1408	1647	AACACCACAATTCATCTTCGG	59.845	21
c68388.graph_c3	15.7	13.55	17.5	13.8	18.3	16.53	13.98	15.03	14.68	15.4522	1.59222	0.103042	0.154447	0.154447	0.108416	0.108416	-0.0375586	0.0375586	--	--	Molecular Function: DNA binding (GO:0003677);; Molecular Function: ubiquitin-protein transferase activity (GO:0004842);; Cellular Component: nucleus (GO:0005634);; Biological Process: ubiquitin-dependent protein catabolic process (GO:0006511);; Biological Process: multicellular organismal development (GO:0007275);; Molecular Function: zinc ion binding (GO:0008270);; Biological Process: protein ub…	--	[R]	General function prediction only	Plant mobile domain;; HMG (high mobility group) box;; HMG-box domain;; Seven in absentia protein family	E3 ubiquitin-protein ligase SINA-like 10 GN=At5g37930 OS=Arabidopsis thaliana (Mouse-ear cress) PE=2 SV=1	R	General function prediction only	PREDICTED: uncharacterized protein LOC100263780 isoform X1 [Vitis vinifera]	molecular function: binding (GO:0005488);; biological process: metabolic process (GO:0008152);; biological process: cellular process (GO:0009987);; molecular function: catalytic activity (GO:0003824);; cellular component: cell (GO:0005623);; cellular component: organelle (GO:0043226);; cellular component: cell part (GO:0044464);; biological process: multicellular organismal process (GO:0032501);;…	--	2	p1	(T)12	12	2820	2831	--	--	--	--	--	--	--	--	--	--	--	--
c68065.graph_c2	13.85	11.51	12.99	10.29	11.42	10.95	11.19	11.17	12.58	11.7722	1.06563	0.0905209	0.0506219	0.0506219	0.1084	0.1084	0.0676924	0.0676924	[R]	General function prediction only	Biological Process: mitotic cell cycle (GO:0000278);; Biological Process: mRNA splicing, via spliceosome (GO:0000398);; Molecular Function: protein binding (GO:0005515);; Cellular Component: nucleus (GO:0005634);; Biological Process: mRNA export from nucleus (GO:0006406);; Biological Process: protein dephosphorylation (GO:0006470);; Biological Process: sister chromatid cohesion (GO:0007062);; Bio…	K15542|1.77671e-165|pvu:PHAVU_011G207400g|hypothetical protein; K15542 polyadenylation factor subunit 2 (A)	[A]	RNA processing and modification	WD domain, G-beta repeat	Flowering time control protein FY GN=FY OS=Arabidopsis thaliana (Mouse-ear cress) PE=1 SV=1	A	RNA processing and modification	hypothetical protein JCGZ_24522 [Jatropha curcas]	biological process: cellular process (GO:0009987);; biological process: single-organism process (GO:0044699);; biological process: metabolic process (GO:0008152);; molecular function: binding (GO:0005488);; cellular component: cell (GO:0005623);; cellular component: organelle (GO:0043226);; cellular component: cell part (GO:0044464);; biological process: localization (GO:0051179);; biological pro…	mRNA surveillance pathway (ko03015)	2	p1	(A)10	10	1525	1534	TGCAATCTTATTGAACCCCA	58.965	20	ACTGGTGAGTGGGCACTTTT	59.622	20	278	1495	1772	TGCAATCTTATTGAACCCCA	58.965	20
c67218.graph_c0	12.59	14.75	12.2	11.28	15.52	12.1	10.6	12.26	10.82	12.4578	1.57774	0.126647	0.0379866	0.0379866	-0.108223	0.108223	-0.136935	0.136935	[C]	Energy production and conversion	Molecular Function: aldehyde dehydrogenase (NAD) activity (GO:0004029);; Biological Process: oxidation-reduction process (GO:0055114);;	--	[C]	Energy production and conversion	Aldehyde dehydrogenase family;; Aldehyde dehydrogenase family	Aldehyde dehydrogenase 22A1 (Precursor) GN=ALDH22A1 OS=Arabidopsis thaliana (Mouse-ear cress) PE=2 SV=2	C	Energy production and conversion	hypothetical protein CICLE_v10004594mg [Citrus clementina]	biological process: metabolic process (GO:0008152);; biological process: single-organism process (GO:0044699);; molecular function: catalytic activity (GO:0003824)	--	--	--	--	--	--	--	--	--	--	--	--	--	--	--	--	--	--	--
c57289.graph_c0	45.05	39.33	35.11	48.89	35.15	37.74	41.76	39.71	38.04	40.0867	4.27501	0.106644	0.077645	0.077645	0.108157	0.108157	0.0419762	0.0419762	--	--	--	--	[K]	Transcription	SWIB/MDM2 domain	Zinc finger CCCH domain-containing protein 19 GN=F16F14 OS=Arabidopsis thaliana (Mouse-ear cress) PE=1 SV=3	K	Transcription	hypothetical protein VITISV_011142 [Vitis vinifera]	--	--	--	--	--	--	--	--	--	--	--	--	--	--	--	--	--	--	--	--
c64141.graph_c0	68.54	63.95	69.56	70.19	72.31	75.99	63.46	62.8	75.71	69.1678	4.72772	0.0683515	0.169938	0.169938	0.108011	0.108011	-0.0521785	0.0521785	--	--	Molecular Function: NADH dehydrogenase activity (GO:0003954);; Biological Process: electron transport chain (GO:0022900);;	K03937|1.75399e-58|rcu:RCOM_0580980|NADH-ubiquinone oxidoreductase 18 kDa subunit, mitochondrial precursor, putative (EC:1.6.99.3); K03937 NADH dehydrogenase (ubiquinone) Fe-S protein 4 (A)	[C]	Energy production and conversion	ETC complex I subunit conserved region	NADH dehydrogenase [ubiquinone] iron-sulfur protein 4, mitochondrial (Precursor) GN=FRO1 OS=Arabidopsis thaliana (Mouse-ear cress) PE=2 SV=1	C	Energy production and conversion	hypothetical protein MIMGU_mgv1a015582mg [Erythranthe guttata]	biological process: metabolic process (GO:0008152);; biological process: single-organism process (GO:0044699);; molecular function: catalytic activity (GO:0003824);; biological process: cellular process (GO:0009987)	Oxidative phosphorylation (ko00190)	--	--	--	--	--	--	--	--	--	--	--	--	--	--	--	--	--	--
c64504.graph_c0	9.86	10.03	11.88	9.88	10.08	10.14	10.57	9.18	11.03	10.2944	0.735846	0.0714799	-0.00439581	0.00439581	0.107935	0.107935	0.122043	0.122043	[F]	Nucleotide transport and metabolism	Molecular Function: adenosine deaminase activity (GO:0004000);; Biological Process: purine ribonucleoside monophosphate biosynthetic process (GO:0009168);;	K01488|2.20918e-142|pop:POPTR_0021s01090g|adenosine/AMP deaminase family protein; K01488 adenosine deaminase [EC:3.5.4.4] (A)	[F]	Nucleotide transport and metabolism	Adenosine/AMP deaminase	--	F	Nucleotide transport and metabolism	adenosine/AMP deaminase family protein [Populus trichocarpa]	biological process: metabolic process (GO:0008152);; molecular function: catalytic activity (GO:0003824);; biological process: cellular process (GO:0009987);; biological process: single-organism process (GO:0044699)	Purine metabolism (ko00230)	--	--	--	--	--	--	--	--	--	--	--	--	--	--	--	--	--	--
c60403.graph_c0	168.23	140.23	155.04	139.21	147.59	139.64	134.64	139.56	124.79	143.214	11.7796	0.0822512	-0.0854316	0.0854316	-0.107695	0.107695	-0.0130508	0.0130508	[J]	Translation, ribosomal structure and biogenesis	Molecular Function: structural constituent of ribosome (GO:0003735);; Cellular Component: nucleolus (GO:0005730);; Biological Process: translation (GO:0006412);; Cellular Component: cytosolic small ribosomal subunit (GO:0022627);;	K02973|3.15323e-92|vvi:100242825|40S ribosomal protein S23-like; K02973 small subunit ribosomal protein S23e (A)	[J]	Translation, ribosomal structure and biogenesis	Ribosomal protein S12/S23	40S ribosomal protein S23 GN=RPS23 OS=Fragaria ananassa (Strawberry) PE=2 SV=1	J	Translation, ribosomal structure and biogenesis	hypothetical protein VITISV_024242 [Vitis vinifera]	molecular function: structural molecule activity (GO:0005198);; cellular component: cell (GO:0005623);; cellular component: membrane-enclosed lumen (GO:0031974);; cellular component: organelle (GO:0043226);; cellular component: organelle part (GO:0044422);; cellular component: cell part (GO:0044464);; biological process: metabolic process (GO:0008152);; biological process: cellular process (GO:00…	Ribosome (ko03010)	--	--	--	--	--	--	--	--	--	--	--	--	--	--	--	--	--	--
c63041.graph_c0	9.97	11.66	9.38	10.42	11.62	11.68	10.52	9.55	10.26	10.5622	0.847202	0.0802105	0.18641	0.18641	0.107474	0.107474	-0.0688253	0.0688253	[R]	General function prediction only	Molecular Function: metalloendopeptidase activity (GO:0004222);; Biological Process: proteolysis (GO:0006508);; Molecular Function: zinc ion binding (GO:0008270);; Cellular Component: chloroplast (GO:0009507);;	--	[O]	Posttranslational modification, protein turnover, chaperones	Peptidase M16 inactive domain;; Insulinase (Peptidase family M16)	Ubiquinol-cytochrome-c reductase complex core protein I, mitochondrial (Precursor) OS=Euglena gracilis PE=2 SV=1	O	Posttranslational modification, protein turnover, chaperones	Mitochondrial-processing peptidase subunit beta, mitochondrial, putative [Theobroma cacao]	biological process: metabolic process (GO:0008152);; molecular function: catalytic activity (GO:0003824);; molecular function: binding (GO:0005488);; cellular component: cell (GO:0005623);; cellular component: organelle (GO:0043226);; cellular component: cell part (GO:0044464)	--	1	p1	(A)16	16	5	20	--	--	--	--	--	--	--	--	--	--	--	--
c69853.graph_c0	103.41	113.35	85.74	90.42	101.49	91.61	79.56	70.17	98.83	92.7311	12.4322	0.134068	0.0269192	0.0269192	-0.106966	0.106966	-0.123756	0.123756	--	--	Cellular Component: endosome (GO:0005768);; Cellular Component: vacuolar membrane (GO:0005774);; Cellular Component: Golgi apparatus (GO:0005794);; Cellular Component: trans-Golgi network (GO:0005802);; Cellular Component: plasma membrane (GO:0005886);; Biological Process: acetyl-CoA metabolic process (GO:0006084);; Biological Process: sterol biosynthetic process (GO:0016126);; Biological Process…	--	[G]	Carbohydrate transport and metabolism	Protein of unknown function (DUF791)	--	G	Carbohydrate transport and metabolism	Major facilitator superfamily domain-containing protein 5 [Gossypium arboreum]	cellular component: cell (GO:0005623);; cellular component: organelle (GO:0043226);; cellular component: cell part (GO:0044464);; cellular component: membrane (GO:0016020);; cellular component: organelle part (GO:0044422);; biological process: metabolic process (GO:0008152);; biological process: cellular process (GO:0009987);; biological process: single-organism process (GO:0044699);; biological …	--	1	p1	(A)18	18	40	57	TGTAGTCCACGACTTGCAAAA	59.376	21	ACCAGGTCCACAATTTGAGC	59.973	20	272	4	275	TGTAGTCCACGACTTGCAAAA	59.376	21
c69083.graph_c4	248.15	231.82	279.3	227.32	220.94	235.37	225.65	192.77	217.92	231.027	22.168	0.0959541	-0.101935	0.101935	-0.106732	0.106732	0.00457628	0.00457628	--	--	Molecular Function: translation initiation factor activity (GO:0003743);; Biological Process: translational initiation (GO:0006413);; Cellular Component: membrane (GO:0016020);; Biological Process: RNA metabolic process (GO:0016070);;	--	[J]	Translation, ribosomal structure and biogenesis	eIF4-gamma/eIF5/eIF2-epsilon	--	J	Translation, ribosomal structure and biogenesis	translation initiation factor, putative [Ricinus communis]	biological process: metabolic process (GO:0008152);; biological process: cellular process (GO:0009987);; molecular function: binding (GO:0005488);; cellular component: membrane (GO:0016020)	--	2	p1	(A)10	10	1593	1602	TTGTTCCCATTTTGGTTTCC	59.64	20	AAGATGCCATGCAGAATGTTT	59.588	21	202	1568	1769	TTGTTCCCATTTTGGTTTCC	59.64	20
c51879.graph_c0	6.6	6.03	5.85	5.56	7.12	7.18	5.38	7.26	6	6.33111	0.683869	0.108017	0.122969	0.122969	0.106645	0.106645	-0.00666311	0.00666311	--	--	Cellular Component: mitochondrial inner membrane (GO:0005743);; Biological Process: mitochondrial transport (GO:0006839);; Cellular Component: integral component of membrane (GO:0016021);;	--	--	--	Mitochondrial carrier protein	--	C	Energy production and conversion	PREDICTED: solute carrier family 25 member 48 [Prunus mume]	cellular component: cell (GO:0005623);; cellular component: membrane (GO:0016020);; cellular component: organelle (GO:0043226);; cellular component: organelle part (GO:0044422);; cellular component: cell part (GO:0044464);; biological process: single-organism process (GO:0044699);; biological process: localization (GO:0051179);; cellular component: membrane part (GO:0044425)	--	--	--	--	--	--	--	--	--	--	--	--	--	--	--	--	--	--	--
c61061.graph_c0	75.95	58.07	58.81	71.51	60.77	65.6	62.3	42.56	53.93	61.0556	9.1908	0.150532	0.0947262	0.0947262	-0.106394	0.106394	-0.191674	0.191674	--	--	--	--	[K]	Transcription	Myb/SANT-like DNA-binding domain;; Myb/SANT-like DNA-binding domain	Trihelix transcription factor GTL2 GN=At5g28300 OS=Arabidopsis thaliana (Mouse-ear cress) PE=2 SV=1	K	Transcription	PREDICTED: trihelix transcription factor GTL2 [Vitis vinifera]	--	--	3	p3	(TAT)6	18	2415	2432	TGCTAGTGATTCAACCGTGC	59.871	20	GTCGGTGCCCACTACAAAAC	60.419	20	261	2283	2543	TGCTAGTGATTCAACCGTGC	59.871	20
c61972.graph_c0	17	11.92	17.66	18.02	14.25	15.79	15.44	17.89	12.76	15.6367	2.12875	0.136138	0.097296	0.097296	0.106003	0.106003	0.0188471	0.0188471	--	--	--	--	--	--	--	--	--	--	--	--	--	--	--	--	--	--	--	--	--	--	--	--	--	--	--	--	--	--	--
c65940.graph_c0	9.58	8.22	7.23	8.82	7.98	9.24	8.83	7.08	8.03	8.33444	0.808127	0.0969623	0.164554	0.164554	0.105893	0.105893	-0.0488974	0.0488974	[R]	General function prediction only	Molecular Function: protein kinase activity (GO:0004672);; Molecular Function: ATP binding (GO:0005524);; Biological Process: protein phosphorylation (GO:0006468);;	K08869|0|rcu:RCOM_0920180|Protein ABC1, mitochondrial precursor, putative; K08869 aarF domain-containing kinase (A)	[R]	General function prediction only	ABC1 family;; Phosphotransferase enzyme family	Uncharacterized aarF domain-containing protein kinase At1g79600, chloroplastic (Precursor) GN=At1g79600 OS=Arabidopsis thaliana (Mouse-ear cress) PE=2 SV=1	R	General function prediction only	PREDICTED: uncharacterized aarF domain-containing protein kinase At1g79600, chloroplastic [Vitis vinifera]	biological process: metabolic process (GO:0008152);; biological process: cellular process (GO:0009987);; molecular function: catalytic activity (GO:0003824);; molecular function: binding (GO:0005488)	--	--	--	--	--	--	--	--	--	--	--	--	--	--	--	--	--	--	--
c66116.graph_c1	49.95	59.47	50.81	40.74	47.61	40.71	42.88	44.33	40.51	46.3344	5.96359	0.128708	-0.166337	0.166337	-0.105811	0.105811	0.0706323	0.0706323	[R]	General function prediction only	Cellular Component: cytosol (GO:0005829);; Biological Process: RNA processing (GO:0006396);; Biological Process: regulation of timing of transition from vegetative to reproductive phase (GO:0048510);;	K13217|0|crb:CARUB_v10010956mg|hypothetical protein; K13217 pre-mRNA-processing factor 39 (A)	[A]	RNA processing and modification	--	--	A	RNA processing and modification	pre-mRNA-processing factor 39 [Arabidopsis thaliana]	cellular component: cell (GO:0005623);; cellular component: cell part (GO:0044464);; biological process: metabolic process (GO:0008152);; biological process: cellular process (GO:0009987);; biological process: biological regulation (GO:0065007)	--	3	p1	(A)10	10	4117	4126	TCTAAAATTGCGCTCGTATGC	60.369	21	TCTTTTCAACTGCAACACCG	59.881	20	158	4001	4158	CTAAAATTGCGCTCGTATGC	58.611	20
c73117.graph_c0	16.04	12.16	11.57	14.05	13.85	12.53	13.15	14.46	11.77	13.2867	1.37297	0.103334	0.0739454	0.0739454	0.105611	0.105611	0.0411612	0.0411612	--	--	Biological Process: protein glycosylation (GO:0006486);; Biological Process: Lewis a epitope biosynthetic process (GO:0010493);; Cellular Component: integral component of membrane (GO:0016021);; Molecular Function: 3-galactosyl-N-acetylglucosaminide 4-alpha-L-fucosyltransferase activity (GO:0017060);; Cellular Component: Golgi cisterna membrane (GO:0032580);; Biological Process: fucosylation (GO:…	K14412|0|vvi:100256631|alpha-(1,4)-fucosyltransferase; K14412 alpha-1,4-fucosyltransferase [EC:2.4.1.-] (A)	[GE]	--	Glycosyltransferase family 10 (fucosyltransferase)	Alpha-(1,4)-fucosyltransferase GN=FUT13 OS=Arabidopsis thaliana (Mouse-ear cress) PE=2 SV=2	G	Carbohydrate transport and metabolism	PREDICTED: alpha-(1,4)-fucosyltransferase-like isoform X3 [Populus euphratica]	biological process: metabolic process (GO:0008152);; biological process: cellular process (GO:0009987);; biological process: single-organism process (GO:0044699);; cellular component: membrane (GO:0016020);; cellular component: membrane part (GO:0044425);; molecular function: catalytic activity (GO:0003824);; cellular component: cell (GO:0005623);; cellular component: organelle (GO:0043226);; cel…	--	--	--	--	--	--	--	--	--	--	--	--	--	--	--	--	--	--	--
c69324.graph_c2	38.63	39.42	33.79	38	36.5	40.08	36.72	39.6	38.47	37.9122	1.85783	0.0490034	0.0936154	0.0936154	0.105327	0.105327	0.0224972	0.0224972	[R]	General function prediction only	--	--	--	--	RNA recognition motif. (a.k.a. RRM, RBD, or RNP domain);; RNA recognition motif (a.k.a. RRM, RBD, or RNP domain);; RNA recognition motif. (a.k.a. RRM, RBD, or RNP domain)	Golgin candidate 2 GN=GC2 OS=Arabidopsis thaliana (Mouse-ear cress) PE=1 SV=1	S	Function unknown	Golgin candidate 2, putative isoform 1 [Theobroma cacao]	--	--	--	--	--	--	--	--	--	--	--	--	--	--	--	--	--	--	--	--
c68216.graph_c0	10.59	7.96	6.99	7.66	7.62	7.97	6.28	6.06	7.13	7.58444	1.24345	0.163947	0.0817803	0.0817803	-0.105209	0.105209	-0.177108	0.177108	--	--	--	--	--	--	--	--	S	Function unknown	hypothetical protein PRUPE_ppa008107mg [Prunus persica]	--	--	--	--	--	--	--	--	--	--	--	--	--	--	--	--	--	--	--	--
c70677.graph_c0	101.42	93.68	114.3	104.6	108.4	118.34	100.15	95.54	100.3	104.081	7.7791	0.0747407	0.109546	0.109546	0.104338	0.104338	0.00409457	0.00409457	--	--	Molecular Function: ubiquitin-protein transferase activity (GO:0004842);; Molecular Function: protein binding (GO:0005515);; Cellular Component: nucleus (GO:0005634);; Biological Process: postreplication repair (GO:0006301);; Biological Process: ubiquitin-dependent protein catabolic process (GO:0006511);; Cellular Component: chloroplast (GO:0009507);; Biological Process: response to iron ion (GO:…	K10580|2.05281e-38|pvu:PHAVU_011G160100g|hypothetical protein; K10580 ubiquitin-conjugating enzyme E2 N [EC:6.3.2.19] (A)	[O]	Posttranslational modification, protein turnover, chaperones	Ubiquitin-conjugating enzyme;; Ubiquitin-conjugating enzyme	Ubiquitin-conjugating enzyme E2 35 GN=F9K20.8 OS=Arabidopsis thaliana (Mouse-ear cress) PE=1 SV=1	O	Posttranslational modification, protein turnover, chaperones	hypothetical protein CICLE_v10022662mg [Citrus clementina]	biological process: metabolic process (GO:0008152);; biological process: cellular process (GO:0009987);; molecular function: catalytic activity (GO:0003824);; molecular function: binding (GO:0005488);; cellular component: cell (GO:0005623);; cellular component: organelle (GO:0043226);; cellular component: cell part (GO:0044464);; biological process: single-organism process (GO:0044699);; biologic…	Ubiquitin mediated proteolysis (ko04120)	4	p1	(A)12	12	3085	3096	--	--	--	--	--	--	--	--	--	--	--	--
c67895.graph_c0	10.04	12.69	8.78	10.36	10.47	11.23	10.67	9.73	10.04	10.4456	1.01796	0.0974541	0.0914783	0.0914783	0.104224	0.104224	0.0239031	0.0239031	[R]	General function prediction only	--	--	[BK]	--	SET domain;; PHD-zinc-finger like domain;; PHD-like zinc-binding domain	Histone-lysine N-methyltransferase ATX1 GN=T9H9.17 OS=Arabidopsis thaliana (Mouse-ear cress) PE=1 SV=2	R	General function prediction only	PREDICTED: uncharacterized protein LOC100255892 isoform X2 [Vitis vinifera]	--	--	1	p2	(AT)6	12	6139	6150	GGGTGTGGGTGTGTACTGTG	59.757	20	TGAATGCAGCCTAGATGTGC	59.979	20	271	6113	6383	GAAACCACTCGGTCAAGCAT	60.119	20
c64046.graph_c0	49.02	41.6	43.84	42.85	48.65	46.95	41.26	37.48	37	43.1833	4.15865	0.0963021	0.0701002	0.0701002	-0.104034	0.104034	-0.165204	0.165204	--	--	--	--	[Z]	Cytoskeleton	CTLH/CRA C-terminal to LisH motif domain;; LisH	--	Z	Cytoskeleton	hypothetical protein CICLE_v10016453mg [Citrus clementina]	--	--	--	--	--	--	--	--	--	--	--	--	--	--	--	--	--	--	--	--
c68095.graph_c0	27.4	28.31	25.41	22.45	29.2	23.92	26.62	27.83	25.5	26.2933	2.0554	0.0781719	-0.084478	0.084478	0.103949	0.103949	0.197354	0.197354	--	--	Molecular Function: RNA binding (GO:0003723);;	K13162|2.31834e-79|tcc:TCM_005687|RNA-binding KH domain-containing protein isoform 1; K13162 poly(rC)-binding protein 2/3/4 (A)	[AR]	--	KH domain;; KH domain;; KH domain;; KH domain;; KH domain;; KH domain	--	A	RNA processing and modification	RNA-binding KH domain-containing protein isoform 1 [Theobroma cacao]	molecular function: binding (GO:0005488)	--	2	p3	(ATG)5	15	1950	1964	AGCCCGAGAATTCAAGATCA	59.773	20	ACATTCTGGATTCATGGGGA	60.135	20	217	1861	2077	AGCCCGAGAATTCAAGATCA	59.773	20
c70736.graph_c0	28.21	29.58	37.04	27.74	31.08	35.21	25.92	26.59	30.46	30.2033	3.56642	0.11808	-0.0163857	0.0163857	-0.103693	0.103693	-0.0776733	0.0776733	--	--	Cellular Component: vacuolar membrane (GO:0005774);; Biological Process: transport (GO:0006810);; Molecular Function: nucleoside transmembrane transporter activity, against a concentration gradient (GO:0010174);; Cellular Component: integral component of membrane (GO:0016021);;	K15014|2.25272e-124|rcu:RCOM_0527650|nucleoside transporter, putative; K15014 solute carrier family 29 (equilibrative nucleoside transporter), member 1/2/3 (A)	[F]	Nucleotide transport and metabolism	Nucleoside transporter;; Nucleoside transporter;; gag-polypeptide of LTR copia-type	Equilibrative nucleotide transporter 1 GN=ENT1 OS=Arabidopsis thaliana (Mouse-ear cress) PE=1 SV=1	P	Inorganic ion transport and metabolism	Equilibrative nucleoside transporter 4 [Morus notabilis]	cellular component: cell (GO:0005623);; cellular component: membrane (GO:0016020);; cellular component: organelle (GO:0043226);; cellular component: organelle part (GO:0044422);; cellular component: cell part (GO:0044464);; biological process: localization (GO:0051179);; biological process: cellular process (GO:0009987);; biological process: single-organism process (GO:0044699);; molecular functi…	--	1	p1	(A)11	11	2083	2093	GGATAGGAGGGTGGTGGATT	60.015	20	TTTTTGCTTACAAGGCGCTC	60.508	20	259	1859	2117	AGGTGATGGATTTGACGGAG	59.927	20
c66694.graph_c1	19.84	20.93	25.32	19.2	22.27	18.65	15.54	23.56	18.64	20.4389	2.77868	0.135951	-0.0907556	0.0907556	-0.103666	0.103666	-0.00323456	0.00323456	--	--	--	--	--	--	No apical meristem (NAM) protein	NAC domain-containing protein 67 OS=Oryza sativa subsp. japonica (Rice) PE=2 SV=1	R	General function prediction only	PREDICTED: NAC domain-containing protein 72-like [Malus domestica]	--	--	--	--	--	--	--	--	--	--	--	--	--	--	--	--	--	--	--	--
c69355.graph_c0	33.43	47.15	40.68	34.52	44.83	41.41	34.08	44.56	41.35	40.2233	4.79943	0.11932	0.0327561	0.0327561	0.10343	0.10343	0.0809601	0.0809601	--	--	--	--	--	--	--	--	R	General function prediction only	PREDICTED: uncharacterized protein LOC103409514 [Malus domestica]	--	--	1	p2	(CT)8	16	1836	1851	TTTCCATACCAAACATCGCA	59.93	20	TCCATGCAAGGCAATACAAA	60.073	20	106	1775	1880	TTCCATACCAAACATCGCAA	59.93	20
c64177.graph_c0	71.04	56.46	64.62	60.87	65.26	63.69	68.88	54.43	61.53	62.9756	5.05891	0.0803313	0.0770726	0.0770726	0.103337	0.103337	0.0347257	0.0347257	[U]	Intracellular trafficking, secretion, and vesicular transport	Biological Process: GTP catabolic process (GO:0006184);; Molecular Function: metal ion binding (GO:0046872);;	--	[T]	Signal transduction mechanisms	Putative GTPase activating protein for Arf	Probable ADP-ribosylation factor GTPase-activating protein AGD14 GN=At1g08680/At1g08690 OS=Arabidopsis thaliana (Mouse-ear cress) PE=1 SV=2	T	Signal transduction mechanisms	NSP-interacting GTPase, putative isoform 3 [Theobroma cacao]	biological process: metabolic process (GO:0008152);; biological process: cellular process (GO:0009987);; biological process: single-organism process (GO:0044699);; molecular function: binding (GO:0005488)	--	1	p2	(TC)9	18	3	20	--	--	--	--	--	--	--	--	--	--	--	--
c66257.graph_c2	20.89	19.36	12.72	15.18	17.35	13.55	17.52	17.68	13.34	16.3989	2.69225	0.164173	-0.0478683	0.0478683	0.103107	0.103107	0.160717	0.160717	[R]	General function prediction only	Biological Process: entrainment of circadian clock by photoperiod (GO:0043153);; Biological Process: photoperiodism, flowering (GO:0048573);;	K11805|8.73923e-124|mdm:103423336|WD repeat-containing protein LWD1-like; K11805 WD repeat-containing protein 68 (A)	[S]	Function unknown	WD domain, G-beta repeat	WD repeat-containing protein LWD1 GN=F13K23.16 OS=Arabidopsis thaliana (Mouse-ear cress) PE=2 SV=1	R	General function prediction only	PREDICTED: LOW QUALITY PROTEIN: WD repeat-containing protein LWD1-like, partial [Malus domestica]	biological process: response to stimulus (GO:0050896);; biological process: biological regulation (GO:0065007);; biological process: reproductive process (GO:0022414);; biological process: multicellular organismal process (GO:0032501);; biological process: developmental process (GO:0032502);; biological process: single-organism process (GO:0044699)	--	1	p1	(T)13	13	720	732	TGTCTGGTGGGTTTGGATTT	60.21	20	ATTGGTGTGTGCTTGCATGT	60.04	20	182	600	781	TGTCTGGTGGGTTTGGATTT	60.21	20
c68022.graph_c0	52.64	40.49	43.89	42.67	40.56	45.03	46.81	44.51	45.09	44.6322	3.45434	0.0773956	-0.0436073	0.0436073	0.103093	0.103093	0.156448	0.156448	[O]	Posttranslational modification, protein turnover, chaperones	Molecular Function: threonine-type endopeptidase activity (GO:0004298);; Cellular Component: nucleus (GO:0005634);; Cellular Component: cytoplasm (GO:0005737);; Cellular Component: proteasome core complex (GO:0005839);; Biological Process: proteolysis involved in cellular protein catabolic process (GO:0051603);;	K02734|3.15079e-136|gmx:100499738|uncharacterized LOC100499738; K02734 20S proteasome subunit beta 4 [EC:3.4.25.1] (A)	[O]	Posttranslational modification, protein turnover, chaperones	Proteasome subunit	Proteasome subunit beta type-2-A GN=F16J14.18 OS=Arabidopsis thaliana (Mouse-ear cress) PE=1 SV=1	O	Posttranslational modification, protein turnover, chaperones	uncharacterized protein LOC100499738 [Glycine max]	biological process: metabolic process (GO:0008152);; molecular function: catalytic activity (GO:0003824);; cellular component: cell (GO:0005623);; cellular component: organelle (GO:0043226);; cellular component: cell part (GO:0044464);; cellular component: macromolecular complex (GO:0032991);; biological process: cellular process (GO:0009987)	Proteasome (ko03050)	1	p1	(T)11	11	1280	1290	--	--	--	--	--	--	--	--	--	--	--	--
c51201.graph_c0	15.03	15.9	12.87	14.42	12.81	13.66	11.28	14.08	13.2	13.6944	1.28497	0.0938318	-0.044282	0.044282	-0.102922	0.102922	-0.0468125	0.0468125	--	--	--	--	--	--	--	--	--	--	--	--	--	--	--	--	--	--	--	--	--	--	--	--	--	--	--	--	--	--	--
c72616.graph_c0	136.34	133.15	151.66	121.02	140.16	124.48	104.48	128.83	143.55	131.519	13.1195	0.0997536	-0.132742	0.132742	-0.102481	0.102481	0.0397159	0.0397159	--	--	--	--	--	--	MuDR family transposase	--	S	Function unknown	hypothetical protein VITISV_037733 [Vitis vinifera]	--	--	2	p3	(GAA)5	15	1989	2003	CCAAGTCGCTAATCTCTGCC	59.978	20	CTGAATTTGGAGACCGAAGC	59.813	20	267	1816	2082	CCCAAGTCGCTAATCTCTGC	59.978	20
c66671.graph_c4	14.28	18.98	18.68	18.31	13.36	13.1	17.61	18.18	13.74	16.2489	2.39517	0.147405	-0.13752	0.13752	-0.102241	0.102241	0.0487074	0.0487074	[H]	Coenzyme transport and metabolism	Cellular Component: cytosol (GO:0005829);; Molecular Function: pyridoxal kinase activity (GO:0008478);; Biological Process: pyridoxine biosynthetic process (GO:0008615);; Biological Process: pyridoxal 5'-phosphate salvage (GO:0009443);; Biological Process: trichoblast differentiation (GO:0010054);; Biological Process: phosphorylation (GO:0016310);; Biological Process: hyperosmotic salinity respon…	K00868|8.43095e-60|vvi:100251978|pyridoxal kinase; K00868 pyridoxine kinase [EC:2.7.1.35] (A)	[H]	Coenzyme transport and metabolism	Phosphomethylpyrimidine kinase	Pyridoxal kinase GN=K18L3_10 OS=Arabidopsis thaliana (Mouse-ear cress) PE=1 SV=2	H	Coenzyme transport and metabolism	hypothetical protein JCGZ_16353 [Jatropha curcas]	cellular component: cell (GO:0005623);; cellular component: cell part (GO:0044464);; biological process: metabolic process (GO:0008152);; biological process: cellular process (GO:0009987);; molecular function: catalytic activity (GO:0003824);; biological process: single-organism process (GO:0044699);; biological process: multicellular organismal process (GO:0032501);; biological process: developm…	Vitamin B6 metabolism (ko00750)	2	p1	(A)10	10	1535	1544	CCAAATACAACCTACCGCTTC	58.64	21	GAAATTGCCAAGGTTAAATTCG	59.851	22	279	1381	1659	CAAATACAACCTACCGCTTCC	58.64	21
c61994.graph_c0	74.84	71.59	67.82	80.94	72.97	74.5	82.78	68.15	63.44	73.0033	5.85059	0.0801415	0.128127	0.128127	0.102176	0.102176	-0.0159705	0.0159705	[HC]	--	Molecular Function: cytochrome-b5 reductase activity, acting on NAD(P)H (GO:0004128);; Cellular Component: endoplasmic reticulum (GO:0005783);; Cellular Component: plasma membrane (GO:0005886);; Biological Process: N-terminal protein myristoylation (GO:0006499);; Cellular Component: plant-type cell wall (GO:0009505);; Biological Process: electron transport chain (GO:0022900);; Biological Process:…	K00326|6.3835e-129|cic:CICLE_v10032349mg|hypothetical protein; K00326 cytochrome-b5 reductase [EC:1.6.2.2] (A)	[HC]	--	Oxidoreductase FAD-binding domain;; Oxidoreductase NAD-binding domain;; Oxidoreductase NAD-binding domain	NADH--cytochrome b5 reductase 1 GN=MVA3.13 OS=Arabidopsis thaliana (Mouse-ear cress) PE=1 SV=1	H	Coenzyme transport and metabolism	NADH-cytochrome b5 reductase 1 [Morus notabilis]	biological process: metabolic process (GO:0008152);; biological process: single-organism process (GO:0044699);; molecular function: catalytic activity (GO:0003824);; cellular component: cell (GO:0005623);; cellular component: organelle (GO:0043226);; cellular component: cell part (GO:0044464);; cellular component: membrane (GO:0016020);; biological process: cellular process (GO:0009987)	Amino sugar and nucleotide sugar metabolism (ko00520)	1	p1	(A)10	10	1037	1046	TGAAAATGATGGGAAGGCA	59.994	19	TACTCGGATGCATGCACAAT	60.104	20	271	934	1204	TGAAAATGATGGGAAGGCA	59.994	19
c58583.graph_c0	7.18	6.37	6.05	7.22	5.93	6.79	6.49	7.01	5.82	6.54	0.507434	0.0775892	0.0720674	0.0720674	0.101938	0.101938	0.0409689	0.0409689	--	--	Cellular Component: plasma membrane (GO:0005886);; Molecular Function: transferase activity, transferring phosphorus-containing groups (GO:0016772);;	--	--	--	--	--	S	Function unknown	PREDICTED: uncharacterized protein LOC102612076 [Citrus sinensis]	cellular component: cell (GO:0005623);; cellular component: membrane (GO:0016020);; cellular component: cell part (GO:0044464);; biological process: metabolic process (GO:0008152);; molecular function: catalytic activity (GO:0003824)	--	--	--	--	--	--	--	--	--	--	--	--	--	--	--	--	--	--	--
c68510.graph_c0	99.59	104.39	99.07	114.99	109.08	121.53	124.9	112.26	108.2	110.446	8.47587	0.0767425	0.0869253	0.0869253	0.101618	0.101618	0.0250072	0.0250072	--	--	--	--	[R]	General function prediction only	Alpha/beta hydrolase family	--	R	General function prediction only	Alpha/beta-Hydrolases superfamily protein isoform 3, partial [Theobroma cacao]	--	--	3	p4	(AAAT)5	20	3300	3319	CTTTCATGCACACACCCAGT	59.597	20	GCTTGTGTGTTTTGAGCCCT	60.299	20	243	3100	3342	ACTTTCATGCACACACCCAG	59.597	20
c70799.graph_c2	13.19	14.54	13.66	12.15	16.56	14.22	13.41	12	15.22	13.8833	1.36633	0.0984154	0.105363	0.105363	0.10145	0.10145	0.00506428	0.00506428	--	--	--	--	[R]	General function prediction only	Reverse transcriptase-like;; zinc-binding in reverse transcriptase	Uncharacterized mitochondrial protein AtMg00310 GN=AtMg00310 OS=Arabidopsis thaliana (Mouse-ear cress) PE=4 SV=1	R	General function prediction only	PREDICTED: putative ribonuclease H protein At1g65750-like [Citrus sinensis]	--	--	2	p1	(A)10	10	283	292	CGAGAAATGGCTGACTTTGG	60.766	20	GCCTAAAGTGTTTCATCGCC	59.713	20	246	154	399	TCGAGAAATGGCTGACTTTG	58.999	20
c48481.graph_c0	13.49	15.32	16.92	15.97	16.54	14.41	18.33	9.12	12.05	14.6833	2.6498	0.180463	0.0754923	0.0754923	-0.101408	0.101408	-0.168872	0.168872	--	--	--	--	[S]	Function unknown	BSD domain	--	S	Function unknown	PREDICTED: protein DOS2 [Prunus mume]	--	--	--	--	--	--	--	--	--	--	--	--	--	--	--	--	--	--	--	--
c55697.graph_c0	17.73	14.63	12.81	20.69	16.81	19.4	17.83	17.08	16.03	17.0011	2.22995	0.131165	0.194956	0.194956	0.10133	0.10133	-0.0831006	0.0831006	[J]	Translation, ribosomal structure and biogenesis	Molecular Function: 3'-5'-exoribonuclease activity (GO:0000175);; Biological Process: mRNA splicing, via spliceosome (GO:0000398);; Biological Process: RNA methylation (GO:0001510);; Molecular Function: RNA binding (GO:0003723);; Biological Process: protein targeting to mitochondrion (GO:0006626);; Biological Process: protein maturation (GO:0051604);;	K12590|2.97652e-35|pmum:103320210|exosome complex exonuclease RRP46 homolog; K12590 exosome complex component RRP46 (A)	[J]	Translation, ribosomal structure and biogenesis	3' exoribonuclease family, domain 1	Exosome complex exonuclease RRP46 homolog GN=RRP46 OS=Oryza sativa subsp. japonica (Rice) PE=1 SV=2	J	Translation, ribosomal structure and biogenesis	PREDICTED: exosome complex exonuclease RRP46 homolog [Prunus mume]	biological process: metabolic process (GO:0008152);; biological process: cellular process (GO:0009987);; molecular function: catalytic activity (GO:0003824);; molecular function: binding (GO:0005488);; biological process: single-organism process (GO:0044699);; biological process: localization (GO:0051179);; biological process: cellular component organization or biogenesis (GO:0071840)	RNA degradation (ko03018)	1	p1	(A)10	10	2041	2050	TCCTTTTCCTGCTTTCCTGA	59.926	20	GGATGCTCTTGCTGGTTCAT	60.226	20	184	1904	2087	CTGAGGTTGTGGTGTTTGGA	59.565	20
c60985.graph_c0	13.59	14.84	12.93	13.98	14.56	13.21	12.9	14.83	14.36	13.9111	0.738925	0.0531176	0.0240816	0.0240816	0.101087	0.101087	0.0875267	0.0875267	[O]	Posttranslational modification, protein turnover, chaperones	Biological Process: peptidyl-lysine modification to peptidyl-hypusine (GO:0008612);; Biological Process: embryo sac development (GO:0009553);; Molecular Function: deoxyhypusine synthase activity (GO:0034038);; Molecular Function: homospermidine synthase (spermidine-specific) activity (GO:0050514);; Biological Process: deoxyhypusine biosynthetic process from spermidine (GO:0050983);;	K00809|7.43965e-115|rcu:RCOM_0663340|deoxyhypusine synthase, putative (EC:2.5.1.45); K00809 deoxyhypusine synthase [EC:2.5.1.46] (A)	[O]	Posttranslational modification, protein turnover, chaperones	Deoxyhypusine synthase;; Deoxyhypusine synthase	Deoxyhypusine synthase GN=DHS OS=Brassica napus (Rape) PE=2 SV=1	O	Posttranslational modification, protein turnover, chaperones	hypothetical protein EUGRSUZ_C00926 [Eucalyptus grandis]	biological process: metabolic process (GO:0008152);; biological process: cellular process (GO:0009987);; biological process: single-organism process (GO:0044699);; biological process: multicellular organismal process (GO:0032501);; biological process: developmental process (GO:0032502);; molecular function: catalytic activity (GO:0003824)	--	1	p1	(T)11	11	1557	1567	TTGCAGCAAAGAAGGGATCT	59.955	20	TCAATTTCAACCCACAGCAC	59.547	20	188	1424	1611	GTGGGGGAAAATACGAGGTT	60.053	20
c73905.graph_c0	35.89	32.06	30.59	32.85	34.53	37.87	34.66	33.65	30.9	33.6667	2.22891	0.0662051	0.144531	0.144531	0.101067	0.101067	-0.0336623	0.0336623	--	--	--	K03066|1.99656e-07|pop:POPTR_0010s10860g|POPTRDRAFT_805071; 26S proteasome subunit 8 family protein; K03066 26S proteasome regulatory subunit T6 (A)	[O]	Posttranslational modification, protein turnover, chaperones	--	26S protease regulatory subunit 8 homolog A GN=F28I16.140 OS=Arabidopsis thaliana (Mouse-ear cress) PE=1 SV=1	O	Posttranslational modification, protein turnover, chaperones	TAT-binding protein homolog [Picea mariana]	--	Proteasome (ko03050)	--	--	--	--	--	--	--	--	--	--	--	--	--	--	--	--	--	--
c70971.graph_c1	52.3	66.24	64.21	61.6	64.38	58.43	59.86	58.7	57.83	60.3944	4.01634	0.0665019	-0.170422	0.170422	-0.100925	0.100925	0.0802036	0.0802036	[H]	Coenzyme transport and metabolism	Molecular Function: ATP binding (GO:0005524);; Biological Process: cellular protein modification process (GO:0006464);; Molecular Function: small protein activating enzyme activity (GO:0008641);;	K10685|5.6867e-140|pmum:103335702|SUMO-activating enzyme subunit 2; K10685 ubiquitin-like 1-activating enzyme E1 B [EC:6.3.2.19] (A)	[O]	Posttranslational modification, protein turnover, chaperones	ThiF family;; Shikimate / quinate 5-dehydrogenase;; Ubiquitin/SUMO-activating enzyme ubiquitin-like domain;; Repeat in ubiquitin-activating (UBA) protein	SUMO-activating enzyme subunit 2 GN=F3K23.23 OS=Arabidopsis thaliana (Mouse-ear cress) PE=1 SV=1	O	Posttranslational modification, protein turnover, chaperones	PREDICTED: SUMO-activating enzyme subunit 2 [Prunus mume]	molecular function: binding (GO:0005488);; biological process: metabolic process (GO:0008152);; biological process: cellular process (GO:0009987);; molecular function: catalytic activity (GO:0003824)	Ubiquitin mediated proteolysis (ko04120)	1	p3	(GAA)5	15	4465	4479	TCTTCGAAGCCAGAGAGAGC	59.973	20	GATTCTCTCACGTCCCGTGT	60.12	20	239	4350	4588	GCCCCCTTTATTCCAGACAT	60.152	20
c70861.graph_c0	33.15	33.29	29.76	33.93	35.6	33.91	33.88	30.51	30.59	32.7356	1.86221	0.0568865	0.0892532	0.0892532	0.100903	0.100903	0.0215068	0.0215068	[RTKL]	--	--	--	--	--	Carbohydrate-binding protein of the ER;; Leucine Rich repeats (2 copies);; Leucine rich repeat;; Leucine Rich Repeat;; Protein kinase domain;; Protein tyrosine kinase;; Protein tyrosine kinase	Probable LRR receptor-like serine/threonine-protein kinase At1g67720 (Precursor) GN=At1g67720 OS=Arabidopsis thaliana (Mouse-ear cress) PE=2 SV=1	T	Signal transduction mechanisms	hypothetical protein JCGZ_16457 [Jatropha curcas]	--	--	1	p1	(A)10	10	3437	3446	CCATGTAATCGGGGATGAAG	60.148	20	GCCCTTATGCATCCAATAGAA	59.048	21	269	3232	3500	CATGTAATCGGGGATGAAGG	60.148	20
[truncated: 687 more rows]
[truncated: 15 more columns]
