# Supplementary material for: Comprehensive transcriptome analysis of reference genes for fruit development of Euscaphis konishii
Source: PeerJ. 2020 Feb 11;8:e8474. doi: 10.7717/peerj.8474 (PMC7020815; doi:10.7717/peerj.8474)
Supplement: Supplemental Information 9 [file peerj-08-8474-s009.xlsx]

## Sheet: Table S1
Table S2. Nucleotide sequences of the candidate reference genes
Gene name	Nucleotide sequences
EkGAPDH2	ATGGGCAAGATCAAGATCGGAATCAACGGATTTGGAAGGATCGGTCGTTTGGTTGCGAGAGTTGCTCTGCAGAGAGATGATGTTGAGCTCGTCGCTGTTAACGATCCCTTCATCACCACTGATTACATGACTTATATGTTTAAGTATGATAGTGTGCACGGTCAGTGGAAGCATCACGAGCTCAAGGTTAAGGACTCTAAGACCCTTCTCTTCGGCGAGAAGCCAGTCGCTGTCTTTGGTATCAGGAACCCAGAAGAGATCCCATGGTCTGAGGCTGGTGCTGACTATATTGTAGAGTCAACTGGAGTGTTCACTGACAAGGATAAGGCTGCTGCACATTTGAAGGGTGGTGCTAAGAAAGTCATTATCTCCGCCCCCAGCAAGGATGCTCCAATGTTT…
EkUBC23	ATGGTGGTGATCATTCACCACTCTCCCCGTTCACCAATACCTAGGCGTTCGTTCAAATACGCAAAACGCAATACGCCTCTTCCCTTGTTCAAAAATCTCCGATTCCGAAAGATGGGAACTGAGCAGAATGAAGCTGTTTCTAAAGTCAGCGATCCTACCACAAGAGTAGATGGTGAAGATTCTTCAAGCCAAAGTGCCACAATAGCAAGTGGGTTTGTTTGCAAAAGAAATGTAAATAGTGAACGCAATGAGGTTAGCAAACCTAATGATGTTGTAAGGAATATGCATAATACACCATATATTTATAGACAAGACGTTATATGGGGAAAAACCAATGGTTTGATTGGGATTGTGACTGAAGTTTCTGGTGACTCGGATTCAGATAGCAGCATTACTGAC…
EkCYP38	ATGGTAGCCATTGTTTCCTGTCACTGCTATTCTTCTCTGGCTACCTCCAAATTTTGCGGCCCAAAATTACTCCCAATTGCCCGCACCAGTGGAAATGCTGCGTTTCGGAAATTCGGATCTCCTTGTTCTTCCAAATCTCCTAATCAATGTCAGATCCGGAGTGAGCAGAAAGGGATACCCTTTTCCTTGAAGTTGAAGGAATGTGCGATTTCTATAGCTTTGGCAGCGGGGTTGATGACAGGAGTTCCTGCATTGGGTTGGCCTAATAATGCCAATGCAATTACTCCGGCTTTGCCATATTTGTCTGTGTTAATCTCAGGGCCACCCATTAAGGATCCGGGAGCATTGTTAAGAAATGCTCTGCCCATTAACAATAAAGCAATCAGGGAAGTGCAAAAG…
EkUBQ1	ATGCAGATATTCGTGAAAACCCTAACGGGGAAAACCATAACTCTCGAAGTGGAAAGCAGCGATACTATCGACAATGTCAAGTCTAAAATCCAAGACAAAGAAGGTATTCCTCCCGATCAGCAGCGTTTGATCTTTGCCGGAAAGCAACTTGAAGATGGCCGAACTCTTGCTGATTACAATATCCAGAAAGAATCAACGCTTCATCTTGTGTTGAGGCTTCGCGGAGGAATTATTGAACCTTCTTTGATGGCTTTGGCTCGTAAGTACAATCAAGACAAGATGATTTGTCGCAAATGTTATGCCCGTCTGCATCCAAGGGCTGTGAACTGCCGGAAGAAGAAGTGTGGTCATAGCAATCAGTTGAGGCCTAAGAAGAAGATCAAGTGA
EkTUA3	ATGAGAGAGATCATAAGCGTACACATAGGTCAGGCCGGAATCCAGGTCGGGAATTCATGCTGGGAGCTCTATTGCTTGGAGCACGGCATTCATCCCGATGGGATGATGCCCAGCGATACTTCAGTGGGCGTTGCGCACGATGCTTTCAATACCTTCTTCAGCGAGACCGGTTCAGGGAAGCACGTTCCCAGAGCCATATTCGTGGATCTGGAACCCACTGTGATCGATGAAGTTCGGACTGGGACTTACCGCCAGCTTTTCCATCCAGAGCAGCTCATTTCCGGAAAGGAAGATGCTGCTAATAATTTTGCCAGAGGCCACTATACAGTTGGGAAGGAAATTGTGGATCTATGTCTTGATCGAGTGAGGAAACTGGCAGATAACTGCACTGGTCTACAA…
EkmMDH2	ATGAGGTCCTCAGCCATGAAATCCATCCGCGCAGCCCTAAGAACCACCATCTCCTCGCACCTCCTCCGCCGCGGCTATGCCTCCCAGTCGGTACCAGAGCGCAAGGTCGCCGTGCTGGGCGCCGCCGGCGGAATCGGCCAGCCTTTGGCCCTACTCATGAGGCTGAACCCGCTCGTCTCAAACCTCGCCCTCTACGATATTGCTGGTACTCCTGGTGTTGCTGCCGATGTCAGCCACATCAACACAAGATCCGAGGTTGTGGGCTACATGGGCGAAGAACAGCTAGGGAAAGCTTTGGAGGGATCAGATGTTGTCATCATTCCTGCTGGTGTTCCAAGAAAGCCTGGCATGACCCGTGATGATCTTTTCAACATCAATGCTGGCATTGTCAAATCCCTG…
EkMDH	ATGGCAGCAACATCACCAGCTACCTTTTCAATTGGGTCGGCTATCTCCTTCAGCCCCAGAGTAAGCCAGCTGCCGCAACCAAAGCCCTTTGGTTTAAGGTTCAACTCCCATGACTCACTTGCAAGTTTTAGTGGCCTCAAGGCAGCGTCGTCTGTCAGCTTTGAGTCAGAATCATCCTTCTCAGGCAAGGAAAGTTGTGCAGCTCTTCGAGCCTCTTTTGCATTAAAATCCCAAAAACCAAACCAGCAGTTTCAGTATAACCTACAGCCCCAGGCATCTTTCAAGGTTGCAATTCTTGGAGCTGCTGGAGGGATAGGTCAGCCCCTAGCACTTCTTGTCAAGATGTCTCCATTAGTTTCAGCCTTGCACCTTTATGATATAGCAAATGTTAAGGGAGTT…
EkACT7	ATGGCCGATGAGGATATTCAGCCTCTTGTCTGTGACAATGGAACTGGAATGGTCAAGGCTGGGTTTGCTGGTGATGATGCTCCAAGGGCTGTATTCCCTAGTATTGTTGGCCGACCGCGACACACTGGTGTCATGGTTGGAATGGGCCAAAAGGATGCTTATGTAGGTGACGAGGCCCAGTCAAAAAGAGGTATCCTCACCTTGAAATATCCTATTGAGCATGGAATAGTCAGTAATTGGGATGACATGGAAAAGATCTGGCATCACACCTTCTACAATGAGCTTCGAGTTGCTCCTGAGGAGCACCCAGTACTTCTCACAGAGGCACCTCTCAACCCTAAGGCCAACAGGGAGAAGATGACTCAGATCATGTTTGAGACCTTCAATGCACCAGCTATG…
